# Supplementary material for: New avian protein sequences improve resolution of palaeoproteomic approaches to taxonomic identification &amp; reveal widespread intraspecies variability
Source: Research Square preprint supplement (doi:10.21203/rs.3.rs-5880462/v1), 2025-02-12
Supplement: Supplementary file 1 [file 341d9c7bef827d608b423d70.pdf]

## Supplementary Files

### Novel avian protein sequences improve resolution of palaeoproteomic approaches to taxonomic identification and reveal widespread intraspecies variability

Maria C. Codlin<sup>1</sup>, Lisa Yeomans<sup>2,3</sup>, Josefin Stiller<sup>4</sup>, Beatrice Demarchi<sup>1</sup>

<sup>1</sup> Department of Life Sciences and Systems Biology, University of Turin

<sup>2</sup> Globe Institute, Section for GeoBiology, University of Copenhagen

<sup>3</sup> Institute of Archaeology, University College London

<sup>4</sup> Department of Biology, University of Copenhagen

#### List of supplementary files for this manuscript

Supplementary Text.pdf (this file)

Supplementary Figures 1-13.pdf

Supplementary Figure 14.pdf

Supplementary Tables 1-8.xlsx

Supplementary Tables 14-37.xlsx

Supplementary Data available on Zenodo 10.5281/zenodo.14676027

|                                                                                                                                                                                              |           |
|----------------------------------------------------------------------------------------------------------------------------------------------------------------------------------------------|-----------|
| <b>Supplementary Text.....</b>                                                                                                                                                               | <b>3</b>  |
| <b>Supplementary Note 1: Assessment of annotation quality.....</b>                                                                                                                           | <b>3</b>  |
| <b>Supplementary Note 2: Comparison of annotated <i>Anas platyrhynchos</i> sequences and SRA support for OC116 SAPs.....</b>                                                                 | <b>4</b>  |
| Supplementary Table 9. Summary short-read samples available for genomes used in analysis and heterozygosity observed in missense SNPS.....                                                   | 4         |
| Supplementary Table 10. Summary of OC116 reads mapped to the haploid resolved genome assemblies (bAnaPla2.hap1 and bAnaPla2.hap2).....                                                       | 5         |
| Supplementary Figure 15. Alignment of OC116 sequences for <i>Anas platyrhynchos</i> demonstrating location of SAPs across 14 genomes.....                                                    | 6         |
| <b>Supplementary Note 3: Taxonomic identification of specimens at Tlajinga and Shubayqa....</b>                                                                                              | <b>7</b>  |
| Supplementary Table 11. Biomarkers for four duck groups identified by Codlin et al.....                                                                                                      | 8         |
| Supplementary Table 12. Summary of new taxonomic identification of eggshell samples from Shubayqa. Species in bold are considered the most likely.....                                       | 10        |
| Supplementary Figure 16. Summary of protein alignments and selected spectra of peptide fragmentation (MS2s) that support identifications of <i>Cygnus olor</i> and <i>Anser</i> ssp.....     | 11        |
| <b>Supplementary Note 4: Selection of reference proteins (queries).....</b>                                                                                                                  | <b>12</b> |
| Supplementary Table 13. List of proteins used as reference queries for annotation of genomes.....                                                                                            | 13        |
| Supplementary Figure 17. Alignment of select ovotransferrin sequences annotated using the TRFE_ANAPL ( <i>Anas platyrhynchos</i> ) and XP_040423237.1 ( <i>Cygnus olor</i> ) references..... | 13        |
| <b>Additional references.....</b>                                                                                                                                                            | <b>14</b> |
| <b>Description of supplementary data available on Zenodo.....</b>                                                                                                                            | <b>15</b> |
| <b>Annotation pipeline:.....</b>                                                                                                                                                             | <b>15</b> |
| Readme_Annotation.md.....                                                                                                                                                                    | 15        |
| queryseg.sh.....                                                                                                                                                                             | 15        |
| Codlin_et_al_Annotation_pipeline.sh.....                                                                                                                                                     | 15        |

|                                                     |           |
|-----------------------------------------------------|-----------|
| Queries.zip.....                                    | 15        |
| Complete dataset.zip.....                           | 15        |
| - Curated sequences.....                            | 15        |
| - Geneious format annotation files.....             | 15        |
| - Unmodified alignments of sequence fragments.....  | 15        |
| Dataset 1.zip.....                                  | 15        |
| Dataset 2.zip.....                                  | 15        |
| <b>Assessment of annotation quality.....</b>        | <b>16</b> |
| Annotation_RefSeq_alignments.zip.....               | 16        |
| <b>SRA analysis and variant calling.....</b>        | <b>16</b> |
| Aplat_SRA_mapped_variant_calling_OC116.zip.....     | 16        |
| - SRA_and_variant_calling_commands.md.....          | 16        |
| Aind_SRA_mapped_COL1a2.zip.....                     | 16        |
| <b>Annotation of non-Anatidae:.....</b>             | <b>16</b> |
| queries_non_Anatidae.zip.....                       | 16        |
| Non_anatidae_OC116.fasta.....                       | 16        |
| <b>Creation of phylogenetic trees.....</b>          | <b>16</b> |
| Trees.zip.....                                      | 16        |
| <b>R code for producing figures and tables.....</b> | <b>16</b> |
| Trees_fig1_fig3.Rmd.....                            | 16        |
| Annotation summary.Rmd.....                         | 16        |
| DistancesVariation_fig3_fig4.Rmd.....               | 17        |
| <b>Reanalysis of LC-MS/MS data using PEAKS.....</b> | <b>17</b> |
| Anatidae_DS2_SwissProtbird_validated.fasta.....     | 17        |

# Supplementary Text

## Supplementary Note 1: Assessment of annotation quality

We compared protein sequences from our study to proteins annotated by NCBI's RefSeq annotation pipeline: GCF\_015476345.1 (*Anas platyrhynchos*), GCF\_009819795.1 (*Aythya fuligula*), GCF\_009769625.2 (*Cygnus olor*), GCF\_013377495.2 (*Cygnus atratus*), and GCF\_011077185.1 (*Oxyura jamaicensis*). For most proteins, no, or minor differences were observed (Supplementary Table 6, see Supplementary Data). Minor differences include partial annotations or inclusion of segments in the RefSeq sequences that appear erroneous, often at the N or C termini. In many cases, annotation was likely similar across both pipelines, but erroneous segments were removed during our manual data curation.

Potentially meaningful differences were identified in three proteins: XCA1, XCA2 and COL1a2. For XCA1, *A. platyrhynchos* annotations varied at amino acids 120-122 (ungapped), where the three-letter sequence was "LPX" in the RefSeq sequence and "-PQ" in the sequence annotated by our pipeline. In contrast, the protein sequence was annotated as "LPR" in seven of eight other *A. platyrhynchos* specimens. This implies that this difference is likely an isolated incident, such as one caused by sequencing or assembly error or that annotations were performed on different versions of the assembled genome.

For COL1a2, amino acids at positions 25-28 varied from the RefSeq annotations for *A. platyrhynchos* and *A. fuligula* ("VSE" to "LFQ"), and at 24-34 for *C. atratus* and *C. olor* ("HVSEAPAGRR" to "RKLLSACSWP") and *O. jamaicensis* ("HVSEAPAGRR" to "RKLLSSVVVQ"). These variants are internally consistent within the rest of the COL1a2 dataset, with most ducks presenting the LFQ variant, and geese, swans and stiff-tailed ducks presenting the longer variant.

For XCA2, a three amino acid insertion ("ECR") at position 24 in *C. atratus* deviates from the RefSeq sequence. In the XCA2 dataset, this insertion is found consistently in geese, swans and whistling ducks. Moreover, the insertion means that this section of the protein aligns more closely with other Anatidae species, as it would otherwise be a gap in the sequence.

Given the consistency in COL1a2 and XCA2 deviations from the RefSeq sequences, there is insufficient evidence to indicate they are erroneous annotations. Moreover, as they are located near the N-terminus, these parts of the sequences are unlikely to be incorporated into the final protein product. Based on this, we decided to not trim or modify these portions of the sequences.

## Supplementary Note 2: Comparison of annotated *Anas platyrhynchos* sequences and SRA support for OC116 SAPs

A total of 19 SAPs were identified across 14 *Anas platyrhynchos* sequences for OC116 (Supplementary Figure 15). Nine Sequence Read Archives (SRA) were available for seven of the genomes to evaluate the support for these SAPs (Supplementary Table 10). Of the 19 SAPs, 14 were supported by variant calling analysis and 4 SAPs (at 449, 462, 487, and 580) were not evaluated because they derived from genomes not included in the SRA data for variant calling. One SAP at position 133 was not well supported by variant calling, as it had low read coverage (n=4) in the sample with this variant. However, it is likely that this variant does exist in the *Anas platyrhynchos* population given that it was also observed in two other sequences where SRAs were not available for variant calling (Supplementary Figure 15). One mutation supported by variant calling (at 387) was observed only in the SRA data as the annotated genome from this sequence was assembled from multiple individuals.

## Supplementary Table 9. Summary short-read samples available for genomes used in analysis and heterozygosity observed in missense SNPS.

SRR11915221 and SRR11910010 represent separate individuals contributing to a pooled genome assembly, while SRR18178819 and SRR18186809 represent separate runs of a single sample.

| SRR ID       | Sample tissue | Biosample number | Instrument            | Associated Genome | Associated genome notes           | Het <sup>1</sup> |
|--------------|---------------|------------------|-----------------------|-------------------|-----------------------------------|------------------|
| SRR25181664* | male muscle   | SAMN36329575     | Illumina HiSeq X      | GCA_030704485.1   | Monoisolate; male muscle          | X*               |
| SRR11915221  | female liver  | SAMN15090836     | Illumina HiSeq X      | GCA_015476345.1   | Pooled individuals and tissues    | N                |
| SRR11910010  | male muscle   | SAMN15090885     | Illumina HiSeq X      |                   |                                   | N                |
| SRR12316517  | female muscle | SAMN15638146     | Illumina HiSeq 2000   | GCA_017639285.1   | Pooled females and tissues        | N                |
| SRR13051620  | female muscle | SAMN15638092     | Illumina HiSeq 2000   | GCA_017639305.1   | Pooled females and tissues        | Y                |
| SRR13076878  | female muscle | SAMN15638089     | Illumina HiSeq 2000   | GCA_008746955.3   | Pooled females and tissues        | Y                |
| SRR18178819  | male blood    | SAMN24405268     | Illumina HiSeq 2500   | GCA_037218355.1   | Monoisolate; male blood and liver | Y                |
| SRR18186809  |               |                  | Illumina HiSeq 2500   |                   |                                   |                  |
| SRR26345462  | female blood  | SAMN36468273     | Illumina NextSeq 2000 | GCA_032352815.1   | Monoisolate; female blood         | N                |

\*sample SRR25181664 was removed from analysis following the unexplained presence of triploid allele variation in the OC116 gene.

Het<sup>1</sup>: Heterozygosity observed

**Supplementary Table 10. Summary of OC116 reads mapped to the haploid resolved genome assemblies (bAnaPla2.hap1 and bAnaPla2.hap2).**

Ambiguous mapping is indicated by mapping quality scores (MQ) of 3 or lower and implies that a read maps to more than one location on the genome

| <u>SRA ID</u> | <b>Total OC116 reads</b> |              | <b># reads with ambiguous mappings</b> |              | <b>% ambiguous mappings</b> |              |
|---------------|--------------------------|--------------|----------------------------------------|--------------|-----------------------------|--------------|
|               | <u>Hap 1</u>             | <u>Hap 2</u> | <u>Hap 1</u>                           | <u>Hap 2</u> | <u>Hap 1</u>                | <u>Hap 2</u> |
| SRR11910010   | 3788                     | 3788         | 120                                    | 137          | 3%                          | 4%           |
| SRR11915221   | 3068                     | 3069         | 2                                      | 7            | 0%                          | 0%           |
| SRR12316517   | 916                      | 911          | 23                                     | 25           | 3%                          | 3%           |
| SRR13051620   | 1892                     | 1878         | 110                                    | 101          | 6%                          | 5%           |
| SRR13076878   | 2424                     | 2419         | 69                                     | 61           | 3%                          | 3%           |
| SRR18178819   | 714                      | 714          | 5                                      | 2            | 1%                          | 0%           |
| SRR18186809   | 703                      | 703          | 0                                      | 0            | 0%                          | 0%           |
| SRR26345462   | 97                       | 97           | 0                                      | 0            | 0%                          | 0%           |

**Supplementary Figure 15. Alignment of OC116 sequences for *Anas platyrhynchos* demonstrating location of SAPs across 14 genomes. SAPs with no confirmation through variant calling are highlighted in red. One SAP supported by variant calling is not observed in the alignment, but its position is indicated in green**

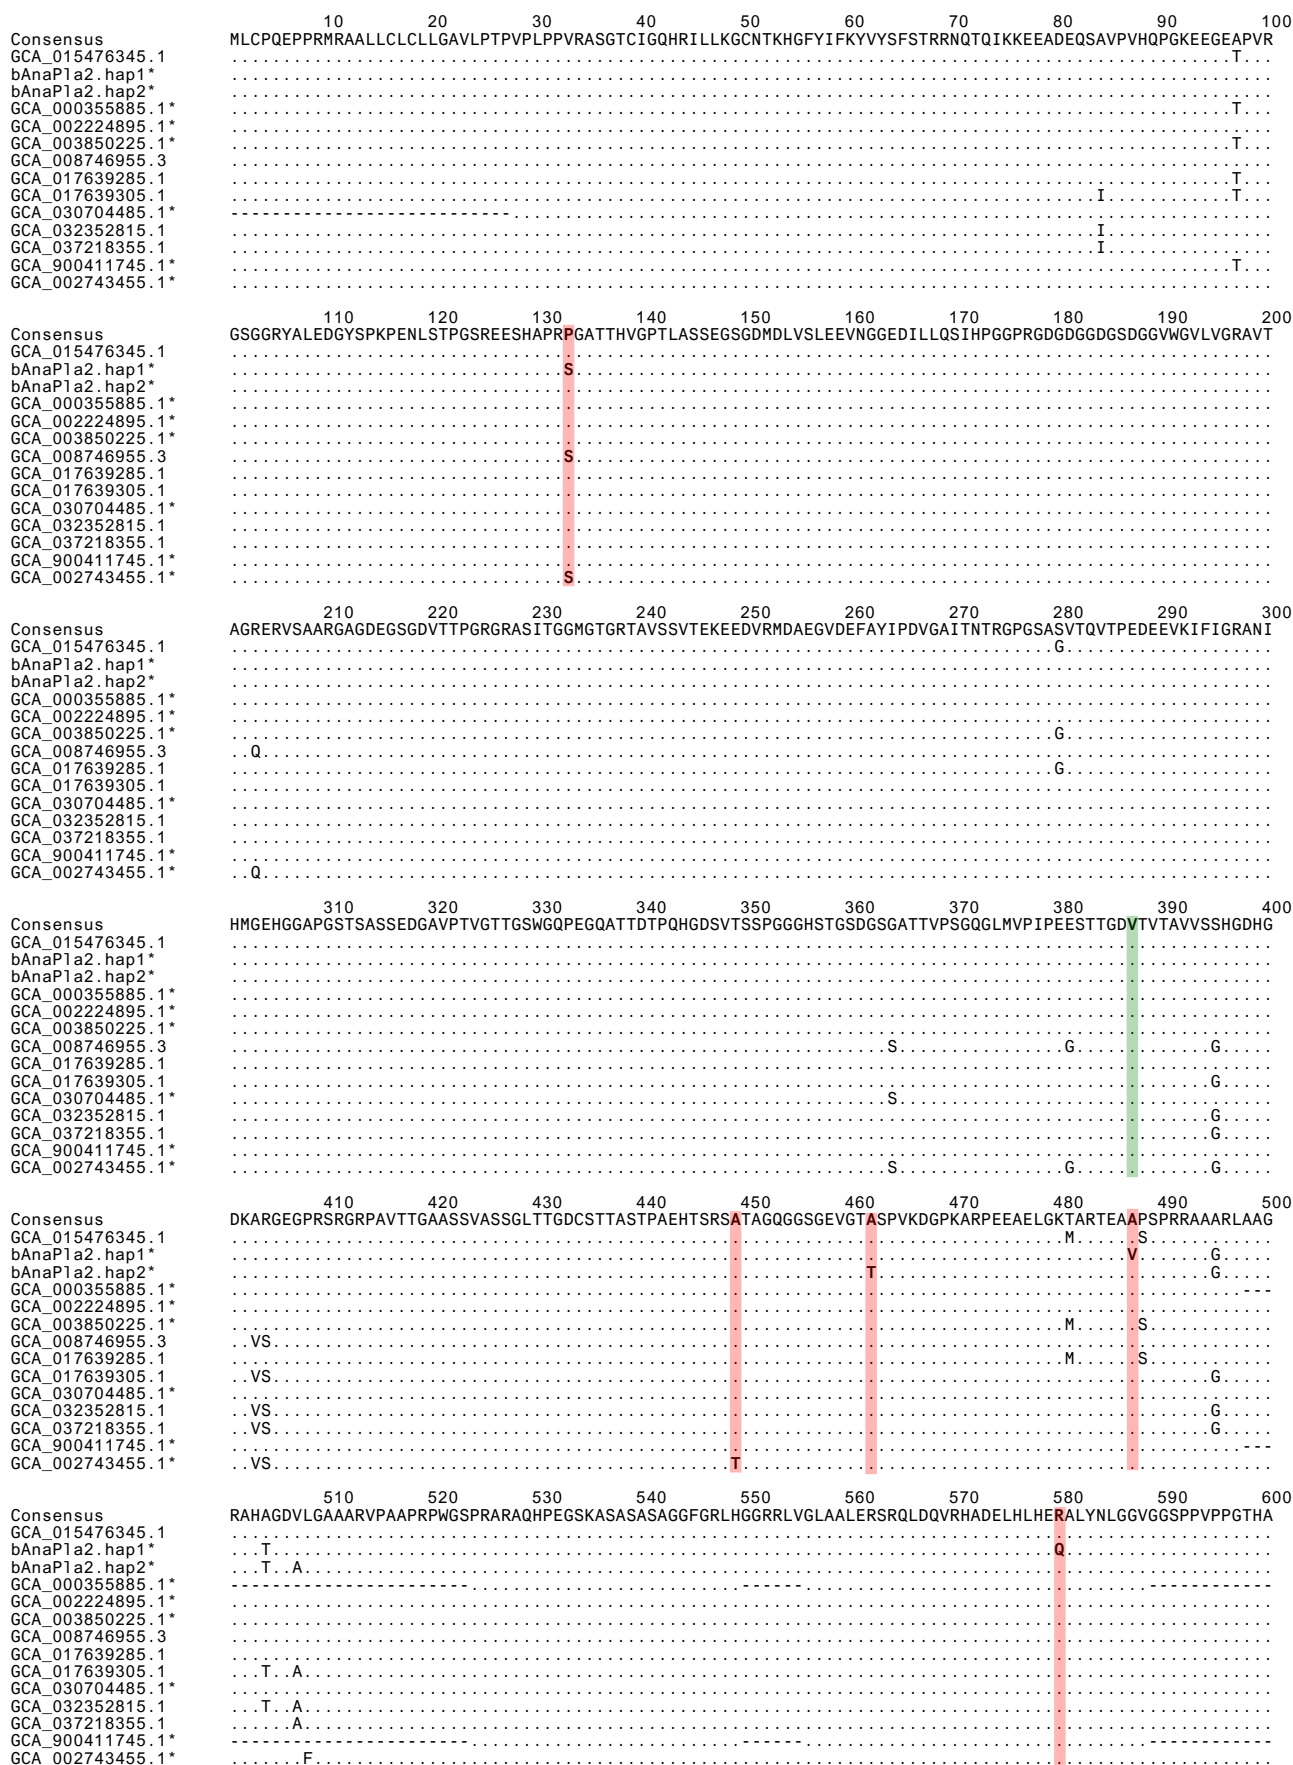

### Supplementary Note 3: Taxonomic identification of specimens at Tlajinga and Shubayqa

The annotated protein sequences comprising the reference dataset (dataset 2) were applied to previously analysed bone and eggshell samples to assess the improvement in taxonomic resolution with the new dataset. We use  $n^g$ ,  $n^{sp}$ , and  $n^i$  to refer to the number of distinct genera, species and individual sequences respectively. Protein-based identification techniques usually involve one or two types of mass spectrometry. Matrix-assisted laser desorption/ionisation time-of-flight (MALDI-TOF) mass spectrometry is a cheap yet relatively low resolution technique that provides, peptide mass-fingerprint, a spectrum of peaks characteristic of the mass of peptides within a sample. In contrast, tandem mass spectrometry techniques (MS/MS) provide higher resolution as they not only measure the mass of a peptide, but fragment it further to reconstruct the sequence of amino acids in the peptide.

#### Anatidae at Tlajinga, Teotihuacan

Our estimates of what might have been present are conservative and account for the fact that our current information about species distribution in Mexico mostly derives from studies that occurred after major infilling of the large and diverse lake system that before European contact was a major wintering ground for North American waterfowl<sup>1</sup>. Therefore, we consider it possible that any species with a current distribution in or near Mexico are potential candidates, but provide an estimate for the most likely species based on commonly occurring species in the region today. Of 173 species in Anatidae (as listed in the HBW and BirdLife International 2024 checklist<sup>2</sup> we have the COL1a2 sequence for 111 species providing excellent coverage of species found in this region.

Codlin et al.<sup>3</sup> presented LC-MS/MS data to support multiple MALDI-TOF biomarkers (i.e. peptide sequences and mass-to-charge ratios) which were observed to distinguish four groups of specimens identified to Anatidae (Supplementary Table 11). In their study, group 2 matched peptide sequences found in *Anas platyrhynchos* and group 4 matched peptide sequences found in *Oxyura jamaicensis*. The filtered protein and peptides from our PEAKS 11 analysis of the four specimens from these groups supported the peptide sequences and masses identified by Codlin et al.<sup>3</sup>.

Anatidae group 1 made up 11 % of the Anatidae identified at Tlajinga, Teotihuacan. The combination of peptides that peak at  $m/z$  2777.3 and 2985.5 were found only in species from the *Mareca* genus ( $n^{sp}=5$ ), and were observed in all individuals ( $n^i=7$ ). Considering the modern distributions of *Mareca*, only *M. strepera* and *M. americana* are likely to have been present in Central Mexico in the past<sup>4</sup> (Supplementary Table 12). While there is also a peptide found in many species with a theoretical mass of 2777.3, this peptide does not ionize well using the MALDI-TOF and is not present in the spectra. The LC-MS/MS data for peptides with this mass confirms that  $m/z$  2777.3 derives from the peptide sequence unique to *Mareca*.

**Supplementary Table 11. - Biomarkers for four duck groups identified by Codlin et al<sup>3</sup>.**

| Duck group                 | ID    | [M+H] <sup>+</sup> | Peptide name   | Peptide sequence                  |
|----------------------------|-------|--------------------|----------------|-----------------------------------|
| Anatidae 1                 | MC148 | 2777.3             | COL1a2 454-483 | GETGPAGPPGFQGLPGPSGPAGEAGKPGER    |
| Anatidae 1                 | MC148 | 2985.5             | COL1a2 757-789 | GPSGESGAPGPPGTPGPQGILGAPGILGLPGSR |
| Anatidae 1                 | MC148 | 1632.8             | COL1a2 889-906 | GDPGPAGHVGPAGAFGPR                |
| Anatidae 2                 | MC123 | 2804.3             | COL1a2 454-483 | GEQGPAGPPGFQGLPGPSGPAGEAGKPGER    |
| Anatidae 2                 | MC123 | 2969.5             | COL1a2 757-789 | GPSGEAGAPGPPGTPGPQGILGAPGILGLPGSR |
| Anatidae 2                 | MC123 | 1632.8             | COL1a2 889-906 | GDPGPAGHVGPAGAFGPR                |
| Anatidae 3                 | MC182 | 2804.3             | COL1a2 454-483 | GEQGPAGPPGFQGLPGPSGPAGEAGKPGER    |
| Anatidae 3                 | MC182 | 2984.5             | COL1a2 757-789 | GPSGEAGAAGPPGTPGPQGILGAPGILGLPGSR |
| Anatidae 3                 | MC182 | 1632.8             | COL1a2 889-906 | GDPGPAGHVGPAGAFGPR                |
| <i>Oxyura</i> (Anatidae 4) | MC171 | 2804.3             | COL1a2 454-483 | GEQGPAGPPGFQGLPGPSGPAGEAGKPGER    |
| <i>Oxyura</i> (Anatidae 4) | MC171 | 2927.5             | COL1a2 757-789 | GPSGEAGAAGPPGTPGPQGILGAPGILGLPGSR |
| <i>Oxyura</i> (Anatidae 4) | MC171 | 1660.8             | COL1a2 889-906 | GDPGPVGHVGPAGAFGPR                |

Anatidae group 2 was the largest group in the Anatidae assemblage (56%) and the combination of biomarkers representative of this group ( $m/z$  1632.8, 2804.3 and 2969.5), are found in multiple genera ( $n^s=28$ ). The filtered results of the PEAKS analysis of the LC-MS/MS data identified close matches in COL1a2 to species in two groups visible in the COL1a2 tree (Supplementary Figure 5), one containing *Amazonetta* ( $n^s=1$ ), *Anas* ( $n^s=10$ ), *Lophonetta* ( $n^s=1$ ), *Spatula* ( $n^s=7$ ), *Speculanus* ( $n^s=1$ ) and *Tachyeres* ( $n^s=3$ ), and the second containing *Aythya* ( $n^s=8$ ), *Marmonetta* ( $n^s=1$ ), and *Netta* ( $n^s=3$ ). These two groups can be distinguished by a T to A SAP at position 576, but this portion of the COL1a2 sequence was not recovered by the LC-MS/MS analysis. Of these species, those that could have lived or over-wintered in Central Mexico<sup>4</sup> include *Anas diazi*, *A. platyrhynchos*, *A. fulvigula*, *A. crecca* (COL1a2 sequence unknown), *Spatula discors*, *S. cyanoptera*, *S. clypeata*, *Aythya valisineri*, *Ay. americana*, *Ay. collaris*, *Ay. marila* and *Netta erythrophthalma*. Given the broad range of species in this group, the size and shape of bones of these specimens could be employed to further narrow down this identification.

In group 3 (18%), a combination of markers was observed at  $m/z$  2804.3, 2984.5 and 1632.8. The  $m/z$  2984.5 peak is unique within dataset 2 (i.e. no other tryptic COL1a1 or COL1a2 peptide has this mass) and this peptide is only found in pintails: *Anas acuta* and *A. bahamensis*. One SAP separates these species from other *Anas* spp., but given that it is present in four pintail genomes, and no other species, we consider the SAP as a marker for pintail taxa. A third pintail species, *A. georgica*, does not present this SAP, but given that only one individual was sequenced, we cannot rule out that this SAP may be present in the *A. georgica* population. However, only *Anas acuta* visits this region today<sup>4</sup> and is therefore the best candidate for taxonomic identification.

Anatidae 4 was tentatively identified as *Oxyura jamaicensis* by Codlin et al.<sup>3</sup>, as the markers matched the theoretical peptides from an annotated *Oxyura jamaicensis* genome and proteins from two reference specimens available for this species. *Oxyura* ( $n^s=2$ ,  $n^i=2$ ) is the only genus with the peptides or masses at  $m/z$  1660.8, 2927.5, and 2804.3, and although *Nomonyx dominicus* ( $n^i=1$ ) has an identical pairwise identity, it is missing coverage of the sequence across two of these peptides. Of the two *Oxyura*, only *O. jamaicensis* would have been present in Mexico in the past and is common today, while *N. dominicus* could potentially have been present in the past.

In three out of four of these duck groups, taxonomic identification can be made based on MALDI-TOF MS data alone, while group 2 requires multiple other biomarkers best observed with LC-MS/MS data.



## Anatidae at Shubayqa, Jordan

We also applied our new dataset to improve taxonomic resolution of eggshells recovered from Shubayqa, a Late Pleistocene to Early Holocene transition site in Eastern Jordan. Yeomans et al.<sup>5</sup> suggested that most eggshell samples belong to a species of duck for which protein sequences were not available. They also identified evidence of goose (*Anser/Branta*), and one swan (*Cygnus*).

With the larger dataset, we can confirm that the unidentified duck with a distinctive marker at  $m/z$  2461.2 belonged to a species not present in the original database. *Tadorna* ( $n^i=4$ ), *Alopochen* ( $n^i=1$ ) and *Plectropterus* ( $n^i=1$ ) all have the SAP resulting in the marker at  $m/z$  2461.2 and cannot be distinguished by MALDI-MS. We observed multiple SAPs in the LC-MS/MS data for XCA1, XCA2 and OC116 that rule out *Plectropterus*. *Alopochen* is considered an introduced species in Jordan, and two species of *Tadorna* are present. While it is likely that the breeding and distribution ranges of *Alopochen* and *Tadorna ferruginea* were different during the Late Pleistocene, the most likely species to have been breeding at Shubayqa is *Tadorna tadorna*, which occasionally breeds in the region today<sup>6</sup>.

The LC-MS/MS data for the sample previously identified at *Cygnus* sp. matched most closely to protein sequences found in *Cygnus olor*. *Cygnus olor* diverged from other swans found in the northern hemisphere, *C. cygnus*, *C. columbianus* and *C. buccinator* around 7.5 mya (according to Sun et al.<sup>7</sup>), which is reflected as SAP differences between these species in every protein in our study with the exception of Ovalbumin (see Supplementary Figures 1-13). While only one *C. olor* individual ( $n^i=2$ ) is present in our database, there are seven individuals in total for this genus ( $n^p=6$ ,  $n^i=8$ ). The identification of multiple SAPs in the archaeological sample that match the sequences for *C. olor*, rather than the other potential species, leads us to conclude that the eggshell should be identified as *C. olor* (Supplementary Figure 16). Today, all *Cygnus* species, including *C. olor*, are considered rare or accidental visitors to Jordan. According to Hansson et al.<sup>8</sup>, the first published and confirmed sighting of *Cygnus olor* in Jordan was in January '98, four swans in the Azraq wetland. The archaeological eggshell fragments present clear evidence that mute swans breed in Jordan at the end of the Pleistocene and start of the Holocene.

Multiple SAPs in both XCA1 and XCA2 proteins support the separation of *Anser* and *Branta* geese (Supplementary Figure 16). The goose specimen from Shubayqa displays amino acid sequences found in the *Anser* genus, although cannot be identified more precisely until interspecies variability identified in OC116 can be confirmed. *Anser anser* is a winter visitor to Jordan today, while *A. albifrons* and *A. erythropus* are rare or accidental visitors<sup>6</sup>. It is therefore most likely that *Anser anser* was breeding in Jordan during the late Pleistocene.

**Supplementary Table 12. Summary of new taxonomic identification of eggshell samples from Shubayqa. Species in bold are considered the most likely.**

| Tlajinga, Teotihuacan, Mexico: COL1a2                                 |                                                                     |                                                                                                                                                                                                                                                       |
|-----------------------------------------------------------------------|---------------------------------------------------------------------|-------------------------------------------------------------------------------------------------------------------------------------------------------------------------------------------------------------------------------------------------------|
| Previous identification (representative specimen)                     | New taxonomic identification                                        | Possible species present                                                                                                                                                                                                                              |
| Anatidae Group 1 (MC148)                                              | <i>Mareca</i>                                                       | <i>M. strepera</i> , <i>M. americana</i>                                                                                                                                                                                                              |
| Anatidae Group 2 (MC123): Matched <i>Anas platyrhynchos</i> reference | <i>Anatini</i><br><i>Aythya</i>                                     | <i>Anas diazi</i> , <i>A. platyrhynchos</i> , <i>A. fulvigula</i> , <i>A. crecca</i> ; <i>Spatula discors</i> , <i>S. cyanoptera</i> , <i>S. clypeata</i> ; <i>Aythya valisineri</i> , <i>Ay. americana</i> , <i>Ay. collaris</i> , <i>Ay. marila</i> |
| Anatidae Group 3 (MC182)                                              | <i>Anas acuta</i><br><i>Anas bahamensis</i><br><i>Anas georgica</i> | <b><i>Anas acuta</i></b> , <i>A. bahamensis</i>                                                                                                                                                                                                       |
| Anatidae Group 4 (MC171): Matched <i>Oxyura jamaicensis</i> reference | <i>Oxyura</i>                                                       | <i>Oxyura jamaicensis</i>                                                                                                                                                                                                                             |
| Shubayqa, Jordan: XCA1, XCA2, OC116 & BPI-fold-B4                     |                                                                     |                                                                                                                                                                                                                                                       |
| Previous identification (representative specimen)                     | New taxonomic identification                                        | Possible species breeding                                                                                                                                                                                                                             |
| Anatidae (PALTO 114D)                                                 | <i>Tadorna</i><br><i>Alopochen</i>                                  | <b><i>Tadorna tadorna</i></b> , <b><i>T. ferruginea</i></b><br><i>Alopochen aegyptiaca</i>                                                                                                                                                            |
| Anatidae (PALTO 119D)                                                 | <i>Tadorna</i><br><i>Alopochen</i>                                  | <b><i>Tadorna tadorna</i></b> , <b><i>T. ferruginea</i></b><br><i>Alopochen aegyptiaca</i>                                                                                                                                                            |
| Cygnus sp (PALTO 689)                                                 | <i>Cygnus olor</i>                                                  | <b><i>Cygnus olor</i></b>                                                                                                                                                                                                                             |
| Anser/Branta (PALTO 693)                                              | <i>Anser</i>                                                        | <b><i>Anser anser</i></b> , <i>A. albifrons</i> , <i>A. erythropus</i>                                                                                                                                                                                |

Supplementary Figure 16. Summary of protein alignments and example spectra of peptide fragmentation (MS2s) that support identifications of *Cygnus olor* and *Anser ssp.*

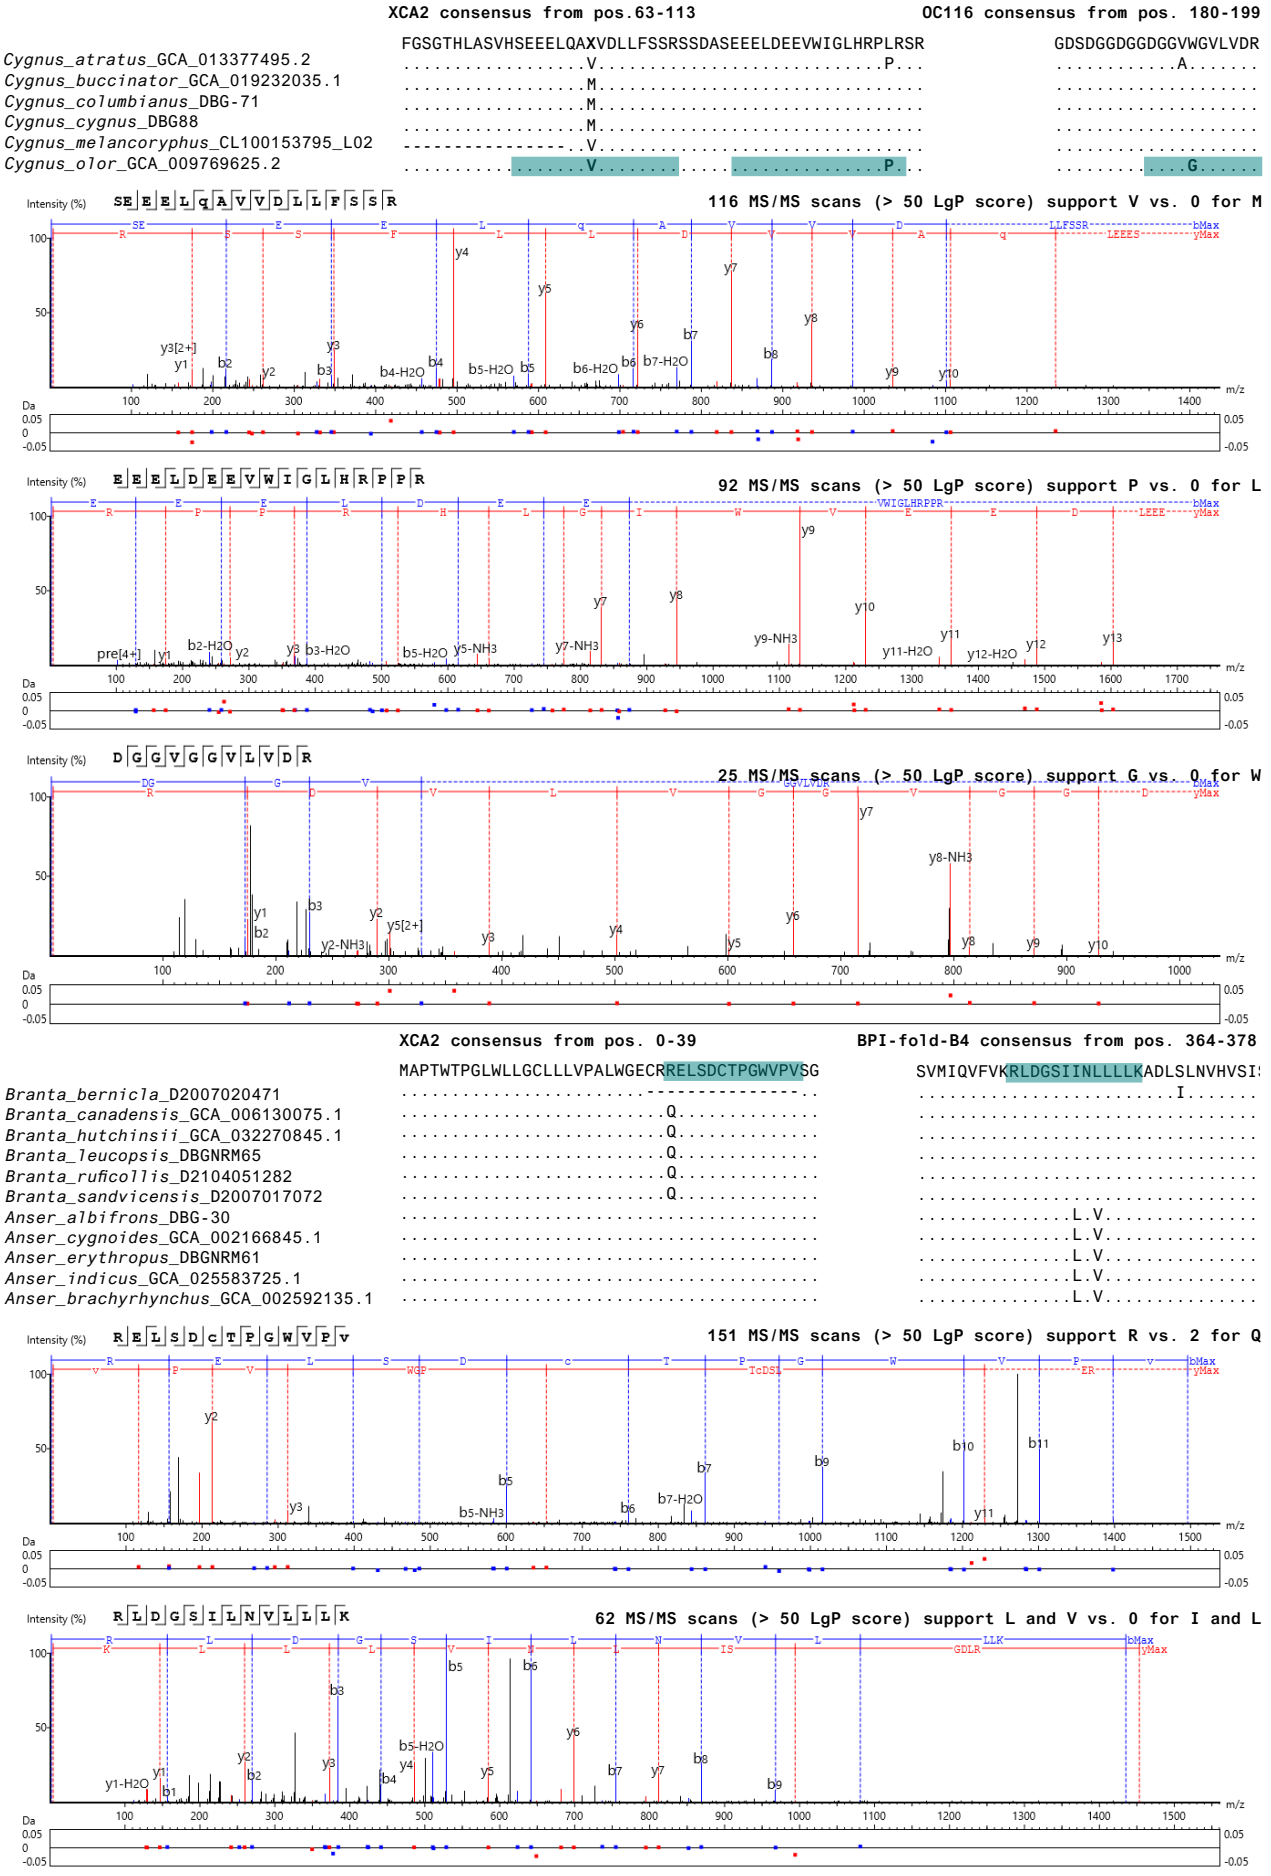

## Supplementary Note 4: Selection of reference proteins (queries)

For more variable proteins, using reference proteins from closely related species, in this case, from the same family, usually provided better coverage and accuracy of retrieved sequences than sequences from less related taxa. In other cases, we found that using two reference sequences, one closely related and one less closely related, such as *Gallus gallus*, and then merging the resulting annotations prior to the creation of the consensus sequence improved annotated sequences over using a single reference. Where possible, we used reviewed SWISS-PROT proteins<sup>9</sup> or RefSeq annotated proteins<sup>10</sup> for *Anas platyrhynchos* genome (GCF\_015476345.1). Often, however these annotations were missing or inconsistent with other annotations from closely related species, and so sequences matching a wider consensus were chosen.

Reference sequences for collagen type 1 (COL1a1 and COL1a2), c-type lectins (XCA1 and XCA2), Ovocleidin 116 (OC116), albumin, BPI fold containing family B member 4 (BPI-fold-B4, BPIFB4), clusterin, lactadherin, ovalbumin, ovocalyxin32, ovomucoid, and ovotransferrin are listed in Supplementary Table 13.

COL1a1 was originally annotated using XP\_035424404.1 (*Cygnus atratus*) as the reference sequence. It was noted, however, that average coverage of the resulting proteins was poorer than during preliminary testing using NP\_001383551.1 (*Gallus gallus*). The cause of this is unclear, given the highly conserved nature of COL1a1. We additionally ran the annotation pipeline using the *Gallus* reference for any genome where the initial consensus sequence was less than about 70% coverage, and the results of both annotation runs were aligned together to create the consensus sequence. The resulting merged dataset had higher coverage of the protein overall than either dataset individually. For the same reason, the clusterin protein was also annotated using two reference proteins AAD17257.1 (*Gallus gallus*) and XP\_032041356.1 (*Aythya fuligula*) and the results merged as above.

During the first round of annotations, the reviewed SWISS-PROT protein P56410.1 TRFE\_ANAPL for *Anas platyrhynchos* was chosen as the target reference for ovotransferrin. However, when comparing annotations based on this protein against the RefSeq annotations, we observed that proteins for *A. platyrhynchos* and many other species diverged significantly from the RefSeq proteins (Supplementary Figure 17). Annotation of ovotransferrin was instead run using *Cygnus olor* XP\_040423237.1, which while longer than the accepted protein length<sup>11,12</sup>, included the complete ovotransferrin protein.

| Accession ID   | Protein        | Description                                | Species                   |
|----------------|----------------|--------------------------------------------|---------------------------|
| XP_035424404.1 | COL1a1         | collagen alpha-1(I) chain isoform X3       | <i>Cygnus atratus</i>     |
| NP_001383551.1 | COL1a1         | COL1A1                                     | <i>Gallus gallus</i>      |
| XP_038029841.1 | COL1a2         | collagen alpha-2(I) chain isoform X2       | <i>Anas platyrhynchos</i> |
| XP_066846641.1 | XCA1           | rheacalcin-1-like                          | <i>Anser cygnoides</i>    |
| XP_038024161.1 | XCA2           | struthiocalcin-2-like                      | <i>Anas platyrhynchos</i> |
| XP_038034818.1 | OC116          | ovocleidin-116 isoform X1                  | <i>Anas platyrhynchos</i> |
| NP_001297323.1 | Albumin        | serum albumin precursor                    | <i>Anas platyrhynchos</i> |
| XP_021122208.1 | BPI-fold-B4    | BPI fold-containing family B member 4      | <i>Anas platyrhynchos</i> |
| XP_032041356.1 | Clusterin      | clusterin                                  | <i>Aythya fuligula</i>    |
| AAD17257.1     | Clusterin      | clusterin                                  | <i>Gallus gallus</i>      |
| XP_027321929.1 | Lactadherin    | lactadherin isoform X1                     | <i>Anas platyrhynchos</i> |
| NP_001298098.1 | Ovalbumin      | ovalbumin                                  | <i>Anas platyrhynchos</i> |
| XP_035422339.1 | Ovocalyxin 32  | retinoic acid receptor responder protein 1 | <i>Cygnus atratus</i>     |
| XP_035415626.1 | Ovomucoid      | ovomucoid                                  | <i>Cygnus atratus</i>     |
| XP_040423237.1 | Ovotransferrin | ovotransferrin                             | <i>Cygnus olor</i>        |

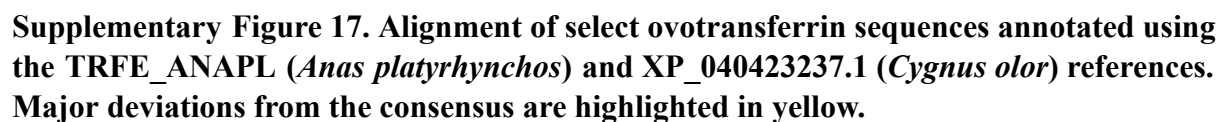

## Additional references

1. Alcocer, J. & Williams, W. D. Historical and recent changes in Lake Texcoco, a saline lake in Mexico. *International Journal of Salt Lake Research* **5**, 45–61 (1996).
2. HBW and BirdLife International. *Handbook of the Birds of the World and BirdLife International Digital Checklist of the Birds of the World. Version 8.1.* (2024).
3. Codlin, M. C., Douka, K. & Richter, K. K. An application of zooms to identify archaeological avian fauna from Teotihuacan, Mexico. *Journal of Archaeological Science* **148**, 105692 (2022).
4. *Birds of the World.* (Cornell Laboratory of Ornithology, Ithaca, NY, USA, 2022).
5. Yeomans, L., Codlin, M. C., Mazzucato, C., Dal Bello, F. & Demarchi, B. Waterfowl Eggshell Refines Palaeoenvironmental Reconstruction and Supports Multi-species Niche Construction at the Pleistocene-Holocene Transition in the Levant. *J Archaeol Method Theory* (2024) doi:10.1007/s10816-024-09641-0.
6. Andrews, I. J. *The Birds of the Hashemite Kingdom of Jordan.* (1995).
7. Sun, Z. *et al.* Rapid and recent diversification patterns in Anseriformes birds: Inferred from molecular phylogeny and diversification analyses. *PLoS One* **12**, e0184529 (2017).
8. Hansson, E., Magnusson, A. & Eriksson, P. The first Mute Swan *Cygnus olor* and Radde's Accentor *Prunella ocularis* in. *Sandgrouse* **20**, 46–47 (1998).
9. UniProt Consortium. UniProt: the Universal Protein Knowledgebase in 2025. *Nucleic Acids Res* **53**, D609–D617 (2025).
10. O'Leary, N. A. *et al.* Reference sequence (RefSeq) database at NCBI: current status, taxonomic expansion, and functional annotation. *Nucleic Acids Res* **44**, D733–45 (2016).
11. Wu, J. & Acero-Lopez, A. Ovotransferrin: Structure, bioactivities, and preparation. *Food Research International* **46**, 480–487 (2012).
12. Williams, J., Elleman, T. C., Kingston, I. B., Wilkins, A. G. & Kuhn, K. A. The Primary Structure of Hen Ovotransferrin. *European Journal of Biochemistry* **122**, 297–303 (1982).

# Description of supplementary data available on Zenodo

All files will be made publicly available on Zenodo (10.5281/zenodo.14676027) upon publication.

## Annotation pipeline:

### Readme\_Annotation.md

- Provides notes for setup to run the annotation pipeline

### queryseg.sh

- Bash script which creates segments of queries prior to running Annotation pipeline

### Codlin\_et\_al\_Annotation\_pipeline.sh

- Bash script for the annotation pipeline to extract protein sequences from genomes

### Queries.zip

- This contains 15 .fasta files, each containing a single protein sequence used as a reference query for annotating Anatidae proteins. Files have been named with protein\_Genus.fasta for use in the annotation pipeline indicating the genus related to the reference protein.

### Complete dataset.zip

- *Curated sequences*
  - 13 .fasta file alignments for each protein, containing complete and partial curated sequences, all replicates.
  - Each sequence in this file is named with a code designating the first three letters of the Order and Family of the species (OrdFam code), followed by the species name and genome accession ID, and finally the name of the protein used as the query and a “consensus” if the sequence was derived from alignment of multiple fragments. i.e. AnsAna\_Anas\_acuta\_GCA\_963932075.Albumin\_Anas.consensus
- *Geneious format annotation files*
  - 13 .geneious file alignments for each protein, containing complete and partial curated sequences, all replicates. All modifications made during curation are recorded using Geneious Prime 2024.0 as annotations. These files can be viewed using the free version of Geneious available at (<https://www.geneious.com>)
- *Unmodified alignments of sequence fragments*
  - 13 .fasta file alignments for each protein containing bulk alignment of all annotated proteins and protein segments created by annotation pipeline. No modifications were made to these sequences except alignment. This file was used to evaluate sequences during curation and identify erroneous SAPs. Sequences are named with the OrdFam code, the species name, genome accession ID, the query protein, and the annotation information indicating scaffolds and locations from the genome where the protein sequences were extracted from.

### Dataset 1.zip

- 13 .fasta file alignments for each protein, containing all curated sequences which were at least 70% complete
- Sequence names have been modified slightly compared to the complete curated sequences alignment. Each sequence is named with the OrdFam code, the species name, genome accession ID, the protein and “curated\_70”

### Dataset 2.zip

- 13 .fasta file alignments for each protein, containing both partial and complete curated sequences with redundancy removed at the species level.

## Assessment of annotation quality

### Annotation\_RefSeq\_alignments.zip

- Contains 13 aligned fasta files comparing proteins annotated by NCBI's pipeline for five Anatidae RefSeq genomes, and the sequences produced in this study for the same genomes.

## SRA analysis and variant calling

### Aplat\_SRA\_mapped\_variant\_calling\_OC116.zip

- *SRA\_and\_variant\_calling\_commands.md*
  - Contains chunks of command line code used to create files in this .zip folder, including mapping *Anas platyrhynchos* SRAs to the OC116 gene, examining mapping quality as a marker of gene duplication and performing variant calling.
- 8 .bam files (and .bai index files) of *Anas platyrhynchos* SRAs mapped to the *Anas platyrhynchos* gene for OC116. These are labelled with the SRA ID and the filename of the gene used for alignment i.e. SRRXXXXX.NC\_051775.1\_OC116\_gene.bam (and .bai).
- NC\_051775.1\_OC116\_gene.fasta is the OC116 gene used for alignment of reads.
- Aplat\_db.filtered.maf0.05.DP10.recode.vcf is the final combined variant calling file which incorporates the results from all 8 SRA files.

### Aind\_SRA\_mapped\_COL1a2.zip

- Contains one .bam file (and .bai index file) for the *Anser indicus* SRA mapped to the COL1a2 gene for *Anser cygnoides*. This is labelled with the SRA ID and the filename of the gene used for alignment i.e. SRR19551126.Anser\_cygnoides\_NC\_088874.1\_COL1a2.bam
- Anser\_cygnoides\_NC\_088874.1\_COL1a2.fasta is the COL1a2 gene used for alignment of reads.

## Annotation of non-Anatidae:

### queries\_non\_Anatidae.zip

- This contains 15 .fasta files, each containing a single protein sequence used as a reference query for annotating non-Anatidae proteins. Files have been named with protein\_Genus.fasta for use in the annotation pipeline indicating the genus related to the reference protein.

### Non\_anatidae\_OC116.fasta

- Alignment of OC116 protein sequences annotated from non Anatidae taxa

## Creation of phylogenetic trees

### Trees.zip

- This file contains file IQTREE outputs from constructing phylogenetic trees from individual proteins and the concatenated proteins.

## R code for producing figures and tables

### Trees\_fig1\_fig2.Rmd

- R markdown notebook containing code used for production of base files for concatenated tree (Figure 1), individual trees showing only *Anas*, *Mareca* and *Spatula* used to make Figure 2, the full trees for each protein (Supplementary Figures 1-13) and the concatenated tree with full labels (Supplementary Figure 14).

### Annotation summary.Rmd

- R markdown notebook file containing code used to create a summary of annotations in Dataset 1, Dataset 2 and the complete dataset by species (Supplementary Table 2).

### DistancesVariation\_fig3\_fig4.Rmd



- R markdown notebook file containing code for pairwise distance analysis of protein sequences from Dataset 1, and for creating base files for Figures 3-4.

### **Reanalysis of LC-MS/MS data using PEAKS**

#### **Anatidae\_DS2\_SwissProtbird\_validated.fasta**

- Fasta file used as PEAK11 search database, include sequences from Dataset 2 alongside all bird proteins downloaded from SwissProt on 01/08/24
