# Supplementary material for: New avian protein sequences improve resolution of palaeoproteomic approaches to taxonomic identification &amp; reveal widespread intraspecies variability
Source: Research Square preprint supplement (doi:10.21203/rs.3.rs-5880462/v1), 2025-02-12
Supplement: Supplementary file 1 [file 4696373e64cbc7106cd314bb.xlsx]

## Sheet: ST1 Genome database
Supplementary Table 1. List of genome accessions, source and species of Anatidae included in the study. Genomes downloaded from the National Center for Biotechnology Information (NCBI) https://www.ncbi.nlm.nih.gov/datasets/genome, the Bird 10,000 Genomes Project (B10K) https://b10k.com/index/index/species.html and the Vertebrate Genome Project (VGP) https://www.genomeark.org/vgp-all/Anas_platyrhy…
Accession	Other IDs	Source	OrdFam	Order	Family	Species	Notes
CL100153795_L01	B10K-DU-023-23	B10K	AnsAna	Anseriformes	Anatidae	Aix_galericulata
GCA_024635365.1		NCBI	AnsAna	Anseriformes	Anatidae	Aix_galericulata
GCA_032270905.1	ASM3227090v1	NCBI	AnsAna	Anseriformes	Anatidae	Aix_sponsa
B10K-D-WWT-1	B10K-D-WWT-1	B10K	AnsAna	Anseriformes	Anatidae	Aix_sponsa
D1907004292	B10K-DU-010-79	B10K	AnsAna	Anseriformes	Anatidae	Alopochen_aegyptiaca
D2007020470	CUBE466	B10K	AnsAna	Anseriformes	Anatidae	Amazonetta_brasiliensis
D2006016059	CUBE155	B10K	AnsAna	Anseriformes	Anatidae	Anas_acuta	Excluded
GCA_963932015.1	bAnaAcu1.1	NCBI	AnsAna	Anseriformes	Anatidae	Anas_acuta	Phased genome
GCA_036026395.1	ASM3602639v1	NCBI	AnsAna	Anseriformes	Anatidae	Anas_acuta
GCA_963932075.1	bAnaAcu1.1 alternate haplotype	NCBI	AnsAna	Anseriformes	Anatidae	Anas_acuta	Phased genome
D2007020419	CUBE415	B10K	AnsAna	Anseriformes	Anatidae	Anas_bahamensis
B10K-D-IZW-58	B10K-D-IZW-58	B10K	AnsAna	Anseriformes	Anatidae	Anas_bernieri
GCA_032165215.1	ASM3216521v1	NCBI	AnsAna	Anseriformes	Anatidae	Anas_bernieri
GCA_032357685.1	ASM3235768v1	NCBI	AnsAna	Anseriformes	Anatidae	Anas_capensis
D2005012408	Cube0024	B10K	AnsAna	Anseriformes	Anatidae	Anas_fulvigula
GCA_032275265.1	ASM3227526v1	NCBI	AnsAna	Anseriformes	Anatidae	Anas_georgica
D2007020344	CUBE491	B10K	AnsAna	Anseriformes	Anatidae	Anas_gibberifrons
B10K-D-IZW-59	B10K-D-IZW-59	B10K	AnsAna	Anseriformes	Anatidae	Anas_luzonica
B10K-D-IZW-60	B10K-D-IZW-60	B10K	AnsAna	Anseriformes	Anatidae	Anas_melleri
GCA_002224895.1	ASM222489v1	NCBI	AnsAna	Anseriformes	Anatidae	Anas_platyrhynchos
bAnaPla2.hap1.asm.20240405	bAnaPla2.hap1.asm.20240405	VGP	AnsAna	Anseriformes	Anatidae	Anas_platyrhynchos	Phased genome
bAnaPla2.hap2.asm.20240405	bAnaPla2.hap2.asm.20240405	VGP	AnsAna	Anseriformes	Anatidae	Anas_platyrhynchos	Phased genome
GCA_032352815.1	NIB_DD	NCBI	AnsAna	Anseriformes	Anatidae	Anas_platyrhynchos
GCA_000355885.1	BGI_duck_1.0	NCBI	AnsAna	Anseriformes	Anatidae	Anas_platyrhynchos
GCA_017639305.1	CAU_Laying_1.0	NCBI	AnsAna	Anseriformes	Anatidae	Anas_platyrhynchos
GCA_030704485.1	NAwild_v1.0	NCBI	AnsAna	Anseriformes	Anatidae	Anas_platyrhynchos
GCA_037218355.1	Pekin_C18	NCBI	AnsAna	Anseriformes	Anatidae	Anas_platyrhynchos
GCA_002743455.1	CAU_duck1.0	NCBI	AnsAna	Anseriformes	Anatidae	Anas_platyrhynchos
GCA_003850225.1	IASCAAS_PekingDuck_PBH1.5	NCBI	AnsAna	Anseriformes	Anatidae	Anas_platyrhynchos
GCA_008746955.3	CAU-Wild1.1	NCBI	AnsAna	Anseriformes	Anatidae	Anas_platyrhynchos
GCA_017639285.1	CAU_Pekin_2.0	NCBI	AnsAna	Anseriformes	Anatidae	Anas_platyrhynchos
GCA_900411745.1	duckbase.refseq.v4	NCBI	AnsAna	Anseriformes	Anatidae	Anas_platyrhynchos
GCA_015476345.1		NCBI	AnsAna	Anseriformes	Anatidae	Anas_platyrhynchos
D2006016005	CUBE149	B10K	AnsAna	Anseriformes	Anatidae	Anas_superciliosa
B10K-D-IZW-61	B10K-D-IZW-61	B10K	AnsAna	Anseriformes	Anatidae	Anas_undulata
GCA_002224875.1		NCBI	AnsAna	Anseriformes	Anatidae	Anas_zonorhyncha
DBG-30	B10K-D-DBG-30	B10K	AnsAna	Anseriformes	Anatidae	Anser_albifrons
DBG-36	B10K-D-DBG-36	B10K	AnsAna	Anseriformes	Anatidae	Anser_anser
GCA_002592135.1	GCA_002592135.1	NCBI	AnsAna	Anseriformes	Anatidae	Anser_brachyrhynchus
GCA_013030995.1	ASM1303099v1	NCBI	AnsAna	Anseriformes	Anatidae	Anser_cygnoides
GCA_025388735.1		NCBI	AnsAna	Anseriformes	Anatidae	Anser_cygnoides
GCA_026259575.1	AnsCyg_swan_goose_v2.0	NCBI	AnsAna	Anseriformes	Anatidae	Anser_cygnoides
GCA_002166845.1		NCBI	AnsAna	Anseriformes	Anatidae	Anser_cygnoides
GCA_000971095.1	AnsCyg_PRJNA183603_v1.0; NCBI-009	NCBI	AnsAna	Anseriformes	Anatidae	Anser_cygnoides_domesticus
GCA_030515125.1	QAU1.0	NCBI	AnsAna	Anseriformes	Anatidae	Anser_cygnoides_domesticus
DBGNRM61	B10K-D-NRM-61-DBG	B10K	AnsAna	Anseriformes	Anatidae	Anser_erythropus
DBGNRM71	B10K-D-NRM-71-DBG	B10K	AnsAna	Anseriformes	Anatidae	Anser_fabalis
GCA_025583725.1		NCBI	AnsAna	Anseriformes	Anatidae	Anser_indicus
GCA_006229135.1	GCA_006229135.1	NCBI	AnsAna	Anseriformes	Anatidae	Anser_indicus
D1907004357	B10K-DU-011-28	B10K	AnsAna	Anseriformes	Anatidae	Anser_rossii
GCA_013398475.1		NCBI	AnsAna	Anseriformes	Anatidae	Asarcornis_scutulata
CL200153793_L02	B10K-DU-023-16	B10K	AnsAna	Anseriformes	Anatidae	Aythya_affinis
D2006016050	CUBE154	B10K	AnsAna	Anseriformes	Anatidae	Aythya_americana
GCA_026413565.1	ASM2641356v1	NCBI	AnsAna	Anseriformes	Anatidae	Aythya_baeri
D1907001858	B10K-DU-023-20	B10K	AnsAna	Anseriformes	Anatidae	Aythya_collaris
D1907000514	B10K-DU-015-15	B10K	AnsAna	Anseriformes	Anatidae	Aythya_ferina
GCA_009819845.1	bAytFul2.alt	NCBI	AnsAna	Anseriformes	Anatidae	Aythya_fuligula	Phased genome
GCA_009819795.1	GCA_009819795.1	NCBI	AnsAna	Anseriformes	Anatidae	Aythya_fuligula	Phased genome
GCA_029042245.1	ASM2904224v1	NCBI	AnsAna	Anseriformes	Anatidae	Aythya_marila
MOB-23	B10K-D-MOB-23	B10K	AnsAna	Anseriformes	Anatidae	Aythya_nyroca
D2007020471	CUBE467	B10K	AnsAna	Anseriformes	Anatidae	Branta_bernicla
D2110088454	B10K-D-PZB-07	B10K	AnsAna	Anseriformes	Anatidae	Branta_canadensis
GCA_006130075.1	GCA_006130075.1	NCBI	AnsAna	Anseriformes	Anatidae	Branta_canadensis
B10K-D-MSB-25	B10K-D-MSB-25	B10K	AnsAna	Anseriformes	Anatidae	Branta_hutchinsii
GCA_032270845.1	ASM3227084v1	NCBI	AnsAna	Anseriformes	Anatidae	Branta_hutchinsii
DBGNRM65	B10K-D-NRM-65-DBG	B10K	AnsAna	Anseriformes	Anatidae	Branta_leucopsis
D2104051282	B10K-D-PZB-2	B10K	AnsAna	Anseriformes	Anatidae	Branta_ruficollis
D2007017072	CUBE363	B10K	AnsAna	Anseriformes	Anatidae	Branta_sandvicensis
DBGNRM73	B10K-D-NRM-73-DBG	B10K	AnsAna	Anseriformes	Anatidae	Bucephala_clangula
D1907003562	B10K-DU-008-04	B10K	AnsAna	Anseriformes	Anatidae	Bucephala_islandica
GCA_018104995.1	ASM1810499v1	NCBI	AnsAna	Anseriformes	Anatidae	Cairina_moschata
GCA_009194515.1	CaiMos1.0	NCBI	AnsAna	Anseriformes	Anatidae	Cairina_moschata_domestica
D1907004294	B10K-DU-009-02	B10K	AnsAna	Anseriformes	Anatidae	Callonetta_leucophrys
B10K-D-IZW-75	B10K-D-IZW-75	B10K	AnsAna	Anseriformes	Anatidae	Cereopsis_novaehollandiae
D2007020407	CUBE554	B10K	AnsAna	Anseriformes	Anatidae	Chenonetta_jubata
D2104051195	B10K-D-IZW-14	B10K	AnsAna	Anseriformes	Anatidae	Chloephaga_hybrida
B10K-D-WWT-5	B10K-D-WWT-5	B10K	AnsAna	Anseriformes	Anatidae	Chloephaga_melanoptera
B10K-D-IZW-12	D2104051193	B10K	AnsAna	Anseriformes	Anatidae	Chloephaga_melanoptera
B10K-D-IZW-10	D2102046023	B10K	AnsAna	Anseriformes	Anatidae	Chloephaga_picta
B10K-D-WWT-7	B10K-D-WWT-7	B10K	AnsAna	Anseriformes	Anatidae	Chloephaga_picta
B10K-D-IZW-11	D2104051192	B10K	AnsAna	Anseriformes	Anatidae	Chloephaga_poliocephala
D2104051194	B10K-D-IZW-13	B10K	AnsAna	Anseriformes	Anatidae	Chloephaga_rubidiceps
GCA_029619115.1	ASM2961911v1	NCBI	AnsAna	Anseriformes	Anatidae	Clangula_hyemalis
B10K-D-DBG-162	B10K-D-DBG-162	B10K	AnsAna	Anseriformes	Anatidae	Clangula_hyemalis
D2102046636	B10K-D-IZW-17	B10K	AnsAna	Anseriformes	Anatidae	Coscoroba_coscoroba
B10K-D-WWT-10	B10K-D-WWT-10	B10K	AnsAna	Anseriformes	Anatidae	Cyanochen_cyanoptera
GCA_907166815.1	blackswan2.fasta.gz	NCBI	AnsAna	Anseriformes	Anatidae	Cygnus_atratus	No annotations
GCA_907166825.1	blackswan6.fasta.gz	NCBI	AnsAna	Anseriformes	Anatidae	Cygnus_atratus	No annotations
GCA_907166835.1	blackswan7.fasta.gz	NCBI	AnsAna	Anseriformes	Anatidae	Cygnus_atratus	No annotations
GCA_907166845.1	blackswan3.fasta.gz	NCBI	AnsAna	Anseriformes	Anatidae	Cygnus_atratus	No annotations
GCA_907166935.1	blackswan5.fasta.gz	NCBI	AnsAna	Anseriformes	Anatidae	Cygnus_atratus	No annotations
GCA_910591715.1	blackswan9.fasta.gz	NCBI	AnsAna	Anseriformes	Anatidae	Cygnus_atratus	No annotations
GCA_910591725.1	blackswan10.fasta.gz	NCBI	AnsAna	Anseriformes	Anatidae	Cygnus_atratus	No annotations
GCA_910591735.1	blackswan8.fasta.gz	NCBI	AnsAna	Anseriformes	Anatidae	Cygnus_atratus	No annotations
GCA_910591745.1	blackswan1.fasta.gz	NCBI	AnsAna	Anseriformes	Anatidae	Cygnus_atratus	No annotations
GCA_013377495.2		NCBI	AnsAna	Anseriformes	Anatidae	Cygnus_atratus
GCA_019232035.1	GCA_019232035.1	NCBI	AnsAna	Anseriformes	Anatidae	Cygnus_buccinator
DBG-71	B10K-D-DBG-71	B10K	AnsAna	Anseriformes	Anatidae	Cygnus_columbianus
GCA_014362685.1	GCA_014362685.1	NCBI	AnsAna	Anseriformes	Anatidae	Cygnus_cygnus
DBG88	B10K-D-DBG-88	B10K	AnsAna	Anseriformes	Anatidae	Cygnus_cygnus
CL100153795_L02	B10K-DU-023-31	B10K	AnsAna	Anseriformes	Anatidae	Cygnus_melancoryphus
GCA_009769485.2	bCygOlo1.alt.v2	NCBI	AnsAna	Anseriformes	Anatidae	Cygnus_olor	Phased genome
GCA_009769625.2	GCA_009769625.2	NCBI	AnsAna	Anseriformes	Anatidae	Cygnus_olor	Phased genome
B10K-D-IZW-83	B10K-D-IZW-83	B10K	AnsAna	Anseriformes	Anatidae	Dendrocygna_arborea
B10K-D-USNM-95	B10K-D-USNM-95	B10K	AnsAna	Anseriformes	Anatidae	Dendrocygna_autumnalis
B10K-D-IZW-84	B10K-D-IZW-84	B10K	AnsAna	Anseriformes	Anatidae	Dendrocygna_bicolor
B10K-D-IZW-85	B10K-D-IZW-85	B10K	AnsAna	Anseriformes	Anatidae	Dendrocygna_guttata
B10K-D-IZW-86	B10K-D-IZW-86	B10K	AnsAna	Anseriformes	Anatidae	Dendrocygna_javanica
CL100160616_L02	B10K-DU-003-55	B10K	AnsAna	Anseriformes	Anatidae	Dendrocygna_viduata
B10K-D-WWT-13	B10K-D-WWT-13	B10K	AnsAna	Anseriformes	Anatidae	Heteronetta_atricapilla
GCA_011075105.1	GCA_011075105.1	NCBI	AnsAna	Anseriformes	Anatidae	Heteronetta_atricapilla
D1907004311	B10K-DU-009-24	B10K	AnsAna	Anseriformes	Anatidae	Histrionicus_histrionicus
B10K-D-WWT-15	B10K-D-WWT-15	B10K	AnsAna	Anseriformes	Anatidae	Lophodytes_cucullatus
B10K-D-WWT-17	B10K-D-WWT-17	B10K	AnsAna	Anseriformes	Anatidae	Lophonetta_specularioides
GCA_032165235.1	ASM3216523v1	NCBI	AnsAna	Anseriformes	Anatidae	Lophonetta_specularioides
D2212160205	B10K-D-UWBM-83	B10K	AnsAna	Anseriformes	Anatidae	Mareca_americana
GCA_035588595.1	ASM3558859v1	NCBI	AnsAna	Anseriformes	Anatidae	Mareca_americana
D2006016302	CUBE174	B10K	AnsAna	Anseriformes	Anatidae	Mareca_falcata
DT2207277613-1	T2207277613	B10K	AnsAna	Anseriformes	Anatidae	Mareca_penelope	Excluded
GCA_036026335.1	ASM3602633v1	NCBI	AnsAna	Anseriformes	Anatidae	Mareca_penelope
GCA_034783215.1	ASM3478321v1	NCBI	AnsAna	Anseriformes	Anatidae	Mareca_sibilatrix
D2104051175	B10K-D-CPHZ-2	B10K	AnsAna	Anseriformes	Anatidae	Mareca_sibilatrix	Excluded
DBGNRM54	B10K-D-NRM-54-DBG	B10K	AnsAna	Anseriformes	Anatidae	Mareca_strepera
GCA_035583915.1	ASM3558391v1	NCBI	AnsAna	Anseriformes	Anatidae	Mareca_strepera
D1907004224	B10K-DU-010-04	B10K	AnsAna	Anseriformes	Anatidae	Marmaronetta_angustirostris
D2208137246	B10K-D-ZMMU-1	B10K	AnsAna	Anseriformes	Anatidae	Melanitta_americana
D2212160212	B10K-D-YIOJ-14	B10K	AnsAna	Anseriformes	Anatidae	Melanitta_americana
GCA_029620185.1	ASM2962018v1	NCBI	AnsAna	Anseriformes	Anatidae	Melanitta_fusca
D2006016004	CUBE158	B10K	AnsAna	Anseriformes	Anatidae	Melanitta_nigra
D1907004383	B10K-DU-009-70	B10K	AnsAna	Anseriformes	Anatidae	Melanitta_perspicillata
D2104051303	B10K-D-NMHD-76	B10K	AnsAna	Anseriformes	Anatidae	Merganetta_armata	Excluded
D2104051214	B10K-D-NRM-22	B10K	AnsAna	Anseriformes	Anatidae	Mergellus_albellus
B10K-D-WWT-19	B10K-D-WWT-19	B10K	AnsAna	Anseriformes	Anatidae	Mergellus_albellus
D2104051199	B10K-D-IZW-29	B10K	AnsAna	Anseriformes	Anatidae	Mergellus_albellus
D1907004324	B10K-DU-009-40	B10K	AnsAna	Anseriformes	Anatidae	Mergus_merganser
D2006016306	CUBE178	B10K	AnsAna	Anseriformes	Anatidae	Mergus_serrator
B10K-D-WWT-20	B10K-D-WWT-20	B10K	AnsAna	Anseriformes	Anatidae	Neochen_jubata
D2102046032	B10K-D-IZW-36	B10K	AnsAna	Anseriformes	Anatidae	Neochen_jubatus
B10K-D-IZW-104	B10K-D-IZW-104	B10K	AnsAna	Anseriformes	Anatidae	Netta_erythrophthalma
D1907004221	B10K-DU-008-81	B10K	AnsAna	Anseriformes	Anatidae	Netta_peposaca
MOB-64	B10K-D-MOB-64	B10K	AnsAna	Anseriformes	Anatidae	Netta_rufina
GCA_011076525.1	GCA_011076525.1	NCBI	AnsAna	Anseriformes	Anatidae	Nettapus_auritus
D1907003520	B10K-DU-007-27	B10K	AnsAna	Anseriformes	Anatidae	Nomonyx_dominicus
GCA_011077185.1	GCA_011077185.1	NCBI	AnsAna	Anseriformes	Anatidae	Oxyura_jamaicensis
B10K-D-IZW-106	B10K-D-IZW-106	B10K	AnsAna	Anseriformes	Anatidae	Oxyura_leucocephala
B10K-D-WWT-22	B10K-D-WWT-22	B10K	AnsAna	Anseriformes	Anatidae	Plectropterus_gambensis
D2301166173	B10K-D-NSMTJ-88	B10K	AnsAna	Anseriformes	Anatidae	Polysticta_stelleri
D2102046034	B10K-D-IZW-43	B10K	AnsAna	Anseriformes	Anatidae	Pteronetta_hartlaubii
GCA_030142145.1	ASM3014214v1	NCBI	AnsAna	Anseriformes	Anatidae	Somateria_mollissima
CL100150685_L01	B10K-DU-020-68	B10K	AnsAna	Anseriformes	Anatidae	Somateria_mollissima
GCA_951411735.1	bSomMol1.h1.1	NCBI	AnsAna	Anseriformes	Anatidae	Somateria_mollissima	Phased genome
GCA_951416345.1	bSomMol1.h2.1	NCBI	AnsAna	Anseriformes	Anatidae	Somateria_mollissima	Phased genome
D2006016067	CUBE165	B10K	AnsAna	Anseriformes	Anatidae	Somateria_spectabilis
D2212160216	B10K-D-UWBM-92	B10K	AnsAna	Anseriformes	Anatidae	Spatula_clypeata
GCA_032165275.1	ASM3216527v1	NCBI	AnsAna	Anseriformes	Anatidae	Spatula_discors
D2007020414	CUBE410	B10K	AnsAna	Anseriformes	Anatidae	Spatula_platalea
GCA_032191525.1	ASM3219152v1	NCBI	AnsAna	Anseriformes	Anatidae	Spatula_querquedula
GCA_034783165.1	ASM3478316v1	NCBI	AnsAna	Anseriformes	Anatidae	Spatula_rhynchotis
GCA_035221675.1	ASM3522167v1	NCBI	AnsAna	Anseriformes	Anatidae	Spatula_smithii
D2007020420	CUBE416	B10K	AnsAna	Anseriformes	Anatidae	Spatula_versicolor
GCA_032165255.1	ASM3216525v1	NCBI	AnsAna	Anseriformes	Anatidae	Speculanas_specularis
D2102046036	B10K-D-IZW-45	B10K	AnsAna	Anseriformes	Anatidae	Speculanas_specularis
D2006016299	CUBE171	B10K	AnsAna	Anseriformes	Anatidae	Stictonetta_naevosa
GCA_011074415.1	GCA_011074415.1	NCBI	AnsAna	Anseriformes	Anatidae	Stictonetta_naevosa
GCA_032357605.1	ASM3235760v1	NCBI	AnsAna	Anseriformes	Anatidae	Tachyeres_brachypterus
GCA_034780855.1	ASM3478085v1	NCBI	AnsAna	Anseriformes	Anatidae	Tachyeres_leucocephalus
D2102046038	B10K-D-IZW-48	B10K	AnsAna	Anseriformes	Anatidae	Tachyeres_pteneres
B10K-D-IZW-124	B10K-D-IZW-124	B10K	AnsAna	Anseriformes	Anatidae	Tadorna_cana
B10K-D-WWT-25	B10K-D-WWT-25	B10K	AnsAna	Anseriformes	Anatidae	Tadorna_tadorna
D2110088457	B10K-D-PZB-11	B10K	AnsAna	Anseriformes	Anatidae	Tadorna_tadorna
DBGNRM58	B10K-D-NRM-58-DBG	B10K	AnsAna	Anseriformes	Anatidae	Tadorna_tadorna
D2007020370	CUBE517	B10K	AnsAna	Anseriformes	Anatidae	Tadorna_variegata
D2102046040	B10K-D-IZW-51	B10K	AnsAna	Anseriformes	Anatidae	Thalassornis_leuconotus

## Sheet: ST2 Annotation summary
Supplementary Table 2. Summary of annotated proteins by genome. DS1 is Dataset 1 containing sequences 70% complete. DS2 is Dataset 2, containing only unique sequences at the species level. DS all is the complete list of proteins annotated.
Genome_ID	Genus	Species	Genome	Albumin_DS1	Albumin_DS2	Albumin_DSall	BPIfoldB4_DS1	BPIfoldB4_DS2	BPI_fold_B4_DSall	Clusterin_DS1	Clusterin_DS2	Clusterin_DSall	COL1a1_DS1	COL1a1_DS2	COL1a1_DSall	COL1a2_DS1	COL1a2_DS2	COL1a2_DSall	Lactadherin_DS1	Lactadherin_DS2	Lactadherin_DSall	OC116_DS1	OC116_DS2	OC116_DSall	Ovalbumin_DS1	Ovalbumin_DS2	Ovalbumin_DSall	Ovocalyxin32_DS1	Ovocalyxin32_DS2	Ovocalyxin32_DSall	Ovomucoid_DS1	Ovomucoid_DS2	Ovomucoid_DSall	Ovotransferrin_DS1	Ovotransferrin_DS2	Ovotransferrin_DSall	XCA1_DS1	XCA1_DS2	XCA1_DSall	XCA2_DS1	XCA2_DS2	XCA2_DSall
Aix_galericulata_CL100153795_L01	Aix	Aix_galericulata	CL100153795_L01	1	0	1	1	0	1	0	0	0	0	0	0	1	0	1	1	1	1	1	0	1	1	0	1	1	0	1	1	0	1	1	0	1	1	0	1	1	0	1
Aix_galericulata_GCA_024635365	Aix	Aix_galericulata	GCA_024635365	1	1	1	1	1	1	1	1	1	1	1	1	1	1	1	1	1	1	1	1	1	1	1	1	1	1	1	1	1	1	1	1	1	1	1	1	1	1	1
Aix_sponsa_B10K-D-WWT-1	Aix	Aix_sponsa	B10K-D-WWT-1_NA	1	1	1	1	1	1	1	1	1	1	1	1	1	1	1	1	1	1	1	1	1	1	1	1	1	1	1	1	1	1	1	0	0	1	1	1	1	1	1
Aix_sponsa_GCA_032270905	Aix	Aix_sponsa	GCA_032270905	1	0	1	1	0	1	0	0	0	1	1	1	1	1	1	0	0	0	1	1	1	0	0	0	1	1	1	0	0	0	1	0	1	0	0	0	1	1	1
Alopochen_aegyptiaca_D1907004292	Alopochen	Alopochen_aegyptiaca	D1907004292_NA	1	1	1	1	1	1	0	1	1	0	1	1	1	1	1	1	1	1	1	1	1	1	1	1	1	1	1	1	1	1	1	1	1	1	1	1	1	1	1
Amazonetta_brasiliensis_D2007020470	Amazonetta	Amazonetta_brasiliensis	D2007020470_NA	1	1	1	1	1	1	0	1	1	0	0	0	1	1	1	1	1	1	1	1	1	1	1	1	1	1	1	1	1	1	1	1	1	1	1	1	0	1	1
Anas_acuta_GCA_036026395	Anas	Anas_acuta	GCA_036026395	1	1	1	1	0	1	1	1	1	1	0	1	1	0	1	1	1	1	1	1	1	1	0	1	1	1	1	1	0	1	1	1	1	1	0	1	1	1	1
Anas_acuta_GCA_963932015	Anas	Anas_acuta	GCA_963932015	1	0	1	1	1	1	1	1	1	1	1	1	1	1	1	1	1	1	1	1	1	1	1	1	1	1	1	1	1	1	1	1	1	1	0	1	1	1	1
Anas_acuta_GCA_963932075	Anas	Anas_acuta	GCA_963932075	1	0	1	1	1	1	0	0	0	1	0	1	1	0	1	1	1	1	1	1	1	1	1	1	1	0	1	1	0	1	1	1	1	1	1	1	1	0	1
Anas_bahamensis_D2007020419	Anas	Anas_bahamensis	D2007020419_NA	1	1	1	1	1	1	1	1	1	0	0	0	1	1	1	1	1	1	1	1	1	1	1	1	1	1	1	1	1	1	1	1	1	0	1	1	0	1	1
Anas_bernieri_B10K-D-IZW-58	Anas	Anas_bernieri	B10K-D-IZW-58_NA	1	0	1	1	1	1	1	0	1	1	0	1	1	1	1	1	0	1	1	1	1	1	1	1	1	0	1	1	0	1	1	0	1	1	0	1	1	1	1
Anas_bernieri_GCA_032165215	Anas	Anas_bernieri	GCA_032165215	1	1	1	1	1	1	1	1	1	1	1	1	1	1	1	1	1	1	1	1	1	1	1	1	1	1	1	1	1	1	1	1	1	1	1	1	1	1	1
Anas_capensis_GCA_032357685	Anas	Anas_capensis	GCA_032357685	1	1	1	1	1	1	0	0	0	1	1	1	1	1	1	1	1	1	1	1	1	1	1	1	1	1	1	1	1	1	1	1	1	1	1	1	0	1	1
Anas_fulvigula_D2005012408	Anas	Anas_fulvigula	D2005012408_NA	1	1	1	1	1	1	1	1	1	0	0	0	1	1	1	1	1	1	1	1	1	1	1	1	1	1	1	1	1	1	1	1	1	0	0	0	1	1	1
Anas_georgica_GCA_032275265	Anas	Anas_georgica	GCA_032275265	1	1	1	1	1	1	1	1	1	1	1	1	1	1	1	1	1	1	1	1	1	1	1	1	1	1	1	1	1	1	1	1	1	1	1	1	1	1	1
Anas_gibberifrons_D2007020344	Anas	Anas_gibberifrons	D2007020344_NA	1	1	1	1	1	1	0	1	1	0	0	0	1	1	1	1	1	1	1	1	1	1	1	1	1	1	1	1	1	1	1	1	1	0	1	1	1	1	1
Anas_luzonica_B10K-D-IZW-59	Anas	Anas_luzonica	B10K-D-IZW-59_NA	1	1	1	1	1	1	1	1	1	0	1	1	1	1	1	1	1	1	1	1	1	1	1	1	1	1	1	1	1	1	1	1	1	1	1	1	1	1	1
Anas_melleri_B10K-D-IZW-60	Anas	Anas_melleri	B10K-D-IZW-60_NA	1	1	1	1	1	1	1	1	1	0	0	0	1	1	1	1	1	1	1	1	1	1	1	1	1	1	1	1	1	1	1	1	1	1	1	1	1	1	1
Anas_platyrhynchos_bAnaPla2-hap1	Anas	Anas_platyrhynchos	bAnaPla2-hap1_NA	1	0	0	1	0	0	1	1	0	1	0	0	1	0	0	1	0	0	1	1	0	1	0	0	1	1	0	1	0	0	1	0	0	1	1	0	1	0	0
Anas_platyrhynchos_bAnaPla2-hap2	Anas	Anas_platyrhynchos	bAnaPla2-hap2_NA	1	0	0	1	1	0	1	1	0	1	0	0	1	0	0	1	0	0	1	1	0	1	1	0	1	1	0	1	0	0	1	0	0	1	1	0	1	1	0
Anas_platyrhynchos_GCA_000355885	Anas	Anas_platyrhynchos	GCA_000355885	1	0	1	1	0	1	0	0	1	0	0	0	1	0	1	1	0	1	1	1	1	1	0	1	1	0	1	1	0	1	1	0	1	0	0	1	0	0	1
Anas_platyrhynchos_GCA_002224895	Anas	Anas_platyrhynchos	GCA_002224895	1	0	1	1	1	1	1	1	1	1	0	1	1	0	1	1	0	1	1	1	1	1	0	1	1	0	1	1	0	1	1	0	1	1	1	1	1	0	1
Anas_platyrhynchos_GCA_002743455	Anas	Anas_platyrhynchos	GCA_002743455	1	0	1	1	0	1	0	1	1	1	0	1	1	0	1	1	0	1	1	1	1	0	0	0	1	0	1	1	0	1	1	0	0	1	0	1	1	0	1
Anas_platyrhynchos_GCA_003850225	Anas	Anas_platyrhynchos	GCA_003850225	1	0	1	1	0	1	0	0	0	0	0	0	1	0	1	1	0	1	1	0	1	0	0	0	1	0	1	1	1	1	1	0	1	0	0	0	0	0	0
Anas_platyrhynchos_GCA_008746955	Anas	Anas_platyrhynchos	GCA_008746955	1	0	1	1	1	1	0	0	0	1	0	1	1	0	1	1	0	1	1	1	1	1	0	1	1	1	1	1	0	1	1	0	1	1	0	1	1	0	1
Anas_platyrhynchos_GCA_015476345	Anas	Anas_platyrhynchos	GCA_015476345	1	1	1	1	1	1	0	0	0	1	1	1	1	1	1	1	1	1	1	1	1	1	1	1	1	1	1	1	1	1	1	1	1	1	1	1	1	1	1
Anas_platyrhynchos_GCA_017639285	Anas	Anas_platyrhynchos	GCA_017639285	1	0	1	1	0	1	0	0	0	1	0	1	1	0	1	1	0	1	1	0	1	1	0	1	1	0	1	1	0	1	1	0	1	1	1	1	1	0	1
Anas_platyrhynchos_GCA_017639305	Anas	Anas_platyrhynchos	GCA_017639305	1	0	1	1	0	1	0	0	0	1	0	1	1	0	1	1	0	1	1	1	1	1	0	1	1	1	1	1	0	1	1	1	1	1	1	1	1	0	1
Anas_platyrhynchos_GCA_030704485	Anas	Anas_platyrhynchos	GCA_030704485	1	0	1	1	0	1	1	1	1	0	0	0	1	0	1	1	0	1	1	1	1	1	0	1	1	1	1	1	0	1	1	1	1	0	0	0	1	0	1
Anas_platyrhynchos_GCA_032352815	Anas	Anas_platyrhynchos	GCA_032352815	1	0	1	1	0	1	1	1	1	0	0	1	0	0	1	1	1	1	1	1	1	1	0	1	0	0	1	1	0	1	1	0	1	1	1	1	1	0	1
Anas_platyrhynchos_GCA_037218355	Anas	Anas_platyrhynchos	GCA_037218355	1	0	1	1	0	1	1	0	1	1	0	1	1	0	1	1	0	1	1	1	1	1	0	1	1	1	1	1	0	1	1	0	1	1	0	1	1	0	1
Anas_platyrhynchos_GCA_900411745	Anas	Anas_platyrhynchos	GCA_900411745	1	0	1	1	0	1	0	0	1	0	0	0	1	0	1	1	0	1	1	0	1	1	0	1	1	0	1	1	0	1	1	0	1	0	0	0	0	0	0
Anas_superciliosa_D2006016005	Anas	Anas_superciliosa	D2006016005_NA	1	1	1	1	1	1	1	1	1	0	0	0	1	1	1	1	1	1	1	1	1	1	1	1	1	1	1	1	1	1	1	1	1	1	1	1	1	1	1
Anas_undulata_B10K-D-IZW-61	Anas	Anas_undulata	B10K-D-IZW-61_NA	1	1	1	1	1	1	1	1	1	1	1	1	1	1	1	1	1	1	1	1	1	1	1	1	1	1	1	1	1	1	1	1	1	1	1	1	1	1	1
Anas_zonorhyncha_GCA_002224875	Anas	Anas_zonorhyncha	GCA_002224875	1	1	1	1	1	1	1	1	1	1	1	1	1	1	1	1	1	1	1	1	1	1	1	1	1	1	1	1	1	1	1	1	1	1	1	1	1	1	1
Anser_albifrons_DBG-30	Anser	Anser_albifrons	DBG-30_NA	1	1	1	1	1	1	1	1	1	0	1	1	1	1	1	1	1	1	1	1	1	1	1	1	1	1	1	1	1	1	1	1	1	1	1	1	1	1	1
Anser_anser_DBG-36	Anser	Anser_anser	DBG-36_NA	1	1	1	1	1	1	0	1	1	0	0	0	1	1	1	1	1	1	1	1	1	1	1	1	1	1	1	1	1	1	1	1	1	0	1	1	0	1	1
Anser_brachyrhynchus_GCA_002592135	Anser	Anser_brachyrhynchus	GCA_002592135	1	1	1	1	1	1	0	1	1	1	1	1	1	1	1	1	1	1	1	1	1	1	1	1	1	1	1	1	1	1	1	1	1	1	1	1	1	1	1
Anser_cygnoides_GCA_000971095	Anser	Anser_cygnoides	GCA_000971095	1	0	1	1	1	1	0	0	0	1	0	1	1	0	1	1	1	1	1	1	1	1	0	1	1	0	1	1	0	1	1	0	0	0	0	0	0	0	1
Anser_cygnoides_GCA_002166845	Anser	Anser_cygnoides	GCA_002166845	1	0	1	1	0	1	1	0	1	1	0	1	1	1	1	1	1	1	1	1	1	1	0	1	1	1	1	1	1	1	1	1	1	1	1	1	1	1	1
Anser_cygnoides_GCA_013030995	Anser	Anser_cygnoides	GCA_013030995	1	0	1	1	1	1	0	0	0	1	0	1	0	0	0	1	0	1	1	1	1	1	0	1	1	0	1	1	0	1	1	1	1	1	0	1	1	0	1
Anser_cygnoides_GCA_025388735	Anser	Anser_cygnoides	GCA_025388735	1	0	1	1	1	1	0	0	0	1	1	1	1	0	1	1	0	1	1	1	1	1	1	1	1	0	1	1	0	1	1	0	1	1	0	1	1	0	1
Anser_cygnoides_GCA_026259575	Anser	Anser_cygnoides	GCA_026259575	1	1	1	1	1	1	1	1	1	1	0	1	1	0	1	1	0	1	1	1	1	1	1	1	1	0	1	1	0	1	1	0	1	1	0	1	1	0	1
Anser_cygnoides_GCA_030515125	Anser	Anser_cygnoides	GCA_030515125	1	0	1	1	0	1	0	0	0	1	0	1	0	0	0	1	0	1	1	0	1	1	0	1	1	1	1	1	0	1	1	0	0	1	0	1	1	0	1
Anser_erythropus_DBGNRM61	Anser	Anser_erythropus	DBGNRM61_NA	1	1	1	1	1	1	0	1	1	0	1	1	1	1	1	1	1	1	1	1	1	1	1	1	1	1	1	1	1	1	1	1	1	1	1	1	1	1	1
Anser_fabalis_DBGNRM71	Anser	Anser_fabalis	DBGNRM71_NA	1	1	1	1	1	1	0	0	0	0	0	0	1	1	1	0	1	1	1	1	1	1	1	1	1	1	1	1	1	1	1	1	1	0	0	0	0	0	0
Anser_indicus_GCA_006229135	Anser	Anser_indicus	GCA_006229135	1	1	1	1	1	1	1	1	1	1	1	1	1	1	1	1	1	1	1	1	1	1	1	1	1	1	1	1	1	1	1	1	1	1	0	1	1	1	1
Anser_indicus_GCA_025583725	Anser	Anser_indicus	GCA_025583725	1	0	1	1	0	1	1	1	1	1	1	1	1	1	1	1	0	1	1	1	1	1	0	1	1	1	1	1	1	1	1	0	1	1	1	1	1	1	1
Anser_rossii_D1907004357	Anser	Anser_rossii	D1907004357_NA	1	1	1	1	1	1	0	0	0	0	0	0	1	1	1	1	1	1	0	1	1	1	1	1	1	1	1	1	1	1	1	1	1	0	0	0	1	1	1
Asarcornis_scutulata_GCA_013398475	Asarcornis	Asarcornis_scutulata	GCA_013398475	1	1	1	1	1	1	1	1	1	1	1	1	1	1	1	1	1	1	1	1	1	1	1	1	1	1	1	1	1	1	1	1	1	1	1	1	1	1	1
Aythya_affinis_CL200153793_L02	Aythya	Aythya_affinis	CL200153793_L02	1	1	1	1	1	1	1	1	1	1	1	1	1	1	1	1	1	1	1	1	1	1	1	1	1	1	1	1	1	1	1	1	1	0	0	0	1	1	1
Aythya_americana_D2006016050	Aythya	Aythya_americana	D2006016050_NA	1	1	1	1	1	1	1	1	1	1	1	1	1	1	1	1	1	1	1	1	1	1	1	1	1	1	1	1	1	1	1	1	1	1	1	1	1	1	1
Aythya_baeri_GCA_026413565	Aythya	Aythya_baeri	GCA_026413565	1	1	1	1	1	1	1	1	1	1	1	1	1	1	1	1	1	1	1	1	1	1	1	1	1	1	1	1	1	1	1	1	1	1	1	1	1	1	1
Aythya_collaris_D1907001858	Aythya	Aythya_collaris	D1907001858_NA	1	1	1	1	1	1	1	1	1	0	1	1	1	1	1	1	1	1	1	1	1	1	1	1	0	1	1	1	1	1	1	1	1	1	1	1	1	1	1
Aythya_ferina_D1907000514	Aythya	Aythya_ferina	D1907000514_NA	1	1	1	1	1	1	0	1	1	0	0	0	1	1	1	1	1	1	1	1	1	1	1	1	1	1	1	1	1	1	1	1	1	0	0	0	1	1	1
Aythya_fuligula_GCA_009819795	Aythya	Aythya_fuligula	GCA_009819795	1	1	1	1	1	1	1	1	1	0	0	1	1	1	1	1	1	1	1	1	1	1	0	1	1	1	1	1	1	1	1	1	1	1	1	1	1	1	1
Aythya_fuligula_GCA_009819845	Aythya	Aythya_fuligula	GCA_009819845	1	0	1	1	1	1	1	1	1	1	1	1	1	0	1	1	1	1	1	0	1	1	1	1	1	1	1	1	0	1	1	0	1	0	0	0	0	0	0
Aythya_marila_GCA_029042245	Aythya	Aythya_marila	GCA_029042245	1	1	1	1	1	1	1	1	1	1	1	1	1	1	1	1	1	1	1	1	1	1	1	1	1	1	1	1	1	1	1	1	1	1	1	1	1	1	1
Aythya_nyroca_MOB-23	Aythya	Aythya_nyroca	MOB-23_NA	1	1	1	1	1	1	1	1	1	0	1	1	1	1	1	1	1	1	1	1	1	1	1	1	1	1	1	1	1	1	1	1	1	1	1	1	1	1	1
Branta_bernicla_D2007020471	Branta	Branta_bernicla	D2007020471_NA	1	1	1	1	1	1	0	1	1	0	1	1	1	1	1	1	1	1	1	1	1	1	1	1	1	1	1	1	1	1	1	1	1	0	1	1	1	1	1
Branta_canadensis_D2110088454	Branta	Branta_canadensis	D2110088454_NA	1	1	1	1	1	1	0	0	0	0	0	1	1	0	1	1	1	1	1	1	1	1	0	1	1	1	1	1	0	1	1	1	1	0	0	1	1	0	1
Branta_canadensis_GCA_006130075	Branta	Branta_canadensis	GCA_006130075	1	1	1	1	1	1	0	1	1	1	1	1	1	1	1	1	1	1	1	1	1	1	1	1	1	1	1	1	1	1	1	1	1	1	1	1	1	1	1
Branta_hutchinsii_B10K-D-MSB-25	Branta	Branta_hutchinsii	B10K-D-MSB-25_NA	1	1	1	1	0	1	0	1	1	0	0	1	1	1	1	1	0	1	1	1	1	1	0	1	1	0	1	1	0	1	1	1	1	0	0	1	1	0	1
Branta_hutchinsii_GCA_032270845	Branta	Branta_hutchinsii	GCA_032270845	1	1	1	1	1	1	0	1	1	1	1	1	1	0	1	1	1	1	1	1	1	1	1	1	1	1	1	1	1	1	1	1	1	1	1	1	1	1	1
Branta_leucopsis_DBGNRM65	Branta	Branta_leucopsis	DBGNRM65_NA	1	1	1	1	1	1	0	0	0	1	1	1	1	1	1	1	1	1	1	1	1	1	1	1	1	1	1	1	1	1	1	1	1	1	1	1	1	1	1
Branta_ruficollis_D2104051282	Branta	Branta_ruficollis	D2104051282_NA	1	1	1	1	1	1	0	0	0	0	0	0	1	1	1	1	1	1	1	1	1	1	1	1	1	1	1	1	1	1	1	1	1	0	1	1	1	1	1
Branta_sandvicensis_D2007017072	Branta	Branta_sandvicensis	D2007017072_NA	1	1	1	1	1	1	0	1	1	0	0	0	1	1	1	1	1	1	1	1	1	1	1	1	1	1	1	1	1	1	1	1	1	1	1	1	1	1	1
Bucephala_clangula_DBGNRM73	Bucephala	Bucephala_clangula	DBGNRM73_NA	1	1	1	1	1	1	1	1	1	0	1	1	1	1	1	1	1	1	1	1	1	1	1	1	1	1	1	1	1	1	1	1	1	1	1	1	1	1	1
Bucephala_islandica_D1907003562	Bucephala	Bucephala_islandica	D1907003562_NA	1	1	1	1	1	1	0	1	1	0	1	1	1	1	1	1	1	1	1	1	1	1	1	1	1	1	1	1	1	1	1	1	1	0	0	0	1	1	1
Cairina_moschata_GCA_009194515	Cairina	Cairina_moschata	GCA_009194515	1	0	1	1	0	1	1	0	1	1	1	1	0	0	1	1	0	1	1	0	1	1	0	1	1	1	1	1	0	1	1	0	0	1	0	1	1	0	1
Cairina_moschata_GCA_018104995	Cairina	Cairina_moschata	GCA_018104995	1	1	1	1	1	1	1	1	1	0	0	0	1	1	1	1	1	1	1	1	1	1	1	1	1	1	1	1	1	1	1	1	1	1	1	1	1	1	1
Callonetta_leucophrys_D1907004294	Callonetta	Callonetta_leucophrys	D1907004294_NA	1	1	1	1	1	1	0	1	1	0	0	0	1	1	1	1	1	1	1	1	1	1	1	1	1	1	1	1	1	1	1	1	1	0	0	0	1	1	1
Cereopsis_novaehollandiae_B10K-D-IZW-75	Cereopsis	Cereopsis_novaehollandiae	B10K-D-IZW-75_NA	1	1	1	1	1	1	0	1	1	1	1	1	1	1	1	1	1	1	1	1	1	1	1	1	1	1	1	1	1	1	1	1	1	1	1	1	1	1	1
Chenonetta_jubata_D2007020407	Chenonetta	Chenonetta_jubata	D2007020407_NA	1	1	1	0	1	1	0	1	1	0	0	0	1	1	1	1	1	1	1	1	1	1	1	1	1	1	1	1	1	1	1	1	1	0	0	0	1	1	1
Chloephaga_hybrida_D2104051195	Chloephaga	Chloephaga_hybrida	D2104051195_NA	1	1	1	1	1	1	1	1	1	0	1	1	1	1	1	1	1	1	1	1	1	1	1	1	1	1	1	1	1	1	1	1	1	1	1	1	1	1	1
Chloephaga_melanoptera_B10K-D-IZW-12	Chloephaga	Chloephaga_melanoptera	B10K-D-IZW-12_NA	1	1	1	1	1	1	0	0	1	0	0	1	1	1	1	1	1	1	1	1	1	1	1	1	1	1	1	1	1	1	1	1	1	1	0	1	1	1	1
Chloephaga_melanoptera_B10K-D-WWT-5	Chloephaga	Chloephaga_melanoptera	B10K-D-WWT-5_NA	1	0	1	1	1	1	1	1	1	1	1	1	1	1	1	1	1	1	1	1	1	1	1	1	1	1	1	1	0	1	1	1	1	1	1	1	1	0	1
Chloephaga_picta_B10K-D-IZW-10	Chloephaga	Chloephaga_picta	B10K-D-IZW-10_NA	1	1	1	1	1	1	1	1	1	0	0	1	1	1	1	1	0	1	1	1	1	1	1	1	1	1	1	1	1	1	1	1	1	0	0	1	1	1	1
Chloephaga_picta_B10K-D-WWT-7	Chloephaga	Chloephaga_picta	B10K-D-WWT-7_NA	1	1	1	1	0	1	1	1	1	1	1	1	1	0	1	1	1	1	1	1	1	1	1	1	1	1	1	1	0	1	1	1	1	1	1	1	1	0	1
Chloephaga_poliocephala_B10K-D-IZW-11	Chloephaga	Chloephaga_poliocephala	B10K-D-IZW-11_NA	1	1	1	1	1	1	0	1	1	0	0	0	1	1	1	1	1	1	1	1	1	1	1	1	1	1	1	1	1	1	1	1	1	0	1	1	0	1	1
Chloephaga_rubidiceps_D2104051194	Chloephaga	Chloephaga_rubidiceps	D2104051194_NA	1	1	1	1	1	1	0	1	1	0	1	1	1	1	1	1	1	1	1	1	1	1	1	1	1	1	1	1	1	1	1	1	1	0	1	1	1	1	1
Clangula_hyemalis_B10K-D-DBG-162	Clangula	Clangula_hyemalis	B10K-D-DBG-162_NA	1	0	1	1	1	1	0	0	0	0	0	0	1	1	1	0	0	1	0	0	0	1	0	1	1	0	1	1	1	1	1	0	1	0	0	0	0	0	0
Clangula_hyemalis_GCA_029619115	Clangula	Clangula_hyemalis	GCA_029619115	1	1	1	1	1	1	0	1	1	0	1	1	1	1	1	1	1	1	1	1	1	1	1	1	1	1	1	1	1	1	1	1	1	1	1	1	1	1	1
Coscoroba_coscoroba_D2102046636	Coscoroba	Coscoroba_coscoroba	D2102046636_NA	1	1	1	1	1	1	0	1	1	0	0	0	1	1	1	1	1	1	1	1	1	1	1	1	1	1	1	1	1	1	1	1	1	0	0	0	1	1	1
Cyanochen_cyanoptera_B10K-D-WWT-10	Cyanochen	Cyanochen_cyanoptera	B10K-D-WWT-10_NA	1	1	1	1	1	1	1	1	1	1	1	1	1	1	1	1	1	1	1	1	1	1	1	1	1	1	1	1	1	1	1	1	1	1	1	1	1	1	1
Cygnus_atratus_GCA_013377495	Cygnus	Cygnus_atratus	GCA_013377495	1	1	1	1	1	1	0	0	0	1	1	1	1	1	1	1	1	1	1	1	1	1	1	1	1	1	1	1	1	1	1	1	1	1	1	1	1	1	1
Cygnus_buccinator_GCA_019232035	Cygnus	Cygnus_buccinator	GCA_019232035	1	1	1	1	1	1	0	0	0	1	1	1	1	1	1	1	1	1	1	1	1	1	1	1	1	1	1	1	1	1	1	1	1	1	1	1	1	1	1
Cygnus_columbianus_DBG-71	Cygnus	Cygnus_columbianus	DBG-71_NA	1	1	1	1	1	1	1	1	1	1	1	1	1	1	1	1	1	1	1	1	1	1	1	1	1	1	1	1	1	1	1	1	1	1	1	1	1	1	1
Cygnus_cygnus_DBG88	Cygnus	Cygnus_cygnus	DBG88_NA	1	0	1	1	1	1	1	1	1	1	1	1	1	1	1	1	1	1	1	1	1	1	1	1	1	0	1	1	0	1	1	1	1	1	1	1	1	1	1
Cygnus_cygnus_GCA_014362685	Cygnus	Cygnus_cygnus	GCA_014362685	1	1	1	1	1	1	0	0	0	1	1	1	1	0	1	1	1	1	1	1	1	1	0	1	1	1	1	1	1	1	1	0	1	1	0	1	0	0	0
Cygnus_melancoryphus_CL100153795_L02	Cygnus	Cygnus_melancoryphus	CL100153795_L02	1	1	1	1	1	1	0	0	0	1	1	1	1	1	1	1	1	1	1	1	1	1	1	1	1	1	1	1	1	1	1	1	1	0	1	1	1	1	1
Cygnus_olor_GCA_009769485	Cygnus	Cygnus_olor	GCA_009769485	1	1	1	1	1	1	0	0	0	1	1	1	1	1	1	1	1	1	1	1	1	1	1	1	1	1	1	0	0	0	0	0	0	1	0	1	0	0	0
Cygnus_olor_GCA_009769625	Cygnus	Cygnus_olor	GCA_009769625	1	0	1	1	0	1	1	1	1	1	0	1	1	1	1	1	1	1	1	1	1	1	1	1	1	0	1	1	1	1	1	1	1	1	1	1	1	1	1
Dendrocygna_arborea_B10K-D-IZW-83	Dendrocygna	Dendrocygna_arborea	B10K-D-IZW-83_NA	1	1	1	1	1	1	0	1	1	1	1	1	1	1	1	1	1	1	1	1	1	1	1	1	1	1	1	1	1	1	1	1	1	1	1	1	1	1	1
Dendrocygna_autumnalis_B10K-D-USNM-95	Dendrocygna	Dendrocygna_autumnalis	B10K-D-USNM-95_NA	1	1	1	1	1	1	0	1	1	0	1	1	1	1	1	1	1	1	1	1	1	1	1	1	1	1	1	1	1	1	1	1	1	1	1	1	1	1	1
Dendrocygna_bicolor_B10K-D-IZW-84	Dendrocygna	Dendrocygna_bicolor	B10K-D-IZW-84_NA	1	1	1	1	1	1	1	1	1	1	1	1	1	1	1	1	1	1	1	1	1	1	1	1	1	1	1	1	1	1	1	1	1	1	1	1	1	1	1
Dendrocygna_guttata_B10K-D-IZW-85	Dendrocygna	Dendrocygna_guttata	B10K-D-IZW-85_NA	1	1	1	1	1	1	1	1	1	1	1	1	1	1	1	1	1	1	1	1	1	1	1	1	1	1	1	1	1	1	1	1	1	1	1	1	1	1	1
Dendrocygna_javanica_B10K-D-IZW-86	Dendrocygna	Dendrocygna_javanica	B10K-D-IZW-86_NA	1	1	1	1	1	1	0	1	1	1	1	1	1	1	1	1	1	1	1	1	1	1	1	1	1	1	1	1	1	1	1	1	1	1	1	1	1	1	1
Dendrocygna_viduata_CL100160616_L02	Dendrocygna	Dendrocygna_viduata	CL100160616_L02	1	1	1	1	1	1	0	1	1	0	1	1	1	1	1	1	1	1	1	1	1	1	1	1	1	1	1	1	1	1	1	1	1	1	1	1	1	1	1
Heteronetta_atricapilla_B10K-D-WWT-13	Heteronetta	Heteronetta_atricapilla	B10K-D-WWT-13_NA	1	0	1	1	0	1	1	1	1	1	1	1	1	0	1	1	0	1	1	0	1	1	0	1	1	0	1	1	0	1	1	0	1	1	0	1	1	0	1
Heteronetta_atricapilla_GCA_011075105	Heteronetta	Heteronetta_atricapilla	GCA_011075105	1	1	1	1	1	1	0	0	0	1	0	1	1	1	1	1	1	1	1	1	1	1	1	1	1	1	1	1	1	1	1	1	1	1	1	1	1	1	1
Histrionicus_histrionicus_D1907004311	Histrionicus	Histrionicus_histrionicus	D1907004311_NA	1	1	1	1	1	1	0	1	1	0	0	0	1	1	1	1	1	1	1	1	1	1	1	1	1	1	1	1	1	1	1	1	1	1	1	1	1	1	1
Lophodytes_cucullatus_B10K-D-WWT-15	Lophodytes	Lophodytes_cucullatus	B10K-D-WWT-15_NA	1	1	1	1	1	1	1	1	1	1	1	1	1	1	1	1	1	1	1	1	1	1	1	1	1	1	1	1	1	1	1	1	1	1	1	1	1	1	1
Lophonetta_specularioides_B10K-D-WWT-17	Lophonetta	Lophonetta_specularioides	B10K-D-WWT-17_NA	1	0	1	1	1	1	0	0	0	0	0	1	1	0	1	1	0	1	1	1	1	1	0	1	1	1	1	1	1	1	1	1	1	1	0	1	1	0	1
Lophonetta_specularioides_GCA_032165235	Lophonetta	Lophonetta_specularioides	GCA_032165235	1	1	1	1	1	1	1	1	1	1	1	1	1	1	1	1	1	1	1	1	1	1	1	1	1	1	1	1	1	1	1	1	1	1	1	1	1	1	1
Mareca_americana_D2212160205	Mareca	Mareca_americana	D2212160205_NA	1	0	1	1	1	1	1	1	1	0	0	0	1	0	1	1	1	1	1	1	1	1	0	1	1	0	1	1	1	1	1	1	1	1	1	1	1	0	1
Mareca_americana_GCA_035588595	Mareca	Mareca_americana	GCA_035588595	1	1	1	1	1	1	1	1	1	1	1	1	1	1	1	1	0	1	1	1	1	1	1	1	1	1	1	1	0	1	1	1	1	1	1	1	1	1	1
Mareca_falcata_D2006016302	Mareca	Mareca_falcata	D2006016302_NA	1	1	1	1	1	1	1	1	1	0	0	0	1	1	1	1	1	1	1	1	1	1	1	1	1	1	1	1	1	1	1	1	1	0	1	1	1	1	1
Mareca_penelope_GCA_036026335	Mareca	Mareca_penelope	GCA_036026335	1	1	1	1	1	1	1	1	1	1	1	1	1	1	1	1	1	1	1	1	1	1	1	1	1	1	1	1	1	1	1	1	1	1	1	1	1	1	1
Mareca_sibilatrix_GCA_034783215	Mareca	Mareca_sibilatrix	GCA_034783215	1	1	1	1	1	1	1	1	1	1	1	1	1	1	1	1	1	1	1	1	1	1	1	1	1	1	1	1	1	1	1	1	1	1	1	1	1	1	1
Mareca_strepera_DBGNRM54	Mareca	Mareca_strepera	DBGNRM54_NA	1	1	1	1	1	1	1	1	1	0	0	0	1	1	1	1	0	1	1	1	1	1	0	1	1	0	1	1	0	1	1	1	1	1	0	1	1	0	1
Mareca_strepera_GCA_035583915	Mareca	Mareca_strepera	GCA_035583915	1	1	1	1	1	1	1	1	1	1	1	1	1	1	1	1	1	1	1	1	1	1	1	1	1	1	1	1	1	1	1	1	1	1	1	1	1	1	1
Marmaronetta_angustirostris_D1907004224	Marmaronetta	Marmaronetta_angustirostris	D1907004224_NA	1	1	1	1	1	1	1	1	1	0	0	0	1	1	1	1	1	1	1	1	1	1	1	1	1	1	1	1	1	1	1	1	1	0	0	0	1	1	1
Melanitta_americana_D2208137246	Melanitta	Melanitta_americana	D2208137246_NA	1	0	1	1	1	1	1	1	1	0	1	1	1	0	1	1	1	1	1	1	1	1	0	1	1	1	1	1	0	1	1	1	1	1	1	1	1	0	1
Melanitta_americana_D2212160212	Melanitta	Melanitta_americana	D2212160212_NA	1	1	1	1	0	1	1	1	1	0	1	1	1	1	1	1	1	1	1	1	1	1	1	1	1	0	1	1	1	1	1	1	1	1	1	1	1	1	1
Melanitta_fusca_GCA_029620185	Melanitta	Melanitta_fusca	GCA_029620185	1	1	1	1	1	1	1	1	1	1	1	1	1	1	1	1	1	1	1	1	1	1	1	1	1	1	1	1	1	1	1	1	1	1	1	1	1	1	1
Melanitta_nigra_D2006016004	Melanitta	Melanitta_nigra	D2006016004_NA	1	1	1	0	1	1	0	1	1	0	0	0	1	1	1	1	1	1	1	1	1	1	1	1	1	1	1	1	1	1	1	1	1	0	1	1	0	1	1
Melanitta_perspicillata_D1907004383	Melanitta	Melanitta_perspicillata	D1907004383_NA	1	1	1	1	1	1	0	1	1	0	0	0	1	1	1	1	1	1	1	1	1	1	1	1	1	1	1	1	1	1	1	1	1	0	1	1	1	1	1
Mergellus_albellus_B10K-D-WWT-19	Mergellus	Mergellus_albellus	B10K-D-WWT-19_NA	1	1	1	1	1	1	0	1	1	0	1	1	1	1	1	1	1	1	1	1	1	1	1	1	1	1	1	1	1	1	1	1	1	1	1	1	1	1	1
Mergellus_albellus_D2104051199	Mergellus	Mergellus_albellus	D2104051199_NA	1	0	1	1	1	1	0	0	1	0	0	0	1	0	1	1	0	1	1	1	1	1	0	1	1	0	1	1	0	1	1	1	1	0	0	0	1	0	1
Mergellus_albellus_D2104051214	Mergellus	Mergellus_albellus	D2104051214_NA	1	0	1	1	1	1	0	1	1	0	0	0	1	0	1	1	0	1	1	1	1	1	0	1	1	0	1	1	0	1	1	1	1	0	0	0	1	0	1
Mergus_merganser_D1907004324	Mergus	Mergus_merganser	D1907004324_NA	1	1	1	1	1	1	0	0	0	0	0	0	1	1	1	1	1	1	1	1	1	1	1	1	1	1	1	1	1	1	1	1	1	0	0	0	1	1	1
Mergus_serrator_D2006016306	Mergus	Mergus_serrator	D2006016306_NA	1	1	1	1	1	1	0	1	1	0	0	0	1	1	1	1	1	1	1	1	1	1	1	1	1	1	1	1	1	1	1	1	1	0	1	1	1	1	1
Neochen_jubata_B10K-D-WWT-20	Neochen	Neochen_jubata	B10K-D-WWT-20_NA	1	1	1	1	1	1	1	1	1	1	1	1	1	1	1	1	1	1	1	1	1	1	1	1	1	1	1	1	1	1	1	0	1	1	1	1	1	1	1
Neochen_jubata_D2102046032	Neochen	Neochen_jubata	D2102046032_NA	1	0	1	1	0	1	1	0	1	0	0	1	1	0	1	1	0	1	1	1	1	1	0	1	1	1	1	1	0	1	1	1	1	0	1	1	1	0	1
Netta_erythrophthalma_B10K-D-IZW-104	Netta	Netta_erythrophthalma	B10K-D-IZW-104_NA	1	1	1	1	1	1	1	1	1	1	1	1	1	1	1	1	1	1	1	1	1	1	1	1	1	1	1	1	1	1	1	1	1	1	1	1	1	1	1
Netta_peposaca_D1907004221	Netta	Netta_peposaca	D1907004221_NA	1	1	1	1	1	1	0	1	1	0	0	0	1	1	1	1	1	1	1	1	1	1	1	1	1	1	1	1	1	1	1	1	1	0	0	0	1	1	1
Netta_rufina_MOB-64	Netta	Netta_rufina	MOB-64_NA	1	1	1	1	1	1	0	1	1	0	1	1	1	1	1	1	1	1	1	1	1	1	1	1	1	1	1	1	1	1	1	1	1	0	1	1	1	1	1
Nettapus_auritus_GCA_011076525	Nettapus	Nettapus_auritus	GCA_011076525	1	1	1	1	1	1	1	1	1	1	1	1	1	1	1	1	1	1	1	1	1	1	1	1	1	1	1	1	1	1	1	1	1	1	1	1	1	1	1
Nomonyx_dominicus_D1907003520	Nomonyx	Nomonyx_dominicus	D1907003520_NA	1	1	1	1	1	1	0	1	1	0	0	0	1	1	1	1	1	1	1	1	1	1	1	1	1	1	1	1	1	1	1	1	1	1	1	1	0	1	1
Oxyura_jamaicensis_GCA_011077185	Oxyura	Oxyura_jamaicensis	GCA_011077185	1	1	1	1	1	1	1	1	1	1	1	1	1	1	1	1	1	1	1	1	1	1	1	1	1	1	1	1	1	1	1	1	1	1	1	1	1	1	1
Oxyura_leucocephala_B10K-D-IZW-106	Oxyura	Oxyura_leucocephala	B10K-D-IZW-106_NA	1	1	1	1	1	1	0	1	1	0	1	1	1	1	1	1	1	1	1	1	1	1	1	1	1	1	1	1	1	1	1	1	1	1	1	1	1	1	1
Plectropterus_gambensis_B10K-D-WWT-22	Plectropterus	Plectropterus_gambensis	B10K-D-WWT-22_NA	1	1	1	1	1	1	1	1	1	0	1	1	1	1	1	1	1	1	1	1	1	1	1	1	1	1	1	1	1	1	1	1	1	1	1	1	1	1	1
Polysticta_stelleri_D2301166173	Polysticta	Polysticta_stelleri	D2301166173_NA	1	1	1	1	1	1	1	1	1	0	1	1	1	1	1	1	1	1	1	1	1	1	1	1	1	1	1	1	1	1	1	1	1	1	1	1	1	1	1
Pteronetta_hartlaubii_D2102046034	Pteronetta	Pteronetta_hartlaubii	D2102046034_NA	1	1	1	1	1	1	0	1	1	0	1	1	1	1	1	1	1	1	1	1	1	1	1	1	1	1	1	1	1	1	1	1	1	0	1	1	0	1	1
Somateria_mollissima_CL100150685_L01	Somateria	Somateria_mollissima	CL100150685_L01	1	0	1	0	0	1	1	1	1	0	0	0	1	0	1	1	0	1	1	1	1	1	0	1	1	1	1	1	1	1	1	1	1	1	1	1	1	1	1
Somateria_mollissima_GCA_030142145	Somateria	Somateria_mollissima	GCA_030142145	1	0	1	1	0	1	0	0	0	1	0	1	1	0	1	1	0	1	1	1	1	1	0	1	1	1	1	1	0	1	1	1	1	1	0	1	1	0	1
Somateria_mollissima_GCA_951411735	Somateria	Somateria_mollissima	GCA_951411735	1	0	1	1	1	1	1	1	1	1	1	1	1	0	1	1	0	1	1	1	1	1	0	1	0	0	0	1	1	1	0	0	0	1	1	1	1	1	1
Somateria_mollissima_GCA_951416345	Somateria	Somateria_mollissima	GCA_951416345	1	1	1	1	0	1	0	0	0	1	0	1	1	1	1	1	1	1	1	1	1	1	1	1	0	0	0	1	1	1	0	0	0	1	1	1	1	0	1
Somateria_spectabilis_D2006016067	Somateria	Somateria_spectabilis	D2006016067_NA	1	1	1	1	1	1	0	1	1	0	1	1	1	1	1	1	1	1	1	1	1	1	1	1	1	1	1	1	1	1	1	1	1	1	1	1	1	1	1
Spatula_clypeata_D2212160216	Spatula	Spatula_clypeata	D2212160216_NA	1	1	1	1	1	1	1	1	1	0	0	0	1	1	1	1	1	1	1	1	1	1	1	1	1	1	1	1	1	1	1	1	1	0	1	1	1	1	1
Spatula_discors_GCA_032165275	Spatula	Spatula_discors	GCA_032165275	1	1	1	1	1	1	0	1	1	1	1	1	1	1	1	1	1	1	1	1	1	1	1	1	1	1	1	1	1	1	1	1	1	1	1	1	1	1	1
Spatula_platalea_D2007020414	Spatula	Spatula_platalea	D2007020414_NA	1	1	1	1	1	1	0	1	1	0	0	0	1	1	1	1	1	1	1	1	1	1	1	1	1	1	1	1	1	1	1	1	1	0	0	0	1	1	1
Spatula_querquedula_GCA_032191525	Spatula	Spatula_querquedula	GCA_032191525	1	1	1	1	1	1	1	1	1	1	1	1	1	1	1	1	1	1	1	1	1	1	1	1	1	1	1	1	1	1	1	1	1	1	1	1	1	1	1
Spatula_rhynchotis_GCA_034783165	Spatula	Spatula_rhynchotis	GCA_034783165	1	1	1	1	1	1	1	1	1	1	1	1	1	1	1	1	1	1	1	1	1	1	1	1	1	1	1	1	1	1	1	1	1	1	1	1	1	1	1
Spatula_smithii_GCA_035221675	Spatula	Spatula_smithii	GCA_035221675	1	1	1	1	1	1	1	1	1	1	1	1	1	1	1	1	1	1	1	1	1	1	1	1	1	1	1	1	1	1	1	1	1	1	1	1	1	1	1
Spatula_versicolor_D2007020420	Spatula	Spatula_versicolor	D2007020420_NA	1	1	1	1	1	1	0	1	1	0	0	0	1	1	1	1	1	1	1	1	1	1	1	1	1	1	1	1	1	1	1	1	1	0	0	0	1	1	1
Speculanas_specularis_D2102046036	Speculanas	Speculanas_specularis	D2102046036_NA	1	0	1	1	0	1	1	1	1	0	0	1	1	0	1	1	0	1	1	0	1	1	0	1	1	0	1	1	1	1	1	0	1	1	0	1	1	0	1
Speculanas_specularis_GCA_032165255	Speculanas	Speculanas_specularis	GCA_032165255	1	1	1	1	1	1	1	1	1	1	1	1	1	1	1	1	1	1	1	1	1	1	1	1	1	1	1	1	1	1	1	1	1	1	1	1	1	1	1
Stictonetta_naevosa_D2006016299	Stictonetta	Stictonetta_naevosa	D2006016299_NA	1	0	1	1	0	1	0	1	1	0	0	0	1	1	1	1	1	1	1	0	1	1	0	1	1	0	1	1	0	1	1	0	1	0	0	1	1	0	1
Stictonetta_naevosa_GCA_011074415	Stictonetta	Stictonetta_naevosa	GCA_011074415	1	1	1	1	1	1	0	1	1	0	0	0	1	1	1	1	1	1	1	1	1	1	1	1	1	1	1	1	1	1	1	1	1	1	1	1	1	1	1
Tachyeres_brachypterus_GCA_032357605	Tachyeres	Tachyeres_brachypterus	GCA_032357605	1	1	1	1	1	1	1	1	1	1	1	1	1	1	1	1	1	1	1	1	1	1	1	1	1	1	1	1	1	1	1	1	1	1	1	1	1	1	1
Tachyeres_leucocephalus_GCA_034780855	Tachyeres	Tachyeres_leucocephalus	GCA_034780855	1	1	1	1	1	1	1	1	1	1	1	1	1	1	1	1	1	1	1	1	1	1	1	1	1	1	1	1	1	1	1	1	1	1	1	1	1	1	1
Tachyeres_pteneres_D2102046038	Tachyeres	Tachyeres_pteneres	D2102046038_NA	1	1	1	1	1	1	1	1	1	0	0	0	1	1	1	1	1	1	1	1	1	1	1	1	1	1	1	1	1	1	1	1	1	1	1	1	0	1	1
Tadorna_cana_B10K-D-IZW-124	Tadorna	Tadorna_cana	B10K-D-IZW-124_NA	1	1	1	1	1	1	0	1	1	1	1	1	1	1	1	1	1	1	1	1	1	1	1	1	1	1	1	1	1	1	1	1	1	1	1	1	0	0	0
Tadorna_tadorna_B10K-D-WWT-25	Tadorna	Tadorna_tadorna	B10K-D-WWT-25_NA	1	1	1	1	1	1	0	1	1	1	0	1	1	1	1	1	1	1	1	1	1	1	1	1	1	1	1	1	1	1	1	0	1	1	0	1	1	1	1
Tadorna_tadorna_D2110088457	Tadorna	Tadorna_tadorna	D2110088457_NA	1	0	1	1	0	1	0	0	0	0	0	0	1	0	1	1	0	1	1	1	1	1	0	1	1	0	1	1	0	1	1	0	1	0	0	0	0	0	1
Tadorna_tadorna_DBGNRM58	Tadorna	Tadorna_tadorna	DBGNRM58_NA	1	0	1	1	0	1	1	1	1	1	1	1	1	0	1	1	0	1	1	1	1	1	0	1	1	0	1	1	0	1	1	1	1	0	1	1	1	0	1
Tadorna_variegata_D2007020370	Tadorna	Tadorna_variegata	D2007020370_NA	1	1	1	1	1	1	0	1	1	0	0	0	1	1	1	1	1	1	1	1	1	1	1	1	1	1	1	1	1	1	1	1	1	0	1	1	1	1	1
Thalassornis_leuconotus_D2102046040	Thalassornis	Thalassornis_leuconotus	D2102046040_NA	1	1	1	1	1	1	1	1	1	1	1	1	1	1	1	1	1	1	1	1	1	1	1	1	1	1	1	1	1	1	1	1	1	0	1	1	1	1	1

## Sheet: ST3 Genus annotation summary
Supplementary Table 3. Summary of proteins in dataset 1 and dataset 2 by genus. DS1 is Dataset 1 containing sequences 70% complete. DS2 is Dataset 2, containing only unique sequences at the species level.
Genus	# Genome	# Species	# Albumin in DS1	# Albumin in DS2	# BPIfoldB4 in DS1	# BPIfoldB4 in DS2	# Clusterin in DS1	# Clusterin in DS2	# COL1a1 in DS1	# COL1a1 in DS2	# COL1a2 in DS1	# COL1a2 in DS2	# Lactadherin in DS1	# Lactadherin in DS2	# OC116 in DS1	# OC116 in DS2	# Ovalbumin in DS1	# Ovalbumin in DS2	# Ovocalyxin32 in DS1	# Ovocalyxin32 in DS2	# Ovomucoid in DS1	# Ovomucoid in DS2	# Ovotransferrin in DS1	# Ovotransferrin in DS2	# XCA1 in DS1	# XCA1 in DS2	# XCA2 in DS1	# XCA2 in DS2
Aix	4	1	4	2	4	2	2	2	3	3	4	3	3	3	4	3	3	2	4	3	3	2	4	1	3	2	4	3
Alopochen	1	1	1	1	1	1	0	1	0	1	1	1	1	1	1	1	1	1	1	1	1	1	1	1	1	1	1	1
Amazonetta	1	1	1	1	1	1	0	1	0	0	1	1	1	1	1	1	1	1	1	1	1	1	1	1	1	1	0	1
Anas	29	13	29	13	29	18	18	18	18	8	28	14	29	16	29	26	27	16	28	20	29	14	29	17	22	18	24	16
Anser	14	8	14	8	14	11	5	7	9	6	12	9	13	9	13	13	14	9	14	10	14	9	14	9	10	6	11	8
Asarcornis	1	1	1	1	1	1	1	1	1	1	1	1	1	1	1	1	1	1	1	1	1	1	1	1	1	1	1	1
Aythya	9	8	9	8	9	9	8	9	5	7	9	8	9	9	9	8	9	8	8	9	9	8	9	8	6	6	8	8
Branta	8	6	8	8	8	7	0	5	3	4	8	6	8	7	8	8	8	6	8	7	8	6	8	8	4	6	8	6
Bucephala	2	2	2	2	2	2	1	2	0	2	2	2	2	2	2	2	2	2	2	2	2	2	2	2	1	1	2	2
Cairina	2	1	2	1	2	1	2	1	1	1	1	1	2	1	2	1	2	1	2	2	2	1	2	1	2	1	2	1
Callonetta	1	1	1	1	1	1	0	1	0	0	1	1	1	1	1	1	1	1	1	1	1	1	1	1	0	0	1	1
Cereopsis	1	1	1	1	1	1	0	1	1	1	1	1	1	1	1	1	1	1	1	1	1	1	1	1	1	1	1	1
Chenonetta	1	1	1	1	0	1	0	1	0	0	1	1	1	1	1	1	1	1	1	1	1	1	1	1	0	0	1	1
Chloephaga	7	5	7	6	7	6	4	6	2	4	7	6	7	6	7	7	7	7	7	7	7	5	7	7	4	5	6	5
Clangula	2	1	2	1	2	2	0	1	0	1	2	2	1	1	1	1	2	1	2	1	2	2	2	1	1	1	1	1
Coscoroba	1	1	1	1	1	1	0	1	0	0	1	1	1	1	1	1	1	1	1	1	1	1	1	1	0	0	1	1
Cyanochen	1	1	1	1	1	1	1	1	1	1	1	1	1	1	1	1	1	1	1	1	1	1	1	1	1	1	1	1
Cygnus	8	6	8	6	8	7	3	3	8	7	8	7	8	8	8	8	8	7	8	6	7	6	7	6	7	6	6	6
Dendrocygna	6	6	6	6	6	6	2	6	4	6	6	6	6	6	6	6	6	6	6	6	6	6	6	6	6	6	6	6
Heteronetta	2	1	2	1	2	1	1	1	2	1	2	1	2	1	2	1	2	1	2	1	2	1	2	1	2	1	2	1
Histrionicus	1	1	1	1	1	1	0	1	0	0	1	1	1	1	1	1	1	1	1	1	1	1	1	1	1	1	1	1
Lophodytes	1	1	1	1	1	1	1	1	1	1	1	1	1	1	1	1	1	1	1	1	1	1	1	1	1	1	1	1
Lophonetta	2	1	2	1	2	2	1	1	1	1	2	1	2	1	2	2	2	1	2	2	2	2	2	2	2	1	2	1
Mareca	7	5	7	6	7	7	7	7	4	4	7	6	7	5	7	7	7	5	7	5	7	5	7	7	6	6	7	5
Marmaronetta	1	1	1	1	1	1	1	1	0	0	1	1	1	1	1	1	1	1	1	1	1	1	1	1	0	0	1	1
Melanitta	5	4	5	4	4	4	3	5	1	3	5	4	5	5	5	5	5	4	5	4	5	4	5	5	3	5	4	4
Mergellus	3	1	3	1	3	3	0	2	0	1	3	1	3	1	3	3	3	1	3	1	3	1	3	3	1	1	3	1
Mergus	2	2	2	2	2	2	0	1	0	0	2	2	2	2	2	2	2	2	2	2	2	2	2	2	0	1	2	2
Neochen	2	1	2	1	2	1	2	1	1	1	2	1	2	1	2	2	2	1	2	2	2	1	2	1	1	2	2	1
Netta	3	3	3	3	3	3	1	3	1	2	3	3	3	3	3	3	3	3	3	3	3	3	3	3	1	2	3	3
Nettapus	1	1	1	1	1	1	1	1	1	1	1	1	1	1	1	1	1	1	1	1	1	1	1	1	1	1	1	1
Nomonyx	1	1	1	1	1	1	0	1	0	0	1	1	1	1	1	1	1	1	1	1	1	1	1	1	1	1	0	1
Oxyura	2	2	2	2	2	2	1	2	1	2	2	2	2	2	2	2	2	2	2	2	2	2	2	2	2	2	2	2
Plectropterus	1	1	1	1	1	1	1	1	0	1	1	1	1	1	1	1	1	1	1	1	1	1	1	1	1	1	1	1
Polysticta	1	1	1	1	1	1	1	1	0	1	1	1	1	1	1	1	1	1	1	1	1	1	1	1	1	1	1	1
Pteronetta	1	1	1	1	1	1	0	1	0	1	1	1	1	1	1	1	1	1	1	1	1	1	1	1	0	1	0	1
Somateria	5	2	5	2	4	2	2	3	3	2	5	2	5	2	5	5	5	2	3	3	5	4	3	3	5	4	5	3
Spatula	7	7	7	7	7	7	4	7	4	4	7	7	7	7	7	7	7	7	7	7	7	7	7	7	4	5	7	7
Speculanas	2	1	2	1	2	1	2	2	1	1	2	1	2	1	2	1	2	1	2	1	2	2	2	1	2	1	2	1
Stictonetta	2	1	2	1	2	1	0	2	0	0	2	2	2	2	2	1	2	1	2	1	2	1	2	1	1	1	2	1
Tachyeres	3	3	3	3	3	3	3	3	2	2	3	3	3	3	3	3	3	3	3	3	3	3	3	3	3	3	2	3
Tadorna	5	3	5	3	5	3	1	4	3	2	5	3	5	3	5	5	5	3	5	3	5	3	5	3	2	3	3	2
Thalassornis	1	1	1	1	1	1	1	1	1	1	1	1	1	1	1	1	1	1	1	1	1	1	1	1	0	1	1	1
Grand Total	160	160	160	116	157	130	81	121	83	85	156	120	157	124	158	149	157	119	156	130	158	119	157	127	112	109	140	116

## Sheet: ST4 Variation summary
Supplementary Table 4 Summary of inter- and intra-taxon mean distances and intraspecies SAPs
protein	prot_length	intergenus	interspecies	intraspecies	intergenus	interspecies	intraspecies	species_mi*	number of species_mi with intraspecies SAPS	percentage of species_mi with intraspecies SAPS
		Mean inter-taxon pairwise distance			Average number of SAPs based on mean pairwise distance
Albumin	615	0.15	0.04	0	13.8	1	0	27	4	14.8148
BPIfoldB4	459	0.18	0.07	0.03	14.9	2.2	0.4	27	13	48.1481
COL1a1	1014	0.01	0.01	0	0.1	0.1	0	11	2	18.1818
COL1a2	1014	0.06	0.01	0	3.7	0.1	0	26	3	11.5385
Clusterin	448	0.28	0.1	0.08	35.1	4.5	2.9	14	9	64.2857
Lactadherin	474	0.11	0.03	0.01	5.7	0.4	0	25	11	44
OC116	644	0.28	0.14	0.1	50.5	12.6	6.4	26	20	76.9231
Ovalbumin	386	0.16	0.04	0.01	9.9	0.6	0	26	6	23.0769
Ovocalyxin32	278	0.24	0.08	0.04	16	1.8	0.4	27	9	33.3333
Ovomucoid	205	0.18	0.03	0.01	6.6	0.2	0	25	7	28
Ovotransferrin	705	0.19	0.06	0.02	25.5	2.5	0.3	26	13	50
XCA1	157	0.22	0.11	0.07	7.6	1.9	0.8	17	4	23.5294
XCA2	168	0.2	0.05	0.02	6.7	0.4	0.1	23	6	26.087
* species_mi=number of species with more than one genome

## Sheet: ST5 Figure 1 index
Supplementary Table 5. Genome label index for Figure 1.
Index	Genome_ID
1	Anas_zonorhyncha_GCA_002224875
2	Anas_platyrhynchos_GCA_037218355
3	Anas_platyrhynchos_GCA_032352815
4	Anas_platyrhynchos_GCA_017639305
5	Anas_platyrhynchos_GCA_002743455
6	Anas_platyrhynchos_GCA_008746955
7	Anas_melleri_B10K-D-IZW-60
8	Anas_platyrhynchos_bAnaPla2-hap2
9	Anas_platyrhynchos_bAnaPla2-hap1
10	Anas_superciliosa_D2006016005
11	Anas_undulata_B10K-D-IZW-61
12	Anas_platyrhynchos_GCA_015476345
13	Anas_platyrhynchos_GCA_003850225
14	Anas_platyrhynchos_GCA_017639285
15	Anas_platyrhynchos_GCA_900411745
16	Anas_platyrhynchos_GCA_000355885
17	Anas_platyrhynchos_GCA_002224895
18	Anas_fulvigula_D2005012408
19	Anas_luzonica_B10K-D-IZW-59
20	Anas_platyrhynchos_GCA_030704485
21	Anas_acuta_GCA_963932075
22	Anas_acuta_GCA_036026395
23	Anas_acuta_GCA_963932015
24	Anas_georgica_GCA_032275265
25	Anas_bahamensis_D2007020419
26	Anas_bernieri_GCA_032165215
27	Anas_bernieri_B10K-D-IZW-58
28	Anas_gibberifrons_D2007020344
29	Anas_capensis_GCA_032357685
30	Mareca_sibilatrix_GCA_034783215
31	Mareca_americana_GCA_035588595
32	Mareca_penelope_GCA_036026335
33	Mareca_americana_D2212160205
34	Mareca_strepera_GCA_035583915
35	Mareca_strepera_DBGNRM54
36	Mareca_falcata_D2006016302
37	Spatula_smithii_GCA_035221675
38	Spatula_rhynchotis_GCA_034783165
39	Spatula_clypeata_D2212160216
40	Spatula_platalea_D2007020414
41	Spatula_discors_GCA_032165275
42	Spatula_querquedula_GCA_032191525
43	Spatula_versicolor_D2007020420
44	Speculanas_specularis_GCA_032165255
45	Speculanas_specularis_D2102046036
46	Amazonetta_brasiliensis_D2007020470
47	Lophonetta_specularioides_GCA_032165235
48	Lophonetta_specularioides_B10K-D-WWT-17
49	Tachyeres_pteneres_D2102046038
50	Tachyeres_leucocephalus_GCA_034780855
51	Tachyeres_brachypterus_GCA_032357605
52	Aythya_marila_GCA_029042245
53	Aythya_fuligula_GCA_009819795
54	Aythya_fuligula_GCA_009819845
55	Aythya_affinis_CL200153793_L02
56	Aythya_nyroca_MOB-23
57	Aythya_baeri_GCA_026413565
58	Aythya_ferina_D1907000514
59	Aythya_americana_D2006016050
60	Aythya_collaris_D1907001858
61	Netta_peposaca_D1907004221
62	Netta_erythrophthalma_B10K-D-IZW-104
63	Netta_rufina_MOB-64
64	Asarcornis_scutulata_GCA_013398475
65	Marmaronetta_angustirostris_D1907004224
66	Pteronetta_hartlaubii_D2102046034
67	Cyanochen_cyanoptera_B10K-D-WWT-10
68	Chenonetta_jubata_D2007020407
69	Aix_sponsa_B10K-D-WWT-1
70	Aix_sponsa_GCA_032270905
71	Aix_galericulata_GCA_024635365
72	Aix_galericulata_CL100153795_L01
73	Cairina_moschata_GCA_018104995
74	Cairina_moschata_GCA_009194515
75	Chloephaga_rubidiceps_D2104051194
76	Chloephaga_poliocephala_B10K-D-IZW-11
77	Chloephaga_picta_B10K-D-WWT-7
78	Chloephaga_picta_B10K-D-IZW-10
79	Chloephaga_hybrida_D2104051195
80	Neochen_jubata_D2102046032
81	Neochen_jubata_B10K-D-WWT-20
82	Chloephaga_melanoptera_B10K-D-WWT-5
83	Chloephaga_melanoptera_B10K-D-IZW-12
84	Tadorna_tadorna_DBGNRM58
85	Tadorna_tadorna_B10K-D-WWT-25
86	Tadorna_tadorna_D2110088457
87	Tadorna_variegata_D2007020370
88	Tadorna_cana_B10K-D-IZW-124
89	Alopochen_aegyptiaca_D1907004292
90	Mergellus_albellus_D2104051214
91	Mergellus_albellus_D2104051199
92	Mergellus_albellus_B10K-D-WWT-19
93	Mergus_serrator_D2006016306
94	Mergus_merganser_D1907004324
95	Lophodytes_cucullatus_B10K-D-WWT-15
96	Bucephala_islandica_D1907003562
97	Bucephala_clangula_DBGNRM73
98	Polysticta_stelleri_D2301166173
99	Melanitta_fusca_GCA_029620185
100	Melanitta_perspicillata_D1907004383
101	Melanitta_nigra_D2006016004
102	Melanitta_americana_D2208137246
103	Melanitta_americana_D2212160212
104	Histrionicus_histrionicus_D1907004311
105	Somateria_mollissima_GCA_951416345
106	Somateria_mollissima_CL100150685_L01
107	Somateria_mollissima_GCA_030142145
108	Somateria_spectabilis_D2006016067
109	Somateria_mollissima_GCA_951411735
110	Clangula_hyemalis_GCA_029619115
111	Clangula_hyemalis_B10K-D-DBG-162
112	Plectropterus_gambensis_B10K-D-WWT-22
113	Callonetta_leucophrys_D1907004294
114	Oxyura_leucocephala_B10K-D-IZW-106
115	Oxyura_jamaicensis_GCA_011077185
116	Nomonyx_dominicus_D1907003520
117	Heteronetta_atricapilla_GCA_011075105
118	Heteronetta_atricapilla_B10K-D-WWT-13
119	Stictonetta_naevosa_GCA_011074415
120	Stictonetta_naevosa_D2006016299
121	Nettapus_auritus_GCA_011076525
122	Anser_rossii_D1907004357
123	Anser_brachyrhynchus_GCA_002592135
124	Anser_fabalis_DBGNRM71
125	Anser_albifrons_DBG-30
126	Anser_cygnoides_GCA_002166845
127	Anser_cygnoides_GCA_000971095
128	Anser_cygnoides_GCA_025388735
129	Anser_cygnoides_GCA_030515125
130	Anser_cygnoides_GCA_026259575
131	Anser_cygnoides_GCA_013030995
132	Anser_anser_DBG-36
133	Anser_erythropus_DBGNRM61
134	Anser_indicus_GCA_025583725
135	Anser_indicus_GCA_006229135
136	Branta_leucopsis_DBGNRM65
137	Branta_hutchinsii_GCA_032270845
138	Branta_hutchinsii_B10K-D-MSB-25
139	Branta_canadensis_GCA_006130075
140	Branta_sandvicensis_D2007017072
141	Branta_canadensis_D2110088454
142	Branta_bernicla_D2007020471
143	Branta_ruficollis_D2104051282
144	Cygnus_cygnus_DBG88
145	Cygnus_columbianus_DBG-71
146	Cygnus_cygnus_GCA_014362685
147	Cygnus_buccinator_GCA_019232035
148	Cygnus_olor_GCA_009769625
149	Cygnus_olor_GCA_009769485
150	Cygnus_atratus_GCA_013377495
151	Cygnus_melancoryphus_CL100153795_L02
152	Coscoroba_coscoroba_D2102046636
153	Cereopsis_novaehollandiae_B10K-D-IZW-75
154	Dendrocygna_javanica_B10K-D-IZW-86
155	Dendrocygna_bicolor_B10K-D-IZW-84
156	Dendrocygna_viduata_CL100160616_L02
157	Dendrocygna_guttata_B10K-D-IZW-85
158	Dendrocygna_autumnalis_B10K-D-USNM-95
159	Dendrocygna_arborea_B10K-D-IZW-83
160	Thalassornis_leuconotus_D2102046040

## Sheet: ST6 Annotation check
Supplementary Table 6. Summary of annotation comparison with RefSeq sequences. Highlighted in red are specifically mentioned in discussion. * denotes where some or all of the additional sequence appears to be erroneous.
	GCF_015476345.1 (Anas platyrhynchos)	curated sequence differences	additional amino acids in RefSeq	additional amino acids in this study	GCF_009819795.1 (Aythya fuligula)	curated sequence differences	additional amino acids in RefSeq	additional amino acids in this study	GCF_013377495.2 (Cygnus atratus)	curated sequence differences	additional amino acids in RefSeq	additional amino acids in this study	GCF_009769625.2 (Cygnus olor)	curated sequence differences	additional amino acids in RefSeq	additional amino acids in this study	GCF_011077185.1 (Oxyura jamaicensis)	curated sequence differences	additional amino acids in RefSeq	additional amino acids in this study
COL1a1	XP_038024652.1	0	0	0	No RefSeq	NA	NA	NA	XP_035424404.1	0	0	0	XP_040392464.1	0	30*	0	XP_035168967.1	0	65*	355*
COL1a2	XP_038029841.1	3	0	0	XP_032036607.1	3	0	0	XP_035401443.1	10	0	0	XP_040405539.1	10	0	0	XP_035173067.1	10	0	0
XCA1	XP_038021737.1	1	46*	0	XP_032041511.1	0	0	0	XP_035425210.1	0	0	0	XP_040400689.1	0	0	0	XP_035169393.1	0	0	0
XCA2	XP_038024161.1	0	0	0	XP_032037982.1	0	0	0	XP_035425211.1	0	0	3	No annotation	NA	NA	NA	XP_035169392.1	0	0	0
OC116	XP_038034818.1	0	0	0	No annotation	NA	NA	NA	XP_035410799.1	0	17	0	XP_040411700.1	0	17	0	XP_035180565.1	0	0	0
Albumin	No RefSeq	NA	NA	NA	XP_032042812.1	0	0	0	XP_035406157.1	0	0	0	XP_040410421.1	0	0	0	XP_035179894.1	0	0	0
BPI-fold-B4	XP_012947067.1	0	0	0	XP_032054513.1	0	0	0	XP_035423100.1	0	0	0	XP_040431892.1	0	0	0	XP_035200009.1	0	0	0
Clusterin	No annotation	NA	NA	NA	XP_032041356.1	0	0	0	No annotation	NA	NA	NA	XP_040408209.1	0	14*	0	XP_035170062.1	0	3*	0
Lactadherin	XP_027321929.1	0	0	0	XP_032051138.1	0	0	0	XP_035410505.1	0	0	0	XP_040425859.1	0	0	0	XP_035191990.1	0	0	0
Ovalbumin	NP_001298098.1	0	0	0	XP_032038406.1	0	41*	0	XP_035408641.1	0	0	0	No RefSeq	NA	NA	NA	XP_035175090.1	0	0	0
Ovocalyxin 32	XP_027319708.1	0	0	0	XP_032049472.1	0	0	0	XP_035422339.1	0	0	0	XP_040423632.1	0	0	0	XP_035190145.1	0	0	0
Ovomucoid	XP_038042576.1	0	44	23	XP_032053045.1	0	0	0	No RefSeq	NA	NA	NA	XP_040429709.1	0	88	0	XP_035194697.1	0	7*	23
Ovotransferrin	XP_005028125.1	0	0	0	XP_032049143.1	0	291	0	XP_035400822.2	0	1	0	XP_040423237.1	0	327	0	XP_035190671.1	0	323	0

## Sheet: ST7 Non_duckgenomes
Supplementary Table 7. Non-Anatidae genomes annotated for the OC116 protein
Genus	Species	Genome ID
Accipiter	gentilis	GCA_012487025.1
Accipiter	gentilis	GCA_017309825.1
Accipiter	gentilis	GCA_025727775.1
Accipiter	gentilis	GCA_929443795.1
Accipiter	gentilis	GCA_929443795.2
Accipiter	gentilis	GCA_929447715.1
Lycocorax	pyrrhopterus	GCA_014706015.1
Lycocorax	pyrrhopterus	GCA_014706025.1
Lycocorax	pyrrhopterus	GCA_014706035.1
Lycocorax	pyrrhopterus	GCA_014706055.1
Lycocorax	pyrrhopterus	GCA_014706265.1
Lycocorax	pyrrhopterus	GCA_014706275.1
Lycocorax	pyrrhopterus	GCA_014706285.1
Lycocorax	pyrrhopterus	GCA_014706295.1
Lycocorax	pyrrhopterus	GCA_014706395.1
Lycocorax	pyrrhopterus	GCA_015343275.1
Rhynochetos	jubatus	GCA_013398095.1
Rhynochetos	jubatus	GCA_027574665.1
Grus	americana	GCA_028858595.1
Grus	americana	GCA_028858705.1
Grus	americana	GCA_013390085.1
Pelecanus	crispus	GCA_030449815.1
Pelecanus	crispus	GCA_030463565.1
Pelecanus	crispus	B10K-D-DBG-123
Pelecanus	crispus	GCA_000687375.1
Calidris	pugnax	GCA_001458055.1
Calidris	pugnax	GCA_036321225.1*
Calidris	pugnax	GCA_036321245.1
Calidris	pugnax	GCA_001431845.1
Chlamydotis	macqueenii	GCA_011799995.1
Chlamydotis	macqueenii	GCA_011800025.1
Chlamydotis	macqueenii	GCA_036417535.1
Chlamydotis	macqueenii	GCA_036418225.1
Chlamydotis	macqueenii	GCA_000695195.1*
*no proteins were successfully annotated

## Sheet: ST8 OC116 non duck
Supplementary Table 8. Summary of non-Anatidae OC116 protein sequences and intraspecies SAPs
Order	Species	# seq	# SAPs	Annotated with
Accipitriformes	Northern goshawk (Accipiter gentilis)	6	6	Accipiter
Charadriiformes	Ruff (Calidris pugnax)	3	0	Rissa
Gruiformes	Kagu (Rhynochetos jubatus)	2	3	Rissa
Gruiformes	Whooping crane (Grus americana)	3	0	Grus
Otidiformes	MacQueen's bustard (Chlamydotis macqueenii)	4	2*	Accipiter
Passeriformes	Obi paradise-crow (Lycocorax pyrrhopterus obiensis)	10	5	Aphelocoma
Pelecaniformes	Dalmatian pelican (Pelecanus crispus)	4	2*	Rissa
* portions of the sequence were missing or lacked consensus
