# Supplementary material for: New avian protein sequences improve resolution of palaeoproteomic approaches to taxonomic identification &amp; reveal widespread intraspecies variability
Source: Research Square preprint supplement (doi:10.21203/rs.3.rs-5880462/v1), 2025-02-12
Supplement: Supplementary file 2 [file 55ae403a8a5e206aca53e92a.xlsx]

## Sheet: ST14 sample148_spider.proteins
Supplementary Table 14. PEAKS 11 proteins output for reanalysis of LC-MS/MS data of MC148
Protein Group	Top	Accession	-10LgP	Coverage(%)	Coverage(%) sample148	#Peptides	Area sample148	#Unique	#Spec sample148	PTM	Average Mass	Description
34	TRUE	AnsAna_Spatula_discors_GCA_032165275.1.Albumin_Anas.consensus	71.3067	1.3	1.3	1	219000	1	1		69873.1	>AnsAna_Spatula_discors_GCA_032165275.1.Albumin_Anas.consensus
34	TRUE	AnsAna_Branta_ruficollis_D2104051282.Albumin_Anas.consensus	71.3067	1.3	1.3	1	219000	1	1		69879	>AnsAna_Branta_ruficollis_D2104051282.Albumin_Anas.consensus
34	TRUE	AnsAna_Pteronetta_hartlaubii_D2102046034.Albumin_Anas.consensus	71.3067	1.3	1.3	1	219000	1	1		69759.9	>AnsAna_Pteronetta_hartlaubii_D2102046034.Albumin_Anas.consensus
34	TRUE	AnsAna_Chloephaga_hybrida_D2104051195.Albumin_Anas.consensus	71.3067	1.3	1.3	1	219000	1	1		69801.1	>AnsAna_Chloephaga_hybrida_D2104051195.Albumin_Anas.consensus
34	TRUE	AnsAna_Bucephala_islandica_D1907003562.Albumin_Anas.consensus	71.3067	1.3	1.3	1	219000	1	1		69832	>AnsAna_Bucephala_islandica_D1907003562.Albumin_Anas.consensus
1	FALSE	AnsAna_Aix_galericulata_GCA_024635365.1.COL1a1_Cyg-Gall.consensus	549.096	58.59	58.59	175		0	692	Deamidation (NQ); Proline Oxidation	136316	>AnsAna_Aix_galericulata_GCA_024635365.1.COL1a1_Cyg-Gall.consensus
1	FALSE	AnsAna_Heteronetta_atricapilla_B10K-D-WWT-13.COL1a1_Cyg-Gall.consensus	553.431	67.19	67.19	182		0	700	Deamidation (NQ); Proline Oxidation	120267	>AnsAna_Heteronetta_atricapilla_B10K-D-WWT-13.COL1a1_Cyg-Gall.consensus
1	FALSE	AnsAna_Aythya_americana_D2006016050.COL1a1_Cyg-Gall.consensus	533.048	65.75	65.75	150		0	597	Deamidation (NQ); Proline Oxidation	102270	>AnsAna_Aythya_americana_D2006016050.COL1a1_Cyg-Gall.consensus
2	FALSE	AnsAna_Spatula_smithii_GCA_035221675.1.COL1a2_Anas.consensus	567.775	58.4	58.4	201		0	574	Deamidation (NQ); Dehydration; Proline Oxidation; Proline oxidation to pyroglutamic acid	128882	>AnsAna_Spatula_smithii_GCA_035221675.1.COL1a2_Anas.consensus
2	FALSE	AnsAna_Melanitta_americana_D2212160212.COL1a2_Anas.consensus	566.436	56.68	56.68	198		0	571	Deamidation (NQ); Dehydration; Proline Oxidation; Proline oxidation to pyroglutamic acid	126271	>AnsAna_Melanitta_americana_D2212160212.COL1a2_Anas.consensus
1	TRUE	AnsAna_Aythya_marila_GCA_029042245.1.COL1a1_Cyg-Gall.consensus	556.228	62.08	62.08	193	166000000	4	750	Ala->Cys substitution; Ala->Phe substitution; Ala->Ser substitution; Deamidation (NQ); Ile->Met substitution; more	137758	>AnsAna_Aythya_marila_GCA_029042245.1.COL1a1_Cyg-Gall.consensus
2	FALSE	AnsAna_Somateria_mollissima_GCA_951416345.1.COL1a2_Anas.consensus	566.436	55.69	55.69	198		0	572	Deamidation (NQ); Dehydration; Proline Oxidation; Proline oxidation to pyroglutamic acid	128872	>AnsAna_Somateria_mollissima_GCA_951416345.1.COL1a2_Anas.consensus
7	TRUE	AnsAna_Stictonetta_naevosa_GCA_011074415.1.COL1a2_Anas.consensus	566.124	58.91	58.91	198		0	590	Ala->Cys substitution; Ala->Ser substitution; Deamidation (NQ); Dehydration; Glu->Gln substitution; more	128855	>AnsAna_Stictonetta_naevosa_GCA_011074415.1.COL1a2_Anas.consensus
2	FALSE	AnsAna_Anas_platyrhynchos_GCA_015476345.1.COL1a2_Anas.consensus	567.775	58.4	58.4	201		0	576	Deamidation (NQ); Dehydration; Proline Oxidation; Proline oxidation to pyroglutamic acid	128882	>AnsAna_Anas_platyrhynchos_GCA_015476345.1.COL1a2_Anas.consensus
2	FALSE	AnsAna_Aythya_ferina_D1907000514.COL1a2_Anas.consensus	568.392	59.97	59.97	204		0	608	Ala->Cys substitution; Ala->Ser substitution; Deamidation (NQ); Dehydration; Glu->Gln substitution; more	126311	>AnsAna_Aythya_ferina_D1907000514.COL1a2_Anas.consensus
34	TRUE	AnsAna_Chloephaga_melanoptera_B10K-D-IZW-12.Albumin_Anas.consensus	71.3067	1.3	1.3	1	219000	1	1		69797	>AnsAna_Chloephaga_melanoptera_B10K-D-IZW-12.Albumin_Anas.consensus
34	TRUE	AnsAna_Somateria_mollissima_GCA_951416345.1.Albumin_Anas.consensus	71.3067	1.3	1.3	1	219000	1	1		69978.1	>AnsAna_Somateria_mollissima_GCA_951416345.1.Albumin_Anas.consensus
1	FALSE	AnsAna_Nettapus_auritus_GCA_011076525.1.COL1a1_Cyg-Gall.consensus	551.971	68.67	68.67	179		0	696	Deamidation (NQ); Proline Oxidation	110509	>AnsAna_Nettapus_auritus_GCA_011076525.1.COL1a1_Cyg-Gall.consensus
34	TRUE	AnsAna_Anser_erythropus_DBGNRM61.Albumin_Anas.consensus	71.3067	1.3	1.3	1	219000	1	1		69854	>AnsAna_Anser_erythropus_DBGNRM61.Albumin_Anas.consensus
2	FALSE	AnsAna_Aix_sponsa_GCA_032270905.1.COL1a2_Anas.consensus	558.406	53.98	53.98	182		0	526	Deamidation (NQ); Dehydration; Proline Oxidation; Proline oxidation to pyroglutamic acid	127285	>AnsAna_Aix_sponsa_GCA_032270905.1.COL1a2_Anas.consensus
2	FALSE	AnsAna_Anas_georgica_GCA_032275265.1.COL1a2_Anas.consensus	567.775	58.4	58.4	201		0	575	Deamidation (NQ); Dehydration; Proline Oxidation; Proline oxidation to pyroglutamic acid	128928	>AnsAna_Anas_georgica_GCA_032275265.1.COL1a2_Anas.consensus
34	TRUE	AnsAna_Dendrocygna_autumnalis_B10K-D-USNM-95.Albumin_Anas.consensus	71.3067	1.3	1.3	1	219000	1	1		69977.1	>AnsAna_Dendrocygna_autumnalis_B10K-D-USNM-95.Albumin_Anas.consensus
1	FALSE	AnsAna_Asarcornis_scutulata_GCA_013398475.1.COL1a1_Cyg-Gall.consensus	542.117	58.62	58.62	169	77100000	3	645	Ala->Cys substitution; Ala->Phe substitution; Ala->Ser substitution; Deamidation (NQ); Ile->Met substitution; more	129615	>AnsAna_Asarcornis_scutulata_GCA_013398475.1.COL1a1_Cyg-Gall.consensus
35	TRUE	#CONTAM#sp|TRYP_PIG|	70.748	3.46	3.46	1	410000	1	1		24409.5	>sp|TRYP_PIG|
34	TRUE	AnsAna_Branta_canadensis_GCA_006130075.1.Albumin_Anas.consensus	71.3067	1.3	1.3	1	219000	1	1		69911	>AnsAna_Branta_canadensis_GCA_006130075.1.Albumin_Anas.consensus
34	TRUE	AnsAna_Cygnus_buccinator_GCA_019232035.1.Albumin_Anas.consensus	71.3067	1.3	1.3	1	219000	1	1		69959.1	>AnsAna_Cygnus_buccinator_GCA_019232035.1.Albumin_Anas.consensus
1	FALSE	AnsAna_Bucephala_islandica_D1907003562.COL1a1_Cyg-Gall.consensus	436.605	48.13	48.13	57		0	266	Deamidation (NQ); Proline Oxidation	46000.7	>AnsAna_Bucephala_islandica_D1907003562.COL1a1_Cyg-Gall.consensus
2	FALSE	AnsAna_Anas_bernieri_B10K-D-IZW-58.COL1a2_Anas.consensus	567.775	59.45	59.45	201		0	575	Deamidation (NQ); Dehydration; Proline Oxidation; Proline oxidation to pyroglutamic acid	126281	>AnsAna_Anas_bernieri_B10K-D-IZW-58.COL1a2_Anas.consensus
18	FALSE	AnsAna_Branta_canadensis_GCA_006130075.1.COL1a2_Anas.consensus	547.579	55.1	55.1	172		0	449	Deamidation (NQ); Dehydration; Proline Oxidation; Val->Gln substitution	128976	>AnsAna_Branta_canadensis_GCA_006130075.1.COL1a2_Anas.consensus
1	FALSE	AnsAna_Dendrocygna_javanica_B10K-D-IZW-86.COL1a1_Cyg-Gall.consensus	545.247	63.98	63.98	167		0	609	Deamidation (NQ); Proline Oxidation	118665	>AnsAna_Dendrocygna_javanica_B10K-D-IZW-86.COL1a1_Cyg-Gall.consensus
34	TRUE	AnsAna_Speculanas_specularis_GCA_032165255.1.Albumin_Anas.consensus	71.3067	1.3	1.3	1	219000	1	1		69837	>AnsAna_Speculanas_specularis_GCA_032165255.1.Albumin_Anas.consensus
1	FALSE	AnsAna_Anser_albifrons_DBG-30.COL1a1_Cyg-Gall.consensus	521.721	55.83	55.83	131		0	521	Deamidation (NQ); Proline Oxidation	106586	>AnsAna_Anser_albifrons_DBG-30.COL1a1_Cyg-Gall.consensus
34	TRUE	AnsAna_Spatula_querquedula_GCA_032191525.1.Albumin_Anas.consensus	71.3067	1.3	1.3	1	219000	1	1		69873.1	>AnsAna_Spatula_querquedula_GCA_032191525.1.Albumin_Anas.consensus
2	FALSE	AnsAna_Bucephala_islandica_D1907003562.COL1a2_Anas.consensus	566.436	56.68	56.68	198		0	571	Deamidation (NQ); Dehydration; Proline Oxidation; Proline oxidation to pyroglutamic acid	126271	>AnsAna_Bucephala_islandica_D1907003562.COL1a2_Anas.consensus
2	FALSE	AnsAna_Aythya_americana_D2006016050.COL1a2_Anas.consensus	567.739	58.18	58.18	201		0	585	Deamidation (NQ); Dehydration; Glu->Gln substitution; His->Asn substitution; His->Asp substitution; more	128912	>AnsAna_Aythya_americana_D2006016050.COL1a2_Anas.consensus
1	FALSE	AnsAna_Thalassornis_leuconotus_D2102046040.COL1a1_Cyg-Gall.consensus	538.806	65.42	65.42	163	77100000	3	632	Ala->Cys substitution; Ala->Phe substitution; Ala->Ser substitution; Deamidation (NQ); Ile->Met substitution; more	110523	>AnsAna_Thalassornis_leuconotus_D2102046040.COL1a1_Cyg-Gall.consensus
34	TRUE	AnsAna_Aythya_baeri_GCA_026413565.1.Albumin_Anas.consensus	71.3067	1.3	1.3	1	219000	1	1		69762.9	>AnsAna_Aythya_baeri_GCA_026413565.1.Albumin_Anas.consensus
1	FALSE	AnsAna_Spatula_rhynchotis_GCA_034783165.1.COL1a1_Cyg-Gall.consensus	554.114	61.02	61.02	184		0	708	Deamidation (NQ); Proline Oxidation	135405	>AnsAna_Spatula_rhynchotis_GCA_034783165.1.COL1a1_Cyg-Gall.consensus
1	FALSE	AnsAna_Cygnus_olor_GCA_009769485.2.COL1a1_Cyg-Gall.consensus	554.114	60.01	60.01	184		0	708	Deamidation (NQ); Proline Oxidation	137772	>AnsAna_Cygnus_olor_GCA_009769485.2.COL1a1_Cyg-Gall.consensus
34	TRUE	AnsAna_Anas_undulata_B10K-D-IZW-61.Albumin_Anas.consensus	71.3067	1.3	1.3	1	219000	1	1		69759.9	>AnsAna_Anas_undulata_B10K-D-IZW-61.Albumin_Anas.consensus
31	TRUE	sp|P02460|CO2A1_CHICK	216.851	7.1	7.1	8	6730000	1	26	Deamidation (NQ); Proline Oxidation	83227.5	Collagen alpha-1(II) chain (Fragment) OS=Gallus gallus OX=9031 GN=COL2A1 PE=2 SV=2
7	FALSE	AnsAna_Oxyura_jamaicensis_GCA_011077185.1.COL1a2_Anas.consensus	562.588	58.03	58.03	191		0	548	Ala->Cys substitution; Ala->Ser substitution; Deamidation (NQ); Dehydration; Glu->Gln substitution; more	128883	>AnsAna_Oxyura_jamaicensis_GCA_011077185.1.COL1a2_Anas.consensus
34	TRUE	AnsAna_Anas_georgica_GCA_032275265.1.Albumin_Anas.consensus	71.3067	1.3	1.3	1	219000	1	1		69653.8	>AnsAna_Anas_georgica_GCA_032275265.1.Albumin_Anas.consensus
1	FALSE	AnsAna_Tadorna_tadorna_DBGNRM58.COL1a1_Cyg-Gall.consensus	545.76	57.37	57.37	167		0	631	Deamidation (NQ); Proline Oxidation	123007	>AnsAna_Tadorna_tadorna_DBGNRM58.COL1a1_Cyg-Gall.consensus
2	TRUE	AnsAna_Mareca_falcata_D2006016302.COL1a2_Anas.consensus	572.21	62.67	62.67	212		0	646	Ala->Cys substitution; Ala->Ser substitution; Deamidation (NQ); Dehydration; Glu->Gln substitution; more	124048	>AnsAna_Mareca_falcata_D2006016302.COL1a2_Anas.consensus
34	TRUE	AnsAna_Callonetta_leucophrys_D1907004294.Albumin_Anas.consensus	71.3067	1.3	1.3	1	219000	1	1		69880.1	>AnsAna_Callonetta_leucophrys_D1907004294.Albumin_Anas.consensus
1	FALSE	AnsAna_Anser_indicus_GCA_006229135.1.COL1a1_Cyg-Gall.consensus	555.591	63.34	63.34	191	77100000	3	744	Ala->Cys substitution; Ala->Phe substitution; Ala->Ser substitution; Deamidation (NQ); Ile->Met substitution; more	132281	>AnsAna_Anser_indicus_GCA_006229135.1.COL1a1_Cyg-Gall.consensus
1	FALSE	AnsAna_Aythya_baeri_GCA_026413565.1.COL1a1_Cyg-Gall.consensus	556.228	62.08	62.08	193	166000000	4	747	Ala->Cys substitution; Ala->Phe substitution; Ala->Ser substitution; Deamidation (NQ); Ile->Met substitution; more	137758	>AnsAna_Aythya_baeri_GCA_026413565.1.COL1a1_Cyg-Gall.consensus
34	TRUE	AnsAna_Chenonetta_jubata_D2007020407.Albumin_Anas.consensus	71.3067	1.3	1.3	1	219000	1	1		69963.2	>AnsAna_Chenonetta_jubata_D2007020407.Albumin_Anas.consensus
24	TRUE	AnsAna_Melanitta_americana_D2208137246.COL1a1_Cyg-Gall.consensus	507.274	60.53	60.53	114		0	449	Deamidation (NQ); Leu->Trp substitution; Proline Oxidation	83253.4	>AnsAna_Melanitta_americana_D2208137246.COL1a1_Cyg-Gall.consensus
2	FALSE	AnsAna_Netta_rufina_MOB-64.COL1a2_Anas.consensus	557.696	62.88	62.88	183		0	517	Deamidation (NQ); Dehydration; Proline Oxidation; Proline oxidation to pyroglutamic acid	105536	>AnsAna_Netta_rufina_MOB-64.COL1a2_Anas.consensus
34	TRUE	AnsAna_Netta_peposaca_D1907004221.Albumin_Anas.consensus	71.3067	1.3	1.3	1	219000	1	1		69776.9	>AnsAna_Netta_peposaca_D1907004221.Albumin_Anas.consensus
34	TRUE	AnsAna_Mareca_penelope_GCA_036026335.1.Albumin_Anas.consensus	71.3067	1.3	1.3	1	219000	1	1		69718.9	>AnsAna_Mareca_penelope_GCA_036026335.1.Albumin_Anas.consensus
34	TRUE	AnsAna_Amazonetta_brasiliensis_D2007020470.Albumin_Anas.consensus	71.3067	1.3	1.3	1	219000	1	1		69837	>AnsAna_Amazonetta_brasiliensis_D2007020470.Albumin_Anas.consensus
34	TRUE	AnsAna_Mareca_strepera_DBGNRM54.Albumin_Anas.consensus	71.3067	1.3	1.3	1	219000	1	1		69664.9	>AnsAna_Mareca_strepera_DBGNRM54.Albumin_Anas.consensus
2	FALSE	AnsAna_Histrionicus_histrionicus_D1907004311.COL1a2_Anas.consensus	566.436	56.68	56.68	198		0	572	Deamidation (NQ); Dehydration; Proline Oxidation; Proline oxidation to pyroglutamic acid	126213	>AnsAna_Histrionicus_histrionicus_D1907004311.COL1a2_Anas.consensus
7	FALSE	AnsAna_Dendrocygna_javanica_B10K-D-IZW-86.COL1a2_Anas.consensus	564.365	56.77	56.77	193		0	554	Deamidation (NQ); Dehydration; Proline Oxidation; Proline oxidation to pyroglutamic acid	126069	>AnsAna_Dendrocygna_javanica_B10K-D-IZW-86.COL1a2_Anas.consensus
34	TRUE	AnsAna_Aythya_ferina_D1907000514.Albumin_Anas.consensus	71.3067	1.3	1.3	1	219000	1	1		69762.9	>AnsAna_Aythya_ferina_D1907000514.Albumin_Anas.consensus
18	TRUE	AnsAna_Anser_brachyrhynchus_GCA_002592135.1.COL1a2_Anas.consensus	548.884	56.2	56.2	177		0	479	Ala->Cys substitution; Ala->Ser substitution; Deamidation (NQ); Dehydration; His->Asp substitution; more	128976	>AnsAna_Anser_brachyrhynchus_GCA_002592135.1.COL1a2_Anas.consensus
33	FALSE	sp|Q9DE68|PGS2_COTJA	117.115	7.02	7.02	2	34500	2	3	Deamidation (NQ)	39571.7	Decorin OS=Coturnix japonica OX=93934 GN=DCN PE=2 SV=1
34	TRUE	AnsAna_Nomonyx_dominicus_D1907003520.Albumin_Anas.consensus	71.3067	1.3	1.3	1	219000	1	1		69900.1	>AnsAna_Nomonyx_dominicus_D1907003520.Albumin_Anas.consensus
36	TRUE	sp|P13944|COCA1_CHICK	47.0413	0.35	0.35	1	37800	1	2		340582	Collagen alpha-1(XII) chain OS=Gallus gallus OX=9031 GN=COL12A1 PE=1 SV=3
15	TRUE	AnsAna_Tachyeres_leucocephalus_GCA_034780855.1.COL1a1_Cyg-Gall.consensus	539.021	58.12	58.12	161	270000	2	582	Deamidation (NQ); Proline Oxidation	123644	>AnsAna_Tachyeres_leucocephalus_GCA_034780855.1.COL1a1_Cyg-Gall.consensus
2	FALSE	AnsAna_Callonetta_leucophrys_D1907004294.COL1a2_Anas.consensus	566.436	56.73	56.73	198		0	572	Deamidation (NQ); Dehydration; Proline Oxidation; Proline oxidation to pyroglutamic acid	126158	>AnsAna_Callonetta_leucophrys_D1907004294.COL1a2_Anas.consensus
7	FALSE	AnsAna_Stictonetta_naevosa_D2006016299.COL1a2_Anas.consensus	565.485	59.25	59.25	195		0	557	Deamidation (NQ); Dehydration; Proline Oxidation; Proline oxidation to pyroglutamic acid	125281	>AnsAna_Stictonetta_naevosa_D2006016299.COL1a2_Anas.consensus
13	TRUE	AnsAna_Amazonetta_brasiliensis_D2007020470.COL1a2_Anas.consensus	567.984	59.52	59.52	202		1	577	Deamidation (NQ); Dehydration; Proline Oxidation; Proline oxidation to pyroglutamic acid	126281	>AnsAna_Amazonetta_brasiliensis_D2007020470.COL1a2_Anas.consensus
32	FALSE	sp|P32918|APOA1_COTJA	169.531	10.98	10.98	3	591000	3	8	Deamidation (NQ)	30753.2	Apolipoprotein A-I OS=Coturnix japonica OX=93934 GN=APOA1 PE=1 SV=2
7	FALSE	AnsAna_Dendrocygna_viduata_CL100160616_L02.COL1a2_Anas.consensus	564.365	56.77	56.77	193		0	553	Deamidation (NQ); Dehydration; Proline Oxidation; Proline oxidation to pyroglutamic acid	126055	>AnsAna_Dendrocygna_viduata_CL100160616_L02.COL1a2_Anas.consensus
34	TRUE	AnsAna_Aythya_nyroca_MOB-23.Albumin_Anas.consensus	71.3067	1.3	1.3	1	219000	1	1		69762.9	>AnsAna_Aythya_nyroca_MOB-23.Albumin_Anas.consensus
2	FALSE	AnsAna_Mergellus_albellus_B10K-D-WWT-19.COL1a2_Anas.consensus	566.644	57.06	57.06	199		0	582	Deamidation (NQ); Dehydration; Glu->Gln substitution; His->Asn substitution; His->Asp substitution; more	126271	>AnsAna_Mergellus_albellus_B10K-D-WWT-19.COL1a2_Anas.consensus
2	FALSE	AnsAna_Chloephaga_melanoptera_B10K-D-IZW-12.COL1a2_Anas.consensus	566.436	56.68	56.68	198		0	572	Deamidation (NQ); Dehydration; Proline Oxidation; Proline oxidation to pyroglutamic acid	126253	>AnsAna_Chloephaga_melanoptera_B10K-D-IZW-12.COL1a2_Anas.consensus
34	TRUE	AnsAna_Mergus_serrator_D2006016306.Albumin_Anas.consensus	71.3067	1.3	1.3	1	219000	1	1		69846	>AnsAna_Mergus_serrator_D2006016306.Albumin_Anas.consensus
2	FALSE	AnsAna_Anas_undulata_B10K-D-IZW-61.COL1a2_Anas.consensus	567.775	59.45	59.45	201		0	576	Deamidation (NQ); Dehydration; Proline Oxidation; Proline oxidation to pyroglutamic acid	126281	>AnsAna_Anas_undulata_B10K-D-IZW-61.COL1a2_Anas.consensus
8	TRUE	AnsAna_Melanitta_fusca_GCA_029620185.1.COL1a1_Cyg-Gall.consensus	542.992	63.01	63.01	162		0	633	Deamidation (NQ); Leu->Trp substitution; Proline Oxidation	113960	>AnsAna_Melanitta_fusca_GCA_029620185.1.COL1a1_Cyg-Gall.consensus
34	TRUE	AnsAna_Bucephala_clangula_DBGNRM73.Albumin_Anas.consensus	71.3067	1.3	1.3	1	219000	1	1		69832	>AnsAna_Bucephala_clangula_DBGNRM73.Albumin_Anas.consensus
34	TRUE	AnsAna_Aythya_americana_D2006016050.Albumin_Anas.consensus	71.3067	1.3	1.3	1	219000	1	1		69762.9	>AnsAna_Aythya_americana_D2006016050.Albumin_Anas.consensus
34	TRUE	AnsAna_Mergus_merganser_D1907004324.Albumin_Anas.consensus	71.3067	1.3	1.3	1	219000	1	1		69846	>AnsAna_Mergus_merganser_D1907004324.Albumin_Anas.consensus
34	TRUE	AnsAna_Chloephaga_picta_B10K-D-IZW-10.Albumin_Anas.consensus	71.3067	1.3	1.3	1	219000	1	1		69773.1	>AnsAna_Chloephaga_picta_B10K-D-IZW-10.Albumin_Anas.consensus
34	TRUE	AnsAna_Lophonetta_specularioides_GCA_032165235.1.Albumin_Anas.consensus	71.3067	1.3	1.3	1	219000	1	1		69837	>AnsAna_Lophonetta_specularioides_GCA_032165235.1.Albumin_Anas.consensus
37	TRUE	sp|Q9DE67|LUM_COTJA	91.9658	2.92	2.92	1	181000	1	2		38642.4	Lumican OS=Coturnix japonica OX=93934 GN=LUM PE=2 SV=1
2	FALSE	AnsAna_Mareca_sibilatrix_GCA_034783215.1.COL1a2_Anas.consensus	571.123	59.5	59.5	207		0	608	Deamidation (NQ); Dehydration; Gly->Ala substitution; Proline Oxidation; Proline oxidation to pyroglutamic acid	128871	>AnsAna_Mareca_sibilatrix_GCA_034783215.1.COL1a2_Anas.consensus
1	FALSE	AnsAna_Oxyura_jamaicensis_GCA_011077185.1.COL1a1_Cyg-Gall.consensus	548.819	58.28	58.28	173		0	654	Deamidation (NQ); Proline Oxidation	129001	>AnsAna_Oxyura_jamaicensis_GCA_011077185.1.COL1a1_Cyg-Gall.consensus
2	FALSE	AnsAna_Chloephaga_melanoptera_B10K-D-WWT-5.COL1a2_Anas.consensus	566.436	56.68	56.68	198		0	572	Deamidation (NQ); Dehydration; Proline Oxidation; Proline oxidation to pyroglutamic acid	126271	>AnsAna_Chloephaga_melanoptera_B10K-D-WWT-5.COL1a2_Anas.consensus
34	TRUE	AnsAna_Anser_rossii_D1907004357.Albumin_Anas.consensus	71.3067	1.3	1.3	1	219000	1	1		69894.1	>AnsAna_Anser_rossii_D1907004357.Albumin_Anas.consensus
4	TRUE	AnsAna_Aix_sponsa_B10K-D-WWT-1.COL1a1_Cyg-Gall.consensus	547.408	65.85	65.85	171	516000	2	647	Deamidation (NQ); Proline Oxidation	118085	>AnsAna_Aix_sponsa_B10K-D-WWT-1.COL1a1_Cyg-Gall.consensus
2	FALSE	AnsAna_Neochen_jubata_B10K-D-WWT-20.COL1a2_Anas.consensus	566.436	56.68	56.68	198		0	572	Deamidation (NQ); Dehydration; Proline Oxidation; Proline oxidation to pyroglutamic acid	126271	>AnsAna_Neochen_jubata_B10K-D-WWT-20.COL1a2_Anas.consensus
34	TRUE	AnsAna_Anas_bahamensis_D2007020419.Albumin_Anas.consensus	71.3067	1.3	1.3	1	219000	1	1		69711.9	>AnsAna_Anas_bahamensis_D2007020419.Albumin_Anas.consensus
34	TRUE	AnsAna_Mareca_americana_GCA_035588595.1.Albumin_Anas.consensus	71.3067	1.3	1.3	1	219000	1	1		69718.9	>AnsAna_Mareca_americana_GCA_035588595.1.Albumin_Anas.consensus
34	TRUE	AnsAna_Cygnus_atratus_GCA_013377495.2.Albumin_Anas.consensus	71.3067	1.3	1.3	1	219000	1	1		69956.2	>AnsAna_Cygnus_atratus_GCA_013377495.2.Albumin_Anas.consensus
34	TRUE	AnsAna_Dendrocygna_viduata_CL100160616_L02.Albumin_Anas.consensus	71.3067	1.3	1.3	1	219000	1	1		69941.1	>AnsAna_Dendrocygna_viduata_CL100160616_L02.Albumin_Anas.consensus
24	FALSE	AnsAna_Anser_erythropus_DBGNRM61.COL1a1_Cyg-Gall.consensus	427.177	41.65	41.65	51		0	242	Deamidation (NQ); Leu->Trp substitution; Proline Oxidation	49493.7	>AnsAna_Anser_erythropus_DBGNRM61.COL1a1_Cyg-Gall.consensus
14	TRUE	sp|P02457|CO1A1_CHICK	533.237	46.25	46.25	151	115000	2	614	Deamidation (NQ); Proline Oxidation	137735	Collagen alpha-1(I) chain OS=Gallus gallus OX=9031 GN=COL1A1 PE=1 SV=3
34	TRUE	AnsAna_Chloephaga_rubidiceps_D2104051194.Albumin_Anas.consensus	71.3067	1.3	1.3	1	219000	1	1		69829.1	>AnsAna_Chloephaga_rubidiceps_D2104051194.Albumin_Anas.consensus
2	FALSE	AnsAna_Lophonetta_specularioides_GCA_032165235.1.COL1a2_Anas.consensus	568.63	59.5	59.5	205		0	609	Ala->Cys substitution; Ala->Ser substitution; Deamidation (NQ); Dehydration; Glu->Gln substitution; more	128882	>AnsAna_Lophonetta_specularioides_GCA_032165235.1.COL1a2_Anas.consensus
1	TRUE	AnsAna_Branta_hutchinsii_GCA_032270845.1.COL1a1_Cyg-Gall.consensus	556.228	62.08	62.08	193	166000000	4	750	Ala->Cys substitution; Ala->Phe substitution; Ala->Ser substitution; Deamidation (NQ); Ile->Met substitution; more	137772	>AnsAna_Branta_hutchinsii_GCA_032270845.1.COL1a1_Cyg-Gall.consensus
2	FALSE	AnsAna_Somateria_spectabilis_D2006016067.COL1a2_Anas.consensus	566.436	56.68	56.68	198		0	570	Deamidation (NQ); Dehydration; Proline Oxidation; Proline oxidation to pyroglutamic acid	126271	>AnsAna_Somateria_spectabilis_D2006016067.COL1a2_Anas.consensus
7	FALSE	AnsAna_Dendrocygna_guttata_B10K-D-IZW-85.COL1a2_Anas.consensus	565.011	58.2	58.2	196		0	587	Ala->Cys substitution; Ala->Ser substitution; Deamidation (NQ); Dehydration; Glu->Gln substitution; more	125298	>AnsAna_Dendrocygna_guttata_B10K-D-IZW-85.COL1a2_Anas.consensus
34	TRUE	AnsAna_Cairina_moschata_GCA_018104995.1.Albumin_Anas.consensus	71.3067	1.3	1.3	1	219000	1	1		69775.9	>AnsAna_Cairina_moschata_GCA_018104995.1.Albumin_Anas.consensus
27	TRUE	AnsAna_Netta_rufina_MOB-64.COL1a1_Cyg-Gall.consensus	492.895	55.24	55.24	101	113000	1	423	Deamidation (NQ); Proline Oxidation	88184.1	>AnsAna_Netta_rufina_MOB-64.COL1a1_Cyg-Gall.consensus
2	FALSE	AnsAna_Tadorna_cana_B10K-D-IZW-124.COL1a2_Anas.consensus	566.436	56.68	56.68	198		0	572	Deamidation (NQ); Dehydration; Proline Oxidation; Proline oxidation to pyroglutamic acid	126271	>AnsAna_Tadorna_cana_B10K-D-IZW-124.COL1a2_Anas.consensus
34	TRUE	AnsAna_Dendrocygna_bicolor_B10K-D-IZW-84.Albumin_Anas.consensus	71.3067	1.3	1.3	1	219000	1	1		69911.1	>AnsAna_Dendrocygna_bicolor_B10K-D-IZW-84.Albumin_Anas.consensus
34	TRUE	AnsAna_Aythya_collaris_D1907001858.Albumin_Anas.consensus	71.3067	1.3	1.3	1	219000	1	1		69732.9	>AnsAna_Aythya_collaris_D1907001858.Albumin_Anas.consensus
1	FALSE	AnsAna_Aythya_nyroca_MOB-23.COL1a1_Cyg-Gall.consensus	502.734	61.19	61.19	114		0	485	Ala->Ser substitution; Deamidation (NQ); Leu->Phe substitution; Proline Oxidation; Ser->Asp substitution; more	78152	>AnsAna_Aythya_nyroca_MOB-23.COL1a1_Cyg-Gall.consensus
19	TRUE	AnsAna_Anser_albifrons_DBG-30.COL1a2_Anas.consensus	550.984	57.14	57.14	178		0	485	Deamidation (NQ); Dehydration; Proline Oxidation; Val->Gln substitution	125328	>AnsAna_Anser_albifrons_DBG-30.COL1a2_Anas.consensus
9	TRUE	AnsAna_Cygnus_melancoryphus_CL100153795_L02.COL1a1_Cyg-Gall.consensus	541.755	64.74	64.74	162	1330000	1	619	Deamidation (NQ); Proline Oxidation	104454	>AnsAna_Cygnus_melancoryphus_CL100153795_L02.COL1a1_Cyg-Gall.consensus
1	FALSE	AnsAna_Branta_bernicla_D2007020471.COL1a1_Cyg-Gall.consensus	441.769	48.64	48.64	61		0	281	Deamidation (NQ); Leu->Phe substitution; Proline Oxidation; Ser->Asp substitution; Ser->Met substitution	52390	>AnsAna_Branta_bernicla_D2007020471.COL1a1_Cyg-Gall.consensus
2	FALSE	AnsAna_Anas_fulvigula_D2005012408.COL1a2_Anas.consensus	562.114	63.68	63.68	190		0	554	Deamidation (NQ); Dehydration; Proline Oxidation; Proline oxidation to pyroglutamic acid	108415	>AnsAna_Anas_fulvigula_D2005012408.COL1a2_Anas.consensus
34	TRUE	AnsAna_Nettapus_auritus_GCA_011076525.1.Albumin_Anas.consensus	71.3067	1.3	1.3	1	219000	1	1		69916.1	>AnsAna_Nettapus_auritus_GCA_011076525.1.Albumin_Anas.consensus
34	TRUE	AnsAna_Branta_hutchinsii_B10K-D-MSB-25.Albumin_Anas.consensus	71.3067	1.3	1.3	1	219000	1	1		69910.1	>AnsAna_Branta_hutchinsii_B10K-D-MSB-25.Albumin_Anas.consensus
2	FALSE	AnsAna_Tachyeres_pteneres_D2102046038.COL1a2_Anas.consensus	567.775	59.45	59.45	201		0	574	Deamidation (NQ); Dehydration; Proline Oxidation; Proline oxidation to pyroglutamic acid	126281	>AnsAna_Tachyeres_pteneres_D2102046038.COL1a2_Anas.consensus
18	FALSE	AnsAna_Anser_erythropus_DBGNRM61.COL1a2_Anas.consensus	547.579	56.47	56.47	172		0	449	Deamidation (NQ); Dehydration; Proline Oxidation; Val->Gln substitution	125386	>AnsAna_Anser_erythropus_DBGNRM61.COL1a2_Anas.consensus
34	TRUE	AnsAna_Anser_fabalis_DBGNRM71.Albumin_Anas.consensus	71.3067	1.3	1.3	1	219000	1	1		69876.1	>AnsAna_Anser_fabalis_DBGNRM71.Albumin_Anas.consensus
2	FALSE	AnsAna_Mareca_strepera_GCA_035583915.1.COL1a2_Anas.consensus	571.123	59.5	59.5	207		0	600	Deamidation (NQ); Dehydration; Gly->Ala substitution; Proline Oxidation; Proline oxidation to pyroglutamic acid	128871	>AnsAna_Mareca_strepera_GCA_035583915.1.COL1a2_Anas.consensus
20	FALSE	AnsAna_Chloephaga_rubidiceps_D2104051194.COL1a2_Anas.consensus	550.72	55.61	55.61	177		0	490	Deamidation (NQ); Dehydration; Proline Oxidation; Val->Gln substitution	128858	>AnsAna_Chloephaga_rubidiceps_D2104051194.COL1a2_Anas.consensus
1	FALSE	AnsAna_Anas_capensis_GCA_032357685.1.COL1a1_Cyg-Gall.consensus	485.411	51.51	51.51	102		0	367	Deamidation (NQ); Proline Oxidation	96943.5	>AnsAna_Anas_capensis_GCA_032357685.1.COL1a1_Cyg-Gall.consensus
34	TRUE	AnsAna_Dendrocygna_javanica_B10K-D-IZW-86.Albumin_Anas.consensus	71.3067	1.3	1.3	1	219000	1	1		69892	>AnsAna_Dendrocygna_javanica_B10K-D-IZW-86.Albumin_Anas.consensus
1	FALSE	AnsAna_Clangula_hyemalis_GCA_029619115.1.COL1a1_Cyg-Gall.consensus	281.473	21.99	21.99	12		0	47	Deamidation (NQ); Proline Oxidation	36412.6	>AnsAna_Clangula_hyemalis_GCA_029619115.1.COL1a1_Cyg-Gall.consensus
34	TRUE	AnsAna_Mareca_falcata_D2006016302.Albumin_Anas.consensus	71.3067	1.3	1.3	1	219000	1	1		69693.9	>AnsAna_Mareca_falcata_D2006016302.Albumin_Anas.consensus
38	TRUE	sp|O93390|SPRC_COTJA	85.2079	4.36	4.36	1	199000	1	1		34051.6	SPARC OS=Coturnix japonica OX=93934 GN=SPARC PE=2 SV=1
20	FALSE	AnsAna_Chloephaga_poliocephala_B10K-D-IZW-11.COL1a2_Anas.consensus	550.72	55.61	55.61	177		0	487	Deamidation (NQ); Dehydration; Proline Oxidation	128858	>AnsAna_Chloephaga_poliocephala_B10K-D-IZW-11.COL1a2_Anas.consensus
7	FALSE	AnsAna_Nomonyx_dominicus_D1907003520.COL1a2_Anas.consensus	494.311	51.48	51.48	106		0	282	Deamidation (NQ); Proline Oxidation	102992	>AnsAna_Nomonyx_dominicus_D1907003520.COL1a2_Anas.consensus
1	FALSE	AnsAna_Anser_indicus_GCA_025583725.1.COL1a1_Cyg-Gall.consensus	554.218	59.39	59.39	185	77100000	3	713	Deamidation (NQ); Lys->Glu substitution; Proline Oxidation; Val->Pro substitution	137789	>AnsAna_Anser_indicus_GCA_025583725.1.COL1a1_Cyg-Gall.consensus
1	FALSE	AnsAna_Aythya_collaris_D1907001858.COL1a1_Cyg-Gall.consensus	489.813	73.54	73.54	96		0	412	Deamidation (NQ); Proline Oxidation	58792.2	>AnsAna_Aythya_collaris_D1907001858.COL1a1_Cyg-Gall.consensus
34	TRUE	AnsAna_Heteronetta_atricapilla_GCA_011075105.1.Albumin_Anas.consensus	71.3067	1.3	1.3	1	219000	1	1		69857.1	>AnsAna_Heteronetta_atricapilla_GCA_011075105.1.Albumin_Anas.consensus
2	FALSE	AnsAna_Clangula_hyemalis_B10K-D-DBG-162.COL1a2_Anas.consensus	565.827	70.39	70.39	199		0	594	Ala->Cys substitution; Ala->Ser substitution; Deamidation (NQ); Dehydration; Glu->Gln substitution; more	95808	>AnsAna_Clangula_hyemalis_B10K-D-DBG-162.COL1a2_Anas.consensus
1	FALSE	AnsAna_Mareca_strepera_GCA_035583915.1.COL1a1_Cyg-Gall.consensus	554.114	60.01	60.01	184		0	708	Deamidation (NQ); Proline Oxidation	137758	>AnsAna_Mareca_strepera_GCA_035583915.1.COL1a1_Cyg-Gall.consensus
12	FALSE	AnsAna_Anas_bahamensis_D2007020419.COL1a2_Anas.consensus	568.243	60.34	60.34	202	75400	1	581	Deamidation (NQ); Dehydration; Proline Oxidation; Proline oxidation to pyroglutamic acid; Ser->Thr substitution	126312	>AnsAna_Anas_bahamensis_D2007020419.COL1a2_Anas.consensus
2	FALSE	AnsAna_Tadorna_tadorna_B10K-D-WWT-25.COL1a2_Anas.consensus	566.436	56.68	56.68	198		0	572	Deamidation (NQ); Dehydration; Proline Oxidation; Proline oxidation to pyroglutamic acid	126271	>AnsAna_Tadorna_tadorna_B10K-D-WWT-25.COL1a2_Anas.consensus
1	FALSE	AnsAna_Cygnus_cygnus_GCA_014362685.1.COL1a1_Cygnus.BMBB01006201.1	495.184	66.08	66.08	103		0	319	Deamidation (NQ); Proline Oxidation	77338.2	Cygnus cygnus DNA, Cycy_6201, whole genome shotgun sequence:[revcomp], 9808 - 86, length 2709, score 4407:[translate(1)]
2	FALSE	AnsAna_Aythya_fuligula_GCA_009819795.1.COL1a2_Anas.consensus	567.532	57.81	57.81	200		0	575	Deamidation (NQ); Dehydration; Proline Oxidation; Proline oxidation to pyroglutamic acid	128912	>AnsAna_Aythya_fuligula_GCA_009819795.1.COL1a2_Anas.consensus
2	FALSE	AnsAna_Mareca_americana_GCA_035588595.1.COL1a2_Anas.consensus	571.123	59.5	59.5	207		0	609	Deamidation (NQ); Dehydration; Gly->Ala substitution; Proline Oxidation; Proline oxidation to pyroglutamic acid	128871	>AnsAna_Mareca_americana_GCA_035588595.1.COL1a2_Anas.consensus
2	FALSE	AnsAna_Tachyeres_leucocephalus_GCA_034780855.1.COL1a2_Anas.consensus	567.775	58.4	58.4	201		0	574	Deamidation (NQ); Dehydration; Proline Oxidation; Proline oxidation to pyroglutamic acid	128882	>AnsAna_Tachyeres_leucocephalus_GCA_034780855.1.COL1a2_Anas.consensus
2	FALSE	AnsAna_Anas_superciliosa_D2006016005.COL1a2_Anas.consensus	567.775	58.4	58.4	201		0	576	Deamidation (NQ); Dehydration; Proline Oxidation; Proline oxidation to pyroglutamic acid	128882	>AnsAna_Anas_superciliosa_D2006016005.COL1a2_Anas.consensus
1	FALSE	AnsAna_Neochen_jubata_B10K-D-WWT-20.COL1a1_Cyg-Gall.consensus	553.854	61.19	61.19	183		0	707	Deamidation (NQ); Proline Oxidation	134652	>AnsAna_Neochen_jubata_B10K-D-WWT-20.COL1a1_Cyg-Gall.consensus
7	FALSE	AnsAna_Coscoroba_coscoroba_D2102046636.COL1a2_Anas.consensus	564.365	57.07	57.07	193		0	554	Deamidation (NQ); Dehydration; Proline Oxidation; Proline oxidation to pyroglutamic acid	125330	>AnsAna_Coscoroba_coscoroba_D2102046636.COL1a2_Anas.consensus
34	TRUE	AnsAna_Thalassornis_leuconotus_D2102046040.Albumin_Anas.consensus	71.3067	1.3	1.3	1	219000	1	1		69833.9	>AnsAna_Thalassornis_leuconotus_D2102046040.Albumin_Anas.consensus
34	TRUE	AnsAna_Anser_brachyrhynchus_GCA_002592135.1.Albumin_Anas.consensus	71.3067	1.3	1.3	1	219000	1	1		69876.1	>AnsAna_Anser_brachyrhynchus_GCA_002592135.1.Albumin_Anas.consensus
25	TRUE	AnsAna_Cygnus_cygnus_DBG88.COL1a2_Anas.consensus	542.686	54.74	54.74	163	903000	1	421	Deamidation (NQ); Dehydration; Proline Oxidation; Val->Gln substitution	125300	>AnsAna_Cygnus_cygnus_DBG88.COL1a2_Anas.consensus
34	TRUE	AnsAna_Clangula_hyemalis_GCA_029619115.1.Albumin_Anas.consensus	71.3067	1.3	1.3	1	219000	1	1		69863	>AnsAna_Clangula_hyemalis_GCA_029619115.1.Albumin_Anas.consensus
1	FALSE	AnsAna_Dendrocygna_bicolor_B10K-D-IZW-84.COL1a1_Cyg-Gall.consensus	545.592	57.6	57.6	171		0	669	Ala->Cys substitution; Ala->Phe substitution; Ala->Ser substitution; Deamidation (NQ); Ile->Met substitution; more	135642	>AnsAna_Dendrocygna_bicolor_B10K-D-IZW-84.COL1a1_Cyg-Gall.consensus
20	FALSE	AnsAna_Chloephaga_hybrida_D2104051195.COL1a2_Anas.consensus	550.72	55.61	55.61	177		0	490	Deamidation (NQ); Dehydration; Proline Oxidation; Val->Gln substitution	128858	>AnsAna_Chloephaga_hybrida_D2104051195.COL1a2_Anas.consensus
1	FALSE	AnsAna_Bucephala_clangula_DBGNRM73.COL1a1_Cyg-Gall.consensus	484.587	56.87	56.87	90		0	388	Deamidation (NQ); Proline Oxidation	76725.4	>AnsAna_Bucephala_clangula_DBGNRM73.COL1a1_Cyg-Gall.consensus
34	TRUE	AnsAna_Anas_capensis_GCA_032357685.1.Albumin_Anas.consensus	71.3067	1.3	1.3	1	219000	1	1		69722.9	>AnsAna_Anas_capensis_GCA_032357685.1.Albumin_Anas.consensus
34	TRUE	AnsAna_Stictonetta_naevosa_GCA_011074415.1.Albumin_Anas.consensus	71.3067	1.3	1.3	1	219000	1	1		70001.2	>AnsAna_Stictonetta_naevosa_GCA_011074415.1.Albumin_Anas.consensus
1	FALSE	AnsAna_Anas_luzonica_B10K-D-IZW-59.COL1a1_Cyg-Gall.consensus	528.454	63.25	63.25	142		0	548	Deamidation (NQ); Proline Oxidation	93041.2	>AnsAna_Anas_luzonica_B10K-D-IZW-59.COL1a1_Cyg-Gall.consensus
1	FALSE	AnsAna_Mergellus_albellus_B10K-D-WWT-19.COL1a1_Cyg-Gall.consensus	493.886	62.82	62.82	102		0	346	Deamidation (NQ); Proline Oxidation	72993	>AnsAna_Mergellus_albellus_B10K-D-WWT-19.COL1a1_Cyg-Gall.consensus
2	FALSE	AnsAna_Netta_peposaca_D1907004221.COL1a2_Anas.consensus	567.739	59.22	59.22	201		0	577	Deamidation (NQ); Dehydration; Proline Oxidation; Proline oxidation to pyroglutamic acid	126311	>AnsAna_Netta_peposaca_D1907004221.COL1a2_Anas.consensus
34	TRUE	AnsAna_Spatula_rhynchotis_GCA_034783165.1.Albumin_Anas.consensus	71.3067	1.3	1.3	1	219000	1	1		69873.1	>AnsAna_Spatula_rhynchotis_GCA_034783165.1.Albumin_Anas.consensus
1	FALSE	AnsAna_Cygnus_columbianus_DBG-71.COL1a1_Cyg-Gall.consensus	530.421	55.94	55.94	145		0	556	Deamidation (NQ); Proline Oxidation	109161	>AnsAna_Cygnus_columbianus_DBG-71.COL1a1_Cyg-Gall.consensus
34	TRUE	AnsAna_Anas_acuta_GCA_036026395.1.Albumin_Anas.consensus	71.3067	1.3	1.3	1	219000	1	1		69653.8	>AnsAna_Anas_acuta_GCA_036026395.1.Albumin_Anas.consensus
2	FALSE	AnsAna_Tachyeres_brachypterus_GCA_032357605.1.COL1a2_Anas.consensus	567.775	58.4	58.4	201		0	575	Deamidation (NQ); Dehydration; Proline Oxidation; Proline oxidation to pyroglutamic acid	128882	>AnsAna_Tachyeres_brachypterus_GCA_032357605.1.COL1a2_Anas.consensus
34	TRUE	AnsAna_Cygnus_columbianus_DBG-71.Albumin_Anas.consensus	71.3067	1.3	1.3	1	219000	1	1		69959.1	>AnsAna_Cygnus_columbianus_DBG-71.Albumin_Anas.consensus
34	TRUE	AnsAna_Tachyeres_pteneres_D2102046038.Albumin_Anas.consensus	71.3067	1.3	1.3	1	219000	1	1		69851.1	>AnsAna_Tachyeres_pteneres_D2102046038.Albumin_Anas.consensus
2	FALSE	AnsAna_Mareca_strepera_DBGNRM54.COL1a2_Anas.consensus	571.123	60.57	60.57	207		0	609	Deamidation (NQ); Dehydration; Gly->Ala substitution; Proline Oxidation; Proline oxidation to pyroglutamic acid	126270	>AnsAna_Mareca_strepera_DBGNRM54.COL1a2_Anas.consensus
1	TRUE	AnsAna_Anser_cygnoides_GCA_025388735.1.COL1a1_Cyg-Gall.consensus	556.228	62.08	62.08	193	166000000	4	750	Ala->Cys substitution; Ala->Phe substitution; Ala->Ser substitution; Deamidation (NQ); Ile->Met substitution; more	137772	>AnsAna_Anser_cygnoides_GCA_025388735.1.COL1a1_Cyg-Gall.consensus
23	FALSE	AnsAna_Cygnus_atratus_GCA_013377495.2.COL1a2_Anas.consensus	544.167	54.22	54.22	165		0	421	Deamidation (NQ); Proline Oxidation; Val->Gln substitution	128932	>AnsAna_Cygnus_atratus_GCA_013377495.2.COL1a2_Anas.consensus
34	TRUE	AnsAna_Anser_cygnoides_GCA_026259575.1.Albumin_Anas.consensus	71.3067	1.3	1.3	1	219000	1	1		69910.1	>AnsAna_Anser_cygnoides_GCA_026259575.1.Albumin_Anas.consensus
34	TRUE	AnsAna_Tachyeres_leucocephalus_GCA_034780855.1.Albumin_Anas.consensus	71.3067	1.3	1.3	1	219000	1	1		69851.1	>AnsAna_Tachyeres_leucocephalus_GCA_034780855.1.Albumin_Anas.consensus
34	TRUE	AnsAna_Aythya_fuligula_GCA_009819795.1.Albumin_Anas.consensus	71.3067	1.3	1.3	1	219000	1	1		69762.9	>AnsAna_Aythya_fuligula_GCA_009819795.1.Albumin_Anas.consensus
2	FALSE	AnsAna_Mergus_serrator_D2006016306.COL1a2_Anas.consensus	566.436	56.68	56.68	198		0	570	Deamidation (NQ); Dehydration; Proline Oxidation; Proline oxidation to pyroglutamic acid	126271	>AnsAna_Mergus_serrator_D2006016306.COL1a2_Anas.consensus
34	TRUE	AnsAna_Plectropterus_gambensis_B10K-D-WWT-22.Albumin_Anas.consensus	71.3067	1.3	1.3	1	219000	1	1		69881.1	>AnsAna_Plectropterus_gambensis_B10K-D-WWT-22.Albumin_Anas.consensus
34	TRUE	AnsAna_Mergellus_albellus_B10K-D-WWT-19.Albumin_Anas.consensus	71.3067	1.3	1.3	1	219000	1	1		69846	>AnsAna_Mergellus_albellus_B10K-D-WWT-19.Albumin_Anas.consensus
19	FALSE	AnsAna_Anser_fabalis_DBGNRM71.COL1a2_Anas.consensus	540.086	61.27	61.27	162		0	441	Deamidation (NQ); Dehydration; Proline Oxidation	105526	>AnsAna_Anser_fabalis_DBGNRM71.COL1a2_Anas.consensus
2	FALSE	AnsAna_Aythya_baeri_GCA_026413565.1.COL1a2_Anas.consensus	567.532	57.81	57.81	200		0	575	Deamidation (NQ); Dehydration; Proline Oxidation; Proline oxidation to pyroglutamic acid	128912	>AnsAna_Aythya_baeri_GCA_026413565.1.COL1a2_Anas.consensus
1	FALSE	AnsAna_Cereopsis_novaehollandiae_B10K-D-IZW-75.COL1a1_Cyg-Gall.consensus	551.429	68.21	68.21	181	77100000	3	703	Ala->Cys substitution; Ala->Phe substitution; Ala->Ser substitution; Deamidation (NQ); Ile->Met substitution; more	107269	>AnsAna_Cereopsis_novaehollandiae_B10K-D-IZW-75.COL1a1_Cyg-Gall.consensus
34	TRUE	AnsAna_Anser_albifrons_DBG-30.Albumin_Anas.consensus	71.3067	1.3	1.3	1	219000	1	1		69876.1	>AnsAna_Anser_albifrons_DBG-30.Albumin_Anas.consensus
34	TRUE	AnsAna_Anser_anser_DBG-36.Albumin_Anas.consensus	71.3067	1.3	1.3	1	219000	1	1		69910.1	>AnsAna_Anser_anser_DBG-36.Albumin_Anas.consensus
1	TRUE	AnsAna_Cygnus_atratus_GCA_013377495.2.COL1a1_Cyg-Gall.consensus	556.228	62.08	62.08	193	166000000	4	750	Ala->Cys substitution; Ala->Phe substitution; Ala->Ser substitution; Deamidation (NQ); Ile->Met substitution; more	137772	>AnsAna_Cygnus_atratus_GCA_013377495.2.COL1a1_Cyg-Gall.consensus
34	TRUE	AnsAna_Polysticta_stelleri_D2301166173.Albumin_Anas.consensus	71.3067	1.3	1.3	1	219000	1	1		69832	>AnsAna_Polysticta_stelleri_D2301166173.Albumin_Anas.consensus
7	FALSE	AnsAna_Oxyura_leucocephala_B10K-D-IZW-106.COL1a2_Anas.consensus	561.925	58.35	58.35	188		0	520	Deamidation (NQ); Dehydration; Proline Oxidation; Proline oxidation to pyroglutamic acid	125309	>AnsAna_Oxyura_leucocephala_B10K-D-IZW-106.COL1a2_Anas.consensus
34	TRUE	AnsAna_Dendrocygna_arborea_B10K-D-IZW-83.Albumin_Anas.consensus	71.3067	1.3	1.3	1	219000	1	1		70045.2	>AnsAna_Dendrocygna_arborea_B10K-D-IZW-83.Albumin_Anas.consensus
29	TRUE	AnsAna_Pteronetta_hartlaubii_D2102046034.COL1a1_Cyg-Gall.consensus	429.66	44.33	44.33	54		0	253	Deamidation (NQ); Leu->Phe substitution; Leu->Trp substitution; Proline Oxidation; Ser->Asp substitution; more	49411.7	>AnsAna_Pteronetta_hartlaubii_D2102046034.COL1a1_Cyg-Gall.consensus
1	FALSE	AnsAna_Chloephaga_melanoptera_B10K-D-WWT-5.COL1a1_Cyg-Gall.consensus	555.28	62.11	62.11	189	77100000	3	732	Ala->Cys substitution; Ala->Phe substitution; Ala->Ser substitution; Deamidation (NQ); Ile->Met substitution; more	134652	>AnsAna_Chloephaga_melanoptera_B10K-D-WWT-5.COL1a1_Cyg-Gall.consensus
1	FALSE	AnsAna_Somateria_mollissima_GCA_951411735.1.COL1a1_Cyg-Gall.consensus	554.595	60.22	60.22	186	77100000	3	722	Deamidation (NQ); Lys->Glu substitution; Proline Oxidation; Val->Pro substitution	137772	>AnsAna_Somateria_mollissima_GCA_951411735.1.COL1a1_Cyg-Gall.consensus
34	TRUE	AnsAna_Tadorna_variegata_D2007020370.Albumin_Anas.consensus	71.3067	1.41	1.41	1	219000	1	1		64068.5	>AnsAna_Tadorna_variegata_D2007020370.Albumin_Anas.consensus
34	TRUE	AnsAna_Cereopsis_novaehollandiae_B10K-D-IZW-75.Albumin_Anas.consensus	71.3067	1.3	1.3	1	219000	1	1		69861.2	>AnsAna_Cereopsis_novaehollandiae_B10K-D-IZW-75.Albumin_Anas.consensus
2	FALSE	AnsAna_Lophodytes_cucullatus_B10K-D-WWT-15.COL1a2_Anas.consensus	566.436	56.68	56.68	198		0	572	Deamidation (NQ); Dehydration; Proline Oxidation; Proline oxidation to pyroglutamic acid	126271	>AnsAna_Lophodytes_cucullatus_B10K-D-WWT-15.COL1a2_Anas.consensus
34	TRUE	AnsAna_Lophodytes_cucullatus_B10K-D-WWT-15.Albumin_Anas.consensus	71.3067	1.3	1.3	1	219000	1	1		69846	>AnsAna_Lophodytes_cucullatus_B10K-D-WWT-15.Albumin_Anas.consensus
1	FALSE	AnsAna_Chloephaga_picta_B10K-D-WWT-7.COL1a1_Cyg-Gall.consensus	553.111	66.96	66.96	182		0	701	Deamidation (NQ); Proline Oxidation	119017	>AnsAna_Chloephaga_picta_B10K-D-WWT-7.COL1a1_Cyg-Gall.consensus
2	FALSE	AnsAna_Aythya_marila_GCA_029042245.1.COL1a2_Anas.consensus	567.532	57.81	57.81	200		0	575	Deamidation (NQ); Dehydration; Proline Oxidation; Proline oxidation to pyroglutamic acid	128912	>AnsAna_Aythya_marila_GCA_029042245.1.COL1a2_Anas.consensus
34	TRUE	AnsAna_Branta_canadensis_D2110088454.Albumin_Anas.consensus	71.3067	1.3	1.3	1	219000	1	1		69910.1	>AnsAna_Branta_canadensis_D2110088454.Albumin_Anas.consensus
18	TRUE	AnsAna_Anser_indicus_GCA_006229135.1.COL1a2_Anas.consensus	548.884	56.2	56.2	177		0	479	Ala->Cys substitution; Ala->Ser substitution; Deamidation (NQ); Dehydration; His->Asp substitution; more	128976	>AnsAna_Anser_indicus_GCA_006229135.1.COL1a2_Anas.consensus
34	TRUE	AnsAna_Oxyura_leucocephala_B10K-D-IZW-106.Albumin_Anas.consensus	71.3067	1.3	1.3	1	219000	1	1		69953.2	>AnsAna_Oxyura_leucocephala_B10K-D-IZW-106.Albumin_Anas.consensus
1	FALSE	AnsAna_Dendrocygna_autumnalis_B10K-D-USNM-95.COL1a1_Cyg-Gall.consensus	493.851	61.04	61.04	103		0	326	Deamidation (NQ); Proline Oxidation	83102.1	>AnsAna_Dendrocygna_autumnalis_B10K-D-USNM-95.COL1a1_Cyg-Gall.consensus
2	FALSE	AnsAna_Cairina_moschata_GCA_018104995.1.COL1a2_Anas.consensus	567.303	56.79	56.79	202		0	605	Ala->Cys substitution; Ala->Ser substitution; Deamidation (NQ); Dehydration; Glu->Gln substitution; more	128856	>AnsAna_Cairina_moschata_GCA_018104995.1.COL1a2_Anas.consensus
1	FALSE	AnsAna_Netta_erythrophthalma_B10K-D-IZW-104.COL1a1_Cyg-Gall.consensus	549.221	65.95	65.95	175		0	652	Deamidation (NQ); Proline Oxidation	117751	>AnsAna_Netta_erythrophthalma_B10K-D-IZW-104.COL1a1_Cyg-Gall.consensus
7	FALSE	AnsAna_Dendrocygna_autumnalis_B10K-D-USNM-95.COL1a2_Anas.consensus	564.365	57.07	57.07	193		0	555	Deamidation (NQ); Dehydration; Proline Oxidation; Proline oxidation to pyroglutamic acid	125300	>AnsAna_Dendrocygna_autumnalis_B10K-D-USNM-95.COL1a2_Anas.consensus
25	TRUE	AnsAna_Cygnus_buccinator_GCA_019232035.1.COL1a2_Anas.consensus	542.686	53.41	53.41	163	903000	1	421	Deamidation (NQ); Dehydration; Proline Oxidation; Val->Gln substitution	128906	>AnsAna_Cygnus_buccinator_GCA_019232035.1.COL1a2_Anas.consensus
39	TRUE	sp|Q9DE65|MIME_COTJA	88.9143	4.44	4.44	1	11900	1	1		33049.1	Mimecan OS=Coturnix japonica OX=93934 GN=OGN PE=2 SV=1
1	FALSE	AnsAna_Anas_acuta_GCA_963932015.1.COL1a1_Cyg-Gall.consensus	553.854	60.01	60.01	183		0	707	Deamidation (NQ); Proline Oxidation	137758	>AnsAna_Anas_acuta_GCA_963932015.1.COL1a1_Cyg-Gall.consensus
2	FALSE	AnsAna_Spatula_versicolor_D2007020420.COL1a2_Anas.consensus	567.775	59.45	59.45	201		0	576	Deamidation (NQ); Dehydration; Proline Oxidation; Proline oxidation to pyroglutamic acid	126281	>AnsAna_Spatula_versicolor_D2007020420.COL1a2_Anas.consensus
1	FALSE	AnsAna_Aythya_affinis_CL200153793_L02.COL1a1_Cyg-Gall.consensus	540.909	83.13	83.13	165	77100000	3	610	Ala->Cys substitution; Ala->Phe substitution; Ala->Ser substitution; Deamidation (NQ); Ile->Met substitution; more	80781.8	>AnsAna_Aythya_affinis_CL200153793_L02.COL1a1_Cyg-Gall.consensus
1	FALSE	AnsAna_Mareca_penelope_GCA_036026335.1.COL1a1_Cyg-Gall.consensus	553.854	60.01	60.01	183		0	707	Deamidation (NQ); Proline Oxidation	137758	>AnsAna_Mareca_penelope_GCA_036026335.1.COL1a1_Cyg-Gall.consensus
34	TRUE	AnsAna_Anas_platyrhynchos_GCA_015476345.1.Albumin_Anas.consensus	71.3067	1.3	1.3	1	219000	1	1		69725.9	>AnsAna_Anas_platyrhynchos_GCA_015476345.1.Albumin_Anas.consensus
34	TRUE	AnsAna_Cygnus_olor_GCA_009769485.2.Albumin_Anas.consensus	71.3067	1.3	1.3	1	219000	1	1		69870.1	>AnsAna_Cygnus_olor_GCA_009769485.2.Albumin_Anas.consensus
2	FALSE	AnsAna_Melanitta_nigra_D2006016004.COL1a2_Anas.consensus	566.436	56.68	56.68	198		0	570	Deamidation (NQ); Dehydration; Proline Oxidation; Proline oxidation to pyroglutamic acid	126271	>AnsAna_Melanitta_nigra_D2006016004.COL1a2_Anas.consensus
1	FALSE	AnsAna_Cyanochen_cyanoptera_B10K-D-WWT-10.COL1a1_Cyg-Gall.consensus	554.595	60.22	60.22	186	77100000	3	720	Deamidation (NQ); Lys->Glu substitution; Proline Oxidation	137742	>AnsAna_Cyanochen_cyanoptera_B10K-D-WWT-10.COL1a1_Cyg-Gall.consensus
18	FALSE	AnsAna_Branta_hutchinsii_B10K-D-MSB-25.COL1a2_Anas.consensus	547.579	56.47	56.47	172		0	449	Deamidation (NQ); Dehydration; Proline Oxidation; Val->Gln substitution	125370	>AnsAna_Branta_hutchinsii_B10K-D-MSB-25.COL1a2_Anas.consensus
34	TRUE	AnsAna_Branta_sandvicensis_D2007017072.Albumin_Anas.consensus	71.3067	1.3	1.3	1	219000	1	1		69910.1	>AnsAna_Branta_sandvicensis_D2007017072.Albumin_Anas.consensus
2	FALSE	AnsAna_Cyanochen_cyanoptera_B10K-D-WWT-10.COL1a2_Anas.consensus	566.436	55.69	55.69	198		0	572	Deamidation (NQ); Dehydration; Proline Oxidation; Proline oxidation to pyroglutamic acid	128872	>AnsAna_Cyanochen_cyanoptera_B10K-D-WWT-10.COL1a2_Anas.consensus
29	FALSE	AnsAna_Chloephaga_rubidiceps_D2104051194.COL1a1_Cyg-Gall.consensus	406.638	43.14	43.14	41		0	211	Deamidation (NQ); Leu->Phe substitution; Leu->Trp substitution; Proline Oxidation; Ser->Asp substitution; more	40938.1	>AnsAna_Chloephaga_rubidiceps_D2104051194.COL1a1_Cyg-Gall.consensus
1	FALSE	AnsAna_Dendrocygna_arborea_B10K-D-IZW-83.COL1a1_Cyg-Gall.consensus	551.663	59.86	59.86	179		0	671	Deamidation (NQ); Proline Oxidation	134620	>AnsAna_Dendrocygna_arborea_B10K-D-IZW-83.COL1a1_Cyg-Gall.consensus
34	TRUE	AnsAna_Chloephaga_poliocephala_B10K-D-IZW-11.Albumin_Anas.consensus	71.3067	1.3	1.3	1	219000	1	1		69838.1	>AnsAna_Chloephaga_poliocephala_B10K-D-IZW-11.Albumin_Anas.consensus
1	FALSE	AnsAna_Branta_canadensis_GCA_006130075.1.COL1a1_Cyg-Gall.consensus	549.322	59.05	59.05	175		0	695	Deamidation (NQ); Proline Oxidation	137768	>AnsAna_Branta_canadensis_GCA_006130075.1.COL1a1_Cyg-Gall.consensus
1	FALSE	AnsAna_Anas_zonorhyncha_GCA_002224875.1.COL1a1_Cyg-Gall.consensus	554.114	60.01	60.01	184		0	708	Deamidation (NQ); Proline Oxidation	137758	>AnsAna_Anas_zonorhyncha_GCA_002224875.1.COL1a1_Cyg-Gall.consensus
2	FALSE	AnsAna_Spatula_clypeata_D2212160216.COL1a2_Anas.consensus	567.775	59.45	59.45	201		0	576	Deamidation (NQ); Dehydration; Proline Oxidation; Proline oxidation to pyroglutamic acid	126281	>AnsAna_Spatula_clypeata_D2212160216.COL1a2_Anas.consensus
21	TRUE	AnsAna_Cygnus_olor_GCA_009769485.2.COL1a2_Anas.consensus	543.619	54.73	54.73	166		0	436	Ala->Cys substitution; Ala->Ser substitution; Deamidation (NQ); His->Asp substitution; Pro->Ala substitution; more	128918	>AnsAna_Cygnus_olor_GCA_009769485.2.COL1a2_Anas.consensus
38	TRUE	sp|P36377|SPRC_CHICK	85.2079	4.36	4.36	1	199000	1	1		34060.5	SPARC OS=Gallus gallus OX=9031 GN=SPARC PE=2 SV=1
34	TRUE	AnsAna_Mareca_strepera_GCA_035583915.1.Albumin_Anas.consensus	71.3067	1.3	1.3	1	219000	1	1		69636.8	>AnsAna_Mareca_strepera_GCA_035583915.1.Albumin_Anas.consensus
33	TRUE	sp|P28675|PGS2_CHICK	171.581	15.41	15.41	4	1080000	4	7	Deamidation (NQ)	39686.9	Decorin OS=Gallus gallus OX=9031 GN=DCN PE=1 SV=1
7	TRUE	AnsAna_Nettapus_auritus_GCA_011076525.1.COL1a2_Anas.consensus	566.124	58.91	58.91	198		0	590	Ala->Cys substitution; Ala->Ser substitution; Deamidation (NQ); Dehydration; Glu->Gln substitution; more	128992	>AnsAna_Nettapus_auritus_GCA_011076525.1.COL1a2_Anas.consensus
2	FALSE	AnsAna_Clangula_hyemalis_GCA_029619115.1.COL1a2_Anas.consensus	561.444	56.79	56.79	188		0	546	Deamidation (NQ); Dehydration; Proline Oxidation; Proline oxidation to pyroglutamic acid	116539	>AnsAna_Clangula_hyemalis_GCA_029619115.1.COL1a2_Anas.consensus
2	FALSE	AnsAna_Spatula_rhynchotis_GCA_034783165.1.COL1a2_Anas.consensus	567.775	58.4	58.4	201		0	576	Deamidation (NQ); Dehydration; Proline Oxidation; Proline oxidation to pyroglutamic acid	128882	>AnsAna_Spatula_rhynchotis_GCA_034783165.1.COL1a2_Anas.consensus
25	FALSE	AnsAna_Cygnus_columbianus_DBG-71.COL1a2_Anas.consensus	542.686	54.74	54.74	163	903000	1	419	Deamidation (NQ); Dehydration; Proline Oxidation	125300	>AnsAna_Cygnus_columbianus_DBG-71.COL1a2_Anas.consensus
16	TRUE	AnsAna_Cereopsis_novaehollandiae_B10K-D-IZW-75.COL1a2_Anas.consensus	565.236	57.97	57.97	194	3840000	2	566	Deamidation (NQ); Dehydration; Proline Oxidation; Proline oxidation to pyroglutamic acid	125388	>AnsAna_Cereopsis_novaehollandiae_B10K-D-IZW-75.COL1a2_Anas.consensus
2	FALSE	AnsAna_Pteronetta_hartlaubii_D2102046034.COL1a2_Anas.consensus	566.436	56.68	56.68	198		0	572	Deamidation (NQ); Dehydration; Proline Oxidation; Proline oxidation to pyroglutamic acid	126271	>AnsAna_Pteronetta_hartlaubii_D2102046034.COL1a2_Anas.consensus
34	TRUE	AnsAna_Oxyura_jamaicensis_GCA_011077185.1.Albumin_Anas.consensus	71.3067	1.3	1.3	1	219000	1	1		69953.2	>AnsAna_Oxyura_jamaicensis_GCA_011077185.1.Albumin_Anas.consensus
1	FALSE	AnsAna_Anas_platyrhynchos_GCA_015476345.1.COL1a1_Cyg-Gall.consensus	554.355	60.01	60.01	185		0	713	Deamidation (NQ); Proline Oxidation	137758	>AnsAna_Anas_platyrhynchos_GCA_015476345.1.COL1a1_Cyg-Gall.consensus
2	FALSE	AnsAna_Marmaronetta_angustirostris_D1907004224.COL1a2_Anas.consensus	567.739	59.22	59.22	201		0	585	Deamidation (NQ); Dehydration; Glu->Gln substitution; His->Asn substitution; His->Asp substitution; more	126311	>AnsAna_Marmaronetta_angustirostris_D1907004224.COL1a2_Anas.consensus
34	TRUE	AnsAna_Asarcornis_scutulata_GCA_013398475.1.Albumin_Anas.consensus	71.3067	1.3	1.3	1	219000	1	1		69731.9	>AnsAna_Asarcornis_scutulata_GCA_013398475.1.Albumin_Anas.consensus
23	TRUE	AnsAna_Cygnus_melancoryphus_CL100153795_L02.COL1a2_Anas.consensus	545.141	56.76	56.76	167		0	432	Deamidation (NQ); Proline Oxidation; Val->Gln substitution	124600	>AnsAna_Cygnus_melancoryphus_CL100153795_L02.COL1a2_Anas.consensus
2	FALSE	AnsAna_Alopochen_aegyptiaca_D1907004292.COL1a2_Anas.consensus	567.303	57.8	57.8	202		0	605	Ala->Cys substitution; Ala->Ser substitution; Deamidation (NQ); Dehydration; Glu->Gln substitution; more	126271	>AnsAna_Alopochen_aegyptiaca_D1907004292.COL1a2_Anas.consensus
2	FALSE	AnsAna_Anas_bernieri_GCA_032165215.1.COL1a2_Anas.consensus	567.775	58.4	58.4	201		0	576	Deamidation (NQ); Dehydration; Proline Oxidation; Proline oxidation to pyroglutamic acid	128882	>AnsAna_Anas_bernieri_GCA_032165215.1.COL1a2_Anas.consensus
34	TRUE	AnsAna_Alopochen_aegyptiaca_D1907004292.Albumin_Anas.consensus	71.3067	1.3	1.3	1	219000	1	1		69778	>AnsAna_Alopochen_aegyptiaca_D1907004292.Albumin_Anas.consensus
1	FALSE	AnsAna_Lophodytes_cucullatus_B10K-D-WWT-15.COL1a1_Cyg-Gall.consensus	547.865	65.74	65.74	172		0	644	Deamidation (NQ); Proline Oxidation	118298	>AnsAna_Lophodytes_cucullatus_B10K-D-WWT-15.COL1a1_Cyg-Gall.consensus
28	TRUE	sp|P02467|CO1A2_CHICK	521.264	47.84	47.84	137		1	338	Deamidation (NQ); Dehydration; Gly->Ala substitution; Proline Oxidation	128995	Collagen alpha-2(I) chain OS=Gallus gallus OX=9031 GN=COL1A2 PE=1 SV=3
32	FALSE	sp|P08250|APOA1_CHICK	137.682	7.58	7.58	2	236000	2	6	Deamidation (NQ)	30680.2	Apolipoprotein A-I OS=Gallus gallus OX=9031 GN=APOA1 PE=1 SV=2
20	TRUE	AnsAna_Chloephaga_picta_B10K-D-IZW-10.COL1a2_Anas.consensus	551.192	56.49	56.49	179		0	497	Deamidation (NQ); Dehydration; His->Asn substitution; His->Asp substitution; Proline Oxidation; more	128858	>AnsAna_Chloephaga_picta_B10K-D-IZW-10.COL1a2_Anas.consensus
34	TRUE	AnsAna_Marmaronetta_angustirostris_D1907004224.Albumin_Anas.consensus	71.3067	1.3	1.3	1	219000	1	1		69703.8	>AnsAna_Marmaronetta_angustirostris_D1907004224.Albumin_Anas.consensus
34	TRUE	AnsAna_Neochen_jubata_B10K-D-WWT-20.Albumin_Anas.consensus	71.3067	1.3	1.3	1	219000	1	1		69829.1	>AnsAna_Neochen_jubata_B10K-D-WWT-20.Albumin_Anas.consensus
16	FALSE	AnsAna_Dendrocygna_arborea_B10K-D-IZW-83.COL1a2_Anas.consensus	564.62	57.07	57.07	193	646000	1	556	Deamidation (NQ); Dehydration; Proline Oxidation; Proline oxidation to pyroglutamic acid	125314	>AnsAna_Dendrocygna_arborea_B10K-D-IZW-83.COL1a2_Anas.consensus
2	FALSE	AnsAna_Aythya_collaris_D1907001858.COL1a2_Anas.consensus	567.532	57.81	57.81	200		0	573	Deamidation (NQ); Dehydration; Proline Oxidation; Proline oxidation to pyroglutamic acid	128912	>AnsAna_Aythya_collaris_D1907001858.COL1a2_Anas.consensus
2	FALSE	AnsAna_Melanitta_fusca_GCA_029620185.1.COL1a2_Anas.consensus	566.436	55.69	55.69	198		0	572	Deamidation (NQ); Dehydration; Proline Oxidation; Proline oxidation to pyroglutamic acid	128872	>AnsAna_Melanitta_fusca_GCA_029620185.1.COL1a2_Anas.consensus
2	FALSE	AnsAna_Anas_zonorhyncha_GCA_002224875.1.COL1a2_Anas.consensus	567.775	59.45	59.45	201		0	574	Deamidation (NQ); Dehydration; Proline Oxidation; Proline oxidation to pyroglutamic acid	126281	>AnsAna_Anas_zonorhyncha_GCA_002224875.1.COL1a2_Anas.consensus
1	FALSE	AnsAna_Anas_georgica_GCA_032275265.1.COL1a1_Cyg-Gall.consensus	553.854	63.33	63.33	183		0	705	Deamidation (NQ); Proline Oxidation	129496	>AnsAna_Anas_georgica_GCA_032275265.1.COL1a1_Cyg-Gall.consensus
2	FALSE	AnsAna_Mergus_merganser_D1907004324.COL1a2_Anas.consensus	565.599	55.19	55.19	196		0	569	Deamidation (NQ); Dehydration; Proline Oxidation; Proline oxidation to pyroglutamic acid	126257	>AnsAna_Mergus_merganser_D1907004324.COL1a2_Anas.consensus
34	TRUE	AnsAna_Anser_indicus_GCA_006229135.1.Albumin_Anas.consensus	71.3067	1.3	1.3	1	219000	1	1		69910.1	>AnsAna_Anser_indicus_GCA_006229135.1.Albumin_Anas.consensus
7	FALSE	AnsAna_Thalassornis_leuconotus_D2102046040.COL1a2_Anas.consensus	561.939	55.49	55.49	188		0	539	Deamidation (NQ); Dehydration; Proline Oxidation; Proline oxidation to pyroglutamic acid	125329	>AnsAna_Thalassornis_leuconotus_D2102046040.COL1a2_Anas.consensus
22	TRUE	AnsAna_Anser_rossii_D1907004357.COL1a2_Anas.consensus	547.861	57.07	57.07	173		0	448	Deamidation (NQ); Dehydration; Proline Oxidation	125326	>AnsAna_Anser_rossii_D1907004357.COL1a2_Anas.consensus
1	FALSE	AnsAna_Spatula_smithii_GCA_035221675.1.COL1a1_Cyg-Gall.consensus	553.854	61.19	61.19	183		0	705	Deamidation (NQ); Proline Oxidation	134668	>AnsAna_Spatula_smithii_GCA_035221675.1.COL1a1_Cyg-Gall.consensus
11	TRUE	AnsAna_Mareca_penelope_GCA_036026335.1.COL1a2_Anas.consensus	567.92	59.5	59.5	201	1190000	1	592	Deamidation (NQ); Dehydration; Glu->Arg substitution; Gly->Ala substitution; Proline Oxidation; more	128897	>AnsAna_Mareca_penelope_GCA_036026335.1.COL1a2_Anas.consensus
7	FALSE	AnsAna_Heteronetta_atricapilla_GCA_011075105.1.COL1a2_Anas.consensus	565.485	58.2	58.2	195		0	557	Deamidation (NQ); Dehydration; Proline Oxidation; Proline oxidation to pyroglutamic acid	127868	>AnsAna_Heteronetta_atricapilla_GCA_011075105.1.COL1a2_Anas.consensus
18	FALSE	AnsAna_Anser_anser_DBG-36.COL1a2_Anas.consensus	547.579	56.47	56.47	172		0	439	Deamidation (NQ); Dehydration; Proline Oxidation	125356	>AnsAna_Anser_anser_DBG-36.COL1a2_Anas.consensus
34	TRUE	AnsAna_Melanitta_perspicillata_D1907004383.Albumin_Anas.consensus	71.3067	1.3	1.3	1	219000	1	1		69832	>AnsAna_Melanitta_perspicillata_D1907004383.Albumin_Anas.consensus
1	FALSE	AnsAna_Speculanas_specularis_GCA_032165255.1.COL1a1_Cyg-Gall.consensus	554.114	60.51	60.51	184		0	708	Deamidation (NQ); Proline Oxidation	136571	>AnsAna_Speculanas_specularis_GCA_032165255.1.COL1a1_Cyg-Gall.consensus
2	FALSE	AnsAna_Chenonetta_jubata_D2007020407.COL1a2_Anas.consensus	567.236	57.58	57.58	200		0	574	Deamidation (NQ); Dehydration; Proline Oxidation; Proline oxidation to pyroglutamic acid	126287	>AnsAna_Chenonetta_jubata_D2007020407.COL1a2_Anas.consensus
18	FALSE	AnsAna_Branta_sandvicensis_D2007017072.COL1a2_Anas.consensus	547.579	56.47	56.47	172		0	449	Deamidation (NQ); Dehydration; Proline Oxidation; Val->Gln substitution	125370	>AnsAna_Branta_sandvicensis_D2007017072.COL1a2_Anas.consensus
2	FALSE	AnsAna_Aythya_affinis_CL200153793_L02.COL1a2_Anas.consensus	567.532	58.85	58.85	200		0	574	Deamidation (NQ); Dehydration; Proline Oxidation; Proline oxidation to pyroglutamic acid	126311	>AnsAna_Aythya_affinis_CL200153793_L02.COL1a2_Anas.consensus
34	TRUE	AnsAna_Cygnus_cygnus_GCA_014362685.1.Albumin_Anas.consensus	71.3067	1.3	1.3	1	219000	1	1		69959.1	>AnsAna_Cygnus_cygnus_GCA_014362685.1.Albumin_Anas.consensus
6	TRUE	AnsAna_Tadorna_cana_B10K-D-IZW-124.COL1a1_Cyg-Gall.consensus	544.963	64.92	64.92	166	1480000	2	625	Deamidation (NQ); Proline Oxidation	105913	>AnsAna_Tadorna_cana_B10K-D-IZW-124.COL1a1_Cyg-Gall.consensus
34	TRUE	AnsAna_Melanitta_fusca_GCA_029620185.1.Albumin_Anas.consensus	71.3067	1.3	1.3	1	219000	1	1		69832	>AnsAna_Melanitta_fusca_GCA_029620185.1.Albumin_Anas.consensus
40	TRUE	sp|O93510|GELS_CHICK	42.7604	1.03	1.03	1	12600	1	1		85831.7	Gelsolin OS=Gallus gallus OX=9031 GN=GSN PE=2 SV=1
34	TRUE	AnsAna_Spatula_platalea_D2007020414.Albumin_Anas.consensus	71.3067	1.3	1.3	1	219000	1	1		69845.1	>AnsAna_Spatula_platalea_D2007020414.Albumin_Anas.consensus
2	FALSE	AnsAna_Anas_capensis_GCA_032357685.1.COL1a2_Anas.consensus	567.775	58.4	58.4	201		0	575	Deamidation (NQ); Dehydration; Proline Oxidation; Proline oxidation to pyroglutamic acid	128882	>AnsAna_Anas_capensis_GCA_032357685.1.COL1a2_Anas.consensus
29	FALSE	AnsAna_Polysticta_stelleri_D2301166173.COL1a1_Cyg-Gall.consensus	405.263	63.7	63.7	41		0	211	Deamidation (NQ); Leu->Phe substitution; Leu->Trp substitution; Proline Oxidation; Ser->Asp substitution; more	25959.4	>AnsAna_Polysticta_stelleri_D2301166173.COL1a1_Cyg-Gall.consensus
24	FALSE	AnsAna_Chloephaga_hybrida_D2104051195.COL1a1_Cyg-Gall.consensus	424.98	63.64	63.64	50		0	237	Deamidation (NQ); Leu->Trp substitution; Proline Oxidation	28663.3	>AnsAna_Chloephaga_hybrida_D2104051195.COL1a1_Cyg-Gall.consensus
34	TRUE	AnsAna_Anas_gibberifrons_D2007020344.Albumin_Anas.consensus	71.3067	1.3	1.3	1	219000	1	1		69667.9	>AnsAna_Anas_gibberifrons_D2007020344.Albumin_Anas.consensus
24	FALSE	AnsAna_Alopochen_aegyptiaca_D1907004292.COL1a1_Cyg-Gall.consensus	428.096	46.22	46.22	52		0	244	Deamidation (NQ); Leu->Trp substitution; Proline Oxidation	44239.7	>AnsAna_Alopochen_aegyptiaca_D1907004292.COL1a1_Cyg-Gall.consensus
18	FALSE	AnsAna_Anser_cygnoides_GCA_002166845.1.COL1a2_Anas.consensus	547.579	55.1	55.1	172		0	449	Deamidation (NQ); Dehydration; Proline Oxidation; Val->Gln substitution	128976	>AnsAna_Anser_cygnoides_GCA_002166845.1.COL1a2_Anas.consensus
2	FALSE	AnsAna_Plectropterus_gambensis_B10K-D-WWT-22.COL1a2_Anas.consensus	559.85	55.04	55.04	185		0	512	Deamidation (NQ); Dehydration; Proline Oxidation; Proline oxidation to pyroglutamic acid	126283	>AnsAna_Plectropterus_gambensis_B10K-D-WWT-22.COL1a2_Anas.consensus
12	TRUE	AnsAna_Anas_acuta_GCA_963932015.1.COL1a2_Anas.consensus	568.243	59.28	59.28	202	75400	1	583	Deamidation (NQ); Dehydration; Proline Oxidation; Proline oxidation to pyroglutamic acid; Ser->Thr substitution	128913	>AnsAna_Anas_acuta_GCA_963932015.1.COL1a2_Anas.consensus
2	FALSE	AnsAna_Polysticta_stelleri_D2301166173.COL1a2_Anas.consensus	566.436	56.68	56.68	198		0	572	Deamidation (NQ); Dehydration; Proline Oxidation; Proline oxidation to pyroglutamic acid	126271	>AnsAna_Polysticta_stelleri_D2301166173.COL1a2_Anas.consensus
2	FALSE	AnsAna_Spatula_querquedula_GCA_032191525.1.COL1a2_Anas.consensus	563.777	58.03	58.03	194		0	577	Ala->Cys substitution; Ala->Ser substitution; Deamidation (NQ); Dehydration; Glu->Gln substitution; more	126076	>AnsAna_Spatula_querquedula_GCA_032191525.1.COL1a2_Anas.consensus
1	FALSE	AnsAna_Mareca_sibilatrix_GCA_034783215.1.COL1a1_Cyg-Gall.consensus	550.333	58.89	58.89	181	77100000	3	691	Ala->Cys substitution; Ala->Phe substitution; Ala->Ser substitution; Deamidation (NQ); Ile->Met substitution; more	135471	>AnsAna_Mareca_sibilatrix_GCA_034783215.1.COL1a1_Cyg-Gall.consensus
34	TRUE	AnsAna_Aix_sponsa_B10K-D-WWT-1.Albumin_Anas.consensus	71.3067	1.3	1.3	1	219000	1	1		69761.9	>AnsAna_Aix_sponsa_B10K-D-WWT-1.Albumin_Anas.consensus
24	FALSE	AnsAna_Somateria_spectabilis_D2006016067.COL1a1_Cyg-Gall.consensus	427.177	41.65	41.65	51		0	242	Deamidation (NQ); Leu->Trp substitution; Proline Oxidation	49411.7	>AnsAna_Somateria_spectabilis_D2006016067.COL1a1_Cyg-Gall.consensus
34	TRUE	AnsAna_Mareca_sibilatrix_GCA_034783215.1.Albumin_Anas.consensus	71.3067	1.3	1.3	1	219000	1	1		69746.9	>AnsAna_Mareca_sibilatrix_GCA_034783215.1.Albumin_Anas.consensus
2	FALSE	AnsAna_Spatula_platalea_D2007020414.COL1a2_Anas.consensus	567.775	59.45	59.45	201		0	576	Deamidation (NQ); Dehydration; Proline Oxidation; Proline oxidation to pyroglutamic acid	126281	>AnsAna_Spatula_platalea_D2007020414.COL1a2_Anas.consensus
1	FALSE	AnsAna_Lophonetta_specularioides_GCA_032165235.1.COL1a1_Cyg-Gall.consensus	552.245	59.72	59.72	181	77100000	3	713	Deamidation (NQ); Lys->Glu substitution; Proline Oxidation	137105	>AnsAna_Lophonetta_specularioides_GCA_032165235.1.COL1a1_Cyg-Gall.consensus
2	FALSE	AnsAna_Tadorna_variegata_D2007020370.COL1a2_Anas.consensus	566.436	56.68	56.68	198		0	572	Deamidation (NQ); Dehydration; Proline Oxidation; Proline oxidation to pyroglutamic acid	126271	>AnsAna_Tadorna_variegata_D2007020370.COL1a2_Anas.consensus
41	TRUE	sp|Q9PWA1|RGS20_CHICK	48.8111	9.63	9.63	1		1	1	Proline Oxidation	25141.3	Regulator of G-protein signaling 20 OS=Gallus gallus OX=9031 GN=RGS20 PE=2 SV=1
34	TRUE	AnsAna_Aythya_marila_GCA_029042245.1.Albumin_Anas.consensus	71.3067	1.3	1.3	1	219000	1	1		69762.9	>AnsAna_Aythya_marila_GCA_029042245.1.Albumin_Anas.consensus
42	TRUE	sp|P02552|TBA1A_CHICK	52.844	3.33	3.33	1	4110	1	1		50135.6	Tubulin alpha-1A chain OS=Gallus gallus OX=9031 GN=TUBA1A PE=1 SV=2
1	FALSE	AnsAna_Mareca_americana_GCA_035588595.1.COL1a1_Cyg-Gall.consensus	548.92	56.91	56.91	173		0	661	Ala->Cys substitution; Deamidation (NQ); Proline Oxidation	128037	>AnsAna_Mareca_americana_GCA_035588595.1.COL1a1_Cyg-Gall.consensus
1	FALSE	AnsAna_Spatula_querquedula_GCA_032191525.1.COL1a1_Cyg-Gall.consensus	554.114	60.01	60.01	184		0	708	Deamidation (NQ); Proline Oxidation	137758	>AnsAna_Spatula_querquedula_GCA_032191525.1.COL1a1_Cyg-Gall.consensus
34	TRUE	AnsAna_Anas_melleri_B10K-D-IZW-60.Albumin_Anas.consensus	71.3067	1.3	1.3	1	219000	1	1		69725.9	>AnsAna_Anas_melleri_B10K-D-IZW-60.Albumin_Anas.consensus
2	FALSE	AnsAna_Netta_erythrophthalma_B10K-D-IZW-104.COL1a2_Anas.consensus	567.532	58.85	58.85	200		0	575	Deamidation (NQ); Dehydration; Proline Oxidation; Proline oxidation to pyroglutamic acid	126311	>AnsAna_Netta_erythrophthalma_B10K-D-IZW-104.COL1a2_Anas.consensus
34	TRUE	AnsAna_Dendrocygna_guttata_B10K-D-IZW-85.Albumin_Anas.consensus	71.3067	1.3	1.3	1	219000	1	1		69955.1	>AnsAna_Dendrocygna_guttata_B10K-D-IZW-85.Albumin_Anas.consensus
7	FALSE	AnsAna_Dendrocygna_bicolor_B10K-D-IZW-84.COL1a2_Anas.consensus	565.011	57.89	57.89	196		0	586	Ala->Cys substitution; Ala->Ser substitution; Deamidation (NQ); Dehydration; Glu->Gln substitution; more	126055	>AnsAna_Dendrocygna_bicolor_B10K-D-IZW-84.COL1a2_Anas.consensus
2	FALSE	AnsAna_Aythya_nyroca_MOB-23.COL1a2_Anas.consensus	567.532	58.85	58.85	200		0	573	Deamidation (NQ); Dehydration; Proline Oxidation; Proline oxidation to pyroglutamic acid	126311	>AnsAna_Aythya_nyroca_MOB-23.COL1a2_Anas.consensus
2	FALSE	AnsAna_Aix_sponsa_B10K-D-WWT-1.COL1a2_Anas.consensus	566.122	56.01	56.01	197		0	571	Deamidation (NQ); Dehydration; Proline Oxidation; Proline oxidation to pyroglutamic acid	126269	>AnsAna_Aix_sponsa_B10K-D-WWT-1.COL1a2_Anas.consensus
2	FALSE	AnsAna_Anas_luzonica_B10K-D-IZW-59.COL1a2_Anas.consensus	568.63	60.57	60.57	205		0	608	Ala->Cys substitution; Ala->Ser substitution; Deamidation (NQ); Dehydration; Glu->Gln substitution; more	126281	>AnsAna_Anas_luzonica_B10K-D-IZW-59.COL1a2_Anas.consensus
34	TRUE	AnsAna_Melanitta_nigra_D2006016004.Albumin_Anas.consensus	71.3067	1.3	1.3	1	219000	1	1		69863	>AnsAna_Melanitta_nigra_D2006016004.Albumin_Anas.consensus
2	FALSE	AnsAna_Aix_galericulata_GCA_024635365.1.COL1a2_Anas.consensus	566.995	56.13	56.13	201		0	604	Ala->Cys substitution; Ala->Ser substitution; Deamidation (NQ); Dehydration; Glu->Gln substitution; more	128870	>AnsAna_Aix_galericulata_GCA_024635365.1.COL1a2_Anas.consensus
34	TRUE	AnsAna_Netta_erythrophthalma_B10K-D-IZW-104.Albumin_Anas.consensus	71.3067	1.3	1.3	1	219000	1	1		69762.9	>AnsAna_Netta_erythrophthalma_B10K-D-IZW-104.Albumin_Anas.consensus
1	FALSE	AnsAna_Anas_undulata_B10K-D-IZW-61.COL1a1_Cyg-Gall.consensus	544.825	65.26	65.26	168		0	635	Deamidation (NQ); Proline Oxidation	115455	>AnsAna_Anas_undulata_B10K-D-IZW-61.COL1a1_Cyg-Gall.consensus
2	FALSE	AnsAna_Spatula_discors_GCA_032165275.1.COL1a2_Anas.consensus	567.775	58.4	58.4	201		0	574	Deamidation (NQ); Dehydration; Proline Oxidation; Proline oxidation to pyroglutamic acid	128882	>AnsAna_Spatula_discors_GCA_032165275.1.COL1a2_Anas.consensus
34	TRUE	AnsAna_Anas_fulvigula_D2005012408.Albumin_Anas.consensus	71.3067	1.3	1.3	1	219000	1	1		69725.9	>AnsAna_Anas_fulvigula_D2005012408.Albumin_Anas.consensus
37	TRUE	sp|P51890|LUM_CHICK	91.9658	2.92	2.92	1	181000	1	2		38642.4	Lumican OS=Gallus gallus OX=9031 GN=LUM PE=1 SV=1
18	FALSE	AnsAna_Branta_bernicla_D2007020471.COL1a2_Anas.consensus	547.579	56.47	56.47	172		0	449	Deamidation (NQ); Dehydration; Proline Oxidation; Val->Gln substitution	125370	>AnsAna_Branta_bernicla_D2007020471.COL1a2_Anas.consensus
34	TRUE	AnsAna_Somateria_spectabilis_D2006016067.Albumin_Anas.consensus	71.3067	1.3	1.3	1	219000	1	1		69978.1	>AnsAna_Somateria_spectabilis_D2006016067.Albumin_Anas.consensus
34	TRUE	AnsAna_Branta_leucopsis_DBGNRM65.Albumin_Anas.consensus	71.3067	1.3	1.3	1	219000	1	1		69910.1	>AnsAna_Branta_leucopsis_DBGNRM65.Albumin_Anas.consensus
2	FALSE	AnsAna_Bucephala_clangula_DBGNRM73.COL1a2_Anas.consensus	567.303	57.8	57.8	202		0	605	Ala->Cys substitution; Ala->Ser substitution; Deamidation (NQ); Dehydration; Glu->Gln substitution; more	126271	>AnsAna_Bucephala_clangula_DBGNRM73.COL1a2_Anas.consensus
10	TRUE	AnsAna_Branta_leucopsis_DBGNRM65.COL1a1_Cyg-Gall.consensus	533.079	65.67	65.67	152		0	616	Ala->Cys substitution; Ala->Phe substitution; Ala->Ser substitution; Deamidation (NQ); Ile->Met substitution; more	98424	>AnsAna_Branta_leucopsis_DBGNRM65.COL1a1_Cyg-Gall.consensus
34	TRUE	AnsAna_Melanitta_americana_D2212160212.Albumin_Anas.consensus	71.3067	1.3	1.3	1	219000	1	1		69863	>AnsAna_Melanitta_americana_D2212160212.Albumin_Anas.consensus
34	TRUE	AnsAna_Tadorna_tadorna_B10K-D-WWT-25.Albumin_Anas.consensus	71.3067	1.3	1.3	1	219000	1	1		69822	>AnsAna_Tadorna_tadorna_B10K-D-WWT-25.Albumin_Anas.consensus
1	FALSE	AnsAna_Cygnus_cygnus_DBG88.COL1a1_Cyg-Gall.consensus	537.753	62.12	62.12	155		0	589	Deamidation (NQ); Proline Oxidation	105691	>AnsAna_Cygnus_cygnus_DBG88.COL1a1_Cyg-Gall.consensus
21	FALSE	AnsAna_Cygnus_olor_GCA_009769625.2.COL1a2_Anas.consensus	543.619	54.73	54.73	166		0	433	Ala->Cys substitution; Ala->Ser substitution; Deamidation (NQ); His->Asp substitution; Pro->Ala substitution; more	128904	>AnsAna_Cygnus_olor_GCA_009769625.2.COL1a2_Anas.consensus
1	TRUE	AnsAna_Aythya_fuligula_GCA_009819845.1.COL1a1_Cyg-Gall.consensus	556.228	62.08	62.08	193	166000000	4	750	Ala->Cys substitution; Ala->Phe substitution; Ala->Ser substitution; Deamidation (NQ); Ile->Met substitution; more	137758	>AnsAna_Aythya_fuligula_GCA_009819845.1.COL1a1_Cyg-Gall.consensus
34	TRUE	AnsAna_Cygnus_melancoryphus_CL100153795_L02.Albumin_Anas.consensus	71.3067	1.36	1.36	1	219000	1	1		66813.4	>AnsAna_Cygnus_melancoryphus_CL100153795_L02.Albumin_Anas.consensus
1	TRUE	AnsAna_Anas_bernieri_GCA_032165215.1.COL1a1_Cyg-Gall.consensus	556.228	62.08	62.08	193	166000000	4	750	Ala->Cys substitution; Ala->Phe substitution; Ala->Ser substitution; Deamidation (NQ); Ile->Met substitution; more	137758	>AnsAna_Anas_bernieri_GCA_032165215.1.COL1a1_Cyg-Gall.consensus
34	TRUE	AnsAna_Netta_rufina_MOB-64.Albumin_Anas.consensus	71.3067	1.3	1.3	1	219000	1	1		69777	>AnsAna_Netta_rufina_MOB-64.Albumin_Anas.consensus
34	TRUE	AnsAna_Cyanochen_cyanoptera_B10K-D-WWT-10.Albumin_Anas.consensus	71.3067	1.3	1.3	1	219000	1	1		69745.9	>AnsAna_Cyanochen_cyanoptera_B10K-D-WWT-10.Albumin_Anas.consensus
34	TRUE	AnsAna_Anas_luzonica_B10K-D-IZW-59.Albumin_Anas.consensus	71.3067	1.3	1.3	1	219000	1	1		69725.9	>AnsAna_Anas_luzonica_B10K-D-IZW-59.Albumin_Anas.consensus
18	FALSE	AnsAna_Branta_ruficollis_D2104051282.COL1a2_Anas.consensus	547.579	56.47	56.47	172		0	439	Deamidation (NQ); Dehydration; Proline Oxidation	125370	>AnsAna_Branta_ruficollis_D2104051282.COL1a2_Anas.consensus
34	TRUE	AnsAna_Tadorna_cana_B10K-D-IZW-124.Albumin_Anas.consensus	71.3067	1.3	1.3	1	219000	1	1		69822	>AnsAna_Tadorna_cana_B10K-D-IZW-124.Albumin_Anas.consensus
39	TRUE	sp|Q9W6H0|MIME_CHICK	88.9143	4.42	4.42	1	11900	1	1		33179.2	Mimecan OS=Gallus gallus OX=9031 GN=OGN PE=2 SV=1
1	FALSE	AnsAna_Dendrocygna_viduata_CL100160616_L02.COL1a1_Cyg-Gall.consensus	491.309	62.21	62.21	101		0	320	Deamidation (NQ); Proline Oxidation	78609	>AnsAna_Dendrocygna_viduata_CL100160616_L02.COL1a1_Cyg-Gall.consensus
1	FALSE	AnsAna_Tachyeres_brachypterus_GCA_032357605.1.COL1a1_Cyg-Gall.consensus	552.157	60.01	60.01	184	77100000	3	699	Ala->Cys substitution; Ala->Phe substitution; Ala->Ser substitution; Deamidation (NQ); Ile->Met substitution; more	134845	>AnsAna_Tachyeres_brachypterus_GCA_032357605.1.COL1a1_Cyg-Gall.consensus
34	TRUE	AnsAna_Spatula_smithii_GCA_035221675.1.Albumin_Anas.consensus	71.3067	1.3	1.3	1	219000	1	1		69873.1	>AnsAna_Spatula_smithii_GCA_035221675.1.Albumin_Anas.consensus
34	TRUE	AnsAna_Aix_galericulata_GCA_024635365.1.Albumin_Anas.consensus	71.3067	1.3	1.3	1	219000	1	1		69794	>AnsAna_Aix_galericulata_GCA_024635365.1.Albumin_Anas.consensus
1	FALSE	AnsAna_Anser_brachyrhynchus_GCA_002592135.1.COL1a1_Cyg-Gall.consensus	549.299	59.09	59.09	176		0	676	Deamidation (NQ); Proline Oxidation	136179	>AnsAna_Anser_brachyrhynchus_GCA_002592135.1.COL1a1_Cyg-Gall.consensus
5	TRUE	AnsAna_Asarcornis_scutulata_GCA_013398475.1.COL1a2_Anas.consensus	567.892	58.18	58.18	203		0	606	Ala->Cys substitution; Ala->Ser substitution; Deamidation (NQ); Dehydration; Glu->Gln substitution; more	128938	>AnsAna_Asarcornis_scutulata_GCA_013398475.1.COL1a2_Anas.consensus
1	FALSE	AnsAna_Cairina_moschata_GCA_009194515.1.COL1a1_Cyg-Gall.consensus	554.114	60.01	60.01	184		0	708	Deamidation (NQ); Proline Oxidation	137758	>AnsAna_Cairina_moschata_GCA_009194515.1.COL1a1_Cyg-Gall.consensus
34	TRUE	AnsAna_Anas_superciliosa_D2006016005.Albumin_Anas.consensus	71.3067	1.3	1.3	1	219000	1	1		69725.9	>AnsAna_Anas_superciliosa_D2006016005.Albumin_Anas.consensus
34	TRUE	AnsAna_Tachyeres_brachypterus_GCA_032357605.1.Albumin_Anas.consensus	71.3067	1.3	1.3	1	219000	1	1		69851.1	>AnsAna_Tachyeres_brachypterus_GCA_032357605.1.Albumin_Anas.consensus
1	FALSE	AnsAna_Plectropterus_gambensis_B10K-D-WWT-22.COL1a1_Cyg-Gall.consensus	464.377	62.4	62.4	77		0	281	Ala->Cys substitution; Ala->Ser substitution; Deamidation (NQ); Ile->Met substitution; Leu->Asn substitution; more	56024	>AnsAna_Plectropterus_gambensis_B10K-D-WWT-22.COL1a1_Cyg-Gall.consensus
34	TRUE	AnsAna_Spatula_clypeata_D2212160216.Albumin_Anas.consensus	71.3067	1.3	1.3	1	219000	1	1		69873.1	>AnsAna_Spatula_clypeata_D2212160216.Albumin_Anas.consensus
3	TRUE	AnsAna_Spatula_discors_GCA_032165275.1.COL1a1_Cyg-Gall.consensus	534.146	65.3	65.3	155		1	625	Ala->Cys substitution; Ala->Phe substitution; Ala->Ser substitution; Deamidation (NQ); Ile->Met substitution; more	106440	>AnsAna_Spatula_discors_GCA_032165275.1.COL1a1_Cyg-Gall.consensus
17	TRUE	AnsAna_Aix_sponsa_GCA_032270905.1.COL1a1_Cyg-Gall.consensus	531.458	58.9	58.9	146	290000000	12	562	Deamidation (NQ); Proline Oxidation	118200	>AnsAna_Aix_sponsa_GCA_032270905.1.COL1a1_Cyg-Gall.consensus
26	TRUE	AnsAna_Oxyura_leucocephala_B10K-D-IZW-106.COL1a1_Cyg-Gall.consensus	497.488	60.37	60.37	108		0	452	Deamidation (NQ); Leu->Trp substitution; Proline Oxidation	82247.2	>AnsAna_Oxyura_leucocephala_B10K-D-IZW-106.COL1a1_Cyg-Gall.consensus
34	TRUE	AnsAna_Coscoroba_coscoroba_D2102046636.Albumin_Anas.consensus	71.3067	1.3	1.3	1	219000	1	1		69710	>AnsAna_Coscoroba_coscoroba_D2102046636.Albumin_Anas.consensus
18	FALSE	AnsAna_Branta_leucopsis_DBGNRM65.COL1a2_Anas.consensus	547.579	56.47	56.47	172		0	449	Deamidation (NQ); Dehydration; Proline Oxidation; Val->Gln substitution	125370	>AnsAna_Branta_leucopsis_DBGNRM65.COL1a2_Anas.consensus
34	TRUE	AnsAna_Chloephaga_picta_B10K-D-WWT-7.Albumin_Anas.consensus	71.3067	1.3	1.3	1	219000	1	1		69801.1	>AnsAna_Chloephaga_picta_B10K-D-WWT-7.Albumin_Anas.consensus
30	TRUE	AnsAna_Melanitta_americana_D2212160212.COL1a1_Cyg-Gall.consensus	414.365	46.22	46.22	48	919000	1	220	Deamidation (NQ); Leu->Trp substitution; Proline Oxidation	44269.7	>AnsAna_Melanitta_americana_D2212160212.COL1a1_Cyg-Gall.consensus
2	FALSE	AnsAna_Anas_melleri_B10K-D-IZW-60.COL1a2_Anas.consensus	567.775	59.45	59.45	201		0	575	Deamidation (NQ); Dehydration; Proline Oxidation; Proline oxidation to pyroglutamic acid	126281	>AnsAna_Anas_melleri_B10K-D-IZW-60.COL1a2_Anas.consensus
34	TRUE	AnsAna_Anas_zonorhyncha_GCA_002224875.1.Albumin_Anas.consensus	71.3067	1.3	1.3	1	219000	1	1		69725.9	>AnsAna_Anas_zonorhyncha_GCA_002224875.1.Albumin_Anas.consensus
34	TRUE	AnsAna_Anas_bernieri_GCA_032165215.1.Albumin_Anas.consensus	71.3067	1.3	1.3	1	219000	1	1		69653.8	>AnsAna_Anas_bernieri_GCA_032165215.1.Albumin_Anas.consensus
34	TRUE	AnsAna_Histrionicus_histrionicus_D1907004311.Albumin_Anas.consensus	71.3067	1.3	1.3	1	219000	1	1		69948.1	>AnsAna_Histrionicus_histrionicus_D1907004311.Albumin_Anas.consensus
18	FALSE	AnsAna_Anser_indicus_GCA_025583725.1.COL1a2_Anas.consensus	547.133	54	54	171		0	447	Deamidation (NQ); Dehydration; Proline Oxidation; Val->Gln substitution	128992	>AnsAna_Anser_indicus_GCA_025583725.1.COL1a2_Anas.consensus
2	FALSE	AnsAna_Anas_gibberifrons_D2007020344.COL1a2_Anas.consensus	569.032	59.65	59.65	205		0	601	Deamidation (NQ); Dehydration; Glu->Gln substitution; His->Asn substitution; His->Asp substitution; more	128898	>AnsAna_Anas_gibberifrons_D2007020344.COL1a2_Anas.consensus
34	TRUE	AnsAna_Aythya_affinis_CL200153793_L02.Albumin_Anas.consensus	71.3067	1.3	1.3	1	219000	1	1		69762.9	>AnsAna_Aythya_affinis_CL200153793_L02.Albumin_Anas.consensus
1	FALSE	AnsAna_Cygnus_buccinator_GCA_019232035.1.COL1a1_Cyg-Gall.consensus	546.071	57.6	57.6	170		0	631	Deamidation (NQ); Proline Oxidation	137776	>AnsAna_Cygnus_buccinator_GCA_019232035.1.COL1a1_Cyg-Gall.consensus
34	TRUE	AnsAna_Branta_hutchinsii_GCA_032270845.1.Albumin_Anas.consensus	71.3067	1.31	1.31	1	219000	1	1		69385.5	>AnsAna_Branta_hutchinsii_GCA_032270845.1.Albumin_Anas.consensus
2	FALSE	AnsAna_Speculanas_specularis_GCA_032165255.1.COL1a2_Anas.consensus	567.775	58.4	58.4	201		0	574	Deamidation (NQ); Dehydration; Proline Oxidation; Proline oxidation to pyroglutamic acid	128882	>AnsAna_Speculanas_specularis_GCA_032165255.1.COL1a2_Anas.consensus
34	TRUE	AnsAna_Spatula_versicolor_D2007020420.Albumin_Anas.consensus	71.3067	1.3	1.3	1	219000	1	1		69771	>AnsAna_Spatula_versicolor_D2007020420.Albumin_Anas.consensus
2	FALSE	AnsAna_Melanitta_perspicillata_D1907004383.COL1a2_Anas.consensus	566.436	56.68	56.68	198		0	570	Deamidation (NQ); Dehydration; Proline Oxidation; Proline oxidation to pyroglutamic acid	126271	>AnsAna_Melanitta_perspicillata_D1907004383.COL1a2_Anas.consensus
34	TRUE	AnsAna_Branta_bernicla_D2007020471.Albumin_Anas.consensus	71.3067	1.3	1.3	1	219000	1	1		69808	>AnsAna_Branta_bernicla_D2007020471.Albumin_Anas.consensus
32	TRUE	sp|O42296|APOA1_ANAPL	237.555	33.33	33.33	8	1240000	8	15	Deamidation (NQ)	30659.2	Apolipoprotein A-I OS=Anas platyrhynchos OX=8839 GN=APOA1 PE=2 SV=1
1	FALSE	AnsAna_Dendrocygna_guttata_B10K-D-IZW-85.COL1a1_Cyg-Gall.consensus	548.583	60.63	60.63	178	77100000	3	695	Ala->Cys substitution; Ala->Phe substitution; Ala->Ser substitution; Deamidation (NQ); Ile->Met substitution; more	133005	>AnsAna_Dendrocygna_guttata_B10K-D-IZW-85.COL1a1_Cyg-Gall.consensus

## Sheet: ST15 sample148_spider.peptides
Supplementary Table 15. PEAKS 11 peptides output for reanalysis of LC-MS/MS data of MC148
Peptide	-10LgP	Mass	Length	ppm	m/z	z	RT	Scan	Source File	Area sample148	#Feature	#Feature sample148	PTM	AScore	Accession	Found By
AADFGP(+15.99)GP(+15.99)MGLMGPR	54.28	1504.68	15	-0.2	753.347	2	42.332	30403	20201209_Lumos_Ritcher_sample148_17.raw		0	0	Proline Oxidation;Proline Oxidation	P6:Proline Oxidation:19.61;P8:Proline Oxidation:22.09	AnsAna_Spatula_platalea_D2007020414.COL1a2_Anas.consensus:AnsAna_Chloephaga_rubidiceps_D2104051194.COL1a2_Anas.consensus:AnsAna_Cygnus_atratus_GCA_013377495.2.COL1a2_Anas.consensus:AnsAna_Plectropterus_gambensis_B10K-D-WWT-22.COL1a2_Anas.consensus:AnsAna_Aythya_affinis_CL200153793_L02.COL1a2_Anas.consensus:AnsAna_Somateria_spectabilis_D2006016067.COL1a2_Anas.consensus:AnsAna_Dendrocygna_guttata_B…	DB Search
AADFGPGP(+15.99)MGL	91.99	1047.47	11	0.5	524.742	2	39.4116	27214	20201209_Lumos_Ritcher_sample148_17.raw	372000	2	2	Proline Oxidation	P8:Proline Oxidation:26.31	AnsAna_Spatula_platalea_D2007020414.COL1a2_Anas.consensus:AnsAna_Chloephaga_rubidiceps_D2104051194.COL1a2_Anas.consensus:AnsAna_Cygnus_atratus_GCA_013377495.2.COL1a2_Anas.consensus:AnsAna_Plectropterus_gambensis_B10K-D-WWT-22.COL1a2_Anas.consensus:AnsAna_Aythya_affinis_CL200153793_L02.COL1a2_Anas.consensus:AnsAna_Somateria_spectabilis_D2006016067.COL1a2_Anas.consensus:AnsAna_Dendrocygna_guttata_B…	DB Search
AADFGPGP(+15.99)MGLMGP(+15.99)R	93.31	1504.68	15	0.1	502.567	3	31.7165	19232	20201209_Lumos_Ritcher_sample148_17.raw	3900000	2	2	Proline Oxidation;Proline Oxidation	P8:Proline Oxidation:33.18;P14:Proline Oxidation:33.68	AnsAna_Spatula_platalea_D2007020414.COL1a2_Anas.consensus:AnsAna_Chloephaga_rubidiceps_D2104051194.COL1a2_Anas.consensus:AnsAna_Cygnus_atratus_GCA_013377495.2.COL1a2_Anas.consensus:AnsAna_Plectropterus_gambensis_B10K-D-WWT-22.COL1a2_Anas.consensus:AnsAna_Aythya_affinis_CL200153793_L02.COL1a2_Anas.consensus:AnsAna_Somateria_spectabilis_D2006016067.COL1a2_Anas.consensus:AnsAna_Dendrocygna_guttata_B…	DB Search
AAGLP(+15.99)GVAGAP(+15.99)GLP(+15.99)GPR	73.71	1504.8	17	-0.3	502.607	3	31.8622	19393	20201209_Lumos_Ritcher_sample148_17.raw		0	0	Proline Oxidation;Proline Oxidation;Proline Oxidation	P5:Proline Oxidation:47.72;P11:Proline Oxidation:22.07;P14:Proline Oxidation:14.04	AnsAna_Spatula_platalea_D2007020414.COL1a2_Anas.consensus:AnsAna_Chloephaga_rubidiceps_D2104051194.COL1a2_Anas.consensus:AnsAna_Cygnus_atratus_GCA_013377495.2.COL1a2_Anas.consensus:AnsAna_Plectropterus_gambensis_B10K-D-WWT-22.COL1a2_Anas.consensus:AnsAna_Aythya_affinis_CL200153793_L02.COL1a2_Anas.consensus:AnsAna_Somateria_spectabilis_D2006016067.COL1a2_Anas.consensus:AnsAna_Dendrocygna_guttata_B…	DB Search
AAGPP(+15.99)GPTGPAGPP(+15.99)GFP(+15.99)GAAGAK	94.15	1946.95	23	-0.5	974.481	2	27.9767	15620	20201209_Lumos_Ritcher_sample148_17.raw	479000	1	1	Proline Oxidation;Proline Oxidation;Proline Oxidation	P5:Proline Oxidation:14.02;P14:Proline Oxidation:14.02;P17:Proline Oxidation:19.86	AnsAna_Anas_undulata_B10K-D-IZW-61.COL1a1_Cyg-Gall.consensus:AnsAna_Aythya_americana_D2006016050.COL1a1_Cyg-Gall.consensus:AnsAna_Cereopsis_novaehollandiae_B10K-D-IZW-75.COL1a1_Cyg-Gall.consensus:AnsAna_Branta_leucopsis_DBGNRM65.COL1a1_Cyg-Gall.consensus:AnsAna_Aythya_marila_GCA_029042245.1.COL1a1_Cyg-Gall.consensus:AnsAna_Tadorna_tadorna_DBGNRM58.COL1a1_Cyg-Gall.consensus:AnsAna_Anser_cygnoides_…	DB Search
ADFGPGP(+15.99)MGLMGP(+15.99)R	67.07	1433.64	14	0.5	717.829	2	31.5207	18965	20201209_Lumos_Ritcher_sample148_17.raw	1760000	1	1	Proline Oxidation;Proline Oxidation	P7:Proline Oxidation:25.66;P13:Proline Oxidation:28.60	AnsAna_Spatula_platalea_D2007020414.COL1a2_Anas.consensus:AnsAna_Chloephaga_rubidiceps_D2104051194.COL1a2_Anas.consensus:AnsAna_Cygnus_atratus_GCA_013377495.2.COL1a2_Anas.consensus:AnsAna_Plectropterus_gambensis_B10K-D-WWT-22.COL1a2_Anas.consensus:AnsAna_Aythya_affinis_CL200153793_L02.COL1a2_Anas.consensus:AnsAna_Somateria_spectabilis_D2006016067.COL1a2_Anas.consensus:AnsAna_Dendrocygna_guttata_B…	DB Search
ADGPIGAP(+15.99)GTP(+15.99)GPQGIAGQ(+0.98)R	83.81	1848.9	20	-0.4	617.306	3	28.1135	15590	20201209_Lumos_Ritcher_sample148_17.raw	207000	1	1	Proline Oxidation;Proline Oxidation;Deamidation (NQ)	P8:Proline Oxidation:19.86;P11:Proline Oxidation:39.76;Q19:Deamidation (NQ):30.64	AnsAna_Neochen_jubata_B10K-D-WWT-20.COL1a1_Cyg-Gall.consensus:AnsAna_Cereopsis_novaehollandiae_B10K-D-IZW-75.COL1a1_Cyg-Gall.consensus:AnsAna_Mareca_penelope_GCA_036026335.1.COL1a1_Cyg-Gall.consensus:AnsAna_Spatula_rhynchotis_GCA_034783165.1.COL1a1_Cyg-Gall.consensus:AnsAna_Aythya_marila_GCA_029042245.1.COL1a1_Cyg-Gall.consensus:AnsAna_Anser_cygnoides_GCA_025388735.1.COL1a1_Cyg-Gall.consensus:Ans…	DB Search
ADGPIGAP(+15.99)GTP(+15.99)GPQGIAGQR	90.21	1847.91	20	-1.4	616.977	3	27.3015	14710	20201209_Lumos_Ritcher_sample148_17.raw		0	0	Proline Oxidation;Proline Oxidation	P8:Proline Oxidation:28.70;P11:Proline Oxidation:30.83	AnsAna_Neochen_jubata_B10K-D-WWT-20.COL1a1_Cyg-Gall.consensus:AnsAna_Cereopsis_novaehollandiae_B10K-D-IZW-75.COL1a1_Cyg-Gall.consensus:AnsAna_Mareca_penelope_GCA_036026335.1.COL1a1_Cyg-Gall.consensus:AnsAna_Spatula_rhynchotis_GCA_034783165.1.COL1a1_Cyg-Gall.consensus:AnsAna_Aythya_marila_GCA_029042245.1.COL1a1_Cyg-Gall.consensus:AnsAna_Anser_cygnoides_GCA_025388735.1.COL1a1_Cyg-Gall.consensus:Ans…	DB Search
ADGPIGAP(+15.99)GTPGP(+15.99)QGIAGQR	81.69	1847.91	20	-0.2	924.963	2	27.2228	14631	20201209_Lumos_Ritcher_sample148_17.raw	169000	1	1	Proline Oxidation;Proline Oxidation	P8:Proline Oxidation:49.37;P13:Proline Oxidation:0.00	AnsAna_Neochen_jubata_B10K-D-WWT-20.COL1a1_Cyg-Gall.consensus:AnsAna_Cereopsis_novaehollandiae_B10K-D-IZW-75.COL1a1_Cyg-Gall.consensus:AnsAna_Mareca_penelope_GCA_036026335.1.COL1a1_Cyg-Gall.consensus:AnsAna_Spatula_rhynchotis_GCA_034783165.1.COL1a1_Cyg-Gall.consensus:AnsAna_Aythya_marila_GCA_029042245.1.COL1a1_Cyg-Gall.consensus:AnsAna_Anser_cygnoides_GCA_025388735.1.COL1a1_Cyg-Gall.consensus:Ans…	DB Search
AGAKGDAGPPGPAGPTGAP(+15.99)GPAGAVGAP(+15.99)GP(+15.99)K	42.89	2552.26	31	-7.2	851.755	3	22.1848	9363	20201209_Lumos_Ritcher_sample148_17.raw		0	0	Proline Oxidation;Proline Oxidation;Proline Oxidation	P19:Proline Oxidation:32.28;P28:Proline Oxidation:20.80;P30:Proline Oxidation:17.44	AnsAna_Anas_undulata_B10K-D-IZW-61.COL1a1_Cyg-Gall.consensus:AnsAna_Cereopsis_novaehollandiae_B10K-D-IZW-75.COL1a1_Cyg-Gall.consensus:AnsAna_Aythya_marila_GCA_029042245.1.COL1a1_Cyg-Gall.consensus:AnsAna_Tadorna_tadorna_DBGNRM58.COL1a1_Cyg-Gall.consensus:AnsAna_Anser_cygnoides_GCA_025388735.1.COL1a1_Cyg-Gall.consensus:AnsAna_Branta_hutchinsii_GCA_032270845.1.COL1a1_Cyg-Gall.consensus:AnsAna_Spatu…	DB Search
AGLP(+15.99)GVAGAP(+15.99)GLP(+15.99)GPR	80.49	1433.76	16	-0.3	717.888	2	31.8283	19054	20201209_Lumos_Ritcher_sample148_17.raw	1400000	1	1	Proline Oxidation;Proline Oxidation;Proline Oxidation	P4:Proline Oxidation:47.28;P10:Proline Oxidation:18.93;P13:Proline Oxidation:12.81	AnsAna_Spatula_platalea_D2007020414.COL1a2_Anas.consensus:AnsAna_Chloephaga_rubidiceps_D2104051194.COL1a2_Anas.consensus:AnsAna_Cygnus_atratus_GCA_013377495.2.COL1a2_Anas.consensus:AnsAna_Plectropterus_gambensis_B10K-D-WWT-22.COL1a2_Anas.consensus:AnsAna_Aythya_affinis_CL200153793_L02.COL1a2_Anas.consensus:AnsAna_Somateria_spectabilis_D2006016067.COL1a2_Anas.consensus:AnsAna_Dendrocygna_guttata_B…	DB Search
AGPP(+15.99)GATGFP(+15.99)GAAGR	89.05	1314.63	15	0.2	658.323	2	23.1132	10381	20201209_Lumos_Ritcher_sample148_17.raw		0	0	Proline Oxidation;Proline Oxidation	P4:Proline Oxidation:33.98;P10:Proline Oxidation:133.07	AnsAna_Anas_undulata_B10K-D-IZW-61.COL1a1_Cyg-Gall.consensus:AnsAna_Cereopsis_novaehollandiae_B10K-D-IZW-75.COL1a1_Cyg-Gall.consensus:AnsAna_Aythya_marila_GCA_029042245.1.COL1a1_Cyg-Gall.consensus:AnsAna_Tadorna_tadorna_DBGNRM58.COL1a1_Cyg-Gall.consensus:AnsAna_Anser_cygnoides_GCA_025388735.1.COL1a1_Cyg-Gall.consensus:AnsAna_Branta_hutchinsii_GCA_032270845.1.COL1a1_Cyg-Gall.consensus:AnsAna_Spatu…	DB Search
AGPP(+15.99)GPAGPTGAP(+15.99)GPAGAVGAP(+15.99)GPK	93.43	2053.02	25	0.7	685.349	3	23.5481	10835	20201209_Lumos_Ritcher_sample148_17.raw		0	0	Proline Oxidation;Proline Oxidation;Proline Oxidation	P4:Proline Oxidation:0.00;P13:Proline Oxidation:25.70;P22:Proline Oxidation:0.00	AnsAna_Anas_undulata_B10K-D-IZW-61.COL1a1_Cyg-Gall.consensus:AnsAna_Cereopsis_novaehollandiae_B10K-D-IZW-75.COL1a1_Cyg-Gall.consensus:AnsAna_Aythya_marila_GCA_029042245.1.COL1a1_Cyg-Gall.consensus:AnsAna_Tadorna_tadorna_DBGNRM58.COL1a1_Cyg-Gall.consensus:AnsAna_Anser_cygnoides_GCA_025388735.1.COL1a1_Cyg-Gall.consensus:AnsAna_Branta_hutchinsii_GCA_032270845.1.COL1a1_Cyg-Gall.consensus:AnsAna_Spatu…	DB Search
AGPTGPAGPIGAAGPP(+15.99)GFPGAP(+15.99)GAK	63	2101.06	25	1.1	701.361	3	35.6661	23320	20201209_Lumos_Ritcher_sample148_17.raw	55800	1	1	Proline Oxidation;Proline Oxidation	P16:Proline Oxidation:17.01;P22:Proline Oxidation:12.33	AnsAna_Spatula_platalea_D2007020414.COL1a2_Anas.consensus:AnsAna_Chloephaga_rubidiceps_D2104051194.COL1a2_Anas.consensus:AnsAna_Cygnus_atratus_GCA_013377495.2.COL1a2_Anas.consensus:AnsAna_Plectropterus_gambensis_B10K-D-WWT-22.COL1a2_Anas.consensus:AnsAna_Aythya_affinis_CL200153793_L02.COL1a2_Anas.consensus:AnsAna_Somateria_spectabilis_D2006016067.COL1a2_Anas.consensus:AnsAna_Dendrocygna_guttata_B…	DB Search
AGRVGP(+15.99)PGPSGNIGLP(+15.99)GPP(+15.99)GPSGK	58.99	2170.11	24	0.9	724.379	3	27.8279	15127	20201209_Lumos_Ritcher_sample148_17.raw	568000	1	1	Proline Oxidation;Proline Oxidation;Proline Oxidation	P6:Proline Oxidation:14.02;P16:Proline Oxidation:14.04;P19:Proline Oxidation:9.40	AnsAna_Cereopsis_novaehollandiae_B10K-D-IZW-75.COL1a1_Cyg-Gall.consensus:AnsAna_Aythya_marila_GCA_029042245.1.COL1a1_Cyg-Gall.consensus:AnsAna_Tadorna_tadorna_DBGNRM58.COL1a1_Cyg-Gall.consensus:AnsAna_Anser_cygnoides_GCA_025388735.1.COL1a1_Cyg-Gall.consensus:AnsAna_Branta_hutchinsii_GCA_032270845.1.COL1a1_Cyg-Gall.consensus:AnsAna_Spatula_querquedula_GCA_032191525.1.COL1a1_Cyg-Gall.consensus:AnsA…	DB Search
AIGAP(+15.99)GPAGGAGDRGEGGPAGPAGPAGAR	74.53	2384.16	29	0.7	795.727	3	21.9466	9279	20201209_Lumos_Ritcher_sample148_17.raw	589000	1	1	Proline Oxidation	P5:Proline Oxidation:26.31	AnsAna_Spatula_platalea_D2007020414.COL1a2_Anas.consensus:AnsAna_Chloephaga_rubidiceps_D2104051194.COL1a2_Anas.consensus:AnsAna_Cygnus_atratus_GCA_013377495.2.COL1a2_Anas.consensus:AnsAna_Aythya_affinis_CL200153793_L02.COL1a2_Anas.consensus:AnsAna_Somateria_spectabilis_D2006016067.COL1a2_Anas.consensus:AnsAna_Dendrocygna_guttata_B10K-D-IZW-85.COL1a2_Anas.consensus:AnsAna_Dendrocygna_arborea_B10K-…	DB Search
AIGPIGASGPP(+15.99)GPAGAAGPAGPR	91.98	1911	23	-0.5	638.006	3	31.8283	19514	20201209_Lumos_Ritcher_sample148_17.raw	1410000	2	2	Proline Oxidation	P11:Proline Oxidation:27.96	AnsAna_Lophodytes_cucullatus_B10K-D-WWT-15.COL1a2_Anas.consensus:AnsAna_Spatula_platalea_D2007020414.COL1a2_Anas.consensus:AnsAna_Spatula_smithii_GCA_035221675.1.COL1a2_Anas.consensus:AnsAna_Anas_gibberifrons_D2007020344.COL1a2_Anas.consensus:AnsAna_Aythya_baeri_GCA_026413565.1.COL1a2_Anas.consensus:AnsAna_Cyanochen_cyanoptera_B10K-D-WWT-10.COL1a2_Anas.consensus:AnsAna_Plectropterus_gambensis_B10…	DB Search
ALLLQ(+0.98)GAN(+0.98)EIEIR	93.98	1440.78	13	0.4	721.399	2	44.8027	33010	20201209_Lumos_Ritcher_sample148_17.raw	108000	2	2	Deamidation (NQ);Deamidation (NQ)	Q5:Deamidation (NQ):1000.00;N8:Deamidation (NQ):1000.00	AnsAna_Anas_undulata_B10K-D-IZW-61.COL1a1_Cyg-Gall.consensus:AnsAna_Aythya_americana_D2006016050.COL1a1_Cyg-Gall.consensus:AnsAna_Pteronetta_hartlaubii_D2102046034.COL1a1_Cyg-Gall.consensus:AnsAna_Cereopsis_novaehollandiae_B10K-D-IZW-75.COL1a1_Cyg-Gall.consensus:AnsAna_Branta_leucopsis_DBGNRM65.COL1a1_Cyg-Gall.consensus:AnsAna_Aythya_marila_GCA_029042245.1.COL1a1_Cyg-Gall.consensus:AnsAna_Tadorna…	DB Search
ALLLQGAN(+0.98)EIEIR	92.08	1439.8	13	0.1	720.906	2	44.2118	32415	20201209_Lumos_Ritcher_sample148_17.raw		0	0	Deamidation (NQ)	N8:Deamidation (NQ):38.16	AnsAna_Anas_undulata_B10K-D-IZW-61.COL1a1_Cyg-Gall.consensus:AnsAna_Aythya_americana_D2006016050.COL1a1_Cyg-Gall.consensus:AnsAna_Pteronetta_hartlaubii_D2102046034.COL1a1_Cyg-Gall.consensus:AnsAna_Cereopsis_novaehollandiae_B10K-D-IZW-75.COL1a1_Cyg-Gall.consensus:AnsAna_Branta_leucopsis_DBGNRM65.COL1a1_Cyg-Gall.consensus:AnsAna_Aythya_marila_GCA_029042245.1.COL1a1_Cyg-Gall.consensus:AnsAna_Tadorna…	DB Search
AP(+15.99)GIAGAP(+15.99)GFP(+15.99)GAR	90.17	1285.64	14	-0.8	643.828	2	27.5536	14940	20201209_Lumos_Ritcher_sample148_17.raw	263000	1	1	Proline Oxidation;Proline Oxidation;Proline Oxidation	P2:Proline Oxidation:1000.00;P8:Proline Oxidation:1000.00;P11:Proline Oxidation:1000.00	AnsAna_Anas_undulata_B10K-D-IZW-61.COL1a1_Cyg-Gall.consensus:AnsAna_Aythya_americana_D2006016050.COL1a1_Cyg-Gall.consensus:AnsAna_Cereopsis_novaehollandiae_B10K-D-IZW-75.COL1a1_Cyg-Gall.consensus:AnsAna_Branta_leucopsis_DBGNRM65.COL1a1_Cyg-Gall.consensus:AnsAna_Aythya_marila_GCA_029042245.1.COL1a1_Cyg-Gall.consensus:AnsAna_Tadorna_tadorna_DBGNRM58.COL1a1_Cyg-Gall.consensus:AnsAna_Anser_cygnoides_…	DB Search
APGAP(+15.99)GP(+15.99)VGPAGKNGDRGETGPAGPAGP(+15.99)PGPAGAR	47.62	3062.49	35	-7	766.625	4	19.0945	6327	20201209_Lumos_Ritcher_sample148_17.raw		0	0	Proline Oxidation;Proline Oxidation;Proline Oxidation	P5:Proline Oxidation:0.00;P7:Proline Oxidation:0.00;P28:Proline Oxidation:0.00	AnsAna_Aythya_americana_D2006016050.COL1a1_Cyg-Gall.consensus:AnsAna_Pteronetta_hartlaubii_D2102046034.COL1a1_Cyg-Gall.consensus:AnsAna_Cereopsis_novaehollandiae_B10K-D-IZW-75.COL1a1_Cyg-Gall.consensus:AnsAna_Branta_leucopsis_DBGNRM65.COL1a1_Cyg-Gall.consensus:AnsAna_Aythya_marila_GCA_029042245.1.COL1a1_Cyg-Gall.consensus:AnsAna_Anser_cygnoides_GCA_025388735.1.COL1a1_Cyg-Gall.consensus:AnsAna_Bra…	DB Search
ATGAP(+15.99)GIAGAP(+15.99)GFP(+15.99)GAR	85.8	1514.75	17	0.1	758.381	2	28.3093	15657	20201209_Lumos_Ritcher_sample148_17.raw	1900000	1	1	Proline Oxidation;Proline Oxidation;Proline Oxidation	P5:Proline Oxidation:1000.00;P11:Proline Oxidation:1000.00;P14:Proline Oxidation:1000.00	AnsAna_Anas_undulata_B10K-D-IZW-61.COL1a1_Cyg-Gall.consensus:AnsAna_Aythya_americana_D2006016050.COL1a1_Cyg-Gall.consensus:AnsAna_Cereopsis_novaehollandiae_B10K-D-IZW-75.COL1a1_Cyg-Gall.consensus:AnsAna_Branta_leucopsis_DBGNRM65.COL1a1_Cyg-Gall.consensus:AnsAna_Aythya_marila_GCA_029042245.1.COL1a1_Cyg-Gall.consensus:AnsAna_Tadorna_tadorna_DBGNRM58.COL1a1_Cyg-Gall.consensus:AnsAna_Anser_cygnoides_…	DB Search
ATGEP(+15.99)GPLGVSGPP(+15.99)GAR	91.5	1550.77	17	0.1	776.392	2	26.2161	13559	20201209_Lumos_Ritcher_sample148_17.raw		0	0	Proline Oxidation;Proline Oxidation	P5:Proline Oxidation:9.16;P14:Proline Oxidation:8.14	AnsAna_Spatula_platalea_D2007020414.COL1a2_Anas.consensus:AnsAna_Chloephaga_rubidiceps_D2104051194.COL1a2_Anas.consensus:AnsAna_Cygnus_atratus_GCA_013377495.2.COL1a2_Anas.consensus:AnsAna_Plectropterus_gambensis_B10K-D-WWT-22.COL1a2_Anas.consensus:AnsAna_Aythya_affinis_CL200153793_L02.COL1a2_Anas.consensus:AnsAna_Somateria_spectabilis_D2006016067.COL1a2_Anas.consensus:AnsAna_Dendrocygna_guttata_B…	DB Search
AVFVDLEPTVIDEVR	52.84	1700.9	15	-0.1	851.456	2	48.4197	36558	20201209_Lumos_Ritcher_sample148_17.raw	4110	1	1			sp|P02552|TBA1A_CHICK	DB Search
AVGAAGKDGEAGAQ(+0.98)GPPGPTGPAGER	56.43	2275.08	26	-1	759.367	3	20.6769	7830	20201209_Lumos_Ritcher_sample148_17.raw		0	0	Deamidation (NQ)	Q14:Deamidation (NQ):1000.00	AnsAna_Anas_undulata_B10K-D-IZW-61.COL1a1_Cyg-Gall.consensus:AnsAna_Aythya_americana_D2006016050.COL1a1_Cyg-Gall.consensus:AnsAna_Cereopsis_novaehollandiae_B10K-D-IZW-75.COL1a1_Cyg-Gall.consensus:AnsAna_Branta_leucopsis_DBGNRM65.COL1a1_Cyg-Gall.consensus:AnsAna_Aythya_marila_GCA_029042245.1.COL1a1_Cyg-Gall.consensus:AnsAna_Tadorna_tadorna_DBGNRM58.COL1a1_Cyg-Gall.consensus:AnsAna_Anser_cygnoides_…	DB Search
DAGHP(+15.99)GPAGPTGAP(+15.99)GPAGAVGAP(+15.99)GPK	84.08	2208.06	26	2.6	1105.04	2	24.6375	11999	20201209_Lumos_Ritcher_sample148_17.raw		0	0	Proline Oxidation;Proline Oxidation;Proline Oxidation	P5:Proline Oxidation:26.31;P14:Proline Oxidation:14.04;P23:Proline Oxidation:8.22	AnsAna_Spatula_discors_GCA_032165275.1.COL1a1_Cyg-Gall.consensus	DB Search
DAIAQ(+0.98)FEASAVGK	71	1306.64	13	-0.1	654.327	2	43.0187	31029	20201209_Lumos_Ritcher_sample148_17.raw	193000	2	2	Deamidation (NQ)	Q5:Deamidation (NQ):1000.00	sp|O42296|APOA1_ANAPL	DB Search
DAIAQFEASAVGK	69.15	1305.66	13	-0.1	653.835	2	41.1021	29042	20201209_Lumos_Ritcher_sample148_17.raw	78300	1	1			sp|O42296|APOA1_ANAPL	DB Search
DFGPGP(+15.99)MGLMGP(+15.99)R	64.21	1362.61	13	0	682.31	2	31.8645	19253	20201209_Lumos_Ritcher_sample148_17.raw	4060000	2	2	Proline Oxidation;Proline Oxidation	P6:Proline Oxidation:39.76;P12:Proline Oxidation:38.35	AnsAna_Spatula_platalea_D2007020414.COL1a2_Anas.consensus:AnsAna_Chloephaga_rubidiceps_D2104051194.COL1a2_Anas.consensus:AnsAna_Cygnus_atratus_GCA_013377495.2.COL1a2_Anas.consensus:AnsAna_Plectropterus_gambensis_B10K-D-WWT-22.COL1a2_Anas.consensus:AnsAna_Aythya_affinis_CL200153793_L02.COL1a2_Anas.consensus:AnsAna_Somateria_spectabilis_D2006016067.COL1a2_Anas.consensus:AnsAna_Dendrocygna_guttata_B…	DB Search
DGAP(+15.99)GFK	68.36	706.329	7	0.1	354.172	2	14.7574	3483	20201209_Lumos_Ritcher_sample148_17.raw	294000	1	1	Proline Oxidation	P4:Proline Oxidation:1000.00	AnsAna_Spatula_platalea_D2007020414.COL1a2_Anas.consensus:AnsAna_Chloephaga_rubidiceps_D2104051194.COL1a2_Anas.consensus:AnsAna_Cygnus_atratus_GCA_013377495.2.COL1a2_Anas.consensus:AnsAna_Plectropterus_gambensis_B10K-D-WWT-22.COL1a2_Anas.consensus:AnsAna_Aythya_affinis_CL200153793_L02.COL1a2_Anas.consensus:AnsAna_Somateria_spectabilis_D2006016067.COL1a2_Anas.consensus:AnsAna_Dendrocygna_guttata_B…	DB Search
DGEAGAQ(+0.98)GPP(+15.99)GPTGPAGER	93.04	1736.76	19	1.1	869.388	2	19.312	6559	20201209_Lumos_Ritcher_sample148_17.raw	41400	1	1	Deamidation (NQ);Proline Oxidation	Q7:Deamidation (NQ):1000.00;P10:Proline Oxidation:17.01	AnsAna_Anas_undulata_B10K-D-IZW-61.COL1a1_Cyg-Gall.consensus:AnsAna_Aythya_americana_D2006016050.COL1a1_Cyg-Gall.consensus:AnsAna_Cereopsis_novaehollandiae_B10K-D-IZW-75.COL1a1_Cyg-Gall.consensus:AnsAna_Branta_leucopsis_DBGNRM65.COL1a1_Cyg-Gall.consensus:AnsAna_Aythya_marila_GCA_029042245.1.COL1a1_Cyg-Gall.consensus:AnsAna_Tadorna_tadorna_DBGNRM58.COL1a1_Cyg-Gall.consensus:AnsAna_Anser_cygnoides_…	DB Search
DGEAGAQ(+0.98)GPPGPTGPAGER	93.13	1720.77	19	-1	861.389	2	20.9928	8236	20201209_Lumos_Ritcher_sample148_17.raw	7760000	4	4	Deamidation (NQ)	Q7:Deamidation (NQ):1000.00	AnsAna_Anas_undulata_B10K-D-IZW-61.COL1a1_Cyg-Gall.consensus:AnsAna_Aythya_americana_D2006016050.COL1a1_Cyg-Gall.consensus:AnsAna_Cereopsis_novaehollandiae_B10K-D-IZW-75.COL1a1_Cyg-Gall.consensus:AnsAna_Branta_leucopsis_DBGNRM65.COL1a1_Cyg-Gall.consensus:AnsAna_Aythya_marila_GCA_029042245.1.COL1a1_Cyg-Gall.consensus:AnsAna_Tadorna_tadorna_DBGNRM58.COL1a1_Cyg-Gall.consensus:AnsAna_Anser_cygnoides_…	DB Search
DGEAGAQGPPGP(+15.99)TGPAGER	41.17	1735.78	19	-0.5	868.895	2	18.5021	5730	20201209_Lumos_Ritcher_sample148_17.raw	166000	1	1	Proline Oxidation	P12:Proline Oxidation:0.00	AnsAna_Anas_undulata_B10K-D-IZW-61.COL1a1_Cyg-Gall.consensus:AnsAna_Aythya_americana_D2006016050.COL1a1_Cyg-Gall.consensus:AnsAna_Cereopsis_novaehollandiae_B10K-D-IZW-75.COL1a1_Cyg-Gall.consensus:AnsAna_Branta_leucopsis_DBGNRM65.COL1a1_Cyg-Gall.consensus:AnsAna_Aythya_marila_GCA_029042245.1.COL1a1_Cyg-Gall.consensus:AnsAna_Tadorna_tadorna_DBGNRM58.COL1a1_Cyg-Gall.consensus:AnsAna_Anser_cygnoides_…	DB Search
DGEAGAQGPPGPTGPAGER	93.46	1719.78	19	-3.1	860.895	2	19.9768	7238	20201209_Lumos_Ritcher_sample148_17.raw		0	0			AnsAna_Anas_undulata_B10K-D-IZW-61.COL1a1_Cyg-Gall.consensus:AnsAna_Aythya_americana_D2006016050.COL1a1_Cyg-Gall.consensus:AnsAna_Cereopsis_novaehollandiae_B10K-D-IZW-75.COL1a1_Cyg-Gall.consensus:AnsAna_Branta_leucopsis_DBGNRM65.COL1a1_Cyg-Gall.consensus:AnsAna_Aythya_marila_GCA_029042245.1.COL1a1_Cyg-Gall.consensus:AnsAna_Tadorna_tadorna_DBGNRM58.COL1a1_Cyg-Gall.consensus:AnsAna_Anser_cygnoides_…	DB Search
DGEAGAQGPPGPTGPAGERGEQ(+0.98)GP(+15.99)AGAP(+15.99)G	46.85	2574.12	29	0.1	859.048	3	22.1346	9339	20201209_Lumos_Ritcher_sample148_17.raw	152000	1	1	Deamidation (NQ);Proline Oxidation;Proline Oxidation	Q22:Deamidation (NQ):16.63;P24:Proline Oxidation:9.32;P28:Proline Oxidation:21.87	AnsAna_Anas_undulata_B10K-D-IZW-61.COL1a1_Cyg-Gall.consensus:AnsAna_Aythya_americana_D2006016050.COL1a1_Cyg-Gall.consensus:AnsAna_Cereopsis_novaehollandiae_B10K-D-IZW-75.COL1a1_Cyg-Gall.consensus:AnsAna_Branta_leucopsis_DBGNRM65.COL1a1_Cyg-Gall.consensus:AnsAna_Aythya_marila_GCA_029042245.1.COL1a1_Cyg-Gall.consensus:AnsAna_Tadorna_tadorna_DBGNRM58.COL1a1_Cyg-Gall.consensus:AnsAna_Anser_cygnoides_…	DB Search
DGLN(+0.98)GLP(+15.99)GPIGPP(+15.99)GPR	83.66	1545.78	16	0	773.897	2	34.9542	22535	20201209_Lumos_Ritcher_sample148_17.raw	1580000	1	1	Deamidation (NQ);Proline Oxidation;Proline Oxidation	N4:Deamidation (NQ):1000.00;P7:Proline Oxidation:18.70;P13:Proline Oxidation:0.00	AnsAna_Anas_undulata_B10K-D-IZW-61.COL1a1_Cyg-Gall.consensus:AnsAna_Aythya_americana_D2006016050.COL1a1_Cyg-Gall.consensus:AnsAna_Pteronetta_hartlaubii_D2102046034.COL1a1_Cyg-Gall.consensus:AnsAna_Cereopsis_novaehollandiae_B10K-D-IZW-75.COL1a1_Cyg-Gall.consensus:AnsAna_Branta_leucopsis_DBGNRM65.COL1a1_Cyg-Gall.consensus:AnsAna_Aythya_marila_GCA_029042245.1.COL1a1_Cyg-Gall.consensus:AnsAna_Tadorna…	DB Search
DGLN(+0.98)GLPGPIGP(+15.99)P(+15.99)GPR	86.37	1545.78	16	-0.1	773.897	2	38.4489	26021	20201209_Lumos_Ritcher_sample148_17.raw	1000000	1	1	Deamidation (NQ);Proline Oxidation;Proline Oxidation	N4:Deamidation (NQ):1000.00;P12:Proline Oxidation:0.00;P13:Proline Oxidation:0.00	AnsAna_Anas_undulata_B10K-D-IZW-61.COL1a1_Cyg-Gall.consensus:AnsAna_Aythya_americana_D2006016050.COL1a1_Cyg-Gall.consensus:AnsAna_Pteronetta_hartlaubii_D2102046034.COL1a1_Cyg-Gall.consensus:AnsAna_Cereopsis_novaehollandiae_B10K-D-IZW-75.COL1a1_Cyg-Gall.consensus:AnsAna_Branta_leucopsis_DBGNRM65.COL1a1_Cyg-Gall.consensus:AnsAna_Aythya_marila_GCA_029042245.1.COL1a1_Cyg-Gall.consensus:AnsAna_Tadorna…	DB Search
DGLN(+0.98)GLPGPIGP(+15.99)PGP(+15.99)R	90.09	1545.78	16	-0.1	773.897	2	38.4489	26349	20201209_Lumos_Ritcher_sample148_17.raw	1000000	1	1	Deamidation (NQ);Proline Oxidation;Proline Oxidation	N4:Deamidation (NQ):1000.00;P12:Proline Oxidation:0.00;P15:Proline Oxidation:8.22	AnsAna_Anas_undulata_B10K-D-IZW-61.COL1a1_Cyg-Gall.consensus:AnsAna_Aythya_americana_D2006016050.COL1a1_Cyg-Gall.consensus:AnsAna_Pteronetta_hartlaubii_D2102046034.COL1a1_Cyg-Gall.consensus:AnsAna_Cereopsis_novaehollandiae_B10K-D-IZW-75.COL1a1_Cyg-Gall.consensus:AnsAna_Branta_leucopsis_DBGNRM65.COL1a1_Cyg-Gall.consensus:AnsAna_Aythya_marila_GCA_029042245.1.COL1a1_Cyg-Gall.consensus:AnsAna_Tadorna…	DB Search
DGLNGLP(+15.99)GPIGP(+15.99)P(+15.99)GPR	92.83	1560.79	16	-0.9	521.27	3	34.1473	21635	20201209_Lumos_Ritcher_sample148_17.raw	205000000	3	3	Proline Oxidation;Proline Oxidation;Proline Oxidation	P7:Proline Oxidation:45.01;P12:Proline Oxidation:11.12;P13:Proline Oxidation:5.47	AnsAna_Anas_undulata_B10K-D-IZW-61.COL1a1_Cyg-Gall.consensus:AnsAna_Aythya_americana_D2006016050.COL1a1_Cyg-Gall.consensus:AnsAna_Pteronetta_hartlaubii_D2102046034.COL1a1_Cyg-Gall.consensus:AnsAna_Cereopsis_novaehollandiae_B10K-D-IZW-75.COL1a1_Cyg-Gall.consensus:AnsAna_Branta_leucopsis_DBGNRM65.COL1a1_Cyg-Gall.consensus:AnsAna_Aythya_marila_GCA_029042245.1.COL1a1_Cyg-Gall.consensus:AnsAna_Tadorna…	DB Search
DGLNGLP(+15.99)GPIGP(+15.99)PGPR	88.42	1544.79	16	-0.9	773.404	2	34.6569	22068	20201209_Lumos_Ritcher_sample148_17.raw	990000	1	1	Proline Oxidation;Proline Oxidation	P7:Proline Oxidation:14.63;P12:Proline Oxidation:0.00	AnsAna_Anas_undulata_B10K-D-IZW-61.COL1a1_Cyg-Gall.consensus:AnsAna_Aythya_americana_D2006016050.COL1a1_Cyg-Gall.consensus:AnsAna_Pteronetta_hartlaubii_D2102046034.COL1a1_Cyg-Gall.consensus:AnsAna_Cereopsis_novaehollandiae_B10K-D-IZW-75.COL1a1_Cyg-Gall.consensus:AnsAna_Branta_leucopsis_DBGNRM65.COL1a1_Cyg-Gall.consensus:AnsAna_Aythya_marila_GCA_029042245.1.COL1a1_Cyg-Gall.consensus:AnsAna_Tadorna…	DB Search
DGLNGLPGPIGP(+15.99)P(+15.99)GPR	73.24	1544.79	16	-0.5	773.404	2	36.3825	24287	20201209_Lumos_Ritcher_sample148_17.raw	659000	1	1	Proline Oxidation;Proline Oxidation	P12:Proline Oxidation:0.00;P13:Proline Oxidation:0.00	AnsAna_Anas_undulata_B10K-D-IZW-61.COL1a1_Cyg-Gall.consensus:AnsAna_Aythya_americana_D2006016050.COL1a1_Cyg-Gall.consensus:AnsAna_Pteronetta_hartlaubii_D2102046034.COL1a1_Cyg-Gall.consensus:AnsAna_Cereopsis_novaehollandiae_B10K-D-IZW-75.COL1a1_Cyg-Gall.consensus:AnsAna_Branta_leucopsis_DBGNRM65.COL1a1_Cyg-Gall.consensus:AnsAna_Aythya_marila_GCA_029042245.1.COL1a1_Cyg-Gall.consensus:AnsAna_Tadorna…	DB Search
DGLNGLPGPIGP(+15.99)PGP(+15.99)R	78.54	1544.79	16	-0.5	773.404	2	36.3825	23892	20201209_Lumos_Ritcher_sample148_17.raw	659000	1	1	Proline Oxidation;Proline Oxidation	P12:Proline Oxidation:0.00;P15:Proline Oxidation:0.00	AnsAna_Anas_undulata_B10K-D-IZW-61.COL1a1_Cyg-Gall.consensus:AnsAna_Aythya_americana_D2006016050.COL1a1_Cyg-Gall.consensus:AnsAna_Pteronetta_hartlaubii_D2102046034.COL1a1_Cyg-Gall.consensus:AnsAna_Cereopsis_novaehollandiae_B10K-D-IZW-75.COL1a1_Cyg-Gall.consensus:AnsAna_Branta_leucopsis_DBGNRM65.COL1a1_Cyg-Gall.consensus:AnsAna_Aythya_marila_GCA_029042245.1.COL1a1_Cyg-Gall.consensus:AnsAna_Tadorna…	DB Search
DGN(sub L)RGLTGPIGPP(+15.99)GPAGAP(+15.99)GDKGEAGPP(+15.99)GPAGPTGAR	41.87	3320.61	37	6.8	831.166	4	36.0997	23760	20201209_Lumos_Ritcher_sample148_17.raw		0	0	Leu->Asn substitution;Proline Oxidation;Proline Oxidation;Proline Oxidation	P13:Proline Oxidation:17.01;P19:Proline Oxidation:25.70;P28:Proline Oxidation:17.01	AnsAna_Spatula_discors_GCA_032165275.1.COL1a1_Cyg-Gall.consensus:AnsAna_Mareca_sibilatrix_GCA_034783215.1.COL1a1_Cyg-Gall.consensus:AnsAna_Cereopsis_novaehollandiae_B10K-D-IZW-75.COL1a1_Cyg-Gall.consensus:AnsAna_Tachyeres_brachypterus_GCA_032357605.1.COL1a1_Cyg-Gall.consensus:AnsAna_Branta_leucopsis_DBGNRM65.COL1a1_Cyg-Gall.consensus:AnsAna_Aythya_marila_GCA_029042245.1.COL1a1_Cyg-Gall.consensus:…	SPIDER
DGNPGN(+0.98)DGP(+15.99)PGR	54.91	1168.47	12	-0.2	585.244	2	8.9534	2079	20201209_Lumos_Ritcher_sample148_17.raw	4710	1	1	Deamidation (NQ);Proline Oxidation	N6:Deamidation (NQ):9.42;P9:Proline Oxidation:0.00	AnsAna_Spatula_platalea_D2007020414.COL1a2_Anas.consensus:AnsAna_Chloephaga_rubidiceps_D2104051194.COL1a2_Anas.consensus:AnsAna_Cygnus_atratus_GCA_013377495.2.COL1a2_Anas.consensus:AnsAna_Plectropterus_gambensis_B10K-D-WWT-22.COL1a2_Anas.consensus:AnsAna_Aythya_affinis_CL200153793_L02.COL1a2_Anas.consensus:AnsAna_Somateria_spectabilis_D2006016067.COL1a2_Anas.consensus:AnsAna_Dendrocygna_guttata_B…	DB Search
DGRN(+0.98)GLP(+15.99)GPIGPAGAR	92.86	1520.77	16	0.7	507.931	3	25.3639	12512	20201209_Lumos_Ritcher_sample148_17.raw	31400000	3	3	Deamidation (NQ);Proline Oxidation	N4:Deamidation (NQ):1000.00;P7:Proline Oxidation:30.83	AnsAna_Spatula_platalea_D2007020414.COL1a2_Anas.consensus:AnsAna_Chloephaga_rubidiceps_D2104051194.COL1a2_Anas.consensus:AnsAna_Cygnus_atratus_GCA_013377495.2.COL1a2_Anas.consensus:AnsAna_Plectropterus_gambensis_B10K-D-WWT-22.COL1a2_Anas.consensus:AnsAna_Aythya_affinis_CL200153793_L02.COL1a2_Anas.consensus:AnsAna_Somateria_spectabilis_D2006016067.COL1a2_Anas.consensus:AnsAna_Dendrocygna_guttata_B…	DB Search
DLPPDTTLLDLQ(+0.98)N(+0.98)N(+0.98)KITEIK	88.66	2283.17	20	2	762.067	3	48.8058	37025	20201209_Lumos_Ritcher_sample148_17.raw	71600	2	2	Deamidation (NQ);Deamidation (NQ);Deamidation (NQ)	Q12:Deamidation (NQ):1000.00;N13:Deamidation (NQ):1000.00;N14:Deamidation (NQ):1000.00	sp|P28675|PGS2_CHICK	DB Search
DRGETGPAGPP(+15.99)GAP(+15.99)GAPGAP(+15.99)GPVGPAGK	88.77	2439.18	28	5.6	814.071	3	22.0203	9199	20201209_Lumos_Ritcher_sample148_17.raw		0	0	Proline Oxidation;Proline Oxidation;Proline Oxidation	P11:Proline Oxidation:0.00;P14:Proline Oxidation:28.36;P20:Proline Oxidation:12.33	AnsAna_Anas_undulata_B10K-D-IZW-61.COL1a1_Cyg-Gall.consensus:AnsAna_Aythya_americana_D2006016050.COL1a1_Cyg-Gall.consensus:AnsAna_Pteronetta_hartlaubii_D2102046034.COL1a1_Cyg-Gall.consensus:AnsAna_Cereopsis_novaehollandiae_B10K-D-IZW-75.COL1a1_Cyg-Gall.consensus:AnsAna_Branta_leucopsis_DBGNRM65.COL1a1_Cyg-Gall.consensus:AnsAna_Aythya_marila_GCA_029042245.1.COL1a1_Cyg-Gall.consensus:AnsAna_Tadorna…	DB Search
DVGP(+15.99)VGRTGEQGIAGPP(+15.99)GFAGEK	88.83	2227.09	23	-5.3	743.366	3	31.1801	18440	20201209_Lumos_Ritcher_sample148_17.raw	4460000	1	1	Proline Oxidation;Proline Oxidation	P4:Proline Oxidation:61.14;P17:Proline Oxidation:12.28	AnsAna_Spatula_platalea_D2007020414.COL1a2_Anas.consensus:AnsAna_Chloephaga_rubidiceps_D2104051194.COL1a2_Anas.consensus:AnsAna_Cygnus_atratus_GCA_013377495.2.COL1a2_Anas.consensus:AnsAna_Plectropterus_gambensis_B10K-D-WWT-22.COL1a2_Anas.consensus:AnsAna_Aythya_affinis_CL200153793_L02.COL1a2_Anas.consensus:AnsAna_Somateria_spectabilis_D2006016067.COL1a2_Anas.consensus:AnsAna_Dendrocygna_guttata_B…	DB Search
EFGVP(+15.99)GPAGPR	73.73	1098.55	11	0.7	550.281	2	28.1263	15425	20201209_Lumos_Ritcher_sample148_17.raw	649000	1	1	Proline Oxidation	P5:Proline Oxidation:18.53	AnsAna_Spatula_platalea_D2007020414.COL1a2_Anas.consensus:AnsAna_Chloephaga_rubidiceps_D2104051194.COL1a2_Anas.consensus:AnsAna_Cygnus_atratus_GCA_013377495.2.COL1a2_Anas.consensus:AnsAna_Plectropterus_gambensis_B10K-D-WWT-22.COL1a2_Anas.consensus:AnsAna_Aythya_affinis_CL200153793_L02.COL1a2_Anas.consensus:AnsAna_Somateria_spectabilis_D2006016067.COL1a2_Anas.consensus:AnsAna_Dendrocygna_guttata_B…	DB Search
EGAP(+15.99)GAEGAP(+15.99)GR	53.46	1099.49	12	0.5	550.752	2	8.7843	1930	20201209_Lumos_Ritcher_sample148_17.raw	816000	2	2	Proline Oxidation;Proline Oxidation	P4:Proline Oxidation:1000.00;P10:Proline Oxidation:1000.00	AnsAna_Anas_undulata_B10K-D-IZW-61.COL1a1_Cyg-Gall.consensus:AnsAna_Aythya_americana_D2006016050.COL1a1_Cyg-Gall.consensus:AnsAna_Pteronetta_hartlaubii_D2102046034.COL1a1_Cyg-Gall.consensus:AnsAna_Cereopsis_novaehollandiae_B10K-D-IZW-75.COL1a1_Cyg-Gall.consensus:AnsAna_Branta_leucopsis_DBGNRM65.COL1a1_Cyg-Gall.consensus:AnsAna_Aythya_marila_GCA_029042245.1.COL1a1_Cyg-Gall.consensus:AnsAna_Tadorna…	DB Search
EGPVGFP(+15.99)GADGR	94.71	1173.54	12	-0.7	587.778	2	27.3143	14747	20201209_Lumos_Ritcher_sample148_17.raw	137000000	2	2	Proline Oxidation	P7:Proline Oxidation:83.66	AnsAna_Spatula_platalea_D2007020414.COL1a2_Anas.consensus:AnsAna_Chloephaga_rubidiceps_D2104051194.COL1a2_Anas.consensus:AnsAna_Cygnus_atratus_GCA_013377495.2.COL1a2_Anas.consensus:AnsAna_Plectropterus_gambensis_B10K-D-WWT-22.COL1a2_Anas.consensus:AnsAna_Aythya_affinis_CL200153793_L02.COL1a2_Anas.consensus:AnsAna_Somateria_spectabilis_D2006016067.COL1a2_Anas.consensus:AnsAna_Dendrocygna_guttata_B…	DB Search
ELHLN(+0.98)N(+0.98)N(+0.98)ELVR	72.49	1352.66	11	0.2	451.893	3	33.2766	20953	20201209_Lumos_Ritcher_sample148_17.raw	25600	1	1	Deamidation (NQ);Deamidation (NQ);Deamidation (NQ)	N5:Deamidation (NQ):1000.00;N6:Deamidation (NQ):1000.00;N7:Deamidation (NQ):1000.00	sp|Q9DE68|PGS2_COTJA:sp|P28675|PGS2_CHICK	DB Search
EPGAAGPP(+15.99)GPP(+15.99)GPSGEEGKR	91.48	1874.88	20	-5.6	938.44	2	19.2773	6522	20201209_Lumos_Ritcher_sample148_17.raw		0	0	Proline Oxidation;Proline Oxidation	P8:Proline Oxidation:17.01;P11:Proline Oxidation:11.10	AnsAna_Spatula_platalea_D2007020414.COL1a2_Anas.consensus:AnsAna_Chloephaga_rubidiceps_D2104051194.COL1a2_Anas.consensus:AnsAna_Cygnus_atratus_GCA_013377495.2.COL1a2_Anas.consensus:AnsAna_Plectropterus_gambensis_B10K-D-WWT-22.COL1a2_Anas.consensus:AnsAna_Aythya_affinis_CL200153793_L02.COL1a2_Anas.consensus:AnsAna_Somateria_spectabilis_D2006016067.COL1a2_Anas.consensus:AnsAna_Dendrocygna_guttata_B…	DB Search
ERGLP(+15.99)GISGATGEP(+15.99)GPLGVSGP(+15.99)PGAR	59.46	2433.22	26	6.6	812.088	3	33.8533	21454	20201209_Lumos_Ritcher_sample148_17.raw		0	0	Proline Oxidation;Proline Oxidation;Proline Oxidation	P5:Proline Oxidation:28.83;P14:Proline Oxidation:0.00;P22:Proline Oxidation:0.00	AnsAna_Spatula_platalea_D2007020414.COL1a2_Anas.consensus:AnsAna_Chloephaga_rubidiceps_D2104051194.COL1a2_Anas.consensus:AnsAna_Cygnus_atratus_GCA_013377495.2.COL1a2_Anas.consensus:AnsAna_Plectropterus_gambensis_B10K-D-WWT-22.COL1a2_Anas.consensus:AnsAna_Aythya_affinis_CL200153793_L02.COL1a2_Anas.consensus:AnsAna_Somateria_spectabilis_D2006016067.COL1a2_Anas.consensus:AnsAna_Dendrocygna_guttata_B…	DB Search
ETGPTGAIGP(+15.99)IGASGPP(+15.99)GPAGAAGPAGPR	89.86	2469.22	29	2.7	824.084	3	33.3545	20972	20201209_Lumos_Ritcher_sample148_17.raw		0	0	Proline Oxidation;Proline Oxidation	P10:Proline Oxidation:0.00;P17:Proline Oxidation:9.40	AnsAna_Lophodytes_cucullatus_B10K-D-WWT-15.COL1a2_Anas.consensus:AnsAna_Spatula_platalea_D2007020414.COL1a2_Anas.consensus:AnsAna_Spatula_smithii_GCA_035221675.1.COL1a2_Anas.consensus:AnsAna_Anas_gibberifrons_D2007020344.COL1a2_Anas.consensus:AnsAna_Aythya_baeri_GCA_026413565.1.COL1a2_Anas.consensus:AnsAna_Cyanochen_cyanoptera_B10K-D-WWT-10.COL1a2_Anas.consensus:AnsAna_Plectropterus_gambensis_B10…	DB Search
ETGPTGAIGPIGASGPP(+15.99)GPAGAAGPAGPR	91.25	2453.23	29	0	818.751	3	33.8684	21468	20201209_Lumos_Ritcher_sample148_17.raw		0	0	Proline Oxidation	P17:Proline Oxidation:14.04	AnsAna_Lophodytes_cucullatus_B10K-D-WWT-15.COL1a2_Anas.consensus:AnsAna_Spatula_platalea_D2007020414.COL1a2_Anas.consensus:AnsAna_Spatula_smithii_GCA_035221675.1.COL1a2_Anas.consensus:AnsAna_Anas_gibberifrons_D2007020344.COL1a2_Anas.consensus:AnsAna_Aythya_baeri_GCA_026413565.1.COL1a2_Anas.consensus:AnsAna_Cyanochen_cyanoptera_B10K-D-WWT-10.COL1a2_Anas.consensus:AnsAna_Plectropterus_gambensis_B10…	DB Search
FDLVPVPK	42.76	913.527	8	-0.6	457.771	2	40.359	28242	20201209_Lumos_Ritcher_sample148_17.raw	12600	1	1			sp|O93510|GELS_CHICK	DB Search
FGVP(+15.99)GPAGPR	83	969.503	10	0.8	485.759	2	25.3831	12560	20201209_Lumos_Ritcher_sample148_17.raw	1390000	1	1	Proline Oxidation	P4:Proline Oxidation:32.28	AnsAna_Spatula_platalea_D2007020414.COL1a2_Anas.consensus:AnsAna_Chloephaga_rubidiceps_D2104051194.COL1a2_Anas.consensus:AnsAna_Cygnus_atratus_GCA_013377495.2.COL1a2_Anas.consensus:AnsAna_Plectropterus_gambensis_B10K-D-WWT-22.COL1a2_Anas.consensus:AnsAna_Aythya_affinis_CL200153793_L02.COL1a2_Anas.consensus:AnsAna_Somateria_spectabilis_D2006016067.COL1a2_Anas.consensus:AnsAna_Dendrocygna_guttata_B…	DB Search
FISLLDELQ(+0.98)K	51.55	1205.65	10	-1	603.834	2	49.3288	37545	20201209_Lumos_Ritcher_sample148_17.raw		0	0	Deamidation (NQ)	Q9:Deamidation (NQ):1000.00	sp|O42296|APOA1_ANAPL	DB Search
FP(+15.99)GADGIAGPK	91.02	1044.52	11	0.5	523.27	2	25.7979	13078	20201209_Lumos_Ritcher_sample148_17.raw	130000	1	1	Proline Oxidation	P2:Proline Oxidation:63.70	AnsAna_Anas_undulata_B10K-D-IZW-61.COL1a1_Cyg-Gall.consensus:AnsAna_Aythya_americana_D2006016050.COL1a1_Cyg-Gall.consensus:AnsAna_Cereopsis_novaehollandiae_B10K-D-IZW-75.COL1a1_Cyg-Gall.consensus:AnsAna_Branta_leucopsis_DBGNRM65.COL1a1_Cyg-Gall.consensus:AnsAna_Aythya_marila_GCA_029042245.1.COL1a1_Cyg-Gall.consensus:AnsAna_Tadorna_tadorna_DBGNRM58.COL1a1_Cyg-Gall.consensus:AnsAna_Anser_cygnoides_…	DB Search
FQ(+0.98)GLP(+15.99)GPSGPAGEAGKP(+15.99)GER	93.68	1940.92	20	-1.7	647.98	3	26.9984	14403	20201209_Lumos_Ritcher_sample148_17.raw	342000	2	2	Deamidation (NQ);Proline Oxidation;Proline Oxidation	Q2:Deamidation (NQ):1000.00;P5:Proline Oxidation:22.85;P17:Proline Oxidation:37.50	AnsAna_Spatula_platalea_D2007020414.COL1a2_Anas.consensus:AnsAna_Chloephaga_rubidiceps_D2104051194.COL1a2_Anas.consensus:AnsAna_Cygnus_atratus_GCA_013377495.2.COL1a2_Anas.consensus:AnsAna_Plectropterus_gambensis_B10K-D-WWT-22.COL1a2_Anas.consensus:AnsAna_Aythya_affinis_CL200153793_L02.COL1a2_Anas.consensus:AnsAna_Somateria_spectabilis_D2006016067.COL1a2_Anas.consensus:AnsAna_Dendrocygna_guttata_B…	DB Search
FQGLP(+15.99)GPSGPAGEAGKP(+15.99)GER	84.22	1939.94	20	-0.5	647.653	3	25.5993	12992	20201209_Lumos_Ritcher_sample148_17.raw	250000	1	1	Proline Oxidation;Proline Oxidation	P5:Proline Oxidation:26.31;P17:Proline Oxidation:8.82	AnsAna_Spatula_platalea_D2007020414.COL1a2_Anas.consensus:AnsAna_Chloephaga_rubidiceps_D2104051194.COL1a2_Anas.consensus:AnsAna_Cygnus_atratus_GCA_013377495.2.COL1a2_Anas.consensus:AnsAna_Plectropterus_gambensis_B10K-D-WWT-22.COL1a2_Anas.consensus:AnsAna_Aythya_affinis_CL200153793_L02.COL1a2_Anas.consensus:AnsAna_Somateria_spectabilis_D2006016067.COL1a2_Anas.consensus:AnsAna_Dendrocygna_guttata_B…	DB Search
FQGPPGEP(+15.99)GEP(+15.99)GASGP(+15.99)MGPR	46.41	1968.86	20	0	657.295	3	23.7416	11050	20201209_Lumos_Ritcher_sample148_17.raw		0	0	Proline Oxidation;Proline Oxidation;Proline Oxidation	P8:Proline Oxidation:6.63;P11:Proline Oxidation:19.69;P16:Proline Oxidation:0.00	AnsAna_Anas_undulata_B10K-D-IZW-61.COL1a1_Cyg-Gall.consensus:AnsAna_Aythya_americana_D2006016050.COL1a1_Cyg-Gall.consensus:AnsAna_Aythya_marila_GCA_029042245.1.COL1a1_Cyg-Gall.consensus:AnsAna_Anser_cygnoides_GCA_025388735.1.COL1a1_Cyg-Gall.consensus:AnsAna_Branta_hutchinsii_GCA_032270845.1.COL1a1_Cyg-Gall.consensus:AnsAna_Spatula_querquedula_GCA_032191525.1.COL1a1_Cyg-Gall.consensus:AnsAna_Aix_g…	DB Search
FSGLQ(+0.98)GPP(+15.99)GPPGSP(+15.99)GEQGPSGASGPAGPR	90.89	2632.22	29	0.2	878.413	3	30.5232	17947	20201209_Lumos_Ritcher_sample148_17.raw	1900000	1	1	Deamidation (NQ);Proline Oxidation;Proline Oxidation	Q5:Deamidation (NQ):72.00;P8:Proline Oxidation:0.00;P14:Proline Oxidation:11.27	AnsAna_Aix_sponsa_GCA_032270905.1.COL1a1_Cyg-Gall.consensus	DB Search
FSGLQ(+0.98)GPPGPPGSP(+15.99)GEQ(+0.98)GPSGASGPAGPR	71.14	2617.2	29	2.6	873.411	3	31.442	18928	20201209_Lumos_Ritcher_sample148_17.raw	65800	1	1	Deamidation (NQ);Proline Oxidation;Deamidation (NQ)	Q5:Deamidation (NQ):1000.00;P14:Proline Oxidation:3.46;Q17:Deamidation (NQ):1000.00	AnsAna_Aix_sponsa_GCA_032270905.1.COL1a1_Cyg-Gall.consensus	DB Search
FSGLQGP(+15.99)PGPPGSP(+15.99)GEQ(+0.98)GPSGASGPAGPR	84.6	2632.22	29	0.2	878.413	3	30.5232	18024	20201209_Lumos_Ritcher_sample148_17.raw	1900000	1	1	Proline Oxidation;Proline Oxidation;Deamidation (NQ)	P7:Proline Oxidation:0.00;P14:Proline Oxidation:5.77;Q17:Deamidation (NQ):0.00	AnsAna_Aix_sponsa_GCA_032270905.1.COL1a1_Cyg-Gall.consensus	DB Search
FSGLQGP(+15.99)PGPPGSP(+15.99)GEQGPSGASGPAGPR	91.69	2631.23	29	-1.1	878.083	3	29.7093	17093	20201209_Lumos_Ritcher_sample148_17.raw		0	0	Proline Oxidation;Proline Oxidation	P7:Proline Oxidation:0.00;P14:Proline Oxidation:25.70	AnsAna_Aix_sponsa_GCA_032270905.1.COL1a1_Cyg-Gall.consensus	DB Search
FSGLQGPP(+15.99)GPPGAP(+15.99)GEQGPSGASGPAGPR	91.52	2615.24	29	-1.1	872.752	3	30.9855	18434	20201209_Lumos_Ritcher_sample148_17.raw	537000	1	1	Proline Oxidation;Proline Oxidation	P8:Proline Oxidation:8.69;P14:Proline Oxidation:28.36	AnsAna_Anas_undulata_B10K-D-IZW-61.COL1a1_Cyg-Gall.consensus:AnsAna_Aythya_americana_D2006016050.COL1a1_Cyg-Gall.consensus:AnsAna_Pteronetta_hartlaubii_D2102046034.COL1a1_Cyg-Gall.consensus:AnsAna_Cereopsis_novaehollandiae_B10K-D-IZW-75.COL1a1_Cyg-Gall.consensus:AnsAna_Branta_leucopsis_DBGNRM65.COL1a1_Cyg-Gall.consensus:AnsAna_Aythya_marila_GCA_029042245.1.COL1a1_Cyg-Gall.consensus:AnsAna_Tadorna…	DB Search
FSGLQGPP(+15.99)GPPGSP(+15.99)GEQ(+0.98)GPSGASGPAGPR	91.73	2632.22	29	-1.3	878.411	3	30.31	17719	20201209_Lumos_Ritcher_sample148_17.raw	2970000	2	2	Proline Oxidation;Proline Oxidation;Deamidation (NQ)	P8:Proline Oxidation:0.00;P14:Proline Oxidation:22.37;Q17:Deamidation (NQ):42.22	AnsAna_Aix_sponsa_GCA_032270905.1.COL1a1_Cyg-Gall.consensus	DB Search
FSGLQGPPGP(+15.99)PGSP(+15.99)GEQGPSGASGPAGPR	74.95	2631.23	29	-9.6	878.076	3	31.4113	18896	20201209_Lumos_Ritcher_sample148_17.raw		0	0	Proline Oxidation;Proline Oxidation	P10:Proline Oxidation:5.08;P14:Proline Oxidation:0.00	AnsAna_Aix_sponsa_GCA_032270905.1.COL1a1_Cyg-Gall.consensus	DB Search
FSGLQGPPGP(+15.99)PGSPGEQGPSGASGPAGPR	41.51	2615.24	29	-1.8	872.751	3	31.94	19477	20201209_Lumos_Ritcher_sample148_17.raw		0	0	Proline Oxidation	P10:Proline Oxidation:8.69	AnsAna_Aix_sponsa_GCA_032270905.1.COL1a1_Cyg-Gall.consensus	DB Search
FSGLQGPPGPPGSP(+15.99)GEQ(+0.98)GPSGASGPAGPR	97.59	2616.22	29	4.6	873.085	3	30.869	18298	20201209_Lumos_Ritcher_sample148_17.raw	732000	1	1	Proline Oxidation;Deamidation (NQ)	P14:Proline Oxidation:5.06;Q17:Deamidation (NQ):17.53	AnsAna_Aix_sponsa_GCA_032270905.1.COL1a1_Cyg-Gall.consensus	DB Search
GAAGLP(+15.99)GVAGAP(+15.99)GLP(+15.99)GPR	93.7	1561.82	18	0.6	521.615	3	31.6208	19126	20201209_Lumos_Ritcher_sample148_17.raw	254000000	2	2	Proline Oxidation;Proline Oxidation;Proline Oxidation	P6:Proline Oxidation:132.72;P12:Proline Oxidation:29.96;P15:Proline Oxidation:5.03	AnsAna_Spatula_platalea_D2007020414.COL1a2_Anas.consensus:AnsAna_Chloephaga_rubidiceps_D2104051194.COL1a2_Anas.consensus:AnsAna_Cygnus_atratus_GCA_013377495.2.COL1a2_Anas.consensus:AnsAna_Plectropterus_gambensis_B10K-D-WWT-22.COL1a2_Anas.consensus:AnsAna_Aythya_affinis_CL200153793_L02.COL1a2_Anas.consensus:AnsAna_Somateria_spectabilis_D2006016067.COL1a2_Anas.consensus:AnsAna_Dendrocygna_guttata_B…	DB Search
GAAGP(+15.99)PGFPGAPGAKGEIGPAGN(+0.98)VGPTGPAGPR	60.03	2852.42	33	-1.4	951.813	3	36.9286	24590	20201209_Lumos_Ritcher_sample148_17.raw	125000	1	1	Proline Oxidation;Deamidation (NQ)	P5:Proline Oxidation:0.00;N23:Deamidation (NQ):1000.00	AnsAna_Spatula_platalea_D2007020414.COL1a2_Anas.consensus:AnsAna_Chloephaga_rubidiceps_D2104051194.COL1a2_Anas.consensus:AnsAna_Plectropterus_gambensis_B10K-D-WWT-22.COL1a2_Anas.consensus:AnsAna_Aythya_affinis_CL200153793_L02.COL1a2_Anas.consensus:AnsAna_Somateria_spectabilis_D2006016067.COL1a2_Anas.consensus:AnsAna_Neochen_jubata_B10K-D-WWT-20.COL1a2_Anas.consensus:AnsAna_Anas_fulvigula_D2005012…	DB Search
GAAGPP(+15.99)GPTGPAGPP(+15.99)GFP(+15.99)GAAGAK	94.02	2003.97	24	0.3	1002.99	2	28.0762	15364	20201209_Lumos_Ritcher_sample148_17.raw	1490000	2	2	Proline Oxidation;Proline Oxidation;Proline Oxidation	P6:Proline Oxidation:26.02;P15:Proline Oxidation:8.69;P18:Proline Oxidation:18.33	AnsAna_Anas_undulata_B10K-D-IZW-61.COL1a1_Cyg-Gall.consensus:AnsAna_Aythya_americana_D2006016050.COL1a1_Cyg-Gall.consensus:AnsAna_Cereopsis_novaehollandiae_B10K-D-IZW-75.COL1a1_Cyg-Gall.consensus:AnsAna_Branta_leucopsis_DBGNRM65.COL1a1_Cyg-Gall.consensus:AnsAna_Aythya_marila_GCA_029042245.1.COL1a1_Cyg-Gall.consensus:AnsAna_Tadorna_tadorna_DBGNRM58.COL1a1_Cyg-Gall.consensus:AnsAna_Anser_cygnoides_…	DB Search
GAAGPPGP(+15.99)TGPAGPP(+15.99)GFP(+15.99)GAAGAK	90.6	2003.97	24	0.5	668.998	3	28.0265	15393	20201209_Lumos_Ritcher_sample148_17.raw	913000	1	1	Proline Oxidation;Proline Oxidation;Proline Oxidation	P8:Proline Oxidation:0.00;P15:Proline Oxidation:8.69;P18:Proline Oxidation:28.70	AnsAna_Anas_undulata_B10K-D-IZW-61.COL1a1_Cyg-Gall.consensus:AnsAna_Aythya_americana_D2006016050.COL1a1_Cyg-Gall.consensus:AnsAna_Cereopsis_novaehollandiae_B10K-D-IZW-75.COL1a1_Cyg-Gall.consensus:AnsAna_Branta_leucopsis_DBGNRM65.COL1a1_Cyg-Gall.consensus:AnsAna_Aythya_marila_GCA_029042245.1.COL1a1_Cyg-Gall.consensus:AnsAna_Tadorna_tadorna_DBGNRM58.COL1a1_Cyg-Gall.consensus:AnsAna_Anser_cygnoides_…	DB Search
GADGPIGAP(+15.99)GTP(+15.99)GPQ(+0.98)GIAGQR	47.25	1905.92	21	8	636.318	3	27.1599	14557	20201209_Lumos_Ritcher_sample148_17.raw		0	0	Proline Oxidation;Proline Oxidation;Deamidation (NQ)	P9:Proline Oxidation:9.30;P12:Proline Oxidation:5.47;Q15:Deamidation (NQ):23.57	AnsAna_Neochen_jubata_B10K-D-WWT-20.COL1a1_Cyg-Gall.consensus:AnsAna_Cereopsis_novaehollandiae_B10K-D-IZW-75.COL1a1_Cyg-Gall.consensus:AnsAna_Mareca_penelope_GCA_036026335.1.COL1a1_Cyg-Gall.consensus:AnsAna_Spatula_rhynchotis_GCA_034783165.1.COL1a1_Cyg-Gall.consensus:AnsAna_Aythya_marila_GCA_029042245.1.COL1a1_Cyg-Gall.consensus:AnsAna_Anser_cygnoides_GCA_025388735.1.COL1a1_Cyg-Gall.consensus:Ans…	DB Search
GADGPIGAP(+15.99)GTP(+15.99)GPQGIAGQ(+0.98)R	87.75	1905.92	21	0.4	636.314	3	27.8279	15580	20201209_Lumos_Ritcher_sample148_17.raw	404000	1	1	Proline Oxidation;Proline Oxidation;Deamidation (NQ)	P9:Proline Oxidation:6.29;P12:Proline Oxidation:0.00;Q20:Deamidation (NQ):26.93	AnsAna_Neochen_jubata_B10K-D-WWT-20.COL1a1_Cyg-Gall.consensus:AnsAna_Cereopsis_novaehollandiae_B10K-D-IZW-75.COL1a1_Cyg-Gall.consensus:AnsAna_Mareca_penelope_GCA_036026335.1.COL1a1_Cyg-Gall.consensus:AnsAna_Spatula_rhynchotis_GCA_034783165.1.COL1a1_Cyg-Gall.consensus:AnsAna_Aythya_marila_GCA_029042245.1.COL1a1_Cyg-Gall.consensus:AnsAna_Anser_cygnoides_GCA_025388735.1.COL1a1_Cyg-Gall.consensus:Ans…	DB Search
GAIGPIGASGPP(+15.99)GPAGAAGPAGPR	91.99	1968.02	24	-0.9	985.015	2	31.9456	19608	20201209_Lumos_Ritcher_sample148_17.raw	1220000	1	1	Proline Oxidation	P12:Proline Oxidation:5.03	AnsAna_Lophodytes_cucullatus_B10K-D-WWT-15.COL1a2_Anas.consensus:AnsAna_Spatula_platalea_D2007020414.COL1a2_Anas.consensus:AnsAna_Spatula_smithii_GCA_035221675.1.COL1a2_Anas.consensus:AnsAna_Anas_gibberifrons_D2007020344.COL1a2_Anas.consensus:AnsAna_Aythya_baeri_GCA_026413565.1.COL1a2_Anas.consensus:AnsAna_Cyanochen_cyanoptera_B10K-D-WWT-10.COL1a2_Anas.consensus:AnsAna_Plectropterus_gambensis_B10…	DB Search
GAN(+0.98)GAP(+15.99)GNDGAK	91.13	1044.45	12	0.1	523.231	2	8.7364	1828	20201209_Lumos_Ritcher_sample148_17.raw	11600	1	1	Deamidation (NQ);Proline Oxidation	N3:Deamidation (NQ):76.17;P6:Proline Oxidation:1000.00	AnsAna_Anas_undulata_B10K-D-IZW-61.COL1a1_Cyg-Gall.consensus:AnsAna_Aythya_americana_D2006016050.COL1a1_Cyg-Gall.consensus:AnsAna_Cereopsis_novaehollandiae_B10K-D-IZW-75.COL1a1_Cyg-Gall.consensus:AnsAna_Branta_leucopsis_DBGNRM65.COL1a1_Cyg-Gall.consensus:AnsAna_Aythya_marila_GCA_029042245.1.COL1a1_Cyg-Gall.consensus:AnsAna_Tadorna_tadorna_DBGNRM58.COL1a1_Cyg-Gall.consensus:AnsAna_Anser_cygnoides_…	DB Search
GANGAP(+15.99)GNDGAK	94.26	1043.46	12	-0.1	522.739	2	8.7245	1828	20201209_Lumos_Ritcher_sample148_17.raw	4060	1	1	Proline Oxidation	P6:Proline Oxidation:1000.00	AnsAna_Anas_undulata_B10K-D-IZW-61.COL1a1_Cyg-Gall.consensus:AnsAna_Aythya_americana_D2006016050.COL1a1_Cyg-Gall.consensus:AnsAna_Cereopsis_novaehollandiae_B10K-D-IZW-75.COL1a1_Cyg-Gall.consensus:AnsAna_Branta_leucopsis_DBGNRM65.COL1a1_Cyg-Gall.consensus:AnsAna_Aythya_marila_GCA_029042245.1.COL1a1_Cyg-Gall.consensus:AnsAna_Tadorna_tadorna_DBGNRM58.COL1a1_Cyg-Gall.consensus:AnsAna_Anser_cygnoides_…	DB Search
GAP(+15.99)GDRGEP(+15.99)GPP(+15.99)GPAGF	98.57	1582.7	17	-0.2	792.358	2	27.6836	15109	20201209_Lumos_Ritcher_sample148_17.raw	63800	1	1	Proline Oxidation;Proline Oxidation;Proline Oxidation	P3:Proline Oxidation:81.94;P9:Proline Oxidation:55.92;P12:Proline Oxidation:24.44	AnsAna_Anas_undulata_B10K-D-IZW-61.COL1a1_Cyg-Gall.consensus:AnsAna_Aythya_americana_D2006016050.COL1a1_Cyg-Gall.consensus:AnsAna_Cereopsis_novaehollandiae_B10K-D-IZW-75.COL1a1_Cyg-Gall.consensus:AnsAna_Branta_leucopsis_DBGNRM65.COL1a1_Cyg-Gall.consensus:AnsAna_Aythya_marila_GCA_029042245.1.COL1a1_Cyg-Gall.consensus:AnsAna_Tadorna_tadorna_DBGNRM58.COL1a1_Cyg-Gall.consensus:AnsAna_Anser_cygnoides_…	DB Search
GAP(+15.99)GDRGEP(+15.99)GPP(+15.99)GPAGFA	89.99	1653.74	18	-0.8	827.876	2	27.0991	14457	20201209_Lumos_Ritcher_sample148_17.raw	203000	1	1	Proline Oxidation;Proline Oxidation;Proline Oxidation	P3:Proline Oxidation:36.81;P9:Proline Oxidation:26.31;P12:Proline Oxidation:40.00	AnsAna_Anas_undulata_B10K-D-IZW-61.COL1a1_Cyg-Gall.consensus:AnsAna_Aythya_americana_D2006016050.COL1a1_Cyg-Gall.consensus:AnsAna_Cereopsis_novaehollandiae_B10K-D-IZW-75.COL1a1_Cyg-Gall.consensus:AnsAna_Branta_leucopsis_DBGNRM65.COL1a1_Cyg-Gall.consensus:AnsAna_Aythya_marila_GCA_029042245.1.COL1a1_Cyg-Gall.consensus:AnsAna_Tadorna_tadorna_DBGNRM58.COL1a1_Cyg-Gall.consensus:AnsAna_Anser_cygnoides_…	DB Search
GAP(+15.99)GDRGEP(+15.99)GPP(+15.99)GPAGFAGPPGADGQPGAK	97.92	2686.24	30	-8	896.412	3	26.3881	13736	20201209_Lumos_Ritcher_sample148_17.raw		0	0	Proline Oxidation;Proline Oxidation;Proline Oxidation	P3:Proline Oxidation:36.20;P9:Proline Oxidation:11.10;P12:Proline Oxidation:10.11	AnsAna_Anas_undulata_B10K-D-IZW-61.COL1a1_Cyg-Gall.consensus:AnsAna_Aythya_americana_D2006016050.COL1a1_Cyg-Gall.consensus:AnsAna_Cereopsis_novaehollandiae_B10K-D-IZW-75.COL1a1_Cyg-Gall.consensus:AnsAna_Aythya_marila_GCA_029042245.1.COL1a1_Cyg-Gall.consensus:AnsAna_Tadorna_tadorna_DBGNRM58.COL1a1_Cyg-Gall.consensus:AnsAna_Anser_cygnoides_GCA_025388735.1.COL1a1_Cyg-Gall.consensus:AnsAna_Branta_hut…	DB Search
GAP(+15.99)GIAGAP(+15.99)GFP(+15.99)GAR	70.84	1342.66	15	-0.2	672.339	2	27.8775	14921	20201209_Lumos_Ritcher_sample148_17.raw	5190000	1	1	Proline Oxidation;Proline Oxidation;Proline Oxidation	P3:Proline Oxidation:1000.00;P9:Proline Oxidation:1000.00;P12:Proline Oxidation:1000.00	AnsAna_Anas_undulata_B10K-D-IZW-61.COL1a1_Cyg-Gall.consensus:AnsAna_Aythya_americana_D2006016050.COL1a1_Cyg-Gall.consensus:AnsAna_Cereopsis_novaehollandiae_B10K-D-IZW-75.COL1a1_Cyg-Gall.consensus:AnsAna_Branta_leucopsis_DBGNRM65.COL1a1_Cyg-Gall.consensus:AnsAna_Aythya_marila_GCA_029042245.1.COL1a1_Cyg-Gall.consensus:AnsAna_Tadorna_tadorna_DBGNRM58.COL1a1_Cyg-Gall.consensus:AnsAna_Anser_cygnoides_…	DB Search
GAP(+15.99)GILGLP(+15.99)GSR	88.08	1125.61	12	-0.7	563.814	2	33.568	20977	20201209_Lumos_Ritcher_sample148_17.raw	4660000	2	2	Proline Oxidation;Proline Oxidation	P3:Proline Oxidation:1000.00;P9:Proline Oxidation:1000.00	AnsAna_Spatula_platalea_D2007020414.COL1a2_Anas.consensus:AnsAna_Chloephaga_rubidiceps_D2104051194.COL1a2_Anas.consensus:AnsAna_Cygnus_atratus_GCA_013377495.2.COL1a2_Anas.consensus:AnsAna_Plectropterus_gambensis_B10K-D-WWT-22.COL1a2_Anas.consensus:AnsAna_Aythya_affinis_CL200153793_L02.COL1a2_Anas.consensus:AnsAna_Somateria_spectabilis_D2006016067.COL1a2_Anas.consensus:AnsAna_Dendrocygna_guttata_B…	DB Search
GAP(+15.99)GPAGGAGDR	51.42	997.458	12	-0.2	499.736	2	25.0917	12414	20201209_Lumos_Ritcher_sample148_17.raw		0	0	Proline Oxidation	P3:Proline Oxidation:45.01	AnsAna_Spatula_platalea_D2007020414.COL1a2_Anas.consensus:AnsAna_Chloephaga_rubidiceps_D2104051194.COL1a2_Anas.consensus:AnsAna_Cygnus_atratus_GCA_013377495.2.COL1a2_Anas.consensus:AnsAna_Plectropterus_gambensis_B10K-D-WWT-22.COL1a2_Anas.consensus:AnsAna_Aythya_affinis_CL200153793_L02.COL1a2_Anas.consensus:AnsAna_Somateria_spectabilis_D2006016067.COL1a2_Anas.consensus:AnsAna_Dendrocygna_guttata_B…	DB Search
GAP(+15.99)GPP(+15.99)GAVGAAGK	54.06	1137.58	14	0.2	569.796	2	14.2724	3423	20201209_Lumos_Ritcher_sample148_17.raw	3020000	2	2	Proline Oxidation;Proline Oxidation	P3:Proline Oxidation:45.01;P6:Proline Oxidation:17.01	AnsAna_Anas_undulata_B10K-D-IZW-61.COL1a1_Cyg-Gall.consensus:AnsAna_Aythya_americana_D2006016050.COL1a1_Cyg-Gall.consensus:AnsAna_Cereopsis_novaehollandiae_B10K-D-IZW-75.COL1a1_Cyg-Gall.consensus:AnsAna_Branta_leucopsis_DBGNRM65.COL1a1_Cyg-Gall.consensus:AnsAna_Aythya_marila_GCA_029042245.1.COL1a1_Cyg-Gall.consensus:AnsAna_Tadorna_tadorna_DBGNRM58.COL1a1_Cyg-Gall.consensus:AnsAna_Anser_cygnoides_…	DB Search
GAP(+15.99)GPP(+15.99)GAVGAAGKDGEAGAQ(+0.98)GPP(+15.99)GPTGPAGER	45.14	2856.33	33	-0.6	953.116	3	21.9508	8937	20201209_Lumos_Ritcher_sample148_17.raw	21400000	1	1	Proline Oxidation;Proline Oxidation;Deamidation (NQ);Proline Oxidation	P3:Proline Oxidation:36.05;P6:Proline Oxidation:27.96;Q21:Deamidation (NQ):1000.00;P24:Proline Oxidation:12.28	AnsAna_Spatula_discors_GCA_032165275.1.COL1a1_Cyg-Gall.consensus:AnsAna_Mareca_sibilatrix_GCA_034783215.1.COL1a1_Cyg-Gall.consensus:AnsAna_Cereopsis_novaehollandiae_B10K-D-IZW-75.COL1a1_Cyg-Gall.consensus:AnsAna_Tachyeres_brachypterus_GCA_032357605.1.COL1a1_Cyg-Gall.consensus:AnsAna_Branta_leucopsis_DBGNRM65.COL1a1_Cyg-Gall.consensus:AnsAna_Aythya_marila_GCA_029042245.1.COL1a1_Cyg-Gall.consensus:…	SPIDER
GAP(+15.99)GPP(+15.99)GAVGAAGKDGEAGAQ(+0.98)GPPGPTGPAGER	90.46	2840.33	33	-0.1	947.785	3	23.1811	10497	20201209_Lumos_Ritcher_sample148_17.raw	19900000	2	2	Proline Oxidation;Proline Oxidation;Deamidation (NQ)	P3:Proline Oxidation:43.88;P6:Proline Oxidation:30.46;Q21:Deamidation (NQ):1000.00	AnsAna_Anas_undulata_B10K-D-IZW-61.COL1a1_Cyg-Gall.consensus:AnsAna_Aythya_americana_D2006016050.COL1a1_Cyg-Gall.consensus:AnsAna_Cereopsis_novaehollandiae_B10K-D-IZW-75.COL1a1_Cyg-Gall.consensus:AnsAna_Branta_leucopsis_DBGNRM65.COL1a1_Cyg-Gall.consensus:AnsAna_Aythya_marila_GCA_029042245.1.COL1a1_Cyg-Gall.consensus:AnsAna_Tadorna_tadorna_DBGNRM58.COL1a1_Cyg-Gall.consensus:AnsAna_Anser_cygnoides_…	DB Search
GAP(+15.99)GPP(+15.99)GAVGAAGKDGEAGAQGPP(+15.99)GPTGPAGER	94.83	2855.34	33	-1.3	952.787	3	21.442	8917	20201209_Lumos_Ritcher_sample148_17.raw	8740000	1	1	Proline Oxidation;Proline Oxidation;Proline Oxidation	P3:Proline Oxidation:45.01;P6:Proline Oxidation:27.96;P24:Proline Oxidation:7.21	AnsAna_Anas_undulata_B10K-D-IZW-61.COL1a1_Cyg-Gall.consensus:AnsAna_Aythya_americana_D2006016050.COL1a1_Cyg-Gall.consensus:AnsAna_Cereopsis_novaehollandiae_B10K-D-IZW-75.COL1a1_Cyg-Gall.consensus:AnsAna_Branta_leucopsis_DBGNRM65.COL1a1_Cyg-Gall.consensus:AnsAna_Aythya_marila_GCA_029042245.1.COL1a1_Cyg-Gall.consensus:AnsAna_Tadorna_tadorna_DBGNRM58.COL1a1_Cyg-Gall.consensus:AnsAna_Anser_cygnoides_…	DB Search
GAP(+15.99)GPP(+15.99)GAVGAAGKDGEAGAQGPPGPTGPAGER	94.23	2839.35	33	0.9	710.845	4	22.4886	9575	20201209_Lumos_Ritcher_sample148_17.raw	17500000	2	2	Proline Oxidation;Proline Oxidation	P3:Proline Oxidation:36.05;P6:Proline Oxidation:10.11	AnsAna_Anas_undulata_B10K-D-IZW-61.COL1a1_Cyg-Gall.consensus:AnsAna_Aythya_americana_D2006016050.COL1a1_Cyg-Gall.consensus:AnsAna_Cereopsis_novaehollandiae_B10K-D-IZW-75.COL1a1_Cyg-Gall.consensus:AnsAna_Branta_leucopsis_DBGNRM65.COL1a1_Cyg-Gall.consensus:AnsAna_Aythya_marila_GCA_029042245.1.COL1a1_Cyg-Gall.consensus:AnsAna_Tadorna_tadorna_DBGNRM58.COL1a1_Cyg-Gall.consensus:AnsAna_Anser_cygnoides_…	DB Search
GAP(+15.99)GPPGAP(sub V)GAAGKDGEAGAQGPPGPTGPAGER	42.77	2821.34	33	2.6	941.456	3	22.7741	9896	20201209_Lumos_Ritcher_sample148_17.raw	1130000	1	1	Proline Oxidation;Val->Pro substitution	P3:Proline Oxidation:32.28	AnsAna_Spatula_discors_GCA_032165275.1.COL1a1_Cyg-Gall.consensus:AnsAna_Mareca_sibilatrix_GCA_034783215.1.COL1a1_Cyg-Gall.consensus:AnsAna_Cereopsis_novaehollandiae_B10K-D-IZW-75.COL1a1_Cyg-Gall.consensus:AnsAna_Tachyeres_brachypterus_GCA_032357605.1.COL1a1_Cyg-Gall.consensus:AnsAna_Branta_leucopsis_DBGNRM65.COL1a1_Cyg-Gall.consensus:AnsAna_Aythya_marila_GCA_029042245.1.COL1a1_Cyg-Gall.consensus:…	SPIDER
GAP(+15.99)GPPGAVGAAGK	47.96	1121.58	14	0	561.799	2	17.4813	4535	20201209_Lumos_Ritcher_sample148_17.raw	357000	1	1	Proline Oxidation	P3:Proline Oxidation:60.92	AnsAna_Anas_undulata_B10K-D-IZW-61.COL1a1_Cyg-Gall.consensus:AnsAna_Aythya_americana_D2006016050.COL1a1_Cyg-Gall.consensus:AnsAna_Cereopsis_novaehollandiae_B10K-D-IZW-75.COL1a1_Cyg-Gall.consensus:AnsAna_Branta_leucopsis_DBGNRM65.COL1a1_Cyg-Gall.consensus:AnsAna_Aythya_marila_GCA_029042245.1.COL1a1_Cyg-Gall.consensus:AnsAna_Tadorna_tadorna_DBGNRM58.COL1a1_Cyg-Gall.consensus:AnsAna_Anser_cygnoides_…	DB Search
GAP(+15.99)GPPGAVGAAGKDGEAGAQ(+0.98)GPP(+15.99)GPTGPAGER	55.01	2840.33	33	-0.2	711.09	4	23.1811	10655	20201209_Lumos_Ritcher_sample148_17.raw	2610000	1	1	Proline Oxidation;Deamidation (NQ);Proline Oxidation	P3:Proline Oxidation:0.00;Q21:Deamidation (NQ):1000.00;P24:Proline Oxidation:17.01	AnsAna_Anas_undulata_B10K-D-IZW-61.COL1a1_Cyg-Gall.consensus:AnsAna_Aythya_americana_D2006016050.COL1a1_Cyg-Gall.consensus:AnsAna_Cereopsis_novaehollandiae_B10K-D-IZW-75.COL1a1_Cyg-Gall.consensus:AnsAna_Branta_leucopsis_DBGNRM65.COL1a1_Cyg-Gall.consensus:AnsAna_Aythya_marila_GCA_029042245.1.COL1a1_Cyg-Gall.consensus:AnsAna_Tadorna_tadorna_DBGNRM58.COL1a1_Cyg-Gall.consensus:AnsAna_Anser_cygnoides_…	DB Search
GAP(+15.99)GPPGAVGAAGKDGEAGAQ(+0.98)GPPGPTGPAGER	92.32	2824.34	33	-3.2	942.45	3	24.8298	12207	20201209_Lumos_Ritcher_sample148_17.raw	1210000	1	1	Proline Oxidation;Deamidation (NQ)	P3:Proline Oxidation:26.31;Q21:Deamidation (NQ):1000.00	AnsAna_Anas_undulata_B10K-D-IZW-61.COL1a1_Cyg-Gall.consensus:AnsAna_Aythya_americana_D2006016050.COL1a1_Cyg-Gall.consensus:AnsAna_Cereopsis_novaehollandiae_B10K-D-IZW-75.COL1a1_Cyg-Gall.consensus:AnsAna_Branta_leucopsis_DBGNRM65.COL1a1_Cyg-Gall.consensus:AnsAna_Aythya_marila_GCA_029042245.1.COL1a1_Cyg-Gall.consensus:AnsAna_Tadorna_tadorna_DBGNRM58.COL1a1_Cyg-Gall.consensus:AnsAna_Anser_cygnoides_…	DB Search
GAP(+15.99)GPPGAVGAAGKDGEAGAQGPPGPTGPAGER	92.59	2823.35	33	-0.9	942.124	3	23.9528	11235	20201209_Lumos_Ritcher_sample148_17.raw	5760000	2	2	Proline Oxidation	P3:Proline Oxidation:36.05	AnsAna_Anas_undulata_B10K-D-IZW-61.COL1a1_Cyg-Gall.consensus:AnsAna_Aythya_americana_D2006016050.COL1a1_Cyg-Gall.consensus:AnsAna_Cereopsis_novaehollandiae_B10K-D-IZW-75.COL1a1_Cyg-Gall.consensus:AnsAna_Branta_leucopsis_DBGNRM65.COL1a1_Cyg-Gall.consensus:AnsAna_Aythya_marila_GCA_029042245.1.COL1a1_Cyg-Gall.consensus:AnsAna_Tadorna_tadorna_DBGNRM58.COL1a1_Cyg-Gall.consensus:AnsAna_Anser_cygnoides_…	DB Search
GAP(+15.99)GSP(+15.99)GPSGALGAP(+15.99)GPHGQVGPAGK	93.73	2225.08	26	0	1113.55	2	21.7317	8866	20201209_Lumos_Ritcher_sample148_17.raw	1080000	1	1	Proline Oxidation;Proline Oxidation;Proline Oxidation	P3:Proline Oxidation:53.92;P6:Proline Oxidation:32.28;P15:Proline Oxidation:26.31	AnsAna_Spatula_platalea_D2007020414.COL1a2_Anas.consensus:AnsAna_Spatula_smithii_GCA_035221675.1.COL1a2_Anas.consensus:AnsAna_Anas_gibberifrons_D2007020344.COL1a2_Anas.consensus:AnsAna_Aythya_baeri_GCA_026413565.1.COL1a2_Anas.consensus:AnsAna_Heteronetta_atricapilla_GCA_011075105.1.COL1a2_Anas.consensus:AnsAna_Amazonetta_brasiliensis_D2007020470.COL1a2_Anas.consensus:AnsAna_Stictonetta_naevosa_GC…	DB Search
GAP(+15.99)GSRGFP(+15.99)GADGIAGPK	93.82	1642.81	18	0.2	548.61	3	25.2505	12478	20201209_Lumos_Ritcher_sample148_17.raw	3130000	1	1	Proline Oxidation;Proline Oxidation	P3:Proline Oxidation:140.25;P9:Proline Oxidation:118.18	AnsAna_Anas_undulata_B10K-D-IZW-61.COL1a1_Cyg-Gall.consensus:AnsAna_Aythya_americana_D2006016050.COL1a1_Cyg-Gall.consensus:AnsAna_Cereopsis_novaehollandiae_B10K-D-IZW-75.COL1a1_Cyg-Gall.consensus:AnsAna_Branta_leucopsis_DBGNRM65.COL1a1_Cyg-Gall.consensus:AnsAna_Aythya_marila_GCA_029042245.1.COL1a1_Cyg-Gall.consensus:AnsAna_Tadorna_tadorna_DBGNRM58.COL1a1_Cyg-Gall.consensus:AnsAna_Anser_cygnoides_…	DB Search
GAPGEQGPSGASGPAGPR	65.51	1548.73	18	5.8	775.376	2	24.8768	12245	20201209_Lumos_Ritcher_sample148_17.raw		0	0			AnsAna_Anas_undulata_B10K-D-IZW-61.COL1a1_Cyg-Gall.consensus:AnsAna_Aythya_americana_D2006016050.COL1a1_Cyg-Gall.consensus:AnsAna_Pteronetta_hartlaubii_D2102046034.COL1a1_Cyg-Gall.consensus:AnsAna_Cereopsis_novaehollandiae_B10K-D-IZW-75.COL1a1_Cyg-Gall.consensus:AnsAna_Branta_leucopsis_DBGNRM65.COL1a1_Cyg-Gall.consensus:AnsAna_Aythya_marila_GCA_029042245.1.COL1a1_Cyg-Gall.consensus:AnsAna_Tadorna…	DB Search
GAPGP(+15.99)P(+15.99)GAVGAAGKDGEAGAQGPP(+15.99)GPTGPAGER	88.43	2855.34	33	-1.4	714.842	4	21.1489	8349	20201209_Lumos_Ritcher_sample148_17.raw		0	0	Proline Oxidation;Proline Oxidation;Proline Oxidation	P5:Proline Oxidation:10.42;P6:Proline Oxidation:19.16;P24:Proline Oxidation:9.34	AnsAna_Anas_undulata_B10K-D-IZW-61.COL1a1_Cyg-Gall.consensus:AnsAna_Aythya_americana_D2006016050.COL1a1_Cyg-Gall.consensus:AnsAna_Cereopsis_novaehollandiae_B10K-D-IZW-75.COL1a1_Cyg-Gall.consensus:AnsAna_Branta_leucopsis_DBGNRM65.COL1a1_Cyg-Gall.consensus:AnsAna_Aythya_marila_GCA_029042245.1.COL1a1_Cyg-Gall.consensus:AnsAna_Tadorna_tadorna_DBGNRM58.COL1a1_Cyg-Gall.consensus:AnsAna_Anser_cygnoides_…	DB Search
GAPGPPGAVGAAGKDGETGAQ(+0.98)GPP(+15.99)GPTGPAGER	44.33	2854.35	33	-0.1	714.594	4	21.2001	8405	20201209_Lumos_Ritcher_sample148_17.raw		0	0	Deamidation (NQ);Proline Oxidation	Q21:Deamidation (NQ):1000.00;P24:Proline Oxidation:17.01	AnsAna_Aix_sponsa_GCA_032270905.1.COL1a1_Cyg-Gall.consensus	DB Search
GASGPP(+15.99)GPAGAAGPAGPR	93.34	1459.72	18	0.2	730.866	2	33.931	21525	20201209_Lumos_Ritcher_sample148_17.raw		0	0	Proline Oxidation	P6:Proline Oxidation:27.96	AnsAna_Spatula_platalea_D2007020414.COL1a2_Anas.consensus:AnsAna_Chloephaga_rubidiceps_D2104051194.COL1a2_Anas.consensus:AnsAna_Cygnus_atratus_GCA_013377495.2.COL1a2_Anas.consensus:AnsAna_Plectropterus_gambensis_B10K-D-WWT-22.COL1a2_Anas.consensus:AnsAna_Aythya_affinis_CL200153793_L02.COL1a2_Anas.consensus:AnsAna_Somateria_spectabilis_D2006016067.COL1a2_Anas.consensus:AnsAna_Dendrocygna_guttata_B…	DB Search
GASGPVGAK	60.57	742.397	9	-0.9	372.206	2	8.8837	1997	20201209_Lumos_Ritcher_sample148_17.raw	77600	1	1			AnsAna_Spatula_platalea_D2007020414.COL1a2_Anas.consensus:AnsAna_Chloephaga_rubidiceps_D2104051194.COL1a2_Anas.consensus:AnsAna_Cygnus_atratus_GCA_013377495.2.COL1a2_Anas.consensus:AnsAna_Plectropterus_gambensis_B10K-D-WWT-22.COL1a2_Anas.consensus:AnsAna_Aythya_affinis_CL200153793_L02.COL1a2_Anas.consensus:AnsAna_Somateria_spectabilis_D2006016067.COL1a2_Anas.consensus:AnsAna_Dendrocygna_guttata_B…	DB Search
GATGAP(+15.99)GIAGAP(+15.99)GF	98.35	1174.56	14	-1.8	588.287	2	34.962	22591	20201209_Lumos_Ritcher_sample148_17.raw		0	0	Proline Oxidation;Proline Oxidation	P6:Proline Oxidation:1000.00;P12:Proline Oxidation:1000.00	AnsAna_Anas_undulata_B10K-D-IZW-61.COL1a1_Cyg-Gall.consensus:AnsAna_Aythya_americana_D2006016050.COL1a1_Cyg-Gall.consensus:AnsAna_Cereopsis_novaehollandiae_B10K-D-IZW-75.COL1a1_Cyg-Gall.consensus:AnsAna_Branta_leucopsis_DBGNRM65.COL1a1_Cyg-Gall.consensus:AnsAna_Aythya_marila_GCA_029042245.1.COL1a1_Cyg-Gall.consensus:AnsAna_Tadorna_tadorna_DBGNRM58.COL1a1_Cyg-Gall.consensus:AnsAna_Anser_cygnoides_…	DB Search
GATGAP(+15.99)GIAGAP(+15.99)GFP(+15.99)G	72.21	1344.63	16	-0.6	673.322	2	32.111	19600	20201209_Lumos_Ritcher_sample148_17.raw	1310000	1	1	Proline Oxidation;Proline Oxidation;Proline Oxidation	P6:Proline Oxidation:1000.00;P12:Proline Oxidation:1000.00;P15:Proline Oxidation:1000.00	AnsAna_Anas_undulata_B10K-D-IZW-61.COL1a1_Cyg-Gall.consensus:AnsAna_Aythya_americana_D2006016050.COL1a1_Cyg-Gall.consensus:AnsAna_Cereopsis_novaehollandiae_B10K-D-IZW-75.COL1a1_Cyg-Gall.consensus:AnsAna_Branta_leucopsis_DBGNRM65.COL1a1_Cyg-Gall.consensus:AnsAna_Aythya_marila_GCA_029042245.1.COL1a1_Cyg-Gall.consensus:AnsAna_Tadorna_tadorna_DBGNRM58.COL1a1_Cyg-Gall.consensus:AnsAna_Anser_cygnoides_…	DB Search
GATGAP(+15.99)GIAGAP(+15.99)GFP(+15.99)GAR	93.7	1571.77	18	0.9	524.931	3	28.4257	15999	20201209_Lumos_Ritcher_sample148_17.raw	890000000	2	2	Proline Oxidation;Proline Oxidation;Proline Oxidation	P6:Proline Oxidation:1000.00;P12:Proline Oxidation:1000.00;P15:Proline Oxidation:1000.00	AnsAna_Anas_undulata_B10K-D-IZW-61.COL1a1_Cyg-Gall.consensus:AnsAna_Aythya_americana_D2006016050.COL1a1_Cyg-Gall.consensus:AnsAna_Cereopsis_novaehollandiae_B10K-D-IZW-75.COL1a1_Cyg-Gall.consensus:AnsAna_Branta_leucopsis_DBGNRM65.COL1a1_Cyg-Gall.consensus:AnsAna_Aythya_marila_GCA_029042245.1.COL1a1_Cyg-Gall.consensus:AnsAna_Tadorna_tadorna_DBGNRM58.COL1a1_Cyg-Gall.consensus:AnsAna_Anser_cygnoides_…	DB Search
GATGEP(+15.99)GPLGVSGP(+15.99)PGAR	88.97	1607.79	18	-3.6	804.9	2	37.0982	24811	20201209_Lumos_Ritcher_sample148_17.raw		0	0	Proline Oxidation;Proline Oxidation	P6:Proline Oxidation:0.00;P14:Proline Oxidation:0.00	AnsAna_Spatula_platalea_D2007020414.COL1a2_Anas.consensus:AnsAna_Chloephaga_rubidiceps_D2104051194.COL1a2_Anas.consensus:AnsAna_Cygnus_atratus_GCA_013377495.2.COL1a2_Anas.consensus:AnsAna_Plectropterus_gambensis_B10K-D-WWT-22.COL1a2_Anas.consensus:AnsAna_Aythya_affinis_CL200153793_L02.COL1a2_Anas.consensus:AnsAna_Somateria_spectabilis_D2006016067.COL1a2_Anas.consensus:AnsAna_Dendrocygna_guttata_B…	DB Search
GATGEP(+15.99)GPLGVSGPP(+15.99)GAR	93.58	1607.79	18	0.7	804.903	2	37.3397	25031	20201209_Lumos_Ritcher_sample148_17.raw	6500000	2	2	Proline Oxidation;Proline Oxidation	P6:Proline Oxidation:0.00;P15:Proline Oxidation:14.02	AnsAna_Spatula_platalea_D2007020414.COL1a2_Anas.consensus:AnsAna_Chloephaga_rubidiceps_D2104051194.COL1a2_Anas.consensus:AnsAna_Cygnus_atratus_GCA_013377495.2.COL1a2_Anas.consensus:AnsAna_Plectropterus_gambensis_B10K-D-WWT-22.COL1a2_Anas.consensus:AnsAna_Aythya_affinis_CL200153793_L02.COL1a2_Anas.consensus:AnsAna_Somateria_spectabilis_D2006016067.COL1a2_Anas.consensus:AnsAna_Dendrocygna_guttata_B…	DB Search
GDAGAP(+15.99)GAP(+15.99)GNQGPPGLQGMP(+15.99)GER	88.48	2235	24	-7	746.001	3	20.7831	7955	20201209_Lumos_Ritcher_sample148_17.raw	36300	1	1	Proline Oxidation;Proline Oxidation;Proline Oxidation	P6:Proline Oxidation:36.20;P9:Proline Oxidation:23.70;P21:Proline Oxidation:20.76	AnsAna_Anas_undulata_B10K-D-IZW-61.COL1a1_Cyg-Gall.consensus:AnsAna_Aythya_americana_D2006016050.COL1a1_Cyg-Gall.consensus:AnsAna_Cereopsis_novaehollandiae_B10K-D-IZW-75.COL1a1_Cyg-Gall.consensus:AnsAna_Branta_leucopsis_DBGNRM65.COL1a1_Cyg-Gall.consensus:AnsAna_Aythya_marila_GCA_029042245.1.COL1a1_Cyg-Gall.consensus:AnsAna_Tadorna_tadorna_DBGNRM58.COL1a1_Cyg-Gall.consensus:AnsAna_Anser_cygnoides_…	DB Search
GDAGATGR	48.61	703.325	8	0.1	352.67	2	2.6934	564	20201209_Lumos_Ritcher_sample148_17.raw	53700	1	1			AnsAna_Spatula_platalea_D2007020414.COL1a2_Anas.consensus:AnsAna_Anas_gibberifrons_D2007020344.COL1a2_Anas.consensus:AnsAna_Spatula_smithii_GCA_035221675.1.COL1a2_Anas.consensus:AnsAna_Spatula_clypeata_D2212160216.COL1a2_Anas.consensus:AnsAna_Anas_melleri_B10K-D-IZW-60.COL1a2_Anas.consensus:AnsAna_Spatula_discors_GCA_032165275.1.COL1a2_Anas.consensus:AnsAna_Anas_capensis_GCA_032357685.1.COL1a2_An…	DB Search
GDAGP(+15.99)P(+15.99)GMTGFP(+15.99)GAAG	47.99	1406.58	16	0.7	704.296	2	25.1629	12473	20201209_Lumos_Ritcher_sample148_17.raw	260000	1	1	Proline Oxidation;Proline Oxidation;Proline Oxidation	P5:Proline Oxidation:1000.00;P6:Proline Oxidation:1000.00;P12:Proline Oxidation:1000.00	AnsAna_Spatula_platalea_D2007020414.COL1a2_Anas.consensus:AnsAna_Chloephaga_rubidiceps_D2104051194.COL1a2_Anas.consensus:AnsAna_Cygnus_atratus_GCA_013377495.2.COL1a2_Anas.consensus:AnsAna_Plectropterus_gambensis_B10K-D-WWT-22.COL1a2_Anas.consensus:AnsAna_Aythya_affinis_CL200153793_L02.COL1a2_Anas.consensus:AnsAna_Somateria_spectabilis_D2006016067.COL1a2_Anas.consensus:AnsAna_Dendrocygna_guttata_B…	DB Search
GDAGP(+15.99)P(+15.99)GMTGFP(+15.99)GAAGR	89.48	1562.68	17	0.1	521.9	3	22.0714	9251	20201209_Lumos_Ritcher_sample148_17.raw	9200000	2	2	Proline Oxidation;Proline Oxidation;Proline Oxidation	P5:Proline Oxidation:1000.00;P6:Proline Oxidation:1000.00;P12:Proline Oxidation:1000.00	AnsAna_Spatula_platalea_D2007020414.COL1a2_Anas.consensus:AnsAna_Chloephaga_rubidiceps_D2104051194.COL1a2_Anas.consensus:AnsAna_Cygnus_atratus_GCA_013377495.2.COL1a2_Anas.consensus:AnsAna_Plectropterus_gambensis_B10K-D-WWT-22.COL1a2_Anas.consensus:AnsAna_Aythya_affinis_CL200153793_L02.COL1a2_Anas.consensus:AnsAna_Somateria_spectabilis_D2006016067.COL1a2_Anas.consensus:AnsAna_Dendrocygna_guttata_B…	DB Search
GDAGP(+15.99)PGPAGPTGAPGPAGAVGAP(+15.99)GPK	94.73	2209.08	27	0	737.366	3	25.7979	13062	20201209_Lumos_Ritcher_sample148_17.raw	270000	1	1	Proline Oxidation;Proline Oxidation	P5:Proline Oxidation:0.00;P24:Proline Oxidation:0.00	AnsAna_Anas_undulata_B10K-D-IZW-61.COL1a1_Cyg-Gall.consensus:AnsAna_Cereopsis_novaehollandiae_B10K-D-IZW-75.COL1a1_Cyg-Gall.consensus:AnsAna_Aythya_marila_GCA_029042245.1.COL1a1_Cyg-Gall.consensus:AnsAna_Tadorna_tadorna_DBGNRM58.COL1a1_Cyg-Gall.consensus:AnsAna_Anser_cygnoides_GCA_025388735.1.COL1a1_Cyg-Gall.consensus:AnsAna_Branta_hutchinsii_GCA_032270845.1.COL1a1_Cyg-Gall.consensus:AnsAna_Spatu…	DB Search
GDAGPP(+15.99)GMTGFP(+15.99)GAAGR	94.97	1546.68	17	-0.4	774.349	2	29.6373	17038	20201209_Lumos_Ritcher_sample148_17.raw	408000	1	1	Proline Oxidation;Proline Oxidation	P6:Proline Oxidation:30.46;P12:Proline Oxidation:119.46	AnsAna_Spatula_platalea_D2007020414.COL1a2_Anas.consensus:AnsAna_Chloephaga_rubidiceps_D2104051194.COL1a2_Anas.consensus:AnsAna_Cygnus_atratus_GCA_013377495.2.COL1a2_Anas.consensus:AnsAna_Plectropterus_gambensis_B10K-D-WWT-22.COL1a2_Anas.consensus:AnsAna_Aythya_affinis_CL200153793_L02.COL1a2_Anas.consensus:AnsAna_Somateria_spectabilis_D2006016067.COL1a2_Anas.consensus:AnsAna_Dendrocygna_guttata_B…	DB Search
GDAGPP(+15.99)GPAGPTGAP(+15.99)GPAGA	91.63	1602.73	20	-0.7	802.37	2	22.7709	10005	20201209_Lumos_Ritcher_sample148_17.raw	809000	1	1	Proline Oxidation;Proline Oxidation	P6:Proline Oxidation:20.00;P15:Proline Oxidation:24.32	AnsAna_Anas_undulata_B10K-D-IZW-61.COL1a1_Cyg-Gall.consensus:AnsAna_Cereopsis_novaehollandiae_B10K-D-IZW-75.COL1a1_Cyg-Gall.consensus:AnsAna_Aythya_marila_GCA_029042245.1.COL1a1_Cyg-Gall.consensus:AnsAna_Tadorna_tadorna_DBGNRM58.COL1a1_Cyg-Gall.consensus:AnsAna_Anser_cygnoides_GCA_025388735.1.COL1a1_Cyg-Gall.consensus:AnsAna_Branta_hutchinsii_GCA_032270845.1.COL1a1_Cyg-Gall.consensus:AnsAna_Spatu…	DB Search
GDAGPP(+15.99)GPAGPTGAP(+15.99)GPAGAVG	66.28	1758.82	22	-0.8	880.415	2	26.3342	13680	20201209_Lumos_Ritcher_sample148_17.raw		0	0	Proline Oxidation;Proline Oxidation	P6:Proline Oxidation:7.21;P15:Proline Oxidation:18.53	AnsAna_Anas_undulata_B10K-D-IZW-61.COL1a1_Cyg-Gall.consensus:AnsAna_Cereopsis_novaehollandiae_B10K-D-IZW-75.COL1a1_Cyg-Gall.consensus:AnsAna_Aythya_marila_GCA_029042245.1.COL1a1_Cyg-Gall.consensus:AnsAna_Tadorna_tadorna_DBGNRM58.COL1a1_Cyg-Gall.consensus:AnsAna_Anser_cygnoides_GCA_025388735.1.COL1a1_Cyg-Gall.consensus:AnsAna_Branta_hutchinsii_GCA_032270845.1.COL1a1_Cyg-Gall.consensus:AnsAna_Spatu…	DB Search
GDAGPP(+15.99)GPAGPTGAP(+15.99)GPAGAVGA	84.88	1829.85	23	0.4	915.935	2	27.9273	15502	20201209_Lumos_Ritcher_sample148_17.raw	438000	1	1	Proline Oxidation;Proline Oxidation	P6:Proline Oxidation:9.34;P15:Proline Oxidation:20.41	AnsAna_Anas_undulata_B10K-D-IZW-61.COL1a1_Cyg-Gall.consensus:AnsAna_Cereopsis_novaehollandiae_B10K-D-IZW-75.COL1a1_Cyg-Gall.consensus:AnsAna_Aythya_marila_GCA_029042245.1.COL1a1_Cyg-Gall.consensus:AnsAna_Tadorna_tadorna_DBGNRM58.COL1a1_Cyg-Gall.consensus:AnsAna_Anser_cygnoides_GCA_025388735.1.COL1a1_Cyg-Gall.consensus:AnsAna_Branta_hutchinsii_GCA_032270845.1.COL1a1_Cyg-Gall.consensus:AnsAna_Spatu…	DB Search
GDAGPP(+15.99)GPAGPTGAP(+15.99)GPAGAVGAP(+15.99)GP(+15.99)K	46.38	2241.07	27	-0.5	1121.54	2	23.8571	11299	20201209_Lumos_Ritcher_sample148_17.raw	58800000	1	1	Proline Oxidation;Proline Oxidation;Proline Oxidation;Proline Oxidation	P6:Proline Oxidation:23.10;P15:Proline Oxidation:28.86;P24:Proline Oxidation:90.54;P26:Proline Oxidation:98.51	AnsAna_Mareca_sibilatrix_GCA_034783215.1.COL1a1_Cyg-Gall.consensus:AnsAna_Cereopsis_novaehollandiae_B10K-D-IZW-75.COL1a1_Cyg-Gall.consensus:AnsAna_Tachyeres_brachypterus_GCA_032357605.1.COL1a1_Cyg-Gall.consensus:AnsAna_Aythya_marila_GCA_029042245.1.COL1a1_Cyg-Gall.consensus:AnsAna_Anser_cygnoides_GCA_025388735.1.COL1a1_Cyg-Gall.consensus:AnsAna_Dendrocygna_guttata_B10K-D-IZW-85.COL1a1_Cyg-Gall.co…	SPIDER
GDAGPP(+15.99)GPAGPTGAP(+15.99)GPAGAVGAP(+15.99)GP(+15.99)KGAR	41.26	2525.23	30	0.1	842.749	3	21.9671	8956	20201209_Lumos_Ritcher_sample148_17.raw	3990000	2	2	Proline Oxidation;Proline Oxidation;Proline Oxidation;Proline Oxidation	P6:Proline Oxidation:8.64;P15:Proline Oxidation:24.32;P24:Proline Oxidation:36.40;P26:Proline Oxidation:41.11	AnsAna_Mareca_sibilatrix_GCA_034783215.1.COL1a1_Cyg-Gall.consensus:AnsAna_Cereopsis_novaehollandiae_B10K-D-IZW-75.COL1a1_Cyg-Gall.consensus:AnsAna_Tachyeres_brachypterus_GCA_032357605.1.COL1a1_Cyg-Gall.consensus:AnsAna_Aythya_marila_GCA_029042245.1.COL1a1_Cyg-Gall.consensus:AnsAna_Anser_cygnoides_GCA_025388735.1.COL1a1_Cyg-Gall.consensus:AnsAna_Dendrocygna_guttata_B10K-D-IZW-85.COL1a1_Cyg-Gall.co…	SPIDER
GDAGPP(+15.99)GPAGPTGAP(+15.99)GPAGAVGAP(+15.99)GPE(sub K)GAR	44.72	2510.18	30	-0.5	1256.1	2	25.5123	12852	20201209_Lumos_Ritcher_sample148_17.raw	341000	1	1	Proline Oxidation;Proline Oxidation;Proline Oxidation;Lys->Glu substitution	P6:Proline Oxidation:11.06;P15:Proline Oxidation:20.41;P24:Proline Oxidation:22.85	AnsAna_Mareca_sibilatrix_GCA_034783215.1.COL1a1_Cyg-Gall.consensus:AnsAna_Cereopsis_novaehollandiae_B10K-D-IZW-75.COL1a1_Cyg-Gall.consensus:AnsAna_Tachyeres_brachypterus_GCA_032357605.1.COL1a1_Cyg-Gall.consensus:AnsAna_Aythya_marila_GCA_029042245.1.COL1a1_Cyg-Gall.consensus:AnsAna_Anser_cygnoides_GCA_025388735.1.COL1a1_Cyg-Gall.consensus:AnsAna_Dendrocygna_guttata_B10K-D-IZW-85.COL1a1_Cyg-Gall.co…	SPIDER
GDAGPP(+15.99)GPAGPTGAP(+15.99)GPAGAVGAP(+15.99)GPK	91.65	2225.07	27	-2.1	1113.54	2	23.8035	11116	20201209_Lumos_Ritcher_sample148_17.raw	136000000	2	2	Proline Oxidation;Proline Oxidation;Proline Oxidation	P6:Proline Oxidation:33.98;P15:Proline Oxidation:26.31;P24:Proline Oxidation:17.01	AnsAna_Anas_undulata_B10K-D-IZW-61.COL1a1_Cyg-Gall.consensus:AnsAna_Cereopsis_novaehollandiae_B10K-D-IZW-75.COL1a1_Cyg-Gall.consensus:AnsAna_Aythya_marila_GCA_029042245.1.COL1a1_Cyg-Gall.consensus:AnsAna_Tadorna_tadorna_DBGNRM58.COL1a1_Cyg-Gall.consensus:AnsAna_Anser_cygnoides_GCA_025388735.1.COL1a1_Cyg-Gall.consensus:AnsAna_Branta_hutchinsii_GCA_032270845.1.COL1a1_Cyg-Gall.consensus:AnsAna_Spatu…	DB Search
GDAGPP(+15.99)GPAGPTGAP(+15.99)GPAGAVGAPGP(+15.99)K	91.5	2225.07	27	0.2	742.698	3	23.7229	11027	20201209_Lumos_Ritcher_sample148_17.raw		0	0	Proline Oxidation;Proline Oxidation;Proline Oxidation	P6:Proline Oxidation:9.16;P15:Proline Oxidation:32.28;P26:Proline Oxidation:0.00	AnsAna_Anas_undulata_B10K-D-IZW-61.COL1a1_Cyg-Gall.consensus:AnsAna_Cereopsis_novaehollandiae_B10K-D-IZW-75.COL1a1_Cyg-Gall.consensus:AnsAna_Aythya_marila_GCA_029042245.1.COL1a1_Cyg-Gall.consensus:AnsAna_Tadorna_tadorna_DBGNRM58.COL1a1_Cyg-Gall.consensus:AnsAna_Anser_cygnoides_GCA_025388735.1.COL1a1_Cyg-Gall.consensus:AnsAna_Branta_hutchinsii_GCA_032270845.1.COL1a1_Cyg-Gall.consensus:AnsAna_Spatu…	DB Search
GDKGETGEQGDR	94.8	1247.54	12	0.1	416.853	3	8.7364	1823	20201209_Lumos_Ritcher_sample148_17.raw	21700	1	1			AnsAna_Anas_undulata_B10K-D-IZW-61.COL1a1_Cyg-Gall.consensus:AnsAna_Aythya_americana_D2006016050.COL1a1_Cyg-Gall.consensus:AnsAna_Pteronetta_hartlaubii_D2102046034.COL1a1_Cyg-Gall.consensus:AnsAna_Cereopsis_novaehollandiae_B10K-D-IZW-75.COL1a1_Cyg-Gall.consensus:AnsAna_Branta_leucopsis_DBGNRM65.COL1a1_Cyg-Gall.consensus:AnsAna_Aythya_marila_GCA_029042245.1.COL1a1_Cyg-Gall.consensus:AnsAna_Tadorna…	DB Search
GDP(+15.99)GP(+15.99)AGHVGP(+15.99)AGAFGPR	85.34	1663.77	18	-0.2	555.597	3	32.7441	20283	20201209_Lumos_Ritcher_sample148_17.raw	2780000	2	2	Proline Oxidation;Proline Oxidation;Proline Oxidation	P3:Proline Oxidation:76.69;P5:Proline Oxidation:65.27;P11:Proline Oxidation:102.87	AnsAna_Lophodytes_cucullatus_B10K-D-WWT-15.COL1a2_Anas.consensus:AnsAna_Spatula_platalea_D2007020414.COL1a2_Anas.consensus:AnsAna_Spatula_smithii_GCA_035221675.1.COL1a2_Anas.consensus:AnsAna_Anas_gibberifrons_D2007020344.COL1a2_Anas.consensus:AnsAna_Aythya_baeri_GCA_026413565.1.COL1a2_Anas.consensus:AnsAna_Cyanochen_cyanoptera_B10K-D-WWT-10.COL1a2_Anas.consensus:AnsAna_Chloephaga_rubidiceps_D2104…	DB Search
GDP(+15.99)GP(+15.99)AGHVGPAGAFGPR	93.34	1647.78	18	-0.6	550.265	3	33.5416	21245	20201209_Lumos_Ritcher_sample148_17.raw	23000000	4	4	Proline Oxidation;Proline Oxidation	P3:Proline Oxidation:30.16;P5:Proline Oxidation:51.01	AnsAna_Lophodytes_cucullatus_B10K-D-WWT-15.COL1a2_Anas.consensus:AnsAna_Spatula_platalea_D2007020414.COL1a2_Anas.consensus:AnsAna_Spatula_smithii_GCA_035221675.1.COL1a2_Anas.consensus:AnsAna_Anas_gibberifrons_D2007020344.COL1a2_Anas.consensus:AnsAna_Aythya_baeri_GCA_026413565.1.COL1a2_Anas.consensus:AnsAna_Cyanochen_cyanoptera_B10K-D-WWT-10.COL1a2_Anas.consensus:AnsAna_Chloephaga_rubidiceps_D2104…	DB Search
GDP(+15.99)GPAGHVGP(+15.99)AGAFGP(+15.99)R	59.13	1663.77	18	-0.1	832.892	2	32.2867	20121	20201209_Lumos_Ritcher_sample148_17.raw	33100000	2	2	Proline Oxidation;Proline Oxidation;Proline Oxidation	P3:Proline Oxidation:43.88;P11:Proline Oxidation:60.10;P17:Proline Oxidation:0.00	AnsAna_Lophodytes_cucullatus_B10K-D-WWT-15.COL1a2_Anas.consensus:AnsAna_Spatula_platalea_D2007020414.COL1a2_Anas.consensus:AnsAna_Spatula_smithii_GCA_035221675.1.COL1a2_Anas.consensus:AnsAna_Anas_gibberifrons_D2007020344.COL1a2_Anas.consensus:AnsAna_Aythya_baeri_GCA_026413565.1.COL1a2_Anas.consensus:AnsAna_Cyanochen_cyanoptera_B10K-D-WWT-10.COL1a2_Anas.consensus:AnsAna_Chloephaga_rubidiceps_D2104…	DB Search
GDP(+15.99)GPAGHVGPAGAF	84.62	1321.61	15	1	661.81	2	31.4713	18725	20201209_Lumos_Ritcher_sample148_17.raw	1440000	1	1	Proline Oxidation	P3:Proline Oxidation:48.87	AnsAna_Lophodytes_cucullatus_B10K-D-WWT-15.COL1a2_Anas.consensus:AnsAna_Spatula_platalea_D2007020414.COL1a2_Anas.consensus:AnsAna_Spatula_smithii_GCA_035221675.1.COL1a2_Anas.consensus:AnsAna_Anas_gibberifrons_D2007020344.COL1a2_Anas.consensus:AnsAna_Aythya_baeri_GCA_026413565.1.COL1a2_Anas.consensus:AnsAna_Cyanochen_cyanoptera_B10K-D-WWT-10.COL1a2_Anas.consensus:AnsAna_Chloephaga_rubidiceps_D2104…	DB Search
GDP(+15.99)GPAGHVGPAGAFGPR	92.88	1631.78	18	-2.6	816.895	2	27.2048	14607	20201209_Lumos_Ritcher_sample148_17.raw		0	0	Proline Oxidation	P3:Proline Oxidation:28.86	AnsAna_Lophodytes_cucullatus_B10K-D-WWT-15.COL1a2_Anas.consensus:AnsAna_Spatula_platalea_D2007020414.COL1a2_Anas.consensus:AnsAna_Spatula_smithii_GCA_035221675.1.COL1a2_Anas.consensus:AnsAna_Anas_gibberifrons_D2007020344.COL1a2_Anas.consensus:AnsAna_Aythya_baeri_GCA_026413565.1.COL1a2_Anas.consensus:AnsAna_Cyanochen_cyanoptera_B10K-D-WWT-10.COL1a2_Anas.consensus:AnsAna_Chloephaga_rubidiceps_D2104…	DB Search
GDP(+15.99)GPAGHVGPAGAFGPRGLAGPQ(+0.98)GPR	52.51	2466.22	27	0.1	823.079	3	34.7066	22315	20201209_Lumos_Ritcher_sample148_17.raw	594000	1	1	Proline Oxidation;Deamidation (NQ)	P3:Proline Oxidation:0.00;Q24:Deamidation (NQ):1000.00	AnsAna_Lophodytes_cucullatus_B10K-D-WWT-15.COL1a2_Anas.consensus:AnsAna_Spatula_platalea_D2007020414.COL1a2_Anas.consensus:AnsAna_Spatula_smithii_GCA_035221675.1.COL1a2_Anas.consensus:AnsAna_Anas_gibberifrons_D2007020344.COL1a2_Anas.consensus:AnsAna_Aythya_baeri_GCA_026413565.1.COL1a2_Anas.consensus:AnsAna_Cyanochen_cyanoptera_B10K-D-WWT-10.COL1a2_Anas.consensus:AnsAna_Chloephaga_rubidiceps_D2104…	DB Search
GDPGP(+13.98)AGHVGPAGAFGPR	41.98	1629.76	18	0	544.262	3	31.4217	18874	20201209_Lumos_Ritcher_sample148_17.raw	205000	1	1	Proline oxidation to pyroglutamic acid	P5:Proline oxidation to pyroglutamic acid:8.22	AnsAna_Lophodytes_cucullatus_B10K-D-WWT-15.COL1a2_Anas.consensus:AnsAna_Spatula_platalea_D2007020414.COL1a2_Anas.consensus:AnsAna_Anas_gibberifrons_D2007020344.COL1a2_Anas.consensus:AnsAna_Spatula_smithii_GCA_035221675.1.COL1a2_Anas.consensus:AnsAna_Aythya_baeri_GCA_026413565.1.COL1a2_Anas.consensus:AnsAna_Cyanochen_cyanoptera_B10K-D-WWT-10.COL1a2_Anas.consensus:AnsAna_Heteronetta_atricapilla_GCA…	PEAKS PTM
GDPGP(+15.99)AGHVGPAGAFGPRGLAGPQGPR	46.41	2465.23	27	-8.9	822.744	3	34.9088	22489	20201209_Lumos_Ritcher_sample148_17.raw	479000	1	1	Proline Oxidation	P5:Proline Oxidation:7.32	AnsAna_Lophodytes_cucullatus_B10K-D-WWT-15.COL1a2_Anas.consensus:AnsAna_Spatula_platalea_D2007020414.COL1a2_Anas.consensus:AnsAna_Spatula_smithii_GCA_035221675.1.COL1a2_Anas.consensus:AnsAna_Anas_gibberifrons_D2007020344.COL1a2_Anas.consensus:AnsAna_Aythya_baeri_GCA_026413565.1.COL1a2_Anas.consensus:AnsAna_Cyanochen_cyanoptera_B10K-D-WWT-10.COL1a2_Anas.consensus:AnsAna_Chloephaga_rubidiceps_D2104…	DB Search
GDPGPAGD(sub H)VGPAGAFGPR	43.29	1593.75	18	-0.6	532.258	3	33.6218	21210	20201209_Lumos_Ritcher_sample148_17.raw	9080000	1	1	His->Asp substitution		AnsAna_Alopochen_aegyptiaca_D1907004292.COL1a2_Anas.consensus:AnsAna_Mergellus_albellus_B10K-D-WWT-19.COL1a2_Anas.consensus:AnsAna_Anas_gibberifrons_D2007020344.COL1a2_Anas.consensus:AnsAna_Lophonetta_specularioides_GCA_032165235.1.COL1a2_Anas.consensus:AnsAna_Mareca_falcata_D2006016302.COL1a2_Anas.consensus:AnsAna_Aythya_americana_D2006016050.COL1a2_Anas.consensus:AnsAna_Chloephaga_picta_B10K-D-…	SPIDER
GDPGPAGHVGPAGAFGPR	91.03	1615.79	18	0.2	808.9	2	28.1127	15589	20201209_Lumos_Ritcher_sample148_17.raw	31000000	2	2			AnsAna_Lophodytes_cucullatus_B10K-D-WWT-15.COL1a2_Anas.consensus:AnsAna_Spatula_platalea_D2007020414.COL1a2_Anas.consensus:AnsAna_Spatula_smithii_GCA_035221675.1.COL1a2_Anas.consensus:AnsAna_Anas_gibberifrons_D2007020344.COL1a2_Anas.consensus:AnsAna_Aythya_baeri_GCA_026413565.1.COL1a2_Anas.consensus:AnsAna_Cyanochen_cyanoptera_B10K-D-WWT-10.COL1a2_Anas.consensus:AnsAna_Chloephaga_rubidiceps_D2104…	DB Search
GDPGPAGN(sub H)VGPAGAFGPR	43.11	1592.77	18	0.4	797.392	2	32.5529	20013	20201209_Lumos_Ritcher_sample148_17.raw	2080000	1	1	His->Asn substitution		AnsAna_Alopochen_aegyptiaca_D1907004292.COL1a2_Anas.consensus:AnsAna_Mergellus_albellus_B10K-D-WWT-19.COL1a2_Anas.consensus:AnsAna_Anas_gibberifrons_D2007020344.COL1a2_Anas.consensus:AnsAna_Lophonetta_specularioides_GCA_032165235.1.COL1a2_Anas.consensus:AnsAna_Mareca_falcata_D2006016302.COL1a2_Anas.consensus:AnsAna_Aythya_americana_D2006016050.COL1a2_Anas.consensus:AnsAna_Chloephaga_picta_B10K-D-…	SPIDER
GDRGETGPAGP(+15.99)PGAP(+15.99)GAPGAP(+15.99)GPVGPAGK	89.27	2496.2	29	0.5	625.057	4	21.3448	8566	20201209_Lumos_Ritcher_sample148_17.raw		0	0	Proline Oxidation;Proline Oxidation;Proline Oxidation	P11:Proline Oxidation:0.00;P15:Proline Oxidation:16.66;P21:Proline Oxidation:20.41	AnsAna_Anas_undulata_B10K-D-IZW-61.COL1a1_Cyg-Gall.consensus:AnsAna_Aythya_americana_D2006016050.COL1a1_Cyg-Gall.consensus:AnsAna_Pteronetta_hartlaubii_D2102046034.COL1a1_Cyg-Gall.consensus:AnsAna_Cereopsis_novaehollandiae_B10K-D-IZW-75.COL1a1_Cyg-Gall.consensus:AnsAna_Branta_leucopsis_DBGNRM65.COL1a1_Cyg-Gall.consensus:AnsAna_Aythya_marila_GCA_029042245.1.COL1a1_Cyg-Gall.consensus:AnsAna_Tadorna…	DB Search
GDRGETGPAGP(+15.99)PGAPGAP(+15.99)GAP(+15.99)GPVGPAGK	102.96	2496.2	29	0.5	625.057	4	21.8033	9023	20201209_Lumos_Ritcher_sample148_17.raw	2270000	2	2	Proline Oxidation;Proline Oxidation;Proline Oxidation	P11:Proline Oxidation:11.06;P18:Proline Oxidation:9.42;P21:Proline Oxidation:9.40	AnsAna_Anas_undulata_B10K-D-IZW-61.COL1a1_Cyg-Gall.consensus:AnsAna_Aythya_americana_D2006016050.COL1a1_Cyg-Gall.consensus:AnsAna_Pteronetta_hartlaubii_D2102046034.COL1a1_Cyg-Gall.consensus:AnsAna_Cereopsis_novaehollandiae_B10K-D-IZW-75.COL1a1_Cyg-Gall.consensus:AnsAna_Branta_leucopsis_DBGNRM65.COL1a1_Cyg-Gall.consensus:AnsAna_Aythya_marila_GCA_029042245.1.COL1a1_Cyg-Gall.consensus:AnsAna_Tadorna…	DB Search
GDRGETGPAGP(+15.99)PGAPGAP(+15.99)GAPGP(+15.99)VGPAGK	66.64	2496.2	29	0.3	833.074	3	22.5535	9764	20201209_Lumos_Ritcher_sample148_17.raw		0	0	Proline Oxidation;Proline Oxidation;Proline Oxidation	P11:Proline Oxidation:0.00;P18:Proline Oxidation:12.33;P23:Proline Oxidation:8.22	AnsAna_Anas_undulata_B10K-D-IZW-61.COL1a1_Cyg-Gall.consensus:AnsAna_Aythya_americana_D2006016050.COL1a1_Cyg-Gall.consensus:AnsAna_Pteronetta_hartlaubii_D2102046034.COL1a1_Cyg-Gall.consensus:AnsAna_Cereopsis_novaehollandiae_B10K-D-IZW-75.COL1a1_Cyg-Gall.consensus:AnsAna_Branta_leucopsis_DBGNRM65.COL1a1_Cyg-Gall.consensus:AnsAna_Aythya_marila_GCA_029042245.1.COL1a1_Cyg-Gall.consensus:AnsAna_Tadorna…	DB Search
GDRGETGPAGPP(+15.99)GAP(+15.99)GAP(+15.99)GAP(+15.99)GPVGPAGK	47.54	2512.19	29	-0.8	1257.1	2	20.2092	7606	20201209_Lumos_Ritcher_sample148_17.raw	19900000	1	1	Proline Oxidation;Proline Oxidation;Proline Oxidation;Proline Oxidation	P12:Proline Oxidation:33.98;P15:Proline Oxidation:59.30;P18:Proline Oxidation:76.42;P21:Proline Oxidation:30.83	AnsAna_Spatula_discors_GCA_032165275.1.COL1a1_Cyg-Gall.consensus:AnsAna_Mareca_sibilatrix_GCA_034783215.1.COL1a1_Cyg-Gall.consensus:AnsAna_Pteronetta_hartlaubii_D2102046034.COL1a1_Cyg-Gall.consensus:AnsAna_Tachyeres_brachypterus_GCA_032357605.1.COL1a1_Cyg-Gall.consensus:AnsAna_Branta_leucopsis_DBGNRM65.COL1a1_Cyg-Gall.consensus:AnsAna_Aythya_marila_GCA_029042245.1.COL1a1_Cyg-Gall.consensus:AnsAna…	SPIDER
GDRGETGPAGPP(+15.99)GAP(+15.99)GAPGAP(+15.99)GPVGPAGK	95.73	2496.2	29	-0.4	1249.11	2	21.4749	8651	20201209_Lumos_Ritcher_sample148_17.raw	920000	1	1	Proline Oxidation;Proline Oxidation;Proline Oxidation	P12:Proline Oxidation:26.02;P15:Proline Oxidation:40.63;P21:Proline Oxidation:39.76	AnsAna_Anas_undulata_B10K-D-IZW-61.COL1a1_Cyg-Gall.consensus:AnsAna_Aythya_americana_D2006016050.COL1a1_Cyg-Gall.consensus:AnsAna_Pteronetta_hartlaubii_D2102046034.COL1a1_Cyg-Gall.consensus:AnsAna_Cereopsis_novaehollandiae_B10K-D-IZW-75.COL1a1_Cyg-Gall.consensus:AnsAna_Branta_leucopsis_DBGNRM65.COL1a1_Cyg-Gall.consensus:AnsAna_Aythya_marila_GCA_029042245.1.COL1a1_Cyg-Gall.consensus:AnsAna_Tadorna…	DB Search
GDRGETGPAGPP(+15.99)GAPGAP(+15.99)GAP(+15.99)GPVGPAGK	95.46	2496.2	29	-0.4	833.073	3	21.4922	8976	20201209_Lumos_Ritcher_sample148_17.raw	115000000	2	2	Proline Oxidation;Proline Oxidation;Proline Oxidation	P12:Proline Oxidation:30.46;P18:Proline Oxidation:47.09;P21:Proline Oxidation:22.85	AnsAna_Anas_undulata_B10K-D-IZW-61.COL1a1_Cyg-Gall.consensus:AnsAna_Aythya_americana_D2006016050.COL1a1_Cyg-Gall.consensus:AnsAna_Pteronetta_hartlaubii_D2102046034.COL1a1_Cyg-Gall.consensus:AnsAna_Cereopsis_novaehollandiae_B10K-D-IZW-75.COL1a1_Cyg-Gall.consensus:AnsAna_Branta_leucopsis_DBGNRM65.COL1a1_Cyg-Gall.consensus:AnsAna_Aythya_marila_GCA_029042245.1.COL1a1_Cyg-Gall.consensus:AnsAna_Tadorna…	DB Search
GDRGETGPAGPP(+15.99)GAPGAPGAP(+15.99)GPVGPAGK	95.88	2480.2	29	-1.4	827.741	3	23.2497	10475	20201209_Lumos_Ritcher_sample148_17.raw	2910000	1	1	Proline Oxidation;Proline Oxidation	P12:Proline Oxidation:8.69;P21:Proline Oxidation:12.33	AnsAna_Anas_undulata_B10K-D-IZW-61.COL1a1_Cyg-Gall.consensus:AnsAna_Aythya_americana_D2006016050.COL1a1_Cyg-Gall.consensus:AnsAna_Pteronetta_hartlaubii_D2102046034.COL1a1_Cyg-Gall.consensus:AnsAna_Cereopsis_novaehollandiae_B10K-D-IZW-75.COL1a1_Cyg-Gall.consensus:AnsAna_Branta_leucopsis_DBGNRM65.COL1a1_Cyg-Gall.consensus:AnsAna_Aythya_marila_GCA_029042245.1.COL1a1_Cyg-Gall.consensus:AnsAna_Tadorna…	DB Search
GDRGETGPTGPPGAP(+15.99)GAP(+15.99)GAP(+15.99)GPVGPAGK	57.07	2526.21	29	-2.3	843.075	3	20.0662	7366	20201209_Lumos_Ritcher_sample148_17.raw	919000	1	1	Proline Oxidation;Proline Oxidation;Proline Oxidation	P15:Proline Oxidation:26.08;P18:Proline Oxidation:29.88;P21:Proline Oxidation:13.67	AnsAna_Melanitta_americana_D2212160212.COL1a1_Cyg-Gall.consensus	DB Search
GDVGP(+15.99)VGRTGEQGIGGPP(+15.99)GFAGEK	91.36	2270.09	24	-5.2	757.701	3	35.0969	22855	20201209_Lumos_Ritcher_sample148_17.raw	903000	1	1	Proline Oxidation;Proline Oxidation	P5:Proline Oxidation:7.86;P18:Proline Oxidation:14.02	AnsAna_Cygnus_cygnus_DBG88.COL1a2_Anas.consensus:AnsAna_Cygnus_buccinator_GCA_019232035.1.COL1a2_Anas.consensus:AnsAna_Cygnus_columbianus_DBG-71.COL1a2_Anas.consensus	DB Search
GDVGPVGR	92.28	755.393	8	0.1	378.704	2	15.3949	3695	20201209_Lumos_Ritcher_sample148_17.raw	976000	1	1			AnsAna_Spatula_platalea_D2007020414.COL1a2_Anas.consensus:AnsAna_Chloephaga_rubidiceps_D2104051194.COL1a2_Anas.consensus:AnsAna_Cygnus_atratus_GCA_013377495.2.COL1a2_Anas.consensus:AnsAna_Plectropterus_gambensis_B10K-D-WWT-22.COL1a2_Anas.consensus:AnsAna_Aythya_affinis_CL200153793_L02.COL1a2_Anas.consensus:AnsAna_Somateria_spectabilis_D2006016067.COL1a2_Anas.consensus:AnsAna_Dendrocygna_guttata_B…	DB Search
GEFGVP(+15.99)GPAGPR	52.59	1155.57	12	1.3	578.792	2	28.4598	15777	20201209_Lumos_Ritcher_sample148_17.raw	4730000	1	1	Proline Oxidation	P6:Proline Oxidation:0.00	AnsAna_Spatula_platalea_D2007020414.COL1a2_Anas.consensus:AnsAna_Chloephaga_rubidiceps_D2104051194.COL1a2_Anas.consensus:AnsAna_Cygnus_atratus_GCA_013377495.2.COL1a2_Anas.consensus:AnsAna_Plectropterus_gambensis_B10K-D-WWT-22.COL1a2_Anas.consensus:AnsAna_Aythya_affinis_CL200153793_L02.COL1a2_Anas.consensus:AnsAna_Somateria_spectabilis_D2006016067.COL1a2_Anas.consensus:AnsAna_Dendrocygna_guttata_B…	DB Search
GEFGVPGP(+15.99)AGP(+15.99)R	70.34	1171.56	12	0.4	586.789	2	25.1952	12493	20201209_Lumos_Ritcher_sample148_17.raw		0	0	Proline Oxidation;Proline Oxidation	P8:Proline Oxidation:22.85;P11:Proline Oxidation:29.88	AnsAna_Spatula_platalea_D2007020414.COL1a2_Anas.consensus:AnsAna_Chloephaga_rubidiceps_D2104051194.COL1a2_Anas.consensus:AnsAna_Cygnus_atratus_GCA_013377495.2.COL1a2_Anas.consensus:AnsAna_Plectropterus_gambensis_B10K-D-WWT-22.COL1a2_Anas.consensus:AnsAna_Aythya_affinis_CL200153793_L02.COL1a2_Anas.consensus:AnsAna_Somateria_spectabilis_D2006016067.COL1a2_Anas.consensus:AnsAna_Dendrocygna_guttata_B…	DB Search
GEGGPAGPAGP(+15.99)AGARGIPGER	63.11	1845.91	21	-0.6	616.31	3	22.2286	9464	20201209_Lumos_Ritcher_sample148_17.raw	164000	1	1	Proline Oxidation	P11:Proline Oxidation:8.82	AnsAna_Spatula_platalea_D2007020414.COL1a2_Anas.consensus:AnsAna_Chloephaga_rubidiceps_D2104051194.COL1a2_Anas.consensus:AnsAna_Cygnus_atratus_GCA_013377495.2.COL1a2_Anas.consensus:AnsAna_Aythya_affinis_CL200153793_L02.COL1a2_Anas.consensus:AnsAna_Somateria_spectabilis_D2006016067.COL1a2_Anas.consensus:AnsAna_Dendrocygna_guttata_B10K-D-IZW-85.COL1a2_Anas.consensus:AnsAna_Dendrocygna_arborea_B10K-…	DB Search
GEGGPAGPAGPAGAR	82.75	1220.59	15	-0.1	611.302	2	16.0864	3954	20201209_Lumos_Ritcher_sample148_17.raw	766000	1	1			AnsAna_Spatula_platalea_D2007020414.COL1a2_Anas.consensus:AnsAna_Chloephaga_rubidiceps_D2104051194.COL1a2_Anas.consensus:AnsAna_Cygnus_atratus_GCA_013377495.2.COL1a2_Anas.consensus:AnsAna_Aythya_affinis_CL200153793_L02.COL1a2_Anas.consensus:AnsAna_Somateria_spectabilis_D2006016067.COL1a2_Anas.consensus:AnsAna_Dendrocygna_guttata_B10K-D-IZW-85.COL1a2_Anas.consensus:AnsAna_Dendrocygna_arborea_B10K-…	DB Search
GEGGPAGPAGPAGARGIP(+15.99)GER	80.5	1845.91	21	-0.6	616.31	3	22.2286	9403	20201209_Lumos_Ritcher_sample148_17.raw	164000	1	1	Proline Oxidation	P18:Proline Oxidation:0.00	AnsAna_Spatula_platalea_D2007020414.COL1a2_Anas.consensus:AnsAna_Chloephaga_rubidiceps_D2104051194.COL1a2_Anas.consensus:AnsAna_Cygnus_atratus_GCA_013377495.2.COL1a2_Anas.consensus:AnsAna_Aythya_affinis_CL200153793_L02.COL1a2_Anas.consensus:AnsAna_Somateria_spectabilis_D2006016067.COL1a2_Anas.consensus:AnsAna_Dendrocygna_guttata_B10K-D-IZW-85.COL1a2_Anas.consensus:AnsAna_Dendrocygna_arborea_B10K-…	DB Search
GEIGLP(+15.99)GSSGPVGP(+15.99)PGNP(+15.99)GANG	86.28	1934.9	22	-4.2	968.452	2	31.6631	18922	20201209_Lumos_Ritcher_sample148_17.raw	183000	1	1	Proline Oxidation;Proline Oxidation;Proline Oxidation	P6:Proline Oxidation:3.36;P14:Proline Oxidation:0.00;P18:Proline Oxidation:5.08	AnsAna_Spatula_platalea_D2007020414.COL1a2_Anas.consensus:AnsAna_Chloephaga_rubidiceps_D2104051194.COL1a2_Anas.consensus:AnsAna_Cygnus_atratus_GCA_013377495.2.COL1a2_Anas.consensus:AnsAna_Plectropterus_gambensis_B10K-D-WWT-22.COL1a2_Anas.consensus:AnsAna_Aythya_affinis_CL200153793_L02.COL1a2_Anas.consensus:AnsAna_Somateria_spectabilis_D2006016067.COL1a2_Anas.consensus:AnsAna_Dendrocygna_guttata_B…	DB Search
GEIGLP(+15.99)GSSGPVGPP(+15.99)GN	92.96	1522.73	17	0.3	762.371	2	31.8756	19404	20201209_Lumos_Ritcher_sample148_17.raw		0	0	Proline Oxidation;Proline Oxidation	P6:Proline Oxidation:47.64;P15:Proline Oxidation:9.34	AnsAna_Spatula_platalea_D2007020414.COL1a2_Anas.consensus:AnsAna_Chloephaga_rubidiceps_D2104051194.COL1a2_Anas.consensus:AnsAna_Cygnus_atratus_GCA_013377495.2.COL1a2_Anas.consensus:AnsAna_Plectropterus_gambensis_B10K-D-WWT-22.COL1a2_Anas.consensus:AnsAna_Aythya_affinis_CL200153793_L02.COL1a2_Anas.consensus:AnsAna_Somateria_spectabilis_D2006016067.COL1a2_Anas.consensus:AnsAna_Dendrocygna_guttata_B…	DB Search
GEIGLP(+15.99)GSSGPVGPP(+15.99)GN(+0.98)	98.06	1523.71	17	-0.2	762.862	2	33.3929	21009	20201209_Lumos_Ritcher_sample148_17.raw		0	0	Proline Oxidation;Proline Oxidation;Deamidation (NQ)	P6:Proline Oxidation:16.28;P15:Proline Oxidation:11.06;N17:Deamidation (NQ):1000.00	AnsAna_Spatula_platalea_D2007020414.COL1a2_Anas.consensus:AnsAna_Chloephaga_rubidiceps_D2104051194.COL1a2_Anas.consensus:AnsAna_Cygnus_atratus_GCA_013377495.2.COL1a2_Anas.consensus:AnsAna_Plectropterus_gambensis_B10K-D-WWT-22.COL1a2_Anas.consensus:AnsAna_Aythya_affinis_CL200153793_L02.COL1a2_Anas.consensus:AnsAna_Somateria_spectabilis_D2006016067.COL1a2_Anas.consensus:AnsAna_Dendrocygna_guttata_B…	DB Search
GEIGLP(+15.99)GSSGPVGPP(+15.99)GNP(+15.99)GAN(+0.98)GLP(+15.99)GAK	41.5	2418.17	27	-0.1	1210.09	2	32.5951	20011	20201209_Lumos_Ritcher_sample148_17.raw	11800000	1	1	Proline Oxidation;Proline Oxidation;Proline Oxidation;Deamidation (NQ);Proline Oxidation	P6:Proline Oxidation:84.49;P15:Proline Oxidation:26.02;P18:Proline Oxidation:80.90;N21:Deamidation (NQ):1000.00;P24:Proline Oxidation:158.16	AnsAna_Anas_gibberifrons_D2007020344.COL1a2_Anas.consensus:AnsAna_Cygnus_olor_GCA_009769485.2.COL1a2_Anas.consensus:AnsAna_Aythya_americana_D2006016050.COL1a2_Anas.consensus:AnsAna_Plectropterus_gambensis_B10K-D-WWT-22.COL1a2_Anas.consensus:AnsAna_Stictonetta_naevosa_GCA_011074415.1.COL1a2_Anas.consensus:AnsAna_Aythya_ferina_D1907000514.COL1a2_Anas.consensus:AnsAna_Marmaronetta_angustirostris_D19…	SPIDER
GEIGP(+15.99)AGN(+0.98)VGPSGP(+15.99)AGPR	44.75	1621.77	18	-0.1	811.892	2	31.8106	19335	20201209_Lumos_Ritcher_sample148_17.raw		0	0	Proline Oxidation;Deamidation (NQ);Proline Oxidation	P5:Proline Oxidation:34.81;N8:Deamidation (NQ):1000.00;P14:Proline Oxidation:9.42	AnsAna_Oxyura_jamaicensis_GCA_011077185.1.COL1a2_Anas.consensus:AnsAna_Cereopsis_novaehollandiae_B10K-D-IZW-75.COL1a2_Anas.consensus:AnsAna_Cygnus_olor_GCA_009769485.2.COL1a2_Anas.consensus:AnsAna_Stictonetta_naevosa_D2006016299.COL1a2_Anas.consensus:AnsAna_Cygnus_atratus_GCA_013377495.2.COL1a2_Anas.consensus:AnsAna_Coscoroba_coscoroba_D2102046636.COL1a2_Anas.consensus:AnsAna_Dendrocygna_autumnal…	DB Search
GEIGP(+15.99)AGN(+0.98)VGPTGPAGP(+15.99)RGEIGLPGSS	43.05	2433.18	27	-0.7	812.066	3	32.0218	19639	20201209_Lumos_Ritcher_sample148_17.raw	5920000	1	1	Proline Oxidation;Deamidation (NQ);Proline Oxidation	P5:Proline Oxidation:34.81;N8:Deamidation (NQ):1000.00;P17:Proline Oxidation:0.00	AnsAna_Spatula_platalea_D2007020414.COL1a2_Anas.consensus:AnsAna_Chloephaga_rubidiceps_D2104051194.COL1a2_Anas.consensus:AnsAna_Plectropterus_gambensis_B10K-D-WWT-22.COL1a2_Anas.consensus:AnsAna_Aythya_affinis_CL200153793_L02.COL1a2_Anas.consensus:AnsAna_Somateria_spectabilis_D2006016067.COL1a2_Anas.consensus:AnsAna_Neochen_jubata_B10K-D-WWT-20.COL1a2_Anas.consensus:AnsAna_Anas_fulvigula_D2005012…	DB Search
GEIGP(+15.99)AGN(+0.98)VGPTGPAGPR	86.64	1619.79	18	2.2	810.904	2	25.7891	12845	20201209_Lumos_Ritcher_sample148_17.raw	118000	1	1	Proline Oxidation;Deamidation (NQ)	P5:Proline Oxidation:34.80;N8:Deamidation (NQ):1000.00	AnsAna_Spatula_platalea_D2007020414.COL1a2_Anas.consensus:AnsAna_Chloephaga_rubidiceps_D2104051194.COL1a2_Anas.consensus:AnsAna_Plectropterus_gambensis_B10K-D-WWT-22.COL1a2_Anas.consensus:AnsAna_Aythya_affinis_CL200153793_L02.COL1a2_Anas.consensus:AnsAna_Somateria_spectabilis_D2006016067.COL1a2_Anas.consensus:AnsAna_Neochen_jubata_B10K-D-WWT-20.COL1a2_Anas.consensus:AnsAna_Anas_fulvigula_D2005012…	DB Search
GEIGPAGN(+0.98)VGP(+15.99)TGPAGPR	93.09	1619.79	18	2.2	810.904	2	25.9285	13250	20201209_Lumos_Ritcher_sample148_17.raw		0	0	Deamidation (NQ);Proline Oxidation	N8:Deamidation (NQ):1000.00;P11:Proline Oxidation:12.33	AnsAna_Spatula_platalea_D2007020414.COL1a2_Anas.consensus:AnsAna_Chloephaga_rubidiceps_D2104051194.COL1a2_Anas.consensus:AnsAna_Plectropterus_gambensis_B10K-D-WWT-22.COL1a2_Anas.consensus:AnsAna_Aythya_affinis_CL200153793_L02.COL1a2_Anas.consensus:AnsAna_Somateria_spectabilis_D2006016067.COL1a2_Anas.consensus:AnsAna_Neochen_jubata_B10K-D-WWT-20.COL1a2_Anas.consensus:AnsAna_Anas_fulvigula_D2005012…	DB Search
GEIGPAGN(+0.98)VGPSGPAGPRGEIG	82.99	1945.95	22	5.5	649.661	3	25.5123	12751	20201209_Lumos_Ritcher_sample148_17.raw	935000	1	1	Deamidation (NQ)	N8:Deamidation (NQ):1000.00	AnsAna_Oxyura_jamaicensis_GCA_011077185.1.COL1a2_Anas.consensus:AnsAna_Cereopsis_novaehollandiae_B10K-D-IZW-75.COL1a2_Anas.consensus:AnsAna_Cygnus_olor_GCA_009769485.2.COL1a2_Anas.consensus:AnsAna_Stictonetta_naevosa_D2006016299.COL1a2_Anas.consensus:AnsAna_Cygnus_atratus_GCA_013377495.2.COL1a2_Anas.consensus:AnsAna_Coscoroba_coscoroba_D2102046636.COL1a2_Anas.consensus:AnsAna_Dendrocygna_autumnal…	DB Search
GEIGPAGN(+0.98)VGPT(-18.01)GPAGPR	48.5	1585.78	18	9.6	529.607	3	27.4334	14847	20201209_Lumos_Ritcher_sample148_17.raw		0	0	Deamidation (NQ);Dehydration	N8:Deamidation (NQ):1000.00;T12:Dehydration:1000.00	AnsAna_Spatula_platalea_D2007020414.COL1a2_Anas.consensus:AnsAna_Chloephaga_rubidiceps_D2104051194.COL1a2_Anas.consensus:AnsAna_Plectropterus_gambensis_B10K-D-WWT-22.COL1a2_Anas.consensus:AnsAna_Aythya_affinis_CL200153793_L02.COL1a2_Anas.consensus:AnsAna_Somateria_spectabilis_D2006016067.COL1a2_Anas.consensus:AnsAna_Neochen_jubata_B10K-D-WWT-20.COL1a2_Anas.consensus:AnsAna_Anas_fulvigula_D2005012…	PEAKS PTM
GEIGPAGN(+0.98)VGPTGP(+15.99)AGPR	84.11	1619.79	18	2.4	810.904	2	26.3412	13683	20201209_Lumos_Ritcher_sample148_17.raw		0	0	Deamidation (NQ);Proline Oxidation	N8:Deamidation (NQ):1000.00;P14:Proline Oxidation:6.63	AnsAna_Spatula_platalea_D2007020414.COL1a2_Anas.consensus:AnsAna_Chloephaga_rubidiceps_D2104051194.COL1a2_Anas.consensus:AnsAna_Plectropterus_gambensis_B10K-D-WWT-22.COL1a2_Anas.consensus:AnsAna_Aythya_affinis_CL200153793_L02.COL1a2_Anas.consensus:AnsAna_Somateria_spectabilis_D2006016067.COL1a2_Anas.consensus:AnsAna_Neochen_jubata_B10K-D-WWT-20.COL1a2_Anas.consensus:AnsAna_Anas_fulvigula_D2005012…	DB Search
GEIGPAGN(+0.98)VGPTGPAGPR	91.22	1603.8	18	0.2	802.905	2	28.1311	15607	20201209_Lumos_Ritcher_sample148_17.raw	180000000	2	2	Deamidation (NQ)	N8:Deamidation (NQ):1000.00	AnsAna_Spatula_platalea_D2007020414.COL1a2_Anas.consensus:AnsAna_Chloephaga_rubidiceps_D2104051194.COL1a2_Anas.consensus:AnsAna_Plectropterus_gambensis_B10K-D-WWT-22.COL1a2_Anas.consensus:AnsAna_Aythya_affinis_CL200153793_L02.COL1a2_Anas.consensus:AnsAna_Somateria_spectabilis_D2006016067.COL1a2_Anas.consensus:AnsAna_Neochen_jubata_B10K-D-WWT-20.COL1a2_Anas.consensus:AnsAna_Anas_fulvigula_D2005012…	DB Search
GEIGPAGNVGPT	51.18	1067.52	12	0.6	534.77	2	27.8279	15227	20201209_Lumos_Ritcher_sample148_17.raw	249000	1	1			AnsAna_Spatula_platalea_D2007020414.COL1a2_Anas.consensus:AnsAna_Chloephaga_rubidiceps_D2104051194.COL1a2_Anas.consensus:AnsAna_Plectropterus_gambensis_B10K-D-WWT-22.COL1a2_Anas.consensus:AnsAna_Aythya_affinis_CL200153793_L02.COL1a2_Anas.consensus:AnsAna_Somateria_spectabilis_D2006016067.COL1a2_Anas.consensus:AnsAna_Neochen_jubata_B10K-D-WWT-20.COL1a2_Anas.consensus:AnsAna_Anas_fulvigula_D2005012…	DB Search
GEIGPAGNVGPTGPAGPR	93.74	1602.81	18	0.1	802.413	2	27.6298	15054	20201209_Lumos_Ritcher_sample148_17.raw		0	0			AnsAna_Spatula_platalea_D2007020414.COL1a2_Anas.consensus:AnsAna_Chloephaga_rubidiceps_D2104051194.COL1a2_Anas.consensus:AnsAna_Plectropterus_gambensis_B10K-D-WWT-22.COL1a2_Anas.consensus:AnsAna_Aythya_affinis_CL200153793_L02.COL1a2_Anas.consensus:AnsAna_Somateria_spectabilis_D2006016067.COL1a2_Anas.consensus:AnsAna_Neochen_jubata_B10K-D-WWT-20.COL1a2_Anas.consensus:AnsAna_Anas_fulvigula_D2005012…	DB Search
GEP(+15.99)GAAGPP(+15.99)GP(+15.99)PGPSGEEGKR	42.24	1947.89	21	-10	974.944	2	45.8218	34031	20201209_Lumos_Ritcher_sample148_17.raw		0	0	Proline Oxidation;Proline Oxidation;Proline Oxidation	P3:Proline Oxidation:0.00;P9:Proline Oxidation:0.00;P11:Proline Oxidation:0.00	AnsAna_Amazonetta_brasiliensis_D2007020470.COL1a2_Anas.consensus	DB Search
GEP(+15.99)GN(+0.98)IGFP(+15.99)GPK	89.48	1201.56	12	0.1	601.788	2	27.8775	15384	20201209_Lumos_Ritcher_sample148_17.raw	109000000	2	2	Proline Oxidation;Deamidation (NQ);Proline Oxidation	P3:Proline Oxidation:90.72;N5:Deamidation (NQ):1000.00;P9:Proline Oxidation:14.63	AnsAna_Spatula_platalea_D2007020414.COL1a2_Anas.consensus:AnsAna_Chloephaga_rubidiceps_D2104051194.COL1a2_Anas.consensus:AnsAna_Cygnus_atratus_GCA_013377495.2.COL1a2_Anas.consensus:AnsAna_Plectropterus_gambensis_B10K-D-WWT-22.COL1a2_Anas.consensus:AnsAna_Aythya_affinis_CL200153793_L02.COL1a2_Anas.consensus:AnsAna_Somateria_spectabilis_D2006016067.COL1a2_Anas.consensus:AnsAna_Dendrocygna_guttata_B…	DB Search
GEP(+15.99)GN(+0.98)IGFPGP(+15.99)K	66.23	1201.56	12	0.4	601.788	2	29.4774	16870	20201209_Lumos_Ritcher_sample148_17.raw		0	0	Proline Oxidation;Deamidation (NQ);Proline Oxidation	P3:Proline Oxidation:56.47;N5:Deamidation (NQ):1000.00;P11:Proline Oxidation:0.00	AnsAna_Spatula_platalea_D2007020414.COL1a2_Anas.consensus:AnsAna_Chloephaga_rubidiceps_D2104051194.COL1a2_Anas.consensus:AnsAna_Cygnus_atratus_GCA_013377495.2.COL1a2_Anas.consensus:AnsAna_Plectropterus_gambensis_B10K-D-WWT-22.COL1a2_Anas.consensus:AnsAna_Aythya_affinis_CL200153793_L02.COL1a2_Anas.consensus:AnsAna_Somateria_spectabilis_D2006016067.COL1a2_Anas.consensus:AnsAna_Dendrocygna_guttata_B…	DB Search
GEP(+15.99)GN(+0.98)VGAAGGP(+15.99)GPAGPGGIP(+15.99)GER	44.86	2075.95	24	-1	1038.98	2	24.752	12122	20201209_Lumos_Ritcher_sample148_17.raw		0	0	Proline Oxidation;Deamidation (NQ);Proline Oxidation;Proline Oxidation	P3:Proline Oxidation:134.48;N5:Deamidation (NQ):1000.00;P12:Proline Oxidation:9.74;P21:Proline Oxidation:41.04	AnsAna_Alopochen_aegyptiaca_D1907004292.COL1a2_Anas.consensus:AnsAna_Oxyura_jamaicensis_GCA_011077185.1.COL1a2_Anas.consensus:AnsAna_Lophonetta_specularioides_GCA_032165235.1.COL1a2_Anas.consensus:AnsAna_Anser_brachyrhynchus_GCA_002592135.1.COL1a2_Anas.consensus:AnsAna_Mareca_falcata_D2006016302.COL1a2_Anas.consensus:AnsAna_Cygnus_olor_GCA_009769485.2.COL1a2_Anas.consensus:AnsAna_Anser_indicus_GC…	SPIDER
GEP(+15.99)GNIGFP(+15.99)GP(+15.99)K	91.89	1216.57	12	-1.3	609.293	2	26.6522	14020	20201209_Lumos_Ritcher_sample148_17.raw		0	0	Proline Oxidation;Proline Oxidation;Proline Oxidation	P3:Proline Oxidation:1000.00;P9:Proline Oxidation:1000.00;P11:Proline Oxidation:1000.00	AnsAna_Spatula_platalea_D2007020414.COL1a2_Anas.consensus:AnsAna_Chloephaga_rubidiceps_D2104051194.COL1a2_Anas.consensus:AnsAna_Cygnus_atratus_GCA_013377495.2.COL1a2_Anas.consensus:AnsAna_Plectropterus_gambensis_B10K-D-WWT-22.COL1a2_Anas.consensus:AnsAna_Aythya_affinis_CL200153793_L02.COL1a2_Anas.consensus:AnsAna_Somateria_spectabilis_D2006016067.COL1a2_Anas.consensus:AnsAna_Dendrocygna_guttata_B…	DB Search
GEP(+15.99)GNIGFP(+15.99)GPK	87.06	1200.58	12	-0.7	601.296	2	26.8062	14188	20201209_Lumos_Ritcher_sample148_17.raw		0	0	Proline Oxidation;Proline Oxidation	P3:Proline Oxidation:77.57;P9:Proline Oxidation:12.19	AnsAna_Spatula_platalea_D2007020414.COL1a2_Anas.consensus:AnsAna_Chloephaga_rubidiceps_D2104051194.COL1a2_Anas.consensus:AnsAna_Cygnus_atratus_GCA_013377495.2.COL1a2_Anas.consensus:AnsAna_Plectropterus_gambensis_B10K-D-WWT-22.COL1a2_Anas.consensus:AnsAna_Aythya_affinis_CL200153793_L02.COL1a2_Anas.consensus:AnsAna_Somateria_spectabilis_D2006016067.COL1a2_Anas.consensus:AnsAna_Dendrocygna_guttata_B…	DB Search
GEP(+15.99)GNVGAAGGP(+15.99)GPAGPGGIP(+15.99)GER	91.65	2074.97	24	-1.2	1038.49	2	24.0583	11377	20201209_Lumos_Ritcher_sample148_17.raw	7840000	1	1	Proline Oxidation;Proline Oxidation;Proline Oxidation	P3:Proline Oxidation:88.86;P12:Proline Oxidation:14.04;P21:Proline Oxidation:25.70	AnsAna_Spatula_platalea_D2007020414.COL1a2_Anas.consensus:AnsAna_Chloephaga_rubidiceps_D2104051194.COL1a2_Anas.consensus:AnsAna_Cygnus_atratus_GCA_013377495.2.COL1a2_Anas.consensus:AnsAna_Plectropterus_gambensis_B10K-D-WWT-22.COL1a2_Anas.consensus:AnsAna_Aythya_affinis_CL200153793_L02.COL1a2_Anas.consensus:AnsAna_Somateria_spectabilis_D2006016067.COL1a2_Anas.consensus:AnsAna_Dendrocygna_guttata_B…	DB Search
GEP(+15.99)GNVGAAGGPGP(+15.99)AGPGGIP(+15.99)GER	91.15	2074.97	24	0.9	1038.49	2	25.5403	12823	20201209_Lumos_Ritcher_sample148_17.raw		0	0	Proline Oxidation;Proline Oxidation;Proline Oxidation	P3:Proline Oxidation:60.15;P14:Proline Oxidation:11.10;P21:Proline Oxidation:19.86	AnsAna_Spatula_platalea_D2007020414.COL1a2_Anas.consensus:AnsAna_Chloephaga_rubidiceps_D2104051194.COL1a2_Anas.consensus:AnsAna_Cygnus_atratus_GCA_013377495.2.COL1a2_Anas.consensus:AnsAna_Plectropterus_gambensis_B10K-D-WWT-22.COL1a2_Anas.consensus:AnsAna_Aythya_affinis_CL200153793_L02.COL1a2_Anas.consensus:AnsAna_Somateria_spectabilis_D2006016067.COL1a2_Anas.consensus:AnsAna_Dendrocygna_guttata_B…	DB Search
GEP(+15.99)GPAGLP(+15.99)GPAGE	84.15	1236.56	14	-0.8	619.288	2	27.356	14911	20201209_Lumos_Ritcher_sample148_17.raw	1120000	1	1	Proline Oxidation;Proline Oxidation	P3:Proline Oxidation:10.42;P9:Proline Oxidation:48.87	AnsAna_Anas_undulata_B10K-D-IZW-61.COL1a1_Cyg-Gall.consensus:AnsAna_Aythya_americana_D2006016050.COL1a1_Cyg-Gall.consensus:AnsAna_Cereopsis_novaehollandiae_B10K-D-IZW-75.COL1a1_Cyg-Gall.consensus:AnsAna_Branta_leucopsis_DBGNRM65.COL1a1_Cyg-Gall.consensus:AnsAna_Aythya_marila_GCA_029042245.1.COL1a1_Cyg-Gall.consensus:AnsAna_Tadorna_tadorna_DBGNRM58.COL1a1_Cyg-Gall.consensus:AnsAna_Anser_cygnoides_…	DB Search
GEP(+15.99)GPAGLP(+15.99)GPAGER	92.13	1392.66	15	0	697.339	2	23.0684	10332	20201209_Lumos_Ritcher_sample148_17.raw	256000000	2	2	Proline Oxidation;Proline Oxidation	P3:Proline Oxidation:20.41;P9:Proline Oxidation:20.41	AnsAna_Anas_undulata_B10K-D-IZW-61.COL1a1_Cyg-Gall.consensus:AnsAna_Aythya_americana_D2006016050.COL1a1_Cyg-Gall.consensus:AnsAna_Cereopsis_novaehollandiae_B10K-D-IZW-75.COL1a1_Cyg-Gall.consensus:AnsAna_Branta_leucopsis_DBGNRM65.COL1a1_Cyg-Gall.consensus:AnsAna_Aythya_marila_GCA_029042245.1.COL1a1_Cyg-Gall.consensus:AnsAna_Tadorna_tadorna_DBGNRM58.COL1a1_Cyg-Gall.consensus:AnsAna_Anser_cygnoides_…	DB Search
GEP(+15.99)GPAGPK	48.56	824.403	9	0.4	413.209	2	8.8322	1935	20201209_Lumos_Ritcher_sample148_17.raw	336000	1	1	Proline Oxidation	P3:Proline Oxidation:32.28	AnsAna_Anas_undulata_B10K-D-IZW-61.COL1a1_Cyg-Gall.consensus:AnsAna_Aythya_americana_D2006016050.COL1a1_Cyg-Gall.consensus:AnsAna_Aythya_marila_GCA_029042245.1.COL1a1_Cyg-Gall.consensus:AnsAna_Anser_cygnoides_GCA_025388735.1.COL1a1_Cyg-Gall.consensus:AnsAna_Branta_hutchinsii_GCA_032270845.1.COL1a1_Cyg-Gall.consensus:AnsAna_Spatula_querquedula_GCA_032191525.1.COL1a1_Cyg-Gall.consensus:AnsAna_Aix_g…	DB Search
GEP(+15.99)GPAGVQ(+0.98)GPP(+15.99)GPAGEEG	93.23	1691.73	19	0.9	846.872	2	25.5123	12707	20201209_Lumos_Ritcher_sample148_17.raw	958000	1	1	Proline Oxidation;Deamidation (NQ);Proline Oxidation	P3:Proline Oxidation:8.18;Q9:Deamidation (NQ):1000.00;P12:Proline Oxidation:11.06	AnsAna_Anas_undulata_B10K-D-IZW-61.COL1a1_Cyg-Gall.consensus:AnsAna_Aythya_americana_D2006016050.COL1a1_Cyg-Gall.consensus:AnsAna_Cereopsis_novaehollandiae_B10K-D-IZW-75.COL1a1_Cyg-Gall.consensus:AnsAna_Branta_leucopsis_DBGNRM65.COL1a1_Cyg-Gall.consensus:AnsAna_Aythya_marila_GCA_029042245.1.COL1a1_Cyg-Gall.consensus:AnsAna_Tadorna_tadorna_DBGNRM58.COL1a1_Cyg-Gall.consensus:AnsAna_Anser_cygnoides_…	DB Search
GEP(+15.99)GPAGVQ(+0.98)GPP(+15.99)GPAGEEGK	95.1	1819.82	20	-1.2	910.917	2	22.3792	9572	20201209_Lumos_Ritcher_sample148_17.raw	210000000	2	2	Proline Oxidation;Deamidation (NQ);Proline Oxidation	P3:Proline Oxidation:25.66;Q9:Deamidation (NQ):1000.00;P12:Proline Oxidation:12.28	AnsAna_Anas_undulata_B10K-D-IZW-61.COL1a1_Cyg-Gall.consensus:AnsAna_Aythya_americana_D2006016050.COL1a1_Cyg-Gall.consensus:AnsAna_Cereopsis_novaehollandiae_B10K-D-IZW-75.COL1a1_Cyg-Gall.consensus:AnsAna_Branta_leucopsis_DBGNRM65.COL1a1_Cyg-Gall.consensus:AnsAna_Aythya_marila_GCA_029042245.1.COL1a1_Cyg-Gall.consensus:AnsAna_Tadorna_tadorna_DBGNRM58.COL1a1_Cyg-Gall.consensus:AnsAna_Anser_cygnoides_…	DB Search
GEP(+15.99)GPAGVQ(+0.98)GPP(+15.99)GPAGEEGKR	92.55	1975.92	21	-1.2	988.968	2	20.0104	7164	20201209_Lumos_Ritcher_sample148_17.raw	7300000	2	2	Proline Oxidation;Deamidation (NQ);Proline Oxidation	P3:Proline Oxidation:0.00;Q9:Deamidation (NQ):1000.00;P12:Proline Oxidation:9.40	AnsAna_Anas_undulata_B10K-D-IZW-61.COL1a1_Cyg-Gall.consensus:AnsAna_Aythya_americana_D2006016050.COL1a1_Cyg-Gall.consensus:AnsAna_Cereopsis_novaehollandiae_B10K-D-IZW-75.COL1a1_Cyg-Gall.consensus:AnsAna_Branta_leucopsis_DBGNRM65.COL1a1_Cyg-Gall.consensus:AnsAna_Aythya_marila_GCA_029042245.1.COL1a1_Cyg-Gall.consensus:AnsAna_Tadorna_tadorna_DBGNRM58.COL1a1_Cyg-Gall.consensus:AnsAna_Anser_cygnoides_…	DB Search
GEP(+15.99)GPAGVQ(+0.98)GPPGP(+15.99)AGEEGKR	54.49	1975.92	21	8.6	988.977	2	19.3063	6552	20201209_Lumos_Ritcher_sample148_17.raw		0	0	Proline Oxidation;Deamidation (NQ);Proline Oxidation	P3:Proline Oxidation:0.00;Q9:Deamidation (NQ):1000.00;P14:Proline Oxidation:0.00	AnsAna_Anas_undulata_B10K-D-IZW-61.COL1a1_Cyg-Gall.consensus:AnsAna_Aythya_americana_D2006016050.COL1a1_Cyg-Gall.consensus:AnsAna_Cereopsis_novaehollandiae_B10K-D-IZW-75.COL1a1_Cyg-Gall.consensus:AnsAna_Branta_leucopsis_DBGNRM65.COL1a1_Cyg-Gall.consensus:AnsAna_Aythya_marila_GCA_029042245.1.COL1a1_Cyg-Gall.consensus:AnsAna_Tadorna_tadorna_DBGNRM58.COL1a1_Cyg-Gall.consensus:AnsAna_Anser_cygnoides_…	DB Search
GEP(+15.99)GPAGVQGP(+15.99)PGPA	64.25	1318.62	15	0.9	660.315	2	24.041	11521	20201209_Lumos_Ritcher_sample148_17.raw	175000	1	1	Proline Oxidation;Proline Oxidation	P3:Proline Oxidation:27.16;P11:Proline Oxidation:0.00	AnsAna_Anas_undulata_B10K-D-IZW-61.COL1a1_Cyg-Gall.consensus:AnsAna_Aythya_americana_D2006016050.COL1a1_Cyg-Gall.consensus:AnsAna_Cereopsis_novaehollandiae_B10K-D-IZW-75.COL1a1_Cyg-Gall.consensus:AnsAna_Branta_leucopsis_DBGNRM65.COL1a1_Cyg-Gall.consensus:AnsAna_Aythya_marila_GCA_029042245.1.COL1a1_Cyg-Gall.consensus:AnsAna_Tadorna_tadorna_DBGNRM58.COL1a1_Cyg-Gall.consensus:AnsAna_Anser_cygnoides_…	DB Search
GEP(+15.99)GPAGVQGPP(+15.99)GPAG	74.6	1375.64	16	4.8	688.829	2	23.6293	10923	20201209_Lumos_Ritcher_sample148_17.raw		0	0	Proline Oxidation;Proline Oxidation	P3:Proline Oxidation:15.73;P12:Proline Oxidation:7.65	AnsAna_Anas_undulata_B10K-D-IZW-61.COL1a1_Cyg-Gall.consensus:AnsAna_Aythya_americana_D2006016050.COL1a1_Cyg-Gall.consensus:AnsAna_Cereopsis_novaehollandiae_B10K-D-IZW-75.COL1a1_Cyg-Gall.consensus:AnsAna_Branta_leucopsis_DBGNRM65.COL1a1_Cyg-Gall.consensus:AnsAna_Aythya_marila_GCA_029042245.1.COL1a1_Cyg-Gall.consensus:AnsAna_Tadorna_tadorna_DBGNRM58.COL1a1_Cyg-Gall.consensus:AnsAna_Anser_cygnoides_…	DB Search
GEP(+15.99)GPAGVQGPP(+15.99)GPAGEE	92.75	1633.72	18	0.7	817.869	2	24.9048	12263	20201209_Lumos_Ritcher_sample148_17.raw		0	0	Proline Oxidation;Proline Oxidation	P3:Proline Oxidation:6.59;P12:Proline Oxidation:27.96	AnsAna_Anas_undulata_B10K-D-IZW-61.COL1a1_Cyg-Gall.consensus:AnsAna_Aythya_americana_D2006016050.COL1a1_Cyg-Gall.consensus:AnsAna_Cereopsis_novaehollandiae_B10K-D-IZW-75.COL1a1_Cyg-Gall.consensus:AnsAna_Branta_leucopsis_DBGNRM65.COL1a1_Cyg-Gall.consensus:AnsAna_Aythya_marila_GCA_029042245.1.COL1a1_Cyg-Gall.consensus:AnsAna_Tadorna_tadorna_DBGNRM58.COL1a1_Cyg-Gall.consensus:AnsAna_Anser_cygnoides_…	DB Search
GEP(+15.99)GPAGVQGPP(+15.99)GPAGEEG	94.09	1690.74	19	-0.4	846.379	2	24.7063	12071	20201209_Lumos_Ritcher_sample148_17.raw		0	0	Proline Oxidation;Proline Oxidation	P3:Proline Oxidation:24.32;P12:Proline Oxidation:20.00	AnsAna_Anas_undulata_B10K-D-IZW-61.COL1a1_Cyg-Gall.consensus:AnsAna_Aythya_americana_D2006016050.COL1a1_Cyg-Gall.consensus:AnsAna_Cereopsis_novaehollandiae_B10K-D-IZW-75.COL1a1_Cyg-Gall.consensus:AnsAna_Branta_leucopsis_DBGNRM65.COL1a1_Cyg-Gall.consensus:AnsAna_Aythya_marila_GCA_029042245.1.COL1a1_Cyg-Gall.consensus:AnsAna_Tadorna_tadorna_DBGNRM58.COL1a1_Cyg-Gall.consensus:AnsAna_Anser_cygnoides_…	DB Search
GEP(+15.99)GPAGVQGPP(+15.99)GPAGEEGK	95.15	1818.84	20	-0.9	910.426	2	21.4749	8708	20201209_Lumos_Ritcher_sample148_17.raw	143000000	2	2	Proline Oxidation;Proline Oxidation	P3:Proline Oxidation:20.41;P12:Proline Oxidation:24.44	AnsAna_Anas_undulata_B10K-D-IZW-61.COL1a1_Cyg-Gall.consensus:AnsAna_Aythya_americana_D2006016050.COL1a1_Cyg-Gall.consensus:AnsAna_Cereopsis_novaehollandiae_B10K-D-IZW-75.COL1a1_Cyg-Gall.consensus:AnsAna_Branta_leucopsis_DBGNRM65.COL1a1_Cyg-Gall.consensus:AnsAna_Aythya_marila_GCA_029042245.1.COL1a1_Cyg-Gall.consensus:AnsAna_Tadorna_tadorna_DBGNRM58.COL1a1_Cyg-Gall.consensus:AnsAna_Anser_cygnoides_…	DB Search
GEP(+15.99)GPAGVQGPP(+15.99)GPAGEEGKR	93.97	1974.94	21	0	988.477	2	19.4306	6687	20201209_Lumos_Ritcher_sample148_17.raw	4340000	1	1	Proline Oxidation;Proline Oxidation	P3:Proline Oxidation:20.41;P12:Proline Oxidation:9.40	AnsAna_Anas_undulata_B10K-D-IZW-61.COL1a1_Cyg-Gall.consensus:AnsAna_Aythya_americana_D2006016050.COL1a1_Cyg-Gall.consensus:AnsAna_Cereopsis_novaehollandiae_B10K-D-IZW-75.COL1a1_Cyg-Gall.consensus:AnsAna_Branta_leucopsis_DBGNRM65.COL1a1_Cyg-Gall.consensus:AnsAna_Aythya_marila_GCA_029042245.1.COL1a1_Cyg-Gall.consensus:AnsAna_Tadorna_tadorna_DBGNRM58.COL1a1_Cyg-Gall.consensus:AnsAna_Anser_cygnoides_…	DB Search
GEP(+15.99)GPLGVSGP(+15.99)PGAR	67.35	1378.68	15	0.3	690.349	2	26.6035	13965	20201209_Lumos_Ritcher_sample148_17.raw		0	0	Proline Oxidation;Proline Oxidation	P3:Proline Oxidation:15.73;P11:Proline Oxidation:0.00	AnsAna_Spatula_platalea_D2007020414.COL1a2_Anas.consensus:AnsAna_Chloephaga_rubidiceps_D2104051194.COL1a2_Anas.consensus:AnsAna_Cygnus_atratus_GCA_013377495.2.COL1a2_Anas.consensus:AnsAna_Plectropterus_gambensis_B10K-D-WWT-22.COL1a2_Anas.consensus:AnsAna_Aythya_affinis_CL200153793_L02.COL1a2_Anas.consensus:AnsAna_Somateria_spectabilis_D2006016067.COL1a2_Anas.consensus:AnsAna_Dendrocygna_guttata_B…	DB Search
GEP(+15.99)GPLGVSGPP(+15.99)GAR	88.4	1378.68	15	1.6	690.35	2	26.0179	13349	20201209_Lumos_Ritcher_sample148_17.raw		0	0	Proline Oxidation;Proline Oxidation	P3:Proline Oxidation:52.04;P12:Proline Oxidation:8.14	AnsAna_Spatula_platalea_D2007020414.COL1a2_Anas.consensus:AnsAna_Chloephaga_rubidiceps_D2104051194.COL1a2_Anas.consensus:AnsAna_Cygnus_atratus_GCA_013377495.2.COL1a2_Anas.consensus:AnsAna_Plectropterus_gambensis_B10K-D-WWT-22.COL1a2_Anas.consensus:AnsAna_Aythya_affinis_CL200153793_L02.COL1a2_Anas.consensus:AnsAna_Somateria_spectabilis_D2006016067.COL1a2_Anas.consensus:AnsAna_Dendrocygna_guttata_B…	DB Search
GEP(+15.99)GPP(+15.99)GPAGF	91.4	1013.45	11	-0.2	507.73	2	31.3132	18341	20201209_Lumos_Ritcher_sample148_17.raw	10400000	1	1	Proline Oxidation;Proline Oxidation	P3:Proline Oxidation:40.21;P6:Proline Oxidation:30.46	AnsAna_Anas_undulata_B10K-D-IZW-61.COL1a1_Cyg-Gall.consensus:AnsAna_Aythya_americana_D2006016050.COL1a1_Cyg-Gall.consensus:AnsAna_Cereopsis_novaehollandiae_B10K-D-IZW-75.COL1a1_Cyg-Gall.consensus:AnsAna_Branta_leucopsis_DBGNRM65.COL1a1_Cyg-Gall.consensus:AnsAna_Aythya_marila_GCA_029042245.1.COL1a1_Cyg-Gall.consensus:AnsAna_Tadorna_tadorna_DBGNRM58.COL1a1_Cyg-Gall.consensus:AnsAna_Anser_cygnoides_…	DB Search
GEP(+15.99)GPP(+15.99)GPAGFA	82.12	1084.48	12	0.3	543.249	2	30.613	17867	20201209_Lumos_Ritcher_sample148_17.raw	803000	1	1	Proline Oxidation;Proline Oxidation	P3:Proline Oxidation:19.68;P6:Proline Oxidation:20.00	AnsAna_Anas_undulata_B10K-D-IZW-61.COL1a1_Cyg-Gall.consensus:AnsAna_Aythya_americana_D2006016050.COL1a1_Cyg-Gall.consensus:AnsAna_Cereopsis_novaehollandiae_B10K-D-IZW-75.COL1a1_Cyg-Gall.consensus:AnsAna_Branta_leucopsis_DBGNRM65.COL1a1_Cyg-Gall.consensus:AnsAna_Aythya_marila_GCA_029042245.1.COL1a1_Cyg-Gall.consensus:AnsAna_Tadorna_tadorna_DBGNRM58.COL1a1_Cyg-Gall.consensus:AnsAna_Anser_cygnoides_…	DB Search
GEP(+15.99)GPP(+15.99)GPAGFAGPP(+15.99)G	72.57	1408.63	16	0.9	705.321	2	29.543	17115	20201209_Lumos_Ritcher_sample148_17.raw	1050000	1	1	Proline Oxidation;Proline Oxidation;Proline Oxidation	P3:Proline Oxidation:39.76;P6:Proline Oxidation:30.46;P15:Proline Oxidation:30.46	AnsAna_Anas_undulata_B10K-D-IZW-61.COL1a1_Cyg-Gall.consensus:AnsAna_Aythya_americana_D2006016050.COL1a1_Cyg-Gall.consensus:AnsAna_Cereopsis_novaehollandiae_B10K-D-IZW-75.COL1a1_Cyg-Gall.consensus:AnsAna_Branta_leucopsis_DBGNRM65.COL1a1_Cyg-Gall.consensus:AnsAna_Aythya_marila_GCA_029042245.1.COL1a1_Cyg-Gall.consensus:AnsAna_Tadorna_tadorna_DBGNRM58.COL1a1_Cyg-Gall.consensus:AnsAna_Anser_cygnoides_…	DB Search
GEP(+15.99)GPP(+15.99)GPAGFAGPP(+15.99)GAD	84.72	1594.69	18	0.5	798.353	2	30.4319	18114	20201209_Lumos_Ritcher_sample148_17.raw	1270000	1	1	Proline Oxidation;Proline Oxidation;Proline Oxidation	P3:Proline Oxidation:13.83;P6:Proline Oxidation:6.59;P15:Proline Oxidation:27.96	AnsAna_Anas_undulata_B10K-D-IZW-61.COL1a1_Cyg-Gall.consensus:AnsAna_Aythya_americana_D2006016050.COL1a1_Cyg-Gall.consensus:AnsAna_Cereopsis_novaehollandiae_B10K-D-IZW-75.COL1a1_Cyg-Gall.consensus:AnsAna_Aythya_marila_GCA_029042245.1.COL1a1_Cyg-Gall.consensus:AnsAna_Tadorna_tadorna_DBGNRM58.COL1a1_Cyg-Gall.consensus:AnsAna_Anser_cygnoides_GCA_025388735.1.COL1a1_Cyg-Gall.consensus:AnsAna_Branta_hut…	DB Search
GEP(+15.99)GPP(+15.99)GPAGFAGPP(+15.99)GADGQP(+15.99)GAK	44.52	2148.97	24	0.1	1075.49	2	26.3191	13668	20201209_Lumos_Ritcher_sample148_17.raw		0	0	Proline Oxidation;Proline Oxidation;Proline Oxidation;Proline Oxidation	P3:Proline Oxidation:22.87;P6:Proline Oxidation:23.10;P15:Proline Oxidation:23.10;P21:Proline Oxidation:86.63	AnsAna_Spatula_discors_GCA_032165275.1.COL1a1_Cyg-Gall.consensus:AnsAna_Anas_platyrhynchos_GCA_015476345.1.COL1a1_Cyg-Gall.consensus:AnsAna_Mareca_sibilatrix_GCA_034783215.1.COL1a1_Cyg-Gall.consensus:AnsAna_Cereopsis_novaehollandiae_B10K-D-IZW-75.COL1a1_Cyg-Gall.consensus:AnsAna_Tachyeres_brachypterus_GCA_032357605.1.COL1a1_Cyg-Gall.consensus:AnsAna_Aythya_marila_GCA_029042245.1.COL1a1_Cyg-Gall.c…	SPIDER
GEP(+15.99)GPVGPSGF	90.74	1015.46	11	-0.2	508.738	2	33.8647	21617	20201209_Lumos_Ritcher_sample148_17.raw	5250000	1	1	Proline Oxidation	P3:Proline Oxidation:28.86	AnsAna_Spatula_platalea_D2007020414.COL1a2_Anas.consensus:AnsAna_Chloephaga_rubidiceps_D2104051194.COL1a2_Anas.consensus:AnsAna_Cygnus_atratus_GCA_013377495.2.COL1a2_Anas.consensus:AnsAna_Plectropterus_gambensis_B10K-D-WWT-22.COL1a2_Anas.consensus:AnsAna_Aythya_affinis_CL200153793_L02.COL1a2_Anas.consensus:AnsAna_Somateria_spectabilis_D2006016067.COL1a2_Anas.consensus:AnsAna_Dendrocygna_guttata_B…	DB Search
GEP(+15.99)GPVGPSGFA	76.64	1086.5	12	0.3	544.257	2	32.9788	20591	20201209_Lumos_Ritcher_sample148_17.raw		0	0	Proline Oxidation	P3:Proline Oxidation:15.73	AnsAna_Spatula_platalea_D2007020414.COL1a2_Anas.consensus:AnsAna_Chloephaga_rubidiceps_D2104051194.COL1a2_Anas.consensus:AnsAna_Cygnus_atratus_GCA_013377495.2.COL1a2_Anas.consensus:AnsAna_Plectropterus_gambensis_B10K-D-WWT-22.COL1a2_Anas.consensus:AnsAna_Aythya_affinis_CL200153793_L02.COL1a2_Anas.consensus:AnsAna_Somateria_spectabilis_D2006016067.COL1a2_Anas.consensus:AnsAna_Dendrocygna_guttata_B…	DB Search
GEP(+15.99)GPVGPSGFAG	47.2	1143.52	13	-0.9	572.767	2	31.8645	19267	20201209_Lumos_Ritcher_sample148_17.raw	301000	1	1	Proline Oxidation	P3:Proline Oxidation:0.00	AnsAna_Spatula_platalea_D2007020414.COL1a2_Anas.consensus:AnsAna_Chloephaga_rubidiceps_D2104051194.COL1a2_Anas.consensus:AnsAna_Cygnus_atratus_GCA_013377495.2.COL1a2_Anas.consensus:AnsAna_Plectropterus_gambensis_B10K-D-WWT-22.COL1a2_Anas.consensus:AnsAna_Aythya_affinis_CL200153793_L02.COL1a2_Anas.consensus:AnsAna_Somateria_spectabilis_D2006016067.COL1a2_Anas.consensus:AnsAna_Dendrocygna_guttata_B…	DB Search
GEP(+15.99)GPVGPSGFAGPP(+15.99)G	58.72	1410.64	16	-0.2	706.328	2	31.7975	19319	20201209_Lumos_Ritcher_sample148_17.raw		0	0	Proline Oxidation;Proline Oxidation	P3:Proline Oxidation:5.99;P15:Proline Oxidation:17.01	AnsAna_Spatula_platalea_D2007020414.COL1a2_Anas.consensus:AnsAna_Chloephaga_rubidiceps_D2104051194.COL1a2_Anas.consensus:AnsAna_Cygnus_atratus_GCA_013377495.2.COL1a2_Anas.consensus:AnsAna_Plectropterus_gambensis_B10K-D-WWT-22.COL1a2_Anas.consensus:AnsAna_Aythya_affinis_CL200153793_L02.COL1a2_Anas.consensus:AnsAna_Somateria_spectabilis_D2006016067.COL1a2_Anas.consensus:AnsAna_Dendrocygna_guttata_B…	DB Search
GEP(+15.99)GPVGPSGFAGPP(+15.99)GA	74.97	1481.68	17	0.5	741.847	2	33.7353	21368	20201209_Lumos_Ritcher_sample148_17.raw	101000	1	1	Proline Oxidation;Proline Oxidation	P3:Proline Oxidation:26.31;P15:Proline Oxidation:14.02	AnsAna_Spatula_platalea_D2007020414.COL1a2_Anas.consensus:AnsAna_Chloephaga_rubidiceps_D2104051194.COL1a2_Anas.consensus:AnsAna_Cygnus_atratus_GCA_013377495.2.COL1a2_Anas.consensus:AnsAna_Plectropterus_gambensis_B10K-D-WWT-22.COL1a2_Anas.consensus:AnsAna_Aythya_affinis_CL200153793_L02.COL1a2_Anas.consensus:AnsAna_Somateria_spectabilis_D2006016067.COL1a2_Anas.consensus:AnsAna_Dendrocygna_guttata_B…	DB Search
GEP(+15.99)GPVGPSGFAGPP(+15.99)GAA	97.07	1552.72	18	-0.4	777.365	2	32.9813	20594	20201209_Lumos_Ritcher_sample148_17.raw		0	0	Proline Oxidation;Proline Oxidation	P3:Proline Oxidation:8.18;P15:Proline Oxidation:7.21	AnsAna_Spatula_platalea_D2007020414.COL1a2_Anas.consensus:AnsAna_Chloephaga_rubidiceps_D2104051194.COL1a2_Anas.consensus:AnsAna_Cygnus_atratus_GCA_013377495.2.COL1a2_Anas.consensus:AnsAna_Plectropterus_gambensis_B10K-D-WWT-22.COL1a2_Anas.consensus:AnsAna_Aythya_affinis_CL200153793_L02.COL1a2_Anas.consensus:AnsAna_Somateria_spectabilis_D2006016067.COL1a2_Anas.consensus:AnsAna_Dendrocygna_guttata_B…	DB Search
GEP(+15.99)GPVGPSGFAGPP(+15.99)GAAGQ(+0.98)	64.42	1738.78	20	1.9	870.399	2	32.9552	20422	20201209_Lumos_Ritcher_sample148_17.raw	53200	1	1	Proline Oxidation;Proline Oxidation;Deamidation (NQ)	P3:Proline Oxidation:9.40;P15:Proline Oxidation:12.28;Q20:Deamidation (NQ):1000.00	AnsAna_Spatula_platalea_D2007020414.COL1a2_Anas.consensus:AnsAna_Chloephaga_rubidiceps_D2104051194.COL1a2_Anas.consensus:AnsAna_Cygnus_atratus_GCA_013377495.2.COL1a2_Anas.consensus:AnsAna_Plectropterus_gambensis_B10K-D-WWT-22.COL1a2_Anas.consensus:AnsAna_Aythya_affinis_CL200153793_L02.COL1a2_Anas.consensus:AnsAna_Somateria_spectabilis_D2006016067.COL1a2_Anas.consensus:AnsAna_Dendrocygna_guttata_B…	DB Search
GEP(+15.99)GPVGPSGFAGPP(+15.99)GAAGQ(+0.98)P(+15.99)GAK	43.69	2107.98	24	0.8	1055	2	28.7066	16082	20201209_Lumos_Ritcher_sample148_17.raw	92100000	1	1	Proline Oxidation;Proline Oxidation;Deamidation (NQ);Proline Oxidation	P3:Proline Oxidation:25.66;P15:Proline Oxidation:23.10;Q20:Deamidation (NQ):1000.00;P21:Proline Oxidation:70.39	AnsAna_Alopochen_aegyptiaca_D1907004292.COL1a2_Anas.consensus:AnsAna_Oxyura_jamaicensis_GCA_011077185.1.COL1a2_Anas.consensus:AnsAna_Lophonetta_specularioides_GCA_032165235.1.COL1a2_Anas.consensus:AnsAna_Anser_brachyrhynchus_GCA_002592135.1.COL1a2_Anas.consensus:AnsAna_Mareca_falcata_D2006016302.COL1a2_Anas.consensus:AnsAna_Cygnus_olor_GCA_009769485.2.COL1a2_Anas.consensus:AnsAna_Anser_indicus_GC…	SPIDER
GEP(+15.99)GPVGPSGFAGPP(+15.99)GAAGQP(+15.99)GAK	95.67	2107	24	0.4	703.34	3	27.9322	15385	20201209_Lumos_Ritcher_sample148_17.raw		0	0	Proline Oxidation;Proline Oxidation;Proline Oxidation	P3:Proline Oxidation:12.81;P15:Proline Oxidation:23.10;P21:Proline Oxidation:46.67	AnsAna_Spatula_platalea_D2007020414.COL1a2_Anas.consensus:AnsAna_Chloephaga_rubidiceps_D2104051194.COL1a2_Anas.consensus:AnsAna_Cygnus_atratus_GCA_013377495.2.COL1a2_Anas.consensus:AnsAna_Plectropterus_gambensis_B10K-D-WWT-22.COL1a2_Anas.consensus:AnsAna_Aythya_affinis_CL200153793_L02.COL1a2_Anas.consensus:AnsAna_Somateria_spectabilis_D2006016067.COL1a2_Anas.consensus:AnsAna_Dendrocygna_guttata_B…	DB Search
GEP(+15.99)GPVGPSGFAGPP(+15.99)GAAGQPGC(sub A)KGER	41.75	2465.14	27	7.1	822.726	3	25.7483	13109	20201209_Lumos_Ritcher_sample148_17.raw	26300000	1	1	Proline Oxidation;Proline Oxidation;Ala->Cys substitution	P3:Proline Oxidation:18.53;P15:Proline Oxidation:17.01	AnsAna_Alopochen_aegyptiaca_D1907004292.COL1a2_Anas.consensus:AnsAna_Oxyura_jamaicensis_GCA_011077185.1.COL1a2_Anas.consensus:AnsAna_Lophonetta_specularioides_GCA_032165235.1.COL1a2_Anas.consensus:AnsAna_Anser_brachyrhynchus_GCA_002592135.1.COL1a2_Anas.consensus:AnsAna_Mareca_falcata_D2006016302.COL1a2_Anas.consensus:AnsAna_Cygnus_olor_GCA_009769485.2.COL1a2_Anas.consensus:AnsAna_Anser_indicus_GC…	SPIDER
GEPGNVGAAGGP(+15.99)GPAGPGGIP(+15.99)GER	91.19	2058.97	24	-0.9	687.331	3	25.5993	13013	20201209_Lumos_Ritcher_sample148_17.raw	338000	1	1	Proline Oxidation;Proline Oxidation	P12:Proline Oxidation:7.81;P21:Proline Oxidation:16.51	AnsAna_Spatula_platalea_D2007020414.COL1a2_Anas.consensus:AnsAna_Chloephaga_rubidiceps_D2104051194.COL1a2_Anas.consensus:AnsAna_Cygnus_atratus_GCA_013377495.2.COL1a2_Anas.consensus:AnsAna_Plectropterus_gambensis_B10K-D-WWT-22.COL1a2_Anas.consensus:AnsAna_Aythya_affinis_CL200153793_L02.COL1a2_Anas.consensus:AnsAna_Somateria_spectabilis_D2006016067.COL1a2_Anas.consensus:AnsAna_Dendrocygna_guttata_B…	DB Search
GEPGP(+15.99)AGVQ(+0.98)GPP(+15.99)GPAG	87.67	1376.62	16	-0.1	689.318	2	24.5461	11949	20201209_Lumos_Ritcher_sample148_17.raw	529000	1	1	Proline Oxidation;Deamidation (NQ);Proline Oxidation	P5:Proline Oxidation:27.95;Q9:Deamidation (NQ):1000.00;P12:Proline Oxidation:8.69	AnsAna_Anas_undulata_B10K-D-IZW-61.COL1a1_Cyg-Gall.consensus:AnsAna_Aythya_americana_D2006016050.COL1a1_Cyg-Gall.consensus:AnsAna_Cereopsis_novaehollandiae_B10K-D-IZW-75.COL1a1_Cyg-Gall.consensus:AnsAna_Branta_leucopsis_DBGNRM65.COL1a1_Cyg-Gall.consensus:AnsAna_Aythya_marila_GCA_029042245.1.COL1a1_Cyg-Gall.consensus:AnsAna_Tadorna_tadorna_DBGNRM58.COL1a1_Cyg-Gall.consensus:AnsAna_Anser_cygnoides_…	DB Search
GEPGP(+15.99)AGVQ(+0.98)GPP(+15.99)GPAGEEGKR	88.55	1975.92	21	-0.7	659.648	3	20.0963	7274	20201209_Lumos_Ritcher_sample148_17.raw	7210000	1	1	Proline Oxidation;Deamidation (NQ);Proline Oxidation	P5:Proline Oxidation:4.64;Q9:Deamidation (NQ):1000.00;P12:Proline Oxidation:10.11	AnsAna_Anas_undulata_B10K-D-IZW-61.COL1a1_Cyg-Gall.consensus:AnsAna_Aythya_americana_D2006016050.COL1a1_Cyg-Gall.consensus:AnsAna_Cereopsis_novaehollandiae_B10K-D-IZW-75.COL1a1_Cyg-Gall.consensus:AnsAna_Branta_leucopsis_DBGNRM65.COL1a1_Cyg-Gall.consensus:AnsAna_Aythya_marila_GCA_029042245.1.COL1a1_Cyg-Gall.consensus:AnsAna_Tadorna_tadorna_DBGNRM58.COL1a1_Cyg-Gall.consensus:AnsAna_Anser_cygnoides_…	DB Search
GEPGP(+15.99)P(+15.99)GPAGFAGPP(+15.99)GAD	66.49	1594.69	18	-3	798.35	2	30.8065	18235	20201209_Lumos_Ritcher_sample148_17.raw		0	0	Proline Oxidation;Proline Oxidation;Proline Oxidation	P5:Proline Oxidation:0.00;P6:Proline Oxidation:6.59;P15:Proline Oxidation:9.34	AnsAna_Anas_undulata_B10K-D-IZW-61.COL1a1_Cyg-Gall.consensus:AnsAna_Aythya_americana_D2006016050.COL1a1_Cyg-Gall.consensus:AnsAna_Cereopsis_novaehollandiae_B10K-D-IZW-75.COL1a1_Cyg-Gall.consensus:AnsAna_Aythya_marila_GCA_029042245.1.COL1a1_Cyg-Gall.consensus:AnsAna_Tadorna_tadorna_DBGNRM58.COL1a1_Cyg-Gall.consensus:AnsAna_Anser_cygnoides_GCA_025388735.1.COL1a1_Cyg-Gall.consensus:AnsAna_Branta_hut…	DB Search
GEPGPAGLP(+15.99)GPAGER	92.61	1376.67	15	-0.3	689.341	2	24.7071	12072	20201209_Lumos_Ritcher_sample148_17.raw		0	0	Proline Oxidation	P9:Proline Oxidation:8.64	AnsAna_Anas_undulata_B10K-D-IZW-61.COL1a1_Cyg-Gall.consensus:AnsAna_Aythya_americana_D2006016050.COL1a1_Cyg-Gall.consensus:AnsAna_Cereopsis_novaehollandiae_B10K-D-IZW-75.COL1a1_Cyg-Gall.consensus:AnsAna_Branta_leucopsis_DBGNRM65.COL1a1_Cyg-Gall.consensus:AnsAna_Aythya_marila_GCA_029042245.1.COL1a1_Cyg-Gall.consensus:AnsAna_Tadorna_tadorna_DBGNRM58.COL1a1_Cyg-Gall.consensus:AnsAna_Anser_cygnoides_…	DB Search
GEPGPAGVQ(+0.98)GPP(+15.99)GPAGEEGK	92.68	1803.83	20	-1.1	602.282	3	23.3908	10669	20201209_Lumos_Ritcher_sample148_17.raw		0	0	Deamidation (NQ);Proline Oxidation	Q9:Deamidation (NQ):1000.00;P12:Proline Oxidation:12.28	AnsAna_Anas_undulata_B10K-D-IZW-61.COL1a1_Cyg-Gall.consensus:AnsAna_Aythya_americana_D2006016050.COL1a1_Cyg-Gall.consensus:AnsAna_Cereopsis_novaehollandiae_B10K-D-IZW-75.COL1a1_Cyg-Gall.consensus:AnsAna_Branta_leucopsis_DBGNRM65.COL1a1_Cyg-Gall.consensus:AnsAna_Aythya_marila_GCA_029042245.1.COL1a1_Cyg-Gall.consensus:AnsAna_Tadorna_tadorna_DBGNRM58.COL1a1_Cyg-Gall.consensus:AnsAna_Anser_cygnoides_…	DB Search
GEPGPAGVQ(+0.98)GPP(+15.99)GPAGEEGKR	87.09	1959.93	21	8.6	654.322	3	20.3803	7530	20201209_Lumos_Ritcher_sample148_17.raw	794000	1	1	Deamidation (NQ);Proline Oxidation	Q9:Deamidation (NQ):1000.00;P12:Proline Oxidation:17.01	AnsAna_Anas_undulata_B10K-D-IZW-61.COL1a1_Cyg-Gall.consensus:AnsAna_Aythya_americana_D2006016050.COL1a1_Cyg-Gall.consensus:AnsAna_Cereopsis_novaehollandiae_B10K-D-IZW-75.COL1a1_Cyg-Gall.consensus:AnsAna_Branta_leucopsis_DBGNRM65.COL1a1_Cyg-Gall.consensus:AnsAna_Aythya_marila_GCA_029042245.1.COL1a1_Cyg-Gall.consensus:AnsAna_Tadorna_tadorna_DBGNRM58.COL1a1_Cyg-Gall.consensus:AnsAna_Anser_cygnoides_…	DB Search
GEPGPAGVQGPP(+15.99)GPAGEEGK	91.01	1802.84	20	-0.5	601.955	3	22.5278	9685	20201209_Lumos_Ritcher_sample148_17.raw	2660000	2	2	Proline Oxidation	P12:Proline Oxidation:17.01	AnsAna_Anas_undulata_B10K-D-IZW-61.COL1a1_Cyg-Gall.consensus:AnsAna_Aythya_americana_D2006016050.COL1a1_Cyg-Gall.consensus:AnsAna_Cereopsis_novaehollandiae_B10K-D-IZW-75.COL1a1_Cyg-Gall.consensus:AnsAna_Branta_leucopsis_DBGNRM65.COL1a1_Cyg-Gall.consensus:AnsAna_Aythya_marila_GCA_029042245.1.COL1a1_Cyg-Gall.consensus:AnsAna_Tadorna_tadorna_DBGNRM58.COL1a1_Cyg-Gall.consensus:AnsAna_Anser_cygnoides_…	DB Search
GEPGPAGVQGPP(+15.99)GPAGEEGKR	89.14	1958.94	21	-0.6	653.988	3	20.4703	7568	20201209_Lumos_Ritcher_sample148_17.raw	144000	1	1	Proline Oxidation	P12:Proline Oxidation:11.06	AnsAna_Anas_undulata_B10K-D-IZW-61.COL1a1_Cyg-Gall.consensus:AnsAna_Aythya_americana_D2006016050.COL1a1_Cyg-Gall.consensus:AnsAna_Cereopsis_novaehollandiae_B10K-D-IZW-75.COL1a1_Cyg-Gall.consensus:AnsAna_Branta_leucopsis_DBGNRM65.COL1a1_Cyg-Gall.consensus:AnsAna_Aythya_marila_GCA_029042245.1.COL1a1_Cyg-Gall.consensus:AnsAna_Tadorna_tadorna_DBGNRM58.COL1a1_Cyg-Gall.consensus:AnsAna_Anser_cygnoides_…	DB Search
GEQGPAGAP(+15.99)GFQGLP(+15.99)GPAGPP(+15.99)GE	45.25	2091.95	23	-3	698.322	3	35.4689	23076	20201209_Lumos_Ritcher_sample148_17.raw		0	0	Proline Oxidation;Proline Oxidation;Proline Oxidation	P9:Proline Oxidation:3.13;P15:Proline Oxidation:0.00;P21:Proline Oxidation:17.01	AnsAna_Anas_undulata_B10K-D-IZW-61.COL1a1_Cyg-Gall.consensus:AnsAna_Aythya_americana_D2006016050.COL1a1_Cyg-Gall.consensus:AnsAna_Cereopsis_novaehollandiae_B10K-D-IZW-75.COL1a1_Cyg-Gall.consensus:AnsAna_Branta_leucopsis_DBGNRM65.COL1a1_Cyg-Gall.consensus:AnsAna_Aythya_marila_GCA_029042245.1.COL1a1_Cyg-Gall.consensus:AnsAna_Tadorna_tadorna_DBGNRM58.COL1a1_Cyg-Gall.consensus:AnsAna_Anser_cygnoides_…	DB Search
GEQGPAGAP(+15.99)GFQGLP(+15.99)GPAGPP(+15.99)GEAG	80.54	2220.01	25	0.5	741.01	3	35.206	22770	20201209_Lumos_Ritcher_sample148_17.raw	307000	1	1	Proline Oxidation;Proline Oxidation;Proline Oxidation	P9:Proline Oxidation:8.26;P15:Proline Oxidation:5.99;P21:Proline Oxidation:17.01	AnsAna_Anas_undulata_B10K-D-IZW-61.COL1a1_Cyg-Gall.consensus:AnsAna_Aythya_americana_D2006016050.COL1a1_Cyg-Gall.consensus:AnsAna_Cereopsis_novaehollandiae_B10K-D-IZW-75.COL1a1_Cyg-Gall.consensus:AnsAna_Branta_leucopsis_DBGNRM65.COL1a1_Cyg-Gall.consensus:AnsAna_Aythya_marila_GCA_029042245.1.COL1a1_Cyg-Gall.consensus:AnsAna_Tadorna_tadorna_DBGNRM58.COL1a1_Cyg-Gall.consensus:AnsAna_Anser_cygnoides_…	DB Search
GERGEP(+15.99)GPVGPSGFAGPP(+15.99)GAAGQP(+15.99)GAK	103.88	2449.16	27	3.1	817.397	3	25.6714	13387	20201209_Lumos_Ritcher_sample148_17.raw	1360000	1	1	Proline Oxidation;Proline Oxidation;Proline Oxidation	P6:Proline Oxidation:6.59;P18:Proline Oxidation:7.21;P24:Proline Oxidation:6.08	AnsAna_Spatula_platalea_D2007020414.COL1a2_Anas.consensus:AnsAna_Chloephaga_rubidiceps_D2104051194.COL1a2_Anas.consensus:AnsAna_Cygnus_atratus_GCA_013377495.2.COL1a2_Anas.consensus:AnsAna_Plectropterus_gambensis_B10K-D-WWT-22.COL1a2_Anas.consensus:AnsAna_Aythya_affinis_CL200153793_L02.COL1a2_Anas.consensus:AnsAna_Somateria_spectabilis_D2006016067.COL1a2_Anas.consensus:AnsAna_Dendrocygna_guttata_B…	DB Search
GERGFP(+15.99)GLP(+15.99)GPSGEPGK	60.56	1669.81	17	0	557.609	3	28.0762	15490	20201209_Lumos_Ritcher_sample148_17.raw	162000	1	1	Proline Oxidation;Proline Oxidation	P6:Proline Oxidation:39.44;P9:Proline Oxidation:14.04	AnsAna_Anas_undulata_B10K-D-IZW-61.COL1a1_Cyg-Gall.consensus:AnsAna_Aythya_americana_D2006016050.COL1a1_Cyg-Gall.consensus:AnsAna_Cereopsis_novaehollandiae_B10K-D-IZW-75.COL1a1_Cyg-Gall.consensus:AnsAna_Branta_leucopsis_DBGNRM65.COL1a1_Cyg-Gall.consensus:AnsAna_Aythya_marila_GCA_029042245.1.COL1a1_Cyg-Gall.consensus:AnsAna_Tadorna_tadorna_DBGNRM58.COL1a1_Cyg-Gall.consensus:AnsAna_Anser_cygnoides_…	DB Search
GERGLP(+15.99)GISGATGEP(+15.99)GPLGVSGP(+15.99)PGAR	104.73	2490.25	27	-1.3	831.088	3	33.798	21391	20201209_Lumos_Ritcher_sample148_17.raw		0	0	Proline Oxidation;Proline Oxidation;Proline Oxidation	P6:Proline Oxidation:20.62;P15:Proline Oxidation:7.32;P23:Proline Oxidation:0.00	AnsAna_Spatula_platalea_D2007020414.COL1a2_Anas.consensus:AnsAna_Chloephaga_rubidiceps_D2104051194.COL1a2_Anas.consensus:AnsAna_Cygnus_atratus_GCA_013377495.2.COL1a2_Anas.consensus:AnsAna_Plectropterus_gambensis_B10K-D-WWT-22.COL1a2_Anas.consensus:AnsAna_Aythya_affinis_CL200153793_L02.COL1a2_Anas.consensus:AnsAna_Somateria_spectabilis_D2006016067.COL1a2_Anas.consensus:AnsAna_Dendrocygna_guttata_B…	DB Search
GERGPA(sub P)GESGAVGPAGPIGSR	43.43	1877.93	21	-6	626.982	3	22.5275	9632	20201209_Lumos_Ritcher_sample148_17.raw	1370000	1	1	Pro->Ala substitution		AnsAna_Alopochen_aegyptiaca_D1907004292.COL1a2_Anas.consensus:AnsAna_Oxyura_jamaicensis_GCA_011077185.1.COL1a2_Anas.consensus:AnsAna_Lophonetta_specularioides_GCA_032165235.1.COL1a2_Anas.consensus:AnsAna_Anser_brachyrhynchus_GCA_002592135.1.COL1a2_Anas.consensus:AnsAna_Mareca_falcata_D2006016302.COL1a2_Anas.consensus:AnsAna_Cygnus_olor_GCA_009769485.2.COL1a2_Anas.consensus:AnsAna_Anser_indicus_GC…	SPIDER
GERGPP(+15.99)GESGAVGPAGPIGSR	92.02	1919.94	21	0.1	640.989	3	23.0141	10010	20201209_Lumos_Ritcher_sample148_17.raw	1650000	1	1	Proline Oxidation	P6:Proline Oxidation:7.65	AnsAna_Spatula_platalea_D2007020414.COL1a2_Anas.consensus:AnsAna_Chloephaga_rubidiceps_D2104051194.COL1a2_Anas.consensus:AnsAna_Cygnus_atratus_GCA_013377495.2.COL1a2_Anas.consensus:AnsAna_Plectropterus_gambensis_B10K-D-WWT-22.COL1a2_Anas.consensus:AnsAna_Aythya_affinis_CL200153793_L02.COL1a2_Anas.consensus:AnsAna_Somateria_spectabilis_D2006016067.COL1a2_Anas.consensus:AnsAna_Dendrocygna_guttata_B…	DB Search
GERGPP(+15.99)GP(+15.99)MGPPGLAGPP(+15.99)GEAGR	92.27	2158.02	23	-0.2	720.348	3	24.7949	12081	20201209_Lumos_Ritcher_sample148_17.raw	374000	1	1	Proline Oxidation;Proline Oxidation;Proline Oxidation	P6:Proline Oxidation:7.65;P8:Proline Oxidation:19.27;P18:Proline Oxidation:8.14	AnsAna_Anas_undulata_B10K-D-IZW-61.COL1a1_Cyg-Gall.consensus:AnsAna_Aythya_americana_D2006016050.COL1a1_Cyg-Gall.consensus:AnsAna_Pteronetta_hartlaubii_D2102046034.COL1a1_Cyg-Gall.consensus:AnsAna_Cereopsis_novaehollandiae_B10K-D-IZW-75.COL1a1_Cyg-Gall.consensus:AnsAna_Branta_leucopsis_DBGNRM65.COL1a1_Cyg-Gall.consensus:AnsAna_Aythya_marila_GCA_029042245.1.COL1a1_Cyg-Gall.consensus:AnsAna_Tadorna…	DB Search
GERGPPGPMGPP(+15.99)GLAGPP(+15.99)GEAGR	92.05	2142.03	23	0.5	715.017	3	23.7139	11021	20201209_Lumos_Ritcher_sample148_17.raw		0	0	Proline Oxidation;Proline Oxidation	P12:Proline Oxidation:17.01;P18:Proline Oxidation:14.02	AnsAna_Anas_undulata_B10K-D-IZW-61.COL1a1_Cyg-Gall.consensus:AnsAna_Aythya_americana_D2006016050.COL1a1_Cyg-Gall.consensus:AnsAna_Pteronetta_hartlaubii_D2102046034.COL1a1_Cyg-Gall.consensus:AnsAna_Cereopsis_novaehollandiae_B10K-D-IZW-75.COL1a1_Cyg-Gall.consensus:AnsAna_Branta_leucopsis_DBGNRM65.COL1a1_Cyg-Gall.consensus:AnsAna_Aythya_marila_GCA_029042245.1.COL1a1_Cyg-Gall.consensus:AnsAna_Tadorna…	DB Search
GETGDAGAK	90.55	804.361	9	0.2	403.188	2	8.7179	1810	20201209_Lumos_Ritcher_sample148_17.raw		0	0			AnsAna_Anas_undulata_B10K-D-IZW-61.COL1a1_Cyg-Gall.consensus:AnsAna_Cereopsis_novaehollandiae_B10K-D-IZW-75.COL1a1_Cyg-Gall.consensus:AnsAna_Aythya_marila_GCA_029042245.1.COL1a1_Cyg-Gall.consensus:AnsAna_Tadorna_tadorna_DBGNRM58.COL1a1_Cyg-Gall.consensus:AnsAna_Anser_cygnoides_GCA_025388735.1.COL1a1_Cyg-Gall.consensus:AnsAna_Branta_hutchinsii_GCA_032270845.1.COL1a1_Cyg-Gall.consensus:AnsAna_Spatu…	DB Search
GETGDAGAKGDAGPP(+15.99)GPAGPTGAP(+15.99)GPAGAVGAP(+15.99)GP(+15.99)K	44.18	3027.42	36	0.7	1010.15	3	22.483	9477	20201209_Lumos_Ritcher_sample148_17.raw	14000000	1	1	Proline Oxidation;Proline Oxidation;Proline Oxidation;Proline Oxidation	P15:Proline Oxidation:30.46;P24:Proline Oxidation:22.85;P33:Proline Oxidation:71.72;P35:Proline Oxidation:76.18	AnsAna_Mareca_sibilatrix_GCA_034783215.1.COL1a1_Cyg-Gall.consensus:AnsAna_Cereopsis_novaehollandiae_B10K-D-IZW-75.COL1a1_Cyg-Gall.consensus:AnsAna_Tachyeres_brachypterus_GCA_032357605.1.COL1a1_Cyg-Gall.consensus:AnsAna_Aythya_marila_GCA_029042245.1.COL1a1_Cyg-Gall.consensus:AnsAna_Anser_cygnoides_GCA_025388735.1.COL1a1_Cyg-Gall.consensus:AnsAna_Dendrocygna_guttata_B10K-D-IZW-85.COL1a1_Cyg-Gall.co…	SPIDER
GETGDAGAKGDAGPP(+15.99)GPAGPTGAP(+15.99)GPAGAVGAP(+15.99)GPK	91.66	3011.42	36	1	1004.82	3	22.538	9745	20201209_Lumos_Ritcher_sample148_17.raw	3170000	1	1	Proline Oxidation;Proline Oxidation;Proline Oxidation	P15:Proline Oxidation:30.46;P24:Proline Oxidation:22.85;P33:Proline Oxidation:6.59	AnsAna_Anas_undulata_B10K-D-IZW-61.COL1a1_Cyg-Gall.consensus:AnsAna_Cereopsis_novaehollandiae_B10K-D-IZW-75.COL1a1_Cyg-Gall.consensus:AnsAna_Aythya_marila_GCA_029042245.1.COL1a1_Cyg-Gall.consensus:AnsAna_Tadorna_tadorna_DBGNRM58.COL1a1_Cyg-Gall.consensus:AnsAna_Anser_cygnoides_GCA_025388735.1.COL1a1_Cyg-Gall.consensus:AnsAna_Branta_hutchinsii_GCA_032270845.1.COL1a1_Cyg-Gall.consensus:AnsAna_Spatu…	DB Search
GETGP(+15.99)TGAIGPIGASGPP(+15.99)GPAGAAGPAGPR	105.04	2526.25	30	-0.3	843.089	3	32.7935	19799	20201209_Lumos_Ritcher_sample148_17.raw	26100000	1	1	Proline Oxidation;Proline Oxidation	P5:Proline Oxidation:0.00;P18:Proline Oxidation:14.02	AnsAna_Lophodytes_cucullatus_B10K-D-WWT-15.COL1a2_Anas.consensus:AnsAna_Spatula_platalea_D2007020414.COL1a2_Anas.consensus:AnsAna_Spatula_smithii_GCA_035221675.1.COL1a2_Anas.consensus:AnsAna_Anas_gibberifrons_D2007020344.COL1a2_Anas.consensus:AnsAna_Aythya_baeri_GCA_026413565.1.COL1a2_Anas.consensus:AnsAna_Cyanochen_cyanoptera_B10K-D-WWT-10.COL1a2_Anas.consensus:AnsAna_Plectropterus_gambensis_B10…	DB Search
GETGPAGP(+15.99)PGFQ(+0.98)GLP(+15.99)GPSGPAGEAGK	85.02	2322.08	26	0.9	775.033	3	34.4237	21602	20201209_Lumos_Ritcher_sample148_17.raw	4420000	1	1	Proline Oxidation;Deamidation (NQ);Proline Oxidation	P8:Proline Oxidation:0.00;Q12:Deamidation (NQ):1000.00;P15:Proline Oxidation:32.28	AnsAna_Mareca_penelope_GCA_036026335.1.COL1a2_Anas.consensus:sp|P02467|CO1A2_CHICK:AnsAna_Mareca_strepera_DBGNRM54.COL1a2_Anas.consensus:AnsAna_Mareca_strepera_GCA_035583915.1.COL1a2_Anas.consensus:AnsAna_Mareca_falcata_D2006016302.COL1a2_Anas.consensus:AnsAna_Mareca_sibilatrix_GCA_034783215.1.COL1a2_Anas.consensus:AnsAna_Mareca_americana_GCA_035588595.1.COL1a2_Anas.consensus	DB Search
GETGPAGP(+15.99)PGFQGLP(+15.99)GPSGPAGEAGK	84.58	2321.09	26	0	774.705	3	33.2824	20894	20201209_Lumos_Ritcher_sample148_17.raw		0	0	Proline Oxidation;Proline Oxidation	P8:Proline Oxidation:0.00;P15:Proline Oxidation:26.31	AnsAna_Mareca_penelope_GCA_036026335.1.COL1a2_Anas.consensus:sp|P02467|CO1A2_CHICK:AnsAna_Mareca_strepera_DBGNRM54.COL1a2_Anas.consensus:AnsAna_Mareca_strepera_GCA_035583915.1.COL1a2_Anas.consensus:AnsAna_Mareca_falcata_D2006016302.COL1a2_Anas.consensus:AnsAna_Mareca_sibilatrix_GCA_034783215.1.COL1a2_Anas.consensus:AnsAna_Mareca_americana_GCA_035588595.1.COL1a2_Anas.consensus	DB Search
GETGPAGPAGP(+15.99)PGPAGARGPAGPQ(+0.98)GPR	89.95	2350.14	27	1	784.388	3	22.4611	9688	20201209_Lumos_Ritcher_sample148_17.raw	416000	1	1	Proline Oxidation;Deamidation (NQ)	P11:Proline Oxidation:0.00;Q24:Deamidation (NQ):1000.00	AnsAna_Anas_undulata_B10K-D-IZW-61.COL1a1_Cyg-Gall.consensus:AnsAna_Aythya_americana_D2006016050.COL1a1_Cyg-Gall.consensus:AnsAna_Pteronetta_hartlaubii_D2102046034.COL1a1_Cyg-Gall.consensus:AnsAna_Cereopsis_novaehollandiae_B10K-D-IZW-75.COL1a1_Cyg-Gall.consensus:AnsAna_Branta_leucopsis_DBGNRM65.COL1a1_Cyg-Gall.consensus:AnsAna_Aythya_marila_GCA_029042245.1.COL1a1_Cyg-Gall.consensus:AnsAna_Tadorna…	DB Search
GETGPAGPAGP(+15.99)PGPAGARGPAGPQ(+0.98)GPRG	75.27	2407.16	28	2.1	803.397	3	22.5749	9791	20201209_Lumos_Ritcher_sample148_17.raw	216000	1	1	Proline Oxidation;Deamidation (NQ)	P11:Proline Oxidation:0.00;Q24:Deamidation (NQ):1000.00	AnsAna_Anas_undulata_B10K-D-IZW-61.COL1a1_Cyg-Gall.consensus:AnsAna_Aythya_americana_D2006016050.COL1a1_Cyg-Gall.consensus:AnsAna_Pteronetta_hartlaubii_D2102046034.COL1a1_Cyg-Gall.consensus:AnsAna_Cereopsis_novaehollandiae_B10K-D-IZW-75.COL1a1_Cyg-Gall.consensus:AnsAna_Branta_leucopsis_DBGNRM65.COL1a1_Cyg-Gall.consensus:AnsAna_Aythya_marila_GCA_029042245.1.COL1a1_Cyg-Gall.consensus:AnsAna_Tadorna…	DB Search
GETGPAGPAGP(+15.99)PGPAGARGPAGPQGP(+15.99)R	87.55	2365.15	27	-0.5	789.391	3	20.5844	7622	20201209_Lumos_Ritcher_sample148_17.raw	359000	1	1	Proline Oxidation;Proline Oxidation	P11:Proline Oxidation:0.00;P26:Proline Oxidation:6.63	AnsAna_Anas_undulata_B10K-D-IZW-61.COL1a1_Cyg-Gall.consensus:AnsAna_Aythya_americana_D2006016050.COL1a1_Cyg-Gall.consensus:AnsAna_Pteronetta_hartlaubii_D2102046034.COL1a1_Cyg-Gall.consensus:AnsAna_Cereopsis_novaehollandiae_B10K-D-IZW-75.COL1a1_Cyg-Gall.consensus:AnsAna_Branta_leucopsis_DBGNRM65.COL1a1_Cyg-Gall.consensus:AnsAna_Aythya_marila_GCA_029042245.1.COL1a1_Cyg-Gall.consensus:AnsAna_Tadorna…	DB Search
GETGPAGPAGPP(+15.99)GPAGAR	88.81	1531.74	18	-0.3	766.876	2	19.2631	6468	20201209_Lumos_Ritcher_sample148_17.raw	402000	1	1	Proline Oxidation	P12:Proline Oxidation:10.11	AnsAna_Anas_undulata_B10K-D-IZW-61.COL1a1_Cyg-Gall.consensus:AnsAna_Aythya_americana_D2006016050.COL1a1_Cyg-Gall.consensus:AnsAna_Pteronetta_hartlaubii_D2102046034.COL1a1_Cyg-Gall.consensus:AnsAna_Cereopsis_novaehollandiae_B10K-D-IZW-75.COL1a1_Cyg-Gall.consensus:AnsAna_Branta_leucopsis_DBGNRM65.COL1a1_Cyg-Gall.consensus:AnsAna_Aythya_marila_GCA_029042245.1.COL1a1_Cyg-Gall.consensus:AnsAna_Tadorna…	DB Search
GETGPAGPAGPP(+15.99)GPAGARGPAGPQ(+0.98)GPR	92.16	2350.14	27	1	1176.08	2	24.0819	11406	20201209_Lumos_Ritcher_sample148_17.raw		0	0	Proline Oxidation;Deamidation (NQ)	P12:Proline Oxidation:17.01;Q24:Deamidation (NQ):1000.00	AnsAna_Anas_undulata_B10K-D-IZW-61.COL1a1_Cyg-Gall.consensus:AnsAna_Aythya_americana_D2006016050.COL1a1_Cyg-Gall.consensus:AnsAna_Pteronetta_hartlaubii_D2102046034.COL1a1_Cyg-Gall.consensus:AnsAna_Cereopsis_novaehollandiae_B10K-D-IZW-75.COL1a1_Cyg-Gall.consensus:AnsAna_Branta_leucopsis_DBGNRM65.COL1a1_Cyg-Gall.consensus:AnsAna_Aythya_marila_GCA_029042245.1.COL1a1_Cyg-Gall.consensus:AnsAna_Tadorna…	DB Search
GETGPAGPAGPPGP(+15.99)AGARGPAGPQ(+0.98)GP(+15.99)R	92.25	2366.14	27	0	789.719	3	21.2895	8548	20201209_Lumos_Ritcher_sample148_17.raw	146000	1	1	Proline Oxidation;Deamidation (NQ);Proline Oxidation	P14:Proline Oxidation:0.00;Q24:Deamidation (NQ):1000.00;P26:Proline Oxidation:16.63	AnsAna_Anas_undulata_B10K-D-IZW-61.COL1a1_Cyg-Gall.consensus:AnsAna_Aythya_americana_D2006016050.COL1a1_Cyg-Gall.consensus:AnsAna_Pteronetta_hartlaubii_D2102046034.COL1a1_Cyg-Gall.consensus:AnsAna_Cereopsis_novaehollandiae_B10K-D-IZW-75.COL1a1_Cyg-Gall.consensus:AnsAna_Branta_leucopsis_DBGNRM65.COL1a1_Cyg-Gall.consensus:AnsAna_Aythya_marila_GCA_029042245.1.COL1a1_Cyg-Gall.consensus:AnsAna_Tadorna…	DB Search
GETGPAGPAGPPGP(+15.99)AGARGPAGPQ(+0.98)GPR	90.77	2350.14	27	1	784.388	3	22.4611	9607	20201209_Lumos_Ritcher_sample148_17.raw	416000	1	1	Proline Oxidation;Deamidation (NQ)	P14:Proline Oxidation:0.00;Q24:Deamidation (NQ):1000.00	AnsAna_Anas_undulata_B10K-D-IZW-61.COL1a1_Cyg-Gall.consensus:AnsAna_Aythya_americana_D2006016050.COL1a1_Cyg-Gall.consensus:AnsAna_Pteronetta_hartlaubii_D2102046034.COL1a1_Cyg-Gall.consensus:AnsAna_Cereopsis_novaehollandiae_B10K-D-IZW-75.COL1a1_Cyg-Gall.consensus:AnsAna_Branta_leucopsis_DBGNRM65.COL1a1_Cyg-Gall.consensus:AnsAna_Aythya_marila_GCA_029042245.1.COL1a1_Cyg-Gall.consensus:AnsAna_Tadorna…	DB Search
GETGPAGPAGPPGP(+15.99)AGARGPAGPQGPR	83.35	2349.16	27	-0.3	784.06	3	21.6168	8849	20201209_Lumos_Ritcher_sample148_17.raw		0	0	Proline Oxidation	P14:Proline Oxidation:0.00	AnsAna_Anas_undulata_B10K-D-IZW-61.COL1a1_Cyg-Gall.consensus:AnsAna_Aythya_americana_D2006016050.COL1a1_Cyg-Gall.consensus:AnsAna_Pteronetta_hartlaubii_D2102046034.COL1a1_Cyg-Gall.consensus:AnsAna_Cereopsis_novaehollandiae_B10K-D-IZW-75.COL1a1_Cyg-Gall.consensus:AnsAna_Branta_leucopsis_DBGNRM65.COL1a1_Cyg-Gall.consensus:AnsAna_Aythya_marila_GCA_029042245.1.COL1a1_Cyg-Gall.consensus:AnsAna_Tadorna…	DB Search
GETGPAGPP(+15.99)GAP(+15.99)GAPGAP(+15.99)GPVGPAGK	92.68	2168.05	26	0.6	1085.03	2	23.0768	10342	20201209_Lumos_Ritcher_sample148_17.raw		0	0	Proline Oxidation;Proline Oxidation;Proline Oxidation	P9:Proline Oxidation:23.10;P12:Proline Oxidation:44.84;P18:Proline Oxidation:15.73	AnsAna_Anas_undulata_B10K-D-IZW-61.COL1a1_Cyg-Gall.consensus:AnsAna_Aythya_americana_D2006016050.COL1a1_Cyg-Gall.consensus:AnsAna_Pteronetta_hartlaubii_D2102046034.COL1a1_Cyg-Gall.consensus:AnsAna_Cereopsis_novaehollandiae_B10K-D-IZW-75.COL1a1_Cyg-Gall.consensus:AnsAna_Branta_leucopsis_DBGNRM65.COL1a1_Cyg-Gall.consensus:AnsAna_Aythya_marila_GCA_029042245.1.COL1a1_Cyg-Gall.consensus:AnsAna_Tadorna…	DB Search
GETGPAGPP(+15.99)GAPGAP(+15.99)GAP(+15.99)GPVGPAGK	91.96	2168.05	26	0.6	1085.03	2	23.6671	10969	20201209_Lumos_Ritcher_sample148_17.raw	48400000	1	1	Proline Oxidation;Proline Oxidation;Proline Oxidation	P9:Proline Oxidation:23.10;P15:Proline Oxidation:51.69;P18:Proline Oxidation:22.87	AnsAna_Anas_undulata_B10K-D-IZW-61.COL1a1_Cyg-Gall.consensus:AnsAna_Aythya_americana_D2006016050.COL1a1_Cyg-Gall.consensus:AnsAna_Pteronetta_hartlaubii_D2102046034.COL1a1_Cyg-Gall.consensus:AnsAna_Cereopsis_novaehollandiae_B10K-D-IZW-75.COL1a1_Cyg-Gall.consensus:AnsAna_Branta_leucopsis_DBGNRM65.COL1a1_Cyg-Gall.consensus:AnsAna_Aythya_marila_GCA_029042245.1.COL1a1_Cyg-Gall.consensus:AnsAna_Tadorna…	DB Search
GETGPAGPP(+15.99)GAPGAPGAP(+15.99)GPVGPAGK	93.73	2152.05	26	-0.7	718.358	3	24.9177	12273	20201209_Lumos_Ritcher_sample148_17.raw		0	0	Proline Oxidation;Proline Oxidation	P9:Proline Oxidation:7.65;P18:Proline Oxidation:28.36	AnsAna_Anas_undulata_B10K-D-IZW-61.COL1a1_Cyg-Gall.consensus:AnsAna_Aythya_americana_D2006016050.COL1a1_Cyg-Gall.consensus:AnsAna_Pteronetta_hartlaubii_D2102046034.COL1a1_Cyg-Gall.consensus:AnsAna_Cereopsis_novaehollandiae_B10K-D-IZW-75.COL1a1_Cyg-Gall.consensus:AnsAna_Branta_leucopsis_DBGNRM65.COL1a1_Cyg-Gall.consensus:AnsAna_Aythya_marila_GCA_029042245.1.COL1a1_Cyg-Gall.consensus:AnsAna_Tadorna…	DB Search
GETGPAGPP(+15.99)GF	88.76	1001.45	11	-0.4	501.73	2	31.4634	18954	20201209_Lumos_Ritcher_sample148_17.raw		0	0	Proline Oxidation	P9:Proline Oxidation:17.01	AnsAna_Mareca_penelope_GCA_036026335.1.COL1a2_Anas.consensus:sp|P02467|CO1A2_CHICK:AnsAna_Mareca_strepera_DBGNRM54.COL1a2_Anas.consensus:AnsAna_Mareca_strepera_GCA_035583915.1.COL1a2_Anas.consensus:AnsAna_Mareca_falcata_D2006016302.COL1a2_Anas.consensus:AnsAna_Mareca_sibilatrix_GCA_034783215.1.COL1a2_Anas.consensus:AnsAna_Mareca_americana_GCA_035588595.1.COL1a2_Anas.consensus	DB Search
GETGPAGPP(+15.99)GFQ(+0.98)GLP(+15.99)GPSGPAGEAGK	92.98	2322.08	26	0.9	775.033	3	34.4237	22224	20201209_Lumos_Ritcher_sample148_17.raw	5050000	2	2	Proline Oxidation;Deamidation (NQ);Proline Oxidation	P9:Proline Oxidation:0.00;Q12:Deamidation (NQ):1000.00;P15:Proline Oxidation:22.85	AnsAna_Mareca_penelope_GCA_036026335.1.COL1a2_Anas.consensus:sp|P02467|CO1A2_CHICK:AnsAna_Mareca_strepera_DBGNRM54.COL1a2_Anas.consensus:AnsAna_Mareca_strepera_GCA_035583915.1.COL1a2_Anas.consensus:AnsAna_Mareca_falcata_D2006016302.COL1a2_Anas.consensus:AnsAna_Mareca_sibilatrix_GCA_034783215.1.COL1a2_Anas.consensus:AnsAna_Mareca_americana_GCA_035588595.1.COL1a2_Anas.consensus	DB Search
GETGPAGPP(+15.99)GFQ(+0.98)GLP(+15.99)GPSGPAGEAGKP(+15.99)GER	57.1	2777.29	30	0.5	926.771	3	31.5707	18854	20201209_Lumos_Ritcher_sample148_17.raw	65500000	1	1	Proline Oxidation;Deamidation (NQ);Proline Oxidation;Proline Oxidation	P9:Proline Oxidation:24.44;Q12:Deamidation (NQ):1000.00;P15:Proline Oxidation:30.83;P27:Proline Oxidation:32.20	AnsAna_Mareca_penelope_GCA_036026335.1.COL1a2_Anas.consensus:sp|P02467|CO1A2_CHICK:AnsAna_Mareca_strepera_DBGNRM54.COL1a2_Anas.consensus:AnsAna_Mareca_strepera_GCA_035583915.1.COL1a2_Anas.consensus:AnsAna_Mareca_falcata_D2006016302.COL1a2_Anas.consensus:AnsAna_Mareca_sibilatrix_GCA_034783215.1.COL1a2_Anas.consensus:AnsAna_Mareca_americana_GCA_035588595.1.COL1a2_Anas.consensus	SPIDER
GETGPAGPP(+15.99)GFQGLP(+15.99)GPSGPAGEAGK	91.02	2321.09	26	-0.9	1161.55	2	33.6598	21180	20201209_Lumos_Ritcher_sample148_17.raw	914000	1	1	Proline Oxidation;Proline Oxidation	P9:Proline Oxidation:12.28;P15:Proline Oxidation:22.85	AnsAna_Mareca_penelope_GCA_036026335.1.COL1a2_Anas.consensus:sp|P02467|CO1A2_CHICK:AnsAna_Mareca_strepera_DBGNRM54.COL1a2_Anas.consensus:AnsAna_Mareca_strepera_GCA_035583915.1.COL1a2_Anas.consensus:AnsAna_Mareca_falcata_D2006016302.COL1a2_Anas.consensus:AnsAna_Mareca_sibilatrix_GCA_034783215.1.COL1a2_Anas.consensus:AnsAna_Mareca_americana_GCA_035588595.1.COL1a2_Anas.consensus	DB Search
GETGPAGPP(+15.99)GFQGLP(+15.99)GPSGPAGEAGKP(+15.99)GER	98.92	2776.31	30	-1.9	695.082	4	31.3845	18863	20201209_Lumos_Ritcher_sample148_17.raw	65400000	2	2	Proline Oxidation;Proline Oxidation;Proline Oxidation	P9:Proline Oxidation:9.34;P15:Proline Oxidation:26.31;P27:Proline Oxidation:23.64	AnsAna_Mareca_penelope_GCA_036026335.1.COL1a2_Anas.consensus:sp|P02467|CO1A2_CHICK:AnsAna_Mareca_strepera_DBGNRM54.COL1a2_Anas.consensus:AnsAna_Mareca_strepera_GCA_035583915.1.COL1a2_Anas.consensus:AnsAna_Mareca_falcata_D2006016302.COL1a2_Anas.consensus:AnsAna_Mareca_sibilatrix_GCA_034783215.1.COL1a2_Anas.consensus:AnsAna_Mareca_americana_GCA_035588595.1.COL1a2_Anas.consensus	DB Search
GETGPAGPPA(sub G)FQ(+0.98)GLP(+15.99)GPSGPAGEAGKP(+15.99)GER	52.68	2775.31	30	-4.2	1388.66	2	30.8212	18247	20201209_Lumos_Ritcher_sample148_17.raw		0	0	Gly->Ala substitution;Deamidation (NQ);Proline Oxidation;Proline Oxidation	Q12:Deamidation (NQ):1000.00;P15:Proline Oxidation:22.85;P27:Proline Oxidation:67.12	AnsAna_Mareca_penelope_GCA_036026335.1.COL1a2_Anas.consensus:sp|P02467|CO1A2_CHICK:AnsAna_Mareca_strepera_DBGNRM54.COL1a2_Anas.consensus:AnsAna_Mareca_strepera_GCA_035583915.1.COL1a2_Anas.consensus:AnsAna_Mareca_falcata_D2006016302.COL1a2_Anas.consensus:AnsAna_Mareca_sibilatrix_GCA_034783215.1.COL1a2_Anas.consensus:AnsAna_Mareca_americana_GCA_035588595.1.COL1a2_Anas.consensus	SPIDER
GETGPAGPPGAP(+15.99)GAPGAPGPVGPAGKN(+0.98)G	81.83	2308.11	28	4.4	770.38	3	21.7715	8864	20201209_Lumos_Ritcher_sample148_17.raw	4530000	1	1	Proline Oxidation;Deamidation (NQ)	P12:Proline Oxidation:0.00;N27:Deamidation (NQ):1000.00	AnsAna_Anas_undulata_B10K-D-IZW-61.COL1a1_Cyg-Gall.consensus:AnsAna_Aythya_americana_D2006016050.COL1a1_Cyg-Gall.consensus:AnsAna_Pteronetta_hartlaubii_D2102046034.COL1a1_Cyg-Gall.consensus:AnsAna_Cereopsis_novaehollandiae_B10K-D-IZW-75.COL1a1_Cyg-Gall.consensus:AnsAna_Branta_leucopsis_DBGNRM65.COL1a1_Cyg-Gall.consensus:AnsAna_Aythya_marila_GCA_029042245.1.COL1a1_Cyg-Gall.consensus:AnsAna_Tadorna…	DB Search
GETGPAGRP(+15.99)GEPGPAGP(+15.99)P(+15.99)GPPGEK	47.7	2213.03	24	-0.1	738.685	3	79.0651	49132	20201209_Lumos_Ritcher_sample148_17.raw	20500	1	1	Proline Oxidation;Proline Oxidation;Proline Oxidation	P9:Proline Oxidation:0.00;P17:Proline Oxidation:0.00;P18:Proline Oxidation:0.00	AnsAna_Neochen_jubata_B10K-D-WWT-20.COL1a1_Cyg-Gall.consensus:AnsAna_Cereopsis_novaehollandiae_B10K-D-IZW-75.COL1a1_Cyg-Gall.consensus:AnsAna_Mareca_penelope_GCA_036026335.1.COL1a1_Cyg-Gall.consensus:AnsAna_Spatula_rhynchotis_GCA_034783165.1.COL1a1_Cyg-Gall.consensus:AnsAna_Aythya_marila_GCA_029042245.1.COL1a1_Cyg-Gall.consensus:AnsAna_Anser_cygnoides_GCA_025388735.1.COL1a1_Cyg-Gall.consensus:Ans…	DB Search
GETGPAGRP(+15.99)GEPGPAGPP(+15.99)GP(+15.99)P(+15.99)GEK	41.65	2229.03	24	-0.2	744.017	3	17.6297	4736	20201209_Lumos_Ritcher_sample148_17.raw	1150000	1	1	Proline Oxidation;Proline Oxidation;Proline Oxidation;Proline Oxidation	P9:Proline Oxidation:32.97;P18:Proline Oxidation:9.34;P20:Proline Oxidation:38.16;P21:Proline Oxidation:33.81	AnsAna_Spatula_discors_GCA_032165275.1.COL1a1_Cyg-Gall.consensus:AnsAna_Mareca_sibilatrix_GCA_034783215.1.COL1a1_Cyg-Gall.consensus:AnsAna_Cereopsis_novaehollandiae_B10K-D-IZW-75.COL1a1_Cyg-Gall.consensus:AnsAna_Tachyeres_brachypterus_GCA_032357605.1.COL1a1_Cyg-Gall.consensus:AnsAna_Aythya_marila_GCA_029042245.1.COL1a1_Cyg-Gall.consensus:AnsAna_Dendrocygna_bicolor_B10K-D-IZW-84.COL1a1_Cyg-Gall.co…	SPIDER
GETGPAGRP(+15.99)GEPGPAGPP(+15.99)GP(+15.99)PGE	93.25	2084.94	23	0.3	1043.48	2	20.7383	7855	20201209_Lumos_Ritcher_sample148_17.raw	148000	1	1	Proline Oxidation;Proline Oxidation;Proline Oxidation	P9:Proline Oxidation:22.45;P18:Proline Oxidation:14.02;P20:Proline Oxidation:0.00	AnsAna_Cereopsis_novaehollandiae_B10K-D-IZW-75.COL1a1_Cyg-Gall.consensus:AnsAna_Aythya_marila_GCA_029042245.1.COL1a1_Cyg-Gall.consensus:AnsAna_Anser_cygnoides_GCA_025388735.1.COL1a1_Cyg-Gall.consensus:AnsAna_Branta_hutchinsii_GCA_032270845.1.COL1a1_Cyg-Gall.consensus:AnsAna_Spatula_querquedula_GCA_032191525.1.COL1a1_Cyg-Gall.consensus:AnsAna_Aix_galericulata_GCA_024635365.1.COL1a1_Cyg-Gall.consen…	DB Search
GETGPAGRP(+15.99)GEPGPAGPP(+15.99)GPP(+15.99)GE	95.75	2084.94	23	0.6	695.988	3	20.6304	7747	20201209_Lumos_Ritcher_sample148_17.raw	230000	1	1	Proline Oxidation;Proline Oxidation;Proline Oxidation	P9:Proline Oxidation:16.51;P18:Proline Oxidation:12.28;P21:Proline Oxidation:12.28	AnsAna_Cereopsis_novaehollandiae_B10K-D-IZW-75.COL1a1_Cyg-Gall.consensus:AnsAna_Aythya_marila_GCA_029042245.1.COL1a1_Cyg-Gall.consensus:AnsAna_Anser_cygnoides_GCA_025388735.1.COL1a1_Cyg-Gall.consensus:AnsAna_Branta_hutchinsii_GCA_032270845.1.COL1a1_Cyg-Gall.consensus:AnsAna_Spatula_querquedula_GCA_032191525.1.COL1a1_Cyg-Gall.consensus:AnsAna_Aix_galericulata_GCA_024635365.1.COL1a1_Cyg-Gall.consen…	DB Search
GETGPAGRP(+15.99)GEPGPAGPP(+15.99)GPP(+15.99)GEK	94.7	2213.03	24	-0.4	738.685	3	17.8453	5009	20201209_Lumos_Ritcher_sample148_17.raw	1150000	1	1	Proline Oxidation;Proline Oxidation;Proline Oxidation	P9:Proline Oxidation:22.37;P18:Proline Oxidation:14.02;P21:Proline Oxidation:14.02	AnsAna_Cereopsis_novaehollandiae_B10K-D-IZW-75.COL1a1_Cyg-Gall.consensus:AnsAna_Aythya_marila_GCA_029042245.1.COL1a1_Cyg-Gall.consensus:AnsAna_Anser_cygnoides_GCA_025388735.1.COL1a1_Cyg-Gall.consensus:AnsAna_Branta_hutchinsii_GCA_032270845.1.COL1a1_Cyg-Gall.consensus:AnsAna_Spatula_querquedula_GCA_032191525.1.COL1a1_Cyg-Gall.consensus:AnsAna_Aix_galericulata_GCA_024635365.1.COL1a1_Cyg-Gall.consen…	DB Search
GETGPAGRP(+15.99)GEPGPAGPP(+15.99)GPPGEK	94.63	2197.04	24	-0.2	733.354	3	19.0893	6321	20201209_Lumos_Ritcher_sample148_17.raw		0	0	Proline Oxidation;Proline Oxidation	P9:Proline Oxidation:22.37;P18:Proline Oxidation:17.01	AnsAna_Cereopsis_novaehollandiae_B10K-D-IZW-75.COL1a1_Cyg-Gall.consensus:AnsAna_Aythya_marila_GCA_029042245.1.COL1a1_Cyg-Gall.consensus:AnsAna_Anser_cygnoides_GCA_025388735.1.COL1a1_Cyg-Gall.consensus:AnsAna_Branta_hutchinsii_GCA_032270845.1.COL1a1_Cyg-Gall.consensus:AnsAna_Spatula_querquedula_GCA_032191525.1.COL1a1_Cyg-Gall.consensus:AnsAna_Aix_galericulata_GCA_024635365.1.COL1a1_Cyg-Gall.consen…	DB Search
GETGPAGRPGEPGPAGPP(+15.99)GP(+15.99)PGEK	85.79	2197.04	24	-4.3	733.351	3	20.0599	7329	20201209_Lumos_Ritcher_sample148_17.raw		0	0	Proline Oxidation;Proline Oxidation	P18:Proline Oxidation:9.34;P20:Proline Oxidation:0.00	AnsAna_Cereopsis_novaehollandiae_B10K-D-IZW-75.COL1a1_Cyg-Gall.consensus:AnsAna_Aythya_marila_GCA_029042245.1.COL1a1_Cyg-Gall.consensus:AnsAna_Anser_cygnoides_GCA_025388735.1.COL1a1_Cyg-Gall.consensus:AnsAna_Branta_hutchinsii_GCA_032270845.1.COL1a1_Cyg-Gall.consensus:AnsAna_Spatula_querquedula_GCA_032191525.1.COL1a1_Cyg-Gall.consensus:AnsAna_Aix_galericulata_GCA_024635365.1.COL1a1_Cyg-Gall.consen…	DB Search
GETGPQ(+0.98)GAR	83.6	872.399	9	-0.1	437.207	2	12.5835	2890	20201209_Lumos_Ritcher_sample148_17.raw		0	0	Deamidation (NQ)	Q6:Deamidation (NQ):1000.00	AnsAna_Anas_undulata_B10K-D-IZW-61.COL1a1_Cyg-Gall.consensus:AnsAna_Aythya_americana_D2006016050.COL1a1_Cyg-Gall.consensus:AnsAna_Cereopsis_novaehollandiae_B10K-D-IZW-75.COL1a1_Cyg-Gall.consensus:AnsAna_Branta_leucopsis_DBGNRM65.COL1a1_Cyg-Gall.consensus:AnsAna_Aythya_marila_GCA_029042245.1.COL1a1_Cyg-Gall.consensus:AnsAna_Tadorna_tadorna_DBGNRM58.COL1a1_Cyg-Gall.consensus:AnsAna_Anser_cygnoides_…	DB Search
GETGPQ(+0.98)GPAGPPGP(+15.99)AGAR	47.15	1589.74	18	-4.7	795.875	2	20.4164	7563	20201209_Lumos_Ritcher_sample148_17.raw		0	0	Deamidation (NQ);Proline Oxidation	Q6:Deamidation (NQ):1000.00;P14:Proline Oxidation:0.00	AnsAna_Aix_sponsa_GCA_032270905.1.COL1a1_Cyg-Gall.consensus	DB Search
GETGPTGAIGP(+15.99)IGASGP(+15.99)P(+15.99)GPAGAAGPAGPR	90.17	2542.24	30	-0.9	848.42	3	34.6569	22227	20201209_Lumos_Ritcher_sample148_17.raw	628000	1	1	Proline Oxidation;Proline Oxidation;Proline Oxidation	P11:Proline Oxidation:23.56;P17:Proline Oxidation:9.55;P18:Proline Oxidation:15.38	AnsAna_Lophodytes_cucullatus_B10K-D-WWT-15.COL1a2_Anas.consensus:AnsAna_Spatula_platalea_D2007020414.COL1a2_Anas.consensus:AnsAna_Spatula_smithii_GCA_035221675.1.COL1a2_Anas.consensus:AnsAna_Anas_gibberifrons_D2007020344.COL1a2_Anas.consensus:AnsAna_Aythya_baeri_GCA_026413565.1.COL1a2_Anas.consensus:AnsAna_Cyanochen_cyanoptera_B10K-D-WWT-10.COL1a2_Anas.consensus:AnsAna_Plectropterus_gambensis_B10…	DB Search
GETGPTGAIGP(+15.99)IGASGPP(+15.99)GP(+15.99)AGAAGPAGPR	103.23	2542.24	30	-0.5	848.421	3	32.8032	20398	20201209_Lumos_Ritcher_sample148_17.raw		0	0	Proline Oxidation;Proline Oxidation;Proline Oxidation	P11:Proline Oxidation:0.00;P18:Proline Oxidation:0.00;P20:Proline Oxidation:0.00	AnsAna_Lophodytes_cucullatus_B10K-D-WWT-15.COL1a2_Anas.consensus:AnsAna_Spatula_platalea_D2007020414.COL1a2_Anas.consensus:AnsAna_Spatula_smithii_GCA_035221675.1.COL1a2_Anas.consensus:AnsAna_Anas_gibberifrons_D2007020344.COL1a2_Anas.consensus:AnsAna_Aythya_baeri_GCA_026413565.1.COL1a2_Anas.consensus:AnsAna_Cyanochen_cyanoptera_B10K-D-WWT-10.COL1a2_Anas.consensus:AnsAna_Plectropterus_gambensis_B10…	DB Search
GETGPTGAIGP(+15.99)VGASGP(+15.99)PGP(+15.99)AGAAGPAGPR	51.05	2528.23	30	10	843.758	3	33.4238	21042	20201209_Lumos_Ritcher_sample148_17.raw		0	0	Proline Oxidation;Proline Oxidation;Proline Oxidation	P11:Proline Oxidation:4.12;P17:Proline Oxidation:0.00;P20:Proline Oxidation:14.32	AnsAna_Anser_indicus_GCA_025583725.1.COL1a2_Anas.consensus:AnsAna_Chloephaga_poliocephala_B10K-D-IZW-11.COL1a2_Anas.consensus:AnsAna_Branta_ruficollis_D2104051282.COL1a2_Anas.consensus:AnsAna_Cygnus_olor_GCA_009769485.2.COL1a2_Anas.consensus:AnsAna_Chloephaga_rubidiceps_D2104051194.COL1a2_Anas.consensus:AnsAna_Cygnus_atratus_GCA_013377495.2.COL1a2_Anas.consensus:AnsAna_Cygnus_buccinator_GCA_01923…	DB Search
GETGPTGAIGP(+15.99)VGASGPP(+15.99)GPAGAAGPAGPR	81.58	2512.23	30	-0.8	838.417	3	31.652	19164	20201209_Lumos_Ritcher_sample148_17.raw		0	0	Proline Oxidation;Proline Oxidation	P11:Proline Oxidation:5.30;P18:Proline Oxidation:9.40	AnsAna_Anser_indicus_GCA_025583725.1.COL1a2_Anas.consensus:AnsAna_Chloephaga_poliocephala_B10K-D-IZW-11.COL1a2_Anas.consensus:AnsAna_Branta_ruficollis_D2104051282.COL1a2_Anas.consensus:AnsAna_Cygnus_olor_GCA_009769485.2.COL1a2_Anas.consensus:AnsAna_Chloephaga_rubidiceps_D2104051194.COL1a2_Anas.consensus:AnsAna_Cygnus_atratus_GCA_013377495.2.COL1a2_Anas.consensus:AnsAna_Cygnus_buccinator_GCA_01923…	DB Search
GETGPTGAIGPIG	94.24	1125.57	13	-1	563.79	2	35.2233	22848	20201209_Lumos_Ritcher_sample148_17.raw	633000	1	1			AnsAna_Lophodytes_cucullatus_B10K-D-WWT-15.COL1a2_Anas.consensus:AnsAna_Spatula_platalea_D2007020414.COL1a2_Anas.consensus:AnsAna_Spatula_smithii_GCA_035221675.1.COL1a2_Anas.consensus:AnsAna_Anas_gibberifrons_D2007020344.COL1a2_Anas.consensus:AnsAna_Aythya_baeri_GCA_026413565.1.COL1a2_Anas.consensus:AnsAna_Cyanochen_cyanoptera_B10K-D-WWT-10.COL1a2_Anas.consensus:AnsAna_Plectropterus_gambensis_B10…	DB Search
GETGPTGAIGPIGA	94.11	1196.6	14	0.2	599.309	2	35.9283	23573	20201209_Lumos_Ritcher_sample148_17.raw	112000	1	1			AnsAna_Lophodytes_cucullatus_B10K-D-WWT-15.COL1a2_Anas.consensus:AnsAna_Spatula_platalea_D2007020414.COL1a2_Anas.consensus:AnsAna_Spatula_smithii_GCA_035221675.1.COL1a2_Anas.consensus:AnsAna_Anas_gibberifrons_D2007020344.COL1a2_Anas.consensus:AnsAna_Aythya_baeri_GCA_026413565.1.COL1a2_Anas.consensus:AnsAna_Cyanochen_cyanoptera_B10K-D-WWT-10.COL1a2_Anas.consensus:AnsAna_Plectropterus_gambensis_B10…	DB Search
GETGPTGAIGPIGAS(-18.01)GPP(+15.99)GPAGAAGPAGPR	64.31	2492.24	30	4.1	831.758	3	33.8968	21493	20201209_Lumos_Ritcher_sample148_17.raw		0	0	Dehydration;Proline Oxidation	S15:Dehydration:32.72;P18:Proline Oxidation:14.02	AnsAna_Lophodytes_cucullatus_B10K-D-WWT-15.COL1a2_Anas.consensus:AnsAna_Spatula_platalea_D2007020414.COL1a2_Anas.consensus:AnsAna_Anas_gibberifrons_D2007020344.COL1a2_Anas.consensus:AnsAna_Spatula_smithii_GCA_035221675.1.COL1a2_Anas.consensus:AnsAna_Aythya_baeri_GCA_026413565.1.COL1a2_Anas.consensus:AnsAna_Cyanochen_cyanoptera_B10K-D-WWT-10.COL1a2_Anas.consensus:AnsAna_Plectropterus_gambensis_B10…	PEAKS PTM
GETGPTGAIGPIGASGP(+13.98)PGPAGAAGPAGPR	46.38	2508.24	30	-1.5	837.085	3	34.9046	22316	20201209_Lumos_Ritcher_sample148_17.raw	80000	1	1	Proline oxidation to pyroglutamic acid	P17:Proline oxidation to pyroglutamic acid:0.00	AnsAna_Lophodytes_cucullatus_B10K-D-WWT-15.COL1a2_Anas.consensus:AnsAna_Spatula_platalea_D2007020414.COL1a2_Anas.consensus:AnsAna_Anas_gibberifrons_D2007020344.COL1a2_Anas.consensus:AnsAna_Spatula_smithii_GCA_035221675.1.COL1a2_Anas.consensus:AnsAna_Aythya_baeri_GCA_026413565.1.COL1a2_Anas.consensus:AnsAna_Cyanochen_cyanoptera_B10K-D-WWT-10.COL1a2_Anas.consensus:AnsAna_Plectropterus_gambensis_B10…	PEAKS PTM
GETGPTGAIGPIGASGP(+15.99)P(+15.99)GP(+15.99)AGAAGPAGPR	92	2542.24	30	4	848.424	3	33.1563	20775	20201209_Lumos_Ritcher_sample148_17.raw		0	0	Proline Oxidation;Proline Oxidation;Proline Oxidation	P17:Proline Oxidation:12.76;P18:Proline Oxidation:22.20;P20:Proline Oxidation:34.08	AnsAna_Lophodytes_cucullatus_B10K-D-WWT-15.COL1a2_Anas.consensus:AnsAna_Spatula_platalea_D2007020414.COL1a2_Anas.consensus:AnsAna_Spatula_smithii_GCA_035221675.1.COL1a2_Anas.consensus:AnsAna_Anas_gibberifrons_D2007020344.COL1a2_Anas.consensus:AnsAna_Aythya_baeri_GCA_026413565.1.COL1a2_Anas.consensus:AnsAna_Cyanochen_cyanoptera_B10K-D-WWT-10.COL1a2_Anas.consensus:AnsAna_Plectropterus_gambensis_B10…	DB Search
GETGPTGAIGPIGASGP(+15.99)P(+15.99)GPAGAAGP(+15.99)AGPR	98.99	2542.24	30	1.1	848.422	3	31.7182	19234	20201209_Lumos_Ritcher_sample148_17.raw		0	0	Proline Oxidation;Proline Oxidation;Proline Oxidation	P17:Proline Oxidation:22.69;P18:Proline Oxidation:11.10;P26:Proline Oxidation:13.38	AnsAna_Lophodytes_cucullatus_B10K-D-WWT-15.COL1a2_Anas.consensus:AnsAna_Spatula_platalea_D2007020414.COL1a2_Anas.consensus:AnsAna_Spatula_smithii_GCA_035221675.1.COL1a2_Anas.consensus:AnsAna_Anas_gibberifrons_D2007020344.COL1a2_Anas.consensus:AnsAna_Aythya_baeri_GCA_026413565.1.COL1a2_Anas.consensus:AnsAna_Cyanochen_cyanoptera_B10K-D-WWT-10.COL1a2_Anas.consensus:AnsAna_Plectropterus_gambensis_B10…	DB Search
GETGPTGAIGPIGASGP(+15.99)P(+15.99)GPAGAAGPAGPR	89.96	2526.25	30	-0.3	843.089	3	32.7935	19927	20201209_Lumos_Ritcher_sample148_17.raw	26100000	1	1	Proline Oxidation;Proline Oxidation	P17:Proline Oxidation:0.00;P18:Proline Oxidation:0.00	AnsAna_Lophodytes_cucullatus_B10K-D-WWT-15.COL1a2_Anas.consensus:AnsAna_Spatula_platalea_D2007020414.COL1a2_Anas.consensus:AnsAna_Anas_gibberifrons_D2007020344.COL1a2_Anas.consensus:AnsAna_Spatula_smithii_GCA_035221675.1.COL1a2_Anas.consensus:AnsAna_Aythya_baeri_GCA_026413565.1.COL1a2_Anas.consensus:AnsAna_Cyanochen_cyanoptera_B10K-D-WWT-10.COL1a2_Anas.consensus:AnsAna_Plectropterus_gambensis_B10…	DB Search
GETGPTGAIGPIGASGP(+15.99)PGP(+15.99)AGAAGPAGPR	94.11	2526.25	30	-0.3	843.089	3	32.7935	20884	20201209_Lumos_Ritcher_sample148_17.raw	26100000	1	1	Proline Oxidation;Proline Oxidation	P17:Proline Oxidation:0.00;P20:Proline Oxidation:14.04	AnsAna_Lophodytes_cucullatus_B10K-D-WWT-15.COL1a2_Anas.consensus:AnsAna_Spatula_platalea_D2007020414.COL1a2_Anas.consensus:AnsAna_Spatula_smithii_GCA_035221675.1.COL1a2_Anas.consensus:AnsAna_Anas_gibberifrons_D2007020344.COL1a2_Anas.consensus:AnsAna_Aythya_baeri_GCA_026413565.1.COL1a2_Anas.consensus:AnsAna_Cyanochen_cyanoptera_B10K-D-WWT-10.COL1a2_Anas.consensus:AnsAna_Plectropterus_gambensis_B10…	DB Search
GETGPTGAIGPIGASGPP(+13.98)GPAGAAGPAGPR	48.33	2508.24	30	-0.4	837.086	3	33.5568	21161	20201209_Lumos_Ritcher_sample148_17.raw		0	0	Proline oxidation to pyroglutamic acid	P18:Proline oxidation to pyroglutamic acid:0.00	AnsAna_Lophodytes_cucullatus_B10K-D-WWT-15.COL1a2_Anas.consensus:AnsAna_Spatula_platalea_D2007020414.COL1a2_Anas.consensus:AnsAna_Anas_gibberifrons_D2007020344.COL1a2_Anas.consensus:AnsAna_Spatula_smithii_GCA_035221675.1.COL1a2_Anas.consensus:AnsAna_Aythya_baeri_GCA_026413565.1.COL1a2_Anas.consensus:AnsAna_Cyanochen_cyanoptera_B10K-D-WWT-10.COL1a2_Anas.consensus:AnsAna_Plectropterus_gambensis_B10…	PEAKS PTM
GETGPTGAIGPIGASGPP(+15.99)GP(+15.99)AGAAGPAGPR	105.15	2526.25	30	-0.3	843.089	3	32.7935	21078	20201209_Lumos_Ritcher_sample148_17.raw	26100000	1	1	Proline Oxidation;Proline Oxidation	P18:Proline Oxidation:12.28;P20:Proline Oxidation:19.05	AnsAna_Lophodytes_cucullatus_B10K-D-WWT-15.COL1a2_Anas.consensus:AnsAna_Spatula_platalea_D2007020414.COL1a2_Anas.consensus:AnsAna_Spatula_smithii_GCA_035221675.1.COL1a2_Anas.consensus:AnsAna_Anas_gibberifrons_D2007020344.COL1a2_Anas.consensus:AnsAna_Aythya_baeri_GCA_026413565.1.COL1a2_Anas.consensus:AnsAna_Cyanochen_cyanoptera_B10K-D-WWT-10.COL1a2_Anas.consensus:AnsAna_Plectropterus_gambensis_B10…	DB Search
GETGPTGAIGPIGASGPP(+15.99)GPA	77.44	1775.87	21	0	888.942	2	35.9168	23364	20201209_Lumos_Ritcher_sample148_17.raw	2550000	1	1	Proline Oxidation	P18:Proline Oxidation:12.28	AnsAna_Lophodytes_cucullatus_B10K-D-WWT-15.COL1a2_Anas.consensus:AnsAna_Spatula_platalea_D2007020414.COL1a2_Anas.consensus:AnsAna_Spatula_smithii_GCA_035221675.1.COL1a2_Anas.consensus:AnsAna_Anas_gibberifrons_D2007020344.COL1a2_Anas.consensus:AnsAna_Aythya_baeri_GCA_026413565.1.COL1a2_Anas.consensus:AnsAna_Cyanochen_cyanoptera_B10K-D-WWT-10.COL1a2_Anas.consensus:AnsAna_Plectropterus_gambensis_B10…	DB Search
GETGPTGAIGPIGASGPP(+15.99)GPAG	92.55	1832.89	22	-1	917.452	2	35.3864	22954	20201209_Lumos_Ritcher_sample148_17.raw	1120000	1	1	Proline Oxidation	P18:Proline Oxidation:14.02	AnsAna_Lophodytes_cucullatus_B10K-D-WWT-15.COL1a2_Anas.consensus:AnsAna_Spatula_platalea_D2007020414.COL1a2_Anas.consensus:AnsAna_Spatula_smithii_GCA_035221675.1.COL1a2_Anas.consensus:AnsAna_Anas_gibberifrons_D2007020344.COL1a2_Anas.consensus:AnsAna_Aythya_baeri_GCA_026413565.1.COL1a2_Anas.consensus:AnsAna_Cyanochen_cyanoptera_B10K-D-WWT-10.COL1a2_Anas.consensus:AnsAna_Plectropterus_gambensis_B10…	DB Search
GETGPTGAIGPIGASGPP(+15.99)GPAGA	92.45	1903.93	23	-1	952.97	2	36.0768	23737	20201209_Lumos_Ritcher_sample148_17.raw		0	0	Proline Oxidation	P18:Proline Oxidation:23.10	AnsAna_Lophodytes_cucullatus_B10K-D-WWT-15.COL1a2_Anas.consensus:AnsAna_Spatula_platalea_D2007020414.COL1a2_Anas.consensus:AnsAna_Spatula_smithii_GCA_035221675.1.COL1a2_Anas.consensus:AnsAna_Anas_gibberifrons_D2007020344.COL1a2_Anas.consensus:AnsAna_Aythya_baeri_GCA_026413565.1.COL1a2_Anas.consensus:AnsAna_Cyanochen_cyanoptera_B10K-D-WWT-10.COL1a2_Anas.consensus:AnsAna_Plectropterus_gambensis_B10…	DB Search
GETGPTGAIGPIGASGPP(+15.99)GPAGAA	98.57	1974.96	24	-0.8	659.328	3	36.1038	23765	20201209_Lumos_Ritcher_sample148_17.raw		0	0	Proline Oxidation	P18:Proline Oxidation:9.34	AnsAna_Lophodytes_cucullatus_B10K-D-WWT-15.COL1a2_Anas.consensus:AnsAna_Spatula_platalea_D2007020414.COL1a2_Anas.consensus:AnsAna_Spatula_smithii_GCA_035221675.1.COL1a2_Anas.consensus:AnsAna_Anas_gibberifrons_D2007020344.COL1a2_Anas.consensus:AnsAna_Aythya_baeri_GCA_026413565.1.COL1a2_Anas.consensus:AnsAna_Cyanochen_cyanoptera_B10K-D-WWT-10.COL1a2_Anas.consensus:AnsAna_Plectropterus_gambensis_B10…	DB Search
GETGPTGAIGPIGASGPP(+15.99)GPAGAAGP(+15.99)AGP(+15.99)R	92.07	2542.24	30	-2.6	848.419	3	33.435	21051	20201209_Lumos_Ritcher_sample148_17.raw		0	0	Proline Oxidation;Proline Oxidation;Proline Oxidation	P18:Proline Oxidation:9.34;P26:Proline Oxidation:33.66;P29:Proline Oxidation:24.63	AnsAna_Lophodytes_cucullatus_B10K-D-WWT-15.COL1a2_Anas.consensus:AnsAna_Spatula_platalea_D2007020414.COL1a2_Anas.consensus:AnsAna_Spatula_smithii_GCA_035221675.1.COL1a2_Anas.consensus:AnsAna_Anas_gibberifrons_D2007020344.COL1a2_Anas.consensus:AnsAna_Aythya_baeri_GCA_026413565.1.COL1a2_Anas.consensus:AnsAna_Cyanochen_cyanoptera_B10K-D-WWT-10.COL1a2_Anas.consensus:AnsAna_Plectropterus_gambensis_B10…	DB Search
GETGPTGAIGPIGASGPP(+15.99)GPAGAAGP(+15.99)AGPR	95.03	2526.25	30	-0.3	843.089	3	32.7935	20446	20201209_Lumos_Ritcher_sample148_17.raw	28100000	2	2	Proline Oxidation;Proline Oxidation	P18:Proline Oxidation:13.27;P26:Proline Oxidation:11.84	AnsAna_Lophodytes_cucullatus_B10K-D-WWT-15.COL1a2_Anas.consensus:AnsAna_Spatula_platalea_D2007020414.COL1a2_Anas.consensus:AnsAna_Spatula_smithii_GCA_035221675.1.COL1a2_Anas.consensus:AnsAna_Anas_gibberifrons_D2007020344.COL1a2_Anas.consensus:AnsAna_Aythya_baeri_GCA_026413565.1.COL1a2_Anas.consensus:AnsAna_Cyanochen_cyanoptera_B10K-D-WWT-10.COL1a2_Anas.consensus:AnsAna_Plectropterus_gambensis_B10…	DB Search
GETGPTGAIGPIGASGPP(+15.99)GPAGAAGPA	97.32	2200.08	27	-0.2	734.366	3	36.9303	24460	20201209_Lumos_Ritcher_sample148_17.raw	1800000	2	2	Proline Oxidation	P18:Proline Oxidation:5.99	AnsAna_Lophodytes_cucullatus_B10K-D-WWT-15.COL1a2_Anas.consensus:AnsAna_Spatula_platalea_D2007020414.COL1a2_Anas.consensus:AnsAna_Spatula_smithii_GCA_035221675.1.COL1a2_Anas.consensus:AnsAna_Anas_gibberifrons_D2007020344.COL1a2_Anas.consensus:AnsAna_Aythya_baeri_GCA_026413565.1.COL1a2_Anas.consensus:AnsAna_Cyanochen_cyanoptera_B10K-D-WWT-10.COL1a2_Anas.consensus:AnsAna_Plectropterus_gambensis_B10…	DB Search
GETGPTGAIGPIGASGPP(+15.99)GPAGAAGPAG	85.26	2257.1	28	-0.5	753.373	3	36.3973	24070	20201209_Lumos_Ritcher_sample148_17.raw		0	0	Proline Oxidation	P18:Proline Oxidation:14.02	AnsAna_Lophodytes_cucullatus_B10K-D-WWT-15.COL1a2_Anas.consensus:AnsAna_Spatula_platalea_D2007020414.COL1a2_Anas.consensus:AnsAna_Spatula_smithii_GCA_035221675.1.COL1a2_Anas.consensus:AnsAna_Anas_gibberifrons_D2007020344.COL1a2_Anas.consensus:AnsAna_Aythya_baeri_GCA_026413565.1.COL1a2_Anas.consensus:AnsAna_Cyanochen_cyanoptera_B10K-D-WWT-10.COL1a2_Anas.consensus:AnsAna_Plectropterus_gambensis_B10…	DB Search
GETGPTGAIGPIGASGPP(+15.99)GPAGAAGPAGPR	95.74	2510.25	30	1.4	1256.13	2	33.6733	21261	20201209_Lumos_Ritcher_sample148_17.raw	587000000	3	3	Proline Oxidation	P18:Proline Oxidation:8.14	AnsAna_Lophodytes_cucullatus_B10K-D-WWT-15.COL1a2_Anas.consensus:AnsAna_Spatula_platalea_D2007020414.COL1a2_Anas.consensus:AnsAna_Spatula_smithii_GCA_035221675.1.COL1a2_Anas.consensus:AnsAna_Anas_gibberifrons_D2007020344.COL1a2_Anas.consensus:AnsAna_Aythya_baeri_GCA_026413565.1.COL1a2_Anas.consensus:AnsAna_Cyanochen_cyanoptera_B10K-D-WWT-10.COL1a2_Anas.consensus:AnsAna_Plectropterus_gambensis_B10…	DB Search
GETGPTGAIGPIGASGPPGP(+15.99)AG	81.97	1832.89	22	4	917.456	2	35.2178	22860	20201209_Lumos_Ritcher_sample148_17.raw		0	0	Proline Oxidation	P20:Proline Oxidation:14.04	AnsAna_Lophodytes_cucullatus_B10K-D-WWT-15.COL1a2_Anas.consensus:AnsAna_Spatula_platalea_D2007020414.COL1a2_Anas.consensus:AnsAna_Spatula_smithii_GCA_035221675.1.COL1a2_Anas.consensus:AnsAna_Anas_gibberifrons_D2007020344.COL1a2_Anas.consensus:AnsAna_Aythya_baeri_GCA_026413565.1.COL1a2_Anas.consensus:AnsAna_Cyanochen_cyanoptera_B10K-D-WWT-10.COL1a2_Anas.consensus:AnsAna_Plectropterus_gambensis_B10…	DB Search
GETGPTGAIGPIGASGPPGP(+15.99)AGAAGPA	86.77	2200.08	27	-0.2	734.366	3	36.9303	24435	20201209_Lumos_Ritcher_sample148_17.raw	1580000	1	1	Proline Oxidation	P20:Proline Oxidation:0.00	AnsAna_Lophodytes_cucullatus_B10K-D-WWT-15.COL1a2_Anas.consensus:AnsAna_Spatula_platalea_D2007020414.COL1a2_Anas.consensus:AnsAna_Spatula_smithii_GCA_035221675.1.COL1a2_Anas.consensus:AnsAna_Anas_gibberifrons_D2007020344.COL1a2_Anas.consensus:AnsAna_Aythya_baeri_GCA_026413565.1.COL1a2_Anas.consensus:AnsAna_Cyanochen_cyanoptera_B10K-D-WWT-10.COL1a2_Anas.consensus:AnsAna_Plectropterus_gambensis_B10…	DB Search
GETGPTGAIGPIGASGPPGPAGAAGPAGPR	91.27	2494.26	30	-0.8	832.425	3	35.206	22895	20201209_Lumos_Ritcher_sample148_17.raw	805000	1	1			AnsAna_Lophodytes_cucullatus_B10K-D-WWT-15.COL1a2_Anas.consensus:AnsAna_Spatula_platalea_D2007020414.COL1a2_Anas.consensus:AnsAna_Spatula_smithii_GCA_035221675.1.COL1a2_Anas.consensus:AnsAna_Anas_gibberifrons_D2007020344.COL1a2_Anas.consensus:AnsAna_Aythya_baeri_GCA_026413565.1.COL1a2_Anas.consensus:AnsAna_Cyanochen_cyanoptera_B10K-D-WWT-10.COL1a2_Anas.consensus:AnsAna_Plectropterus_gambensis_B10…	DB Search
GETGPTGAIGPVGASGPP(+15.99)GPAGAAGPAGPR	86.69	2496.24	30	0.4	833.086	3	33.8985	21495	20201209_Lumos_Ritcher_sample148_17.raw		0	0	Proline Oxidation	P18:Proline Oxidation:14.02	AnsAna_Anser_indicus_GCA_025583725.1.COL1a2_Anas.consensus:AnsAna_Chloephaga_poliocephala_B10K-D-IZW-11.COL1a2_Anas.consensus:AnsAna_Branta_ruficollis_D2104051282.COL1a2_Anas.consensus:AnsAna_Cygnus_olor_GCA_009769485.2.COL1a2_Anas.consensus:AnsAna_Chloephaga_rubidiceps_D2104051194.COL1a2_Anas.consensus:AnsAna_Cygnus_atratus_GCA_013377495.2.COL1a2_Anas.consensus:AnsAna_Cygnus_buccinator_GCA_01923…	DB Search
GETGPTGAIGPVGASGPPGPAGAAGPAGPR	62.91	2480.24	30	0.3	827.754	3	34.1344	21690	20201209_Lumos_Ritcher_sample148_17.raw		0	0			AnsAna_Anser_indicus_GCA_025583725.1.COL1a2_Anas.consensus:AnsAna_Chloephaga_poliocephala_B10K-D-IZW-11.COL1a2_Anas.consensus:AnsAna_Branta_ruficollis_D2104051282.COL1a2_Anas.consensus:AnsAna_Cygnus_olor_GCA_009769485.2.COL1a2_Anas.consensus:AnsAna_Chloephaga_rubidiceps_D2104051194.COL1a2_Anas.consensus:AnsAna_Cygnus_atratus_GCA_013377495.2.COL1a2_Anas.consensus:AnsAna_Cygnus_buccinator_GCA_01923…	DB Search
GFAGPPGAPGTP(+15.99)GPQ(+0.98)GIAGQ(+0.98)R	53.01	1906.92	21	-8.2	636.641	3	29.0678	16418	20201209_Lumos_Ritcher_sample148_17.raw		0	0	Proline Oxidation;Deamidation (NQ);Deamidation (NQ)	P12:Proline Oxidation:15.08;Q15:Deamidation (NQ):1000.00;Q20:Deamidation (NQ):1000.00	AnsAna_Netta_rufina_MOB-64.COL1a1_Cyg-Gall.consensus:AnsAna_Branta_leucopsis_DBGNRM65.COL1a1_Cyg-Gall.consensus	DB Search
GFM(sub S)GLQGP(+15.99)PGPPGAP(+15.99)GEQGPSGASGPAGPR	40.92	2716.27	30	0.1	906.429	3	36.7337	24467	20201209_Lumos_Ritcher_sample148_17.raw	42000	1	1	Ser->Met substitution;Proline Oxidation;Proline Oxidation	P8:Proline Oxidation:0.00;P15:Proline Oxidation:9.45	AnsAna_Spatula_discors_GCA_032165275.1.COL1a1_Cyg-Gall.consensus:AnsAna_Mareca_sibilatrix_GCA_034783215.1.COL1a1_Cyg-Gall.consensus:AnsAna_Pteronetta_hartlaubii_D2102046034.COL1a1_Cyg-Gall.consensus:AnsAna_Tachyeres_brachypterus_GCA_032357605.1.COL1a1_Cyg-Gall.consensus:AnsAna_Branta_leucopsis_DBGNRM65.COL1a1_Cyg-Gall.consensus:AnsAna_Aythya_marila_GCA_029042245.1.COL1a1_Cyg-Gall.consensus:AnsAna…	SPIDER
GFP(+15.99)GADGIAGP(+15.99)K	80.53	1117.54	12	-0.1	559.777	2	27.8859	15333	20201209_Lumos_Ritcher_sample148_17.raw		0	0	Proline Oxidation;Proline Oxidation	P3:Proline Oxidation:1000.00;P11:Proline Oxidation:1000.00	AnsAna_Anas_undulata_B10K-D-IZW-61.COL1a1_Cyg-Gall.consensus:AnsAna_Aythya_americana_D2006016050.COL1a1_Cyg-Gall.consensus:AnsAna_Cereopsis_novaehollandiae_B10K-D-IZW-75.COL1a1_Cyg-Gall.consensus:AnsAna_Branta_leucopsis_DBGNRM65.COL1a1_Cyg-Gall.consensus:AnsAna_Aythya_marila_GCA_029042245.1.COL1a1_Cyg-Gall.consensus:AnsAna_Tadorna_tadorna_DBGNRM58.COL1a1_Cyg-Gall.consensus:AnsAna_Anser_cygnoides_…	DB Search
GFP(+15.99)GADGIAGP(+15.99)KGPP(+15.99)GER	91.72	1726.83	18	-1.9	576.615	3	26.7151	14087	20201209_Lumos_Ritcher_sample148_17.raw		0	0	Proline Oxidation;Proline Oxidation;Proline Oxidation	P3:Proline Oxidation:88.86;P11:Proline Oxidation:22.45;P15:Proline Oxidation:17.01	AnsAna_Anas_undulata_B10K-D-IZW-61.COL1a1_Cyg-Gall.consensus:AnsAna_Aythya_americana_D2006016050.COL1a1_Cyg-Gall.consensus:AnsAna_Cereopsis_novaehollandiae_B10K-D-IZW-75.COL1a1_Cyg-Gall.consensus:AnsAna_Branta_leucopsis_DBGNRM65.COL1a1_Cyg-Gall.consensus:AnsAna_Aythya_marila_GCA_029042245.1.COL1a1_Cyg-Gall.consensus:AnsAna_Tadorna_tadorna_DBGNRM58.COL1a1_Cyg-Gall.consensus:AnsAna_Anser_cygnoides_…	DB Search
GFP(+15.99)GADGIAGPK	95.12	1101.55	12	0.1	551.78	2	27.8283	15273	20201209_Lumos_Ritcher_sample148_17.raw	410000000	3	3	Proline Oxidation	P3:Proline Oxidation:76.53	AnsAna_Anas_undulata_B10K-D-IZW-61.COL1a1_Cyg-Gall.consensus:AnsAna_Aythya_americana_D2006016050.COL1a1_Cyg-Gall.consensus:AnsAna_Cereopsis_novaehollandiae_B10K-D-IZW-75.COL1a1_Cyg-Gall.consensus:AnsAna_Branta_leucopsis_DBGNRM65.COL1a1_Cyg-Gall.consensus:AnsAna_Aythya_marila_GCA_029042245.1.COL1a1_Cyg-Gall.consensus:AnsAna_Tadorna_tadorna_DBGNRM58.COL1a1_Cyg-Gall.consensus:AnsAna_Anser_cygnoides_…	DB Search
GFP(+15.99)GADGIAGPKGPP(+15.99)GER	92.57	1710.83	18	-0.4	571.285	3	26.5951	13960	20201209_Lumos_Ritcher_sample148_17.raw		0	0	Proline Oxidation;Proline Oxidation	P3:Proline Oxidation:40.94;P15:Proline Oxidation:17.01	AnsAna_Anas_undulata_B10K-D-IZW-61.COL1a1_Cyg-Gall.consensus:AnsAna_Aythya_americana_D2006016050.COL1a1_Cyg-Gall.consensus:AnsAna_Cereopsis_novaehollandiae_B10K-D-IZW-75.COL1a1_Cyg-Gall.consensus:AnsAna_Branta_leucopsis_DBGNRM65.COL1a1_Cyg-Gall.consensus:AnsAna_Aythya_marila_GCA_029042245.1.COL1a1_Cyg-Gall.consensus:AnsAna_Tadorna_tadorna_DBGNRM58.COL1a1_Cyg-Gall.consensus:AnsAna_Anser_cygnoides_…	DB Search
GFP(+15.99)GLP(+15.99)GPSGEP(+15.99)GK	75.51	1343.64	14	0	672.825	2	30.8965	18327	20201209_Lumos_Ritcher_sample148_17.raw	243000000	3	3	Proline Oxidation;Proline Oxidation;Proline Oxidation	P3:Proline Oxidation:98.37;P6:Proline Oxidation:32.28;P12:Proline Oxidation:26.57	AnsAna_Anas_undulata_B10K-D-IZW-61.COL1a1_Cyg-Gall.consensus:AnsAna_Aythya_americana_D2006016050.COL1a1_Cyg-Gall.consensus:AnsAna_Cereopsis_novaehollandiae_B10K-D-IZW-75.COL1a1_Cyg-Gall.consensus:AnsAna_Branta_leucopsis_DBGNRM65.COL1a1_Cyg-Gall.consensus:AnsAna_Aythya_marila_GCA_029042245.1.COL1a1_Cyg-Gall.consensus:AnsAna_Tadorna_tadorna_DBGNRM58.COL1a1_Cyg-Gall.consensus:AnsAna_Anser_cygnoides_…	DB Search
GFP(+15.99)GLP(+15.99)GPSGEPGK	91.8	1327.64	14	1.3	664.829	2	31.7465	18853	20201209_Lumos_Ritcher_sample148_17.raw	246000000	1	1	Proline Oxidation;Proline Oxidation	P3:Proline Oxidation:89.05;P6:Proline Oxidation:27.16	AnsAna_Anas_undulata_B10K-D-IZW-61.COL1a1_Cyg-Gall.consensus:AnsAna_Aythya_americana_D2006016050.COL1a1_Cyg-Gall.consensus:AnsAna_Cereopsis_novaehollandiae_B10K-D-IZW-75.COL1a1_Cyg-Gall.consensus:AnsAna_Branta_leucopsis_DBGNRM65.COL1a1_Cyg-Gall.consensus:AnsAna_Aythya_marila_GCA_029042245.1.COL1a1_Cyg-Gall.consensus:AnsAna_Tadorna_tadorna_DBGNRM58.COL1a1_Cyg-Gall.consensus:AnsAna_Anser_cygnoides_…	DB Search
GFP(+15.99)GLP(+15.99)GPSGEPGKQ(+0.98)GPSGSPGER	89.62	2281.06	24	-0.5	761.361	3	29.54	16926	20201209_Lumos_Ritcher_sample148_17.raw		0	0	Proline Oxidation;Proline Oxidation;Deamidation (NQ)	P3:Proline Oxidation:68.60;P6:Proline Oxidation:22.85;Q15:Deamidation (NQ):1000.00	AnsAna_Anas_undulata_B10K-D-IZW-61.COL1a1_Cyg-Gall.consensus:AnsAna_Aythya_americana_D2006016050.COL1a1_Cyg-Gall.consensus:AnsAna_Cereopsis_novaehollandiae_B10K-D-IZW-75.COL1a1_Cyg-Gall.consensus:AnsAna_Branta_leucopsis_DBGNRM65.COL1a1_Cyg-Gall.consensus:AnsAna_Aythya_marila_GCA_029042245.1.COL1a1_Cyg-Gall.consensus:AnsAna_Tadorna_tadorna_DBGNRM58.COL1a1_Cyg-Gall.consensus:AnsAna_Anser_cygnoides_…	DB Search
GFP(+15.99)GLP(+15.99)GPSGEPGKQGAP(+15.99)GSAGDRG	70.35	2297.07	25	-5.3	766.692	3	28.8157	16305	20201209_Lumos_Ritcher_sample148_17.raw	6730000	1	1	Proline Oxidation;Proline Oxidation;Proline Oxidation	P3:Proline Oxidation:98.37;P6:Proline Oxidation:22.85;P18:Proline Oxidation:13.13	sp|P02460|CO2A1_CHICK	DB Search
GFP(+15.99)GLPGPSGEP(+15.99)GK	42.59	1327.64	14	0	664.828	2	32.6445	20672	20201209_Lumos_Ritcher_sample148_17.raw	17100000	1	1	Proline Oxidation;Proline Oxidation	P3:Proline Oxidation:0.00;P12:Proline Oxidation:12.14	AnsAna_Anas_undulata_B10K-D-IZW-61.COL1a1_Cyg-Gall.consensus:AnsAna_Aythya_americana_D2006016050.COL1a1_Cyg-Gall.consensus:AnsAna_Cereopsis_novaehollandiae_B10K-D-IZW-75.COL1a1_Cyg-Gall.consensus:AnsAna_Branta_leucopsis_DBGNRM65.COL1a1_Cyg-Gall.consensus:AnsAna_Aythya_marila_GCA_029042245.1.COL1a1_Cyg-Gall.consensus:AnsAna_Tadorna_tadorna_DBGNRM58.COL1a1_Cyg-Gall.consensus:AnsAna_Anser_cygnoides_…	DB Search
GFP(+15.99)GTP(+15.99)GLP(+15.99)GFK	95.01	1221.6	12	-0.7	611.808	2	36.5931	24342	20201209_Lumos_Ritcher_sample148_17.raw	39100000	1	1	Proline Oxidation;Proline Oxidation;Proline Oxidation	P3:Proline Oxidation:1000.00;P6:Proline Oxidation:1000.00;P9:Proline Oxidation:1000.00	AnsAna_Spatula_platalea_D2007020414.COL1a2_Anas.consensus:AnsAna_Chloephaga_rubidiceps_D2104051194.COL1a2_Anas.consensus:AnsAna_Cygnus_atratus_GCA_013377495.2.COL1a2_Anas.consensus:AnsAna_Plectropterus_gambensis_B10K-D-WWT-22.COL1a2_Anas.consensus:AnsAna_Aythya_affinis_CL200153793_L02.COL1a2_Anas.consensus:AnsAna_Somateria_spectabilis_D2006016067.COL1a2_Anas.consensus:AnsAna_Dendrocygna_guttata_B…	DB Search
GFP(+15.99)GTP(+15.99)GLP(+15.99)GFKGIR	93.74	1547.81	15	0.1	516.944	3	34.7066	22402	20201209_Lumos_Ritcher_sample148_17.raw	68600	1	1	Proline Oxidation;Proline Oxidation;Proline Oxidation	P3:Proline Oxidation:1000.00;P6:Proline Oxidation:1000.00;P9:Proline Oxidation:1000.00	AnsAna_Spatula_platalea_D2007020414.COL1a2_Anas.consensus:AnsAna_Chloephaga_rubidiceps_D2104051194.COL1a2_Anas.consensus:AnsAna_Cygnus_atratus_GCA_013377495.2.COL1a2_Anas.consensus:AnsAna_Plectropterus_gambensis_B10K-D-WWT-22.COL1a2_Anas.consensus:AnsAna_Aythya_affinis_CL200153793_L02.COL1a2_Anas.consensus:AnsAna_Somateria_spectabilis_D2006016067.COL1a2_Anas.consensus:AnsAna_Dendrocygna_guttata_B…	DB Search
GFPGLP(+15.99)GPSGEP(+15.99)GK	89.17	1327.64	14	0	664.828	2	32.6445	20064	20201209_Lumos_Ritcher_sample148_17.raw	17100000	1	1	Proline Oxidation;Proline Oxidation	P6:Proline Oxidation:25.66;P12:Proline Oxidation:48.97	AnsAna_Anas_undulata_B10K-D-IZW-61.COL1a1_Cyg-Gall.consensus:AnsAna_Aythya_americana_D2006016050.COL1a1_Cyg-Gall.consensus:AnsAna_Cereopsis_novaehollandiae_B10K-D-IZW-75.COL1a1_Cyg-Gall.consensus:AnsAna_Branta_leucopsis_DBGNRM65.COL1a1_Cyg-Gall.consensus:AnsAna_Aythya_marila_GCA_029042245.1.COL1a1_Cyg-Gall.consensus:AnsAna_Tadorna_tadorna_DBGNRM58.COL1a1_Cyg-Gall.consensus:AnsAna_Anser_cygnoides_…	DB Search
GFPGLP(+15.99)GPSGEP(+15.99)GKQ(+0.98)GPSGSPGER	99.93	2281.06	24	-0.9	761.36	3	30.4259	17858	20201209_Lumos_Ritcher_sample148_17.raw		0	0	Proline Oxidation;Proline Oxidation;Deamidation (NQ)	P6:Proline Oxidation:14.04;P12:Proline Oxidation:11.65;Q15:Deamidation (NQ):1000.00	AnsAna_Anas_undulata_B10K-D-IZW-61.COL1a1_Cyg-Gall.consensus:AnsAna_Aythya_americana_D2006016050.COL1a1_Cyg-Gall.consensus:AnsAna_Cereopsis_novaehollandiae_B10K-D-IZW-75.COL1a1_Cyg-Gall.consensus:AnsAna_Branta_leucopsis_DBGNRM65.COL1a1_Cyg-Gall.consensus:AnsAna_Aythya_marila_GCA_029042245.1.COL1a1_Cyg-Gall.consensus:AnsAna_Tadorna_tadorna_DBGNRM58.COL1a1_Cyg-Gall.consensus:AnsAna_Anser_cygnoides_…	DB Search
GFPGLP(+15.99)GPSGEPGK	85.79	1311.65	14	-0.4	656.83	2	33.8587	21512	20201209_Lumos_Ritcher_sample148_17.raw	7280000	1	1	Proline Oxidation	P6:Proline Oxidation:25.66	AnsAna_Anas_undulata_B10K-D-IZW-61.COL1a1_Cyg-Gall.consensus:AnsAna_Aythya_americana_D2006016050.COL1a1_Cyg-Gall.consensus:AnsAna_Cereopsis_novaehollandiae_B10K-D-IZW-75.COL1a1_Cyg-Gall.consensus:AnsAna_Branta_leucopsis_DBGNRM65.COL1a1_Cyg-Gall.consensus:AnsAna_Aythya_marila_GCA_029042245.1.COL1a1_Cyg-Gall.consensus:AnsAna_Tadorna_tadorna_DBGNRM58.COL1a1_Cyg-Gall.consensus:AnsAna_Anser_cygnoides_…	DB Search
GFQGLP(+15.99)GPSGPAGEAGKP(+15.99)GER	93.86	1996.96	21	-2.5	666.659	3	26.9103	14299	20201209_Lumos_Ritcher_sample148_17.raw		0	0	Proline Oxidation;Proline Oxidation	P6:Proline Oxidation:26.31;P18:Proline Oxidation:31.93	AnsAna_Spatula_platalea_D2007020414.COL1a2_Anas.consensus:AnsAna_Chloephaga_rubidiceps_D2104051194.COL1a2_Anas.consensus:AnsAna_Cygnus_atratus_GCA_013377495.2.COL1a2_Anas.consensus:AnsAna_Plectropterus_gambensis_B10K-D-WWT-22.COL1a2_Anas.consensus:AnsAna_Aythya_affinis_CL200153793_L02.COL1a2_Anas.consensus:AnsAna_Somateria_spectabilis_D2006016067.COL1a2_Anas.consensus:AnsAna_Dendrocygna_guttata_B…	DB Search
GFQGLP(+15.99)GPSGPAGEAGKPGERGLHGEFGVPGP(+15.99)AGPR	50.01	3425.69	36	-0.8	857.428	4	28.2949	15704	20201209_Lumos_Ritcher_sample148_17.raw	563000	1	1	Proline Oxidation;Proline Oxidation	P6:Proline Oxidation:0.00;P32:Proline Oxidation:3.64	AnsAna_Spatula_platalea_D2007020414.COL1a2_Anas.consensus:AnsAna_Chloephaga_rubidiceps_D2104051194.COL1a2_Anas.consensus:AnsAna_Cygnus_atratus_GCA_013377495.2.COL1a2_Anas.consensus:AnsAna_Plectropterus_gambensis_B10K-D-WWT-22.COL1a2_Anas.consensus:AnsAna_Aythya_affinis_CL200153793_L02.COL1a2_Anas.consensus:AnsAna_Somateria_spectabilis_D2006016067.COL1a2_Anas.consensus:AnsAna_Dendrocygna_guttata_B…	DB Search
GFSGF(sub L)QGPPGPPGAP(+15.99)GEQGPSGASGPAGPR	41.28	2690.25	30	-2.6	897.754	3	32.9355	21039	20201209_Lumos_Ritcher_sample148_17.raw	5780000	1	1	Leu->Phe substitution;Proline Oxidation	P15:Proline Oxidation:8.82	AnsAna_Spatula_discors_GCA_032165275.1.COL1a1_Cyg-Gall.consensus:AnsAna_Mareca_sibilatrix_GCA_034783215.1.COL1a1_Cyg-Gall.consensus:AnsAna_Pteronetta_hartlaubii_D2102046034.COL1a1_Cyg-Gall.consensus:AnsAna_Tachyeres_brachypterus_GCA_032357605.1.COL1a1_Cyg-Gall.consensus:AnsAna_Branta_leucopsis_DBGNRM65.COL1a1_Cyg-Gall.consensus:AnsAna_Aythya_marila_GCA_029042245.1.COL1a1_Cyg-Gall.consensus:AnsAna…	SPIDER
GFSGLDGAKGEP(+15.99)GP(+15.99)AGP(+15.99)K	61.88	1688.8	18	-0.3	563.941	3	24.2663	11594	20201209_Lumos_Ritcher_sample148_17.raw		0	0	Proline Oxidation;Proline Oxidation;Proline Oxidation	P12:Proline Oxidation:1000.00;P14:Proline Oxidation:1000.00;P17:Proline Oxidation:1000.00	AnsAna_Anas_undulata_B10K-D-IZW-61.COL1a1_Cyg-Gall.consensus:AnsAna_Aythya_americana_D2006016050.COL1a1_Cyg-Gall.consensus:AnsAna_Aythya_marila_GCA_029042245.1.COL1a1_Cyg-Gall.consensus:AnsAna_Anser_cygnoides_GCA_025388735.1.COL1a1_Cyg-Gall.consensus:AnsAna_Branta_hutchinsii_GCA_032270845.1.COL1a1_Cyg-Gall.consensus:AnsAna_Spatula_querquedula_GCA_032191525.1.COL1a1_Cyg-Gall.consensus:AnsAna_Aix_g…	DB Search
GFSGLDGAKGEP(+15.99)GP(+15.99)AGPK	85.59	1672.81	18	-0.6	837.41	2	24.6455	11915	20201209_Lumos_Ritcher_sample148_17.raw	16100000	3	3	Proline Oxidation;Proline Oxidation	P12:Proline Oxidation:30.64;P14:Proline Oxidation:38.16	AnsAna_Anas_undulata_B10K-D-IZW-61.COL1a1_Cyg-Gall.consensus:AnsAna_Aythya_americana_D2006016050.COL1a1_Cyg-Gall.consensus:AnsAna_Aythya_marila_GCA_029042245.1.COL1a1_Cyg-Gall.consensus:AnsAna_Anser_cygnoides_GCA_025388735.1.COL1a1_Cyg-Gall.consensus:AnsAna_Branta_hutchinsii_GCA_032270845.1.COL1a1_Cyg-Gall.consensus:AnsAna_Spatula_querquedula_GCA_032191525.1.COL1a1_Cyg-Gall.consensus:AnsAna_Aix_g…	DB Search
GFSGLDGAKGEPGP(+15.99)AGP(+15.99)K	91.39	1672.81	18	0.1	558.609	3	24.6953	11755	20201209_Lumos_Ritcher_sample148_17.raw	16800000	2	2	Proline Oxidation;Proline Oxidation	P14:Proline Oxidation:14.04;P17:Proline Oxidation:0.00	AnsAna_Anas_undulata_B10K-D-IZW-61.COL1a1_Cyg-Gall.consensus:AnsAna_Aythya_americana_D2006016050.COL1a1_Cyg-Gall.consensus:AnsAna_Aythya_marila_GCA_029042245.1.COL1a1_Cyg-Gall.consensus:AnsAna_Anser_cygnoides_GCA_025388735.1.COL1a1_Cyg-Gall.consensus:AnsAna_Branta_hutchinsii_GCA_032270845.1.COL1a1_Cyg-Gall.consensus:AnsAna_Spatula_querquedula_GCA_032191525.1.COL1a1_Cyg-Gall.consensus:AnsAna_Aix_g…	DB Search
GFSGLQ(+0.98)GP(+15.99)P(+15.99)GPPGSPGEQGPSGASGPAGPR	90.78	2689.24	30	-9.4	897.411	3	38.5432	26189	20201209_Lumos_Ritcher_sample148_17.raw	351000	1	1	Deamidation (NQ);Proline Oxidation;Proline Oxidation	Q6:Deamidation (NQ):0.00;P8:Proline Oxidation:22.45;P9:Proline Oxidation:14.04	AnsAna_Aix_sponsa_GCA_032270905.1.COL1a1_Cyg-Gall.consensus	DB Search
GFSGLQ(+0.98)GP(+15.99)PGPPGAPGEQ(+0.98)GPSGASGPAGPR	90.63	2658.23	30	0.3	887.085	3	34.7564	22539	20201209_Lumos_Ritcher_sample148_17.raw	485000	1	1	Deamidation (NQ);Proline Oxidation;Deamidation (NQ)	Q6:Deamidation (NQ):1000.00;P8:Proline Oxidation:0.00;Q18:Deamidation (NQ):1000.00	AnsAna_Anas_undulata_B10K-D-IZW-61.COL1a1_Cyg-Gall.consensus:AnsAna_Aythya_americana_D2006016050.COL1a1_Cyg-Gall.consensus:AnsAna_Pteronetta_hartlaubii_D2102046034.COL1a1_Cyg-Gall.consensus:AnsAna_Cereopsis_novaehollandiae_B10K-D-IZW-75.COL1a1_Cyg-Gall.consensus:AnsAna_Branta_leucopsis_DBGNRM65.COL1a1_Cyg-Gall.consensus:AnsAna_Aythya_marila_GCA_029042245.1.COL1a1_Cyg-Gall.consensus:AnsAna_Tadorna…	DB Search
GFSGLQ(+0.98)GP(+15.99)PGPPGSP(+15.99)GEQGPSGASGPAGPR	89.19	2689.24	30	7.2	1345.64	2	32.6559	20235	20201209_Lumos_Ritcher_sample148_17.raw		0	0	Deamidation (NQ);Proline Oxidation;Proline Oxidation	Q6:Deamidation (NQ):18.26;P8:Proline Oxidation:0.00;P15:Proline Oxidation:14.62	AnsAna_Aix_sponsa_GCA_032270905.1.COL1a1_Cyg-Gall.consensus	DB Search
GFSGLQ(+0.98)GPP(+15.99)GPP(+15.99)GAP(+15.99)GEQ(+0.98)GPSGASGPAGPR	41.89	2690.22	30	0.2	897.748	3	32.2492	19789	20201209_Lumos_Ritcher_sample148_17.raw	76700000	2	2	Deamidation (NQ);Proline Oxidation;Proline Oxidation;Proline Oxidation;Deamidation (NQ)	Q6:Deamidation (NQ):1000.00;P9:Proline Oxidation:20.00;P12:Proline Oxidation:27.96;P15:Proline Oxidation:65.72;Q18:Deamidation (NQ):1000.00	AnsAna_Spatula_discors_GCA_032165275.1.COL1a1_Cyg-Gall.consensus:AnsAna_Mareca_sibilatrix_GCA_034783215.1.COL1a1_Cyg-Gall.consensus:AnsAna_Pteronetta_hartlaubii_D2102046034.COL1a1_Cyg-Gall.consensus:AnsAna_Tachyeres_brachypterus_GCA_032357605.1.COL1a1_Cyg-Gall.consensus:AnsAna_Branta_leucopsis_DBGNRM65.COL1a1_Cyg-Gall.consensus:AnsAna_Aythya_marila_GCA_029042245.1.COL1a1_Cyg-Gall.consensus:AnsAna…	SPIDER
GFSGLQ(+0.98)GPP(+15.99)GPPGAP(+15.99)GEQGPSGASGPAGPR	93.56	2673.24	30	-0.3	892.088	3	32.694	20732	20201209_Lumos_Ritcher_sample148_17.raw	41100000	2	2	Deamidation (NQ);Proline Oxidation;Proline Oxidation	Q6:Deamidation (NQ):122.18;P9:Proline Oxidation:20.92;P15:Proline Oxidation:10.18	AnsAna_Anas_undulata_B10K-D-IZW-61.COL1a1_Cyg-Gall.consensus:AnsAna_Aythya_americana_D2006016050.COL1a1_Cyg-Gall.consensus:AnsAna_Pteronetta_hartlaubii_D2102046034.COL1a1_Cyg-Gall.consensus:AnsAna_Cereopsis_novaehollandiae_B10K-D-IZW-75.COL1a1_Cyg-Gall.consensus:AnsAna_Branta_leucopsis_DBGNRM65.COL1a1_Cyg-Gall.consensus:AnsAna_Aythya_marila_GCA_029042245.1.COL1a1_Cyg-Gall.consensus:AnsAna_Tadorna…	DB Search
GFSGLQ(+0.98)GPP(+15.99)GPPGSP(+15.99)GEQGPSGASGPAGPR	94.57	2689.24	30	-0.6	897.419	3	33.2337	20879	20201209_Lumos_Ritcher_sample148_17.raw	30700000	3	3	Deamidation (NQ);Proline Oxidation;Proline Oxidation	Q6:Deamidation (NQ):115.90;P9:Proline Oxidation:24.44;P15:Proline Oxidation:28.36	AnsAna_Aix_sponsa_GCA_032270905.1.COL1a1_Cyg-Gall.consensus	DB Search
GFSGLQ(+0.98)GPP(+15.99)GPPGSPGEQ(+0.98)GPSGASGPAGPR	91.28	2674.23	30	-2.4	1338.12	2	33.4375	21053	20201209_Lumos_Ritcher_sample148_17.raw		0	0	Deamidation (NQ);Proline Oxidation;Deamidation (NQ)	Q6:Deamidation (NQ):1000.00;P9:Proline Oxidation:10.11;Q18:Deamidation (NQ):1000.00	AnsAna_Aix_sponsa_GCA_032270905.1.COL1a1_Cyg-Gall.consensus	DB Search
GFSGLQ(+0.98)GPPGPPGSP(+15.99)GEQ(+0.98)GPSGASGPAGPR	93.12	2674.23	30	-0.6	892.415	3	34.8566	22340	20201209_Lumos_Ritcher_sample148_17.raw	878000	1	1	Deamidation (NQ);Proline Oxidation;Deamidation (NQ)	Q6:Deamidation (NQ):1000.00;P15:Proline Oxidation:22.09;Q18:Deamidation (NQ):1000.00	AnsAna_Aix_sponsa_GCA_032270905.1.COL1a1_Cyg-Gall.consensus	DB Search
GFSGLQ(+0.98)GPPGPPGSPGEQGPSGASGPAGPR	90.68	2657.25	30	-0.9	886.755	3	34.4327	22007	20201209_Lumos_Ritcher_sample148_17.raw		0	0	Deamidation (NQ)	Q6:Deamidation (NQ):16.22	AnsAna_Aix_sponsa_GCA_032270905.1.COL1a1_Cyg-Gall.consensus	DB Search
GFSGLQGP(+15.99)P(+15.99)GPPGAP(+15.99)GEQGPSGASGPAGPR	89.27	2688.25	30	-3.7	897.088	3	39.5725	27445	20201209_Lumos_Ritcher_sample148_17.raw	21300	1	1	Proline Oxidation;Proline Oxidation;Proline Oxidation	P8:Proline Oxidation:12.33;P9:Proline Oxidation:14.04;P15:Proline Oxidation:11.12	AnsAna_Anas_undulata_B10K-D-IZW-61.COL1a1_Cyg-Gall.consensus:AnsAna_Aythya_americana_D2006016050.COL1a1_Cyg-Gall.consensus:AnsAna_Pteronetta_hartlaubii_D2102046034.COL1a1_Cyg-Gall.consensus:AnsAna_Cereopsis_novaehollandiae_B10K-D-IZW-75.COL1a1_Cyg-Gall.consensus:AnsAna_Branta_leucopsis_DBGNRM65.COL1a1_Cyg-Gall.consensus:AnsAna_Aythya_marila_GCA_029042245.1.COL1a1_Cyg-Gall.consensus:AnsAna_Tadorna…	DB Search
GFSGLQGP(+15.99)P(+15.99)GPPGSP(+15.99)GEQGPSGASGPAGPR	91.43	2704.25	30	-1.3	902.422	3	29.8353	17134	20201209_Lumos_Ritcher_sample148_17.raw	2220000	1	1	Proline Oxidation;Proline Oxidation;Proline Oxidation	P8:Proline Oxidation:7.77;P9:Proline Oxidation:9.40;P15:Proline Oxidation:19.05	AnsAna_Aix_sponsa_GCA_032270905.1.COL1a1_Cyg-Gall.consensus	DB Search
GFSGLQGP(+15.99)PGP(+15.99)PGSP(+15.99)GEQGPSGASGPAGPR	79.5	2704.25	30	-3.5	902.42	3	26.4769	13828	20201209_Lumos_Ritcher_sample148_17.raw		0	0	Proline Oxidation;Proline Oxidation;Proline Oxidation	P8:Proline Oxidation:0.00;P11:Proline Oxidation:0.00;P15:Proline Oxidation:22.45	AnsAna_Aix_sponsa_GCA_032270905.1.COL1a1_Cyg-Gall.consensus	DB Search
GFSGLQGP(+15.99)PGPP(+15.99)GAP(+15.99)GEQGPSGASGPAGPR	81.81	2688.25	30	-9.9	897.083	3	33.8707	21471	20201209_Lumos_Ritcher_sample148_17.raw		0	0	Proline Oxidation;Proline Oxidation;Proline Oxidation	P8:Proline Oxidation:0.00;P12:Proline Oxidation:5.08;P15:Proline Oxidation:2.81	AnsAna_Anas_undulata_B10K-D-IZW-61.COL1a1_Cyg-Gall.consensus:AnsAna_Aythya_americana_D2006016050.COL1a1_Cyg-Gall.consensus:AnsAna_Pteronetta_hartlaubii_D2102046034.COL1a1_Cyg-Gall.consensus:AnsAna_Cereopsis_novaehollandiae_B10K-D-IZW-75.COL1a1_Cyg-Gall.consensus:AnsAna_Branta_leucopsis_DBGNRM65.COL1a1_Cyg-Gall.consensus:AnsAna_Aythya_marila_GCA_029042245.1.COL1a1_Cyg-Gall.consensus:AnsAna_Tadorna…	DB Search
GFSGLQGP(+15.99)PGPP(+15.99)GSP(+15.99)GEQGPSGASGPAGPR	101.66	2704.25	30	-7	902.417	3	28.025	15621	20201209_Lumos_Ritcher_sample148_17.raw	604000	2	2	Proline Oxidation;Proline Oxidation;Proline Oxidation	P8:Proline Oxidation:0.00;P12:Proline Oxidation:7.21;P15:Proline Oxidation:16.51	AnsAna_Aix_sponsa_GCA_032270905.1.COL1a1_Cyg-Gall.consensus	DB Search
GFSGLQGP(+15.99)PGPP(+15.99)GSPGEQGPSGASGPAGPR	42.2	2688.25	30	-2.1	897.09	3	79.0071	49108	20201209_Lumos_Ritcher_sample148_17.raw	13400	1	1	Proline Oxidation;Proline Oxidation	P8:Proline Oxidation:0.00;P12:Proline Oxidation:0.00	AnsAna_Aix_sponsa_GCA_032270905.1.COL1a1_Cyg-Gall.consensus	DB Search
GFSGLQGP(+15.99)PGPPGAP(+15.99)GEQ(+0.98)GPSGASGPAGPR	94.54	2673.24	30	-0.2	892.088	3	34.1153	21621	20201209_Lumos_Ritcher_sample148_17.raw	968000	1	1	Proline Oxidation;Proline Oxidation;Deamidation (NQ)	P8:Proline Oxidation:0.00;P15:Proline Oxidation:22.45;Q18:Deamidation (NQ):100.30	AnsAna_Anas_undulata_B10K-D-IZW-61.COL1a1_Cyg-Gall.consensus:AnsAna_Aythya_americana_D2006016050.COL1a1_Cyg-Gall.consensus:AnsAna_Pteronetta_hartlaubii_D2102046034.COL1a1_Cyg-Gall.consensus:AnsAna_Cereopsis_novaehollandiae_B10K-D-IZW-75.COL1a1_Cyg-Gall.consensus:AnsAna_Branta_leucopsis_DBGNRM65.COL1a1_Cyg-Gall.consensus:AnsAna_Aythya_marila_GCA_029042245.1.COL1a1_Cyg-Gall.consensus:AnsAna_Tadorna…	DB Search
GFSGLQGP(+15.99)PGPPGAP(+15.99)GEQGPSGASGPAGPR	93.63	2672.26	30	-7.5	891.753	3	33.9704	21552	20201209_Lumos_Ritcher_sample148_17.raw	626000	1	1	Proline Oxidation;Proline Oxidation	P8:Proline Oxidation:0.00;P15:Proline Oxidation:11.12	AnsAna_Anas_undulata_B10K-D-IZW-61.COL1a1_Cyg-Gall.consensus:AnsAna_Aythya_americana_D2006016050.COL1a1_Cyg-Gall.consensus:AnsAna_Pteronetta_hartlaubii_D2102046034.COL1a1_Cyg-Gall.consensus:AnsAna_Cereopsis_novaehollandiae_B10K-D-IZW-75.COL1a1_Cyg-Gall.consensus:AnsAna_Branta_leucopsis_DBGNRM65.COL1a1_Cyg-Gall.consensus:AnsAna_Aythya_marila_GCA_029042245.1.COL1a1_Cyg-Gall.consensus:AnsAna_Tadorna…	DB Search
GFSGLQGP(+15.99)PGPPGAPGEQGPSGASGPAGPR	90.76	2656.26	30	-3.7	886.425	3	34.817	22430	20201209_Lumos_Ritcher_sample148_17.raw		0	0	Proline Oxidation	P8:Proline Oxidation:0.00	AnsAna_Anas_undulata_B10K-D-IZW-61.COL1a1_Cyg-Gall.consensus:AnsAna_Aythya_americana_D2006016050.COL1a1_Cyg-Gall.consensus:AnsAna_Pteronetta_hartlaubii_D2102046034.COL1a1_Cyg-Gall.consensus:AnsAna_Cereopsis_novaehollandiae_B10K-D-IZW-75.COL1a1_Cyg-Gall.consensus:AnsAna_Branta_leucopsis_DBGNRM65.COL1a1_Cyg-Gall.consensus:AnsAna_Aythya_marila_GCA_029042245.1.COL1a1_Cyg-Gall.consensus:AnsAna_Tadorna…	DB Search
GFSGLQGP(+15.99)PGPPGSP(+15.99)GEQ(+0.98)GPSGASGPAGPR	94.06	2689.24	30	-9.4	897.411	3	38.5432	26285	20201209_Lumos_Ritcher_sample148_17.raw	351000	1	1	Proline Oxidation;Proline Oxidation;Deamidation (NQ)	P8:Proline Oxidation:0.00;P15:Proline Oxidation:3.23;Q18:Deamidation (NQ):40.43	AnsAna_Aix_sponsa_GCA_032270905.1.COL1a1_Cyg-Gall.consensus	DB Search
GFSGLQGPP(+15.99)GP(+15.99)PGAP(+15.99)GEQGPSGASGPAGPR	91.91	2688.25	30	0.1	897.092	3	32.49	20343	20201209_Lumos_Ritcher_sample148_17.raw	3000000	1	1	Proline Oxidation;Proline Oxidation;Proline Oxidation	P9:Proline Oxidation:7.65;P11:Proline Oxidation:0.00;P15:Proline Oxidation:26.52	AnsAna_Anas_undulata_B10K-D-IZW-61.COL1a1_Cyg-Gall.consensus:AnsAna_Aythya_americana_D2006016050.COL1a1_Cyg-Gall.consensus:AnsAna_Pteronetta_hartlaubii_D2102046034.COL1a1_Cyg-Gall.consensus:AnsAna_Cereopsis_novaehollandiae_B10K-D-IZW-75.COL1a1_Cyg-Gall.consensus:AnsAna_Branta_leucopsis_DBGNRM65.COL1a1_Cyg-Gall.consensus:AnsAna_Aythya_marila_GCA_029042245.1.COL1a1_Cyg-Gall.consensus:AnsAna_Tadorna…	DB Search
GFSGLQGPP(+15.99)GPP(+15.99)GAP(+15.99)GEQGPSGASGPAGPR	91.12	2688.25	30	0	1345.13	2	31.0433	18244	20201209_Lumos_Ritcher_sample148_17.raw	16900000	1	1	Proline Oxidation;Proline Oxidation;Proline Oxidation	P9:Proline Oxidation:30.46;P12:Proline Oxidation:7.21;P15:Proline Oxidation:52.34	AnsAna_Anas_undulata_B10K-D-IZW-61.COL1a1_Cyg-Gall.consensus:AnsAna_Aythya_americana_D2006016050.COL1a1_Cyg-Gall.consensus:AnsAna_Pteronetta_hartlaubii_D2102046034.COL1a1_Cyg-Gall.consensus:AnsAna_Cereopsis_novaehollandiae_B10K-D-IZW-75.COL1a1_Cyg-Gall.consensus:AnsAna_Branta_leucopsis_DBGNRM65.COL1a1_Cyg-Gall.consensus:AnsAna_Aythya_marila_GCA_029042245.1.COL1a1_Cyg-Gall.consensus:AnsAna_Tadorna…	DB Search
GFSGLQGPP(+15.99)GPP(+15.99)GSP(+15.99)GEQGPSGASGPAGPR	101.43	2704.25	30	-0.4	902.423	3	30.5689	17743	20201209_Lumos_Ritcher_sample148_17.raw	2960000	3	3	Proline Oxidation;Proline Oxidation;Proline Oxidation	P9:Proline Oxidation:0.00;P12:Proline Oxidation:0.00;P15:Proline Oxidation:8.82	AnsAna_Aix_sponsa_GCA_032270905.1.COL1a1_Cyg-Gall.consensus	DB Search
GFSGLQGPP(+15.99)GPP(+15.99)GSPGEQ(+0.98)GPSGASGPAGPR	91.14	2689.24	30	0.1	1345.63	2	31.6631	18910	20201209_Lumos_Ritcher_sample148_17.raw	15100000	1	1	Proline Oxidation;Proline Oxidation;Deamidation (NQ)	P9:Proline Oxidation:23.10;P12:Proline Oxidation:20.00;Q18:Deamidation (NQ):196.21	AnsAna_Aix_sponsa_GCA_032270905.1.COL1a1_Cyg-Gall.consensus	DB Search
GFSGLQGPP(+15.99)GPPGAP(+15.99)GEQ(+0.98)GPSGA	75.38	2050.92	23	-3.1	1026.47	2	34.9314	22559	20201209_Lumos_Ritcher_sample148_17.raw		0	0	Proline Oxidation;Proline Oxidation;Deamidation (NQ)	P9:Proline Oxidation:14.02;P15:Proline Oxidation:9.86;Q18:Deamidation (NQ):40.04	AnsAna_Anas_undulata_B10K-D-IZW-61.COL1a1_Cyg-Gall.consensus:AnsAna_Aythya_americana_D2006016050.COL1a1_Cyg-Gall.consensus:AnsAna_Pteronetta_hartlaubii_D2102046034.COL1a1_Cyg-Gall.consensus:AnsAna_Cereopsis_novaehollandiae_B10K-D-IZW-75.COL1a1_Cyg-Gall.consensus:AnsAna_Branta_leucopsis_DBGNRM65.COL1a1_Cyg-Gall.consensus:AnsAna_Aythya_marila_GCA_029042245.1.COL1a1_Cyg-Gall.consensus:AnsAna_Tadorna…	DB Search
GFSGLQGPP(+15.99)GPPGAP(+15.99)GEQ(+0.98)GPSGASGPAGPR	94.29	2673.24	30	-5.7	1337.62	2	33.3701	20986	20201209_Lumos_Ritcher_sample148_17.raw		0	0	Proline Oxidation;Proline Oxidation;Deamidation (NQ)	P9:Proline Oxidation:14.02;P15:Proline Oxidation:12.33;Q18:Deamidation (NQ):45.10	AnsAna_Anas_undulata_B10K-D-IZW-61.COL1a1_Cyg-Gall.consensus:AnsAna_Aythya_americana_D2006016050.COL1a1_Cyg-Gall.consensus:AnsAna_Pteronetta_hartlaubii_D2102046034.COL1a1_Cyg-Gall.consensus:AnsAna_Cereopsis_novaehollandiae_B10K-D-IZW-75.COL1a1_Cyg-Gall.consensus:AnsAna_Branta_leucopsis_DBGNRM65.COL1a1_Cyg-Gall.consensus:AnsAna_Aythya_marila_GCA_029042245.1.COL1a1_Cyg-Gall.consensus:AnsAna_Tadorna…	DB Search
GFSGLQGPP(+15.99)GPPGAP(+15.99)GEQGPSGASGPAGPR	94.8	2672.26	30	-4.1	1337.13	2	33.6625	21217	20201209_Lumos_Ritcher_sample148_17.raw	5960000	3	3	Proline Oxidation;Proline Oxidation	P9:Proline Oxidation:11.06;P15:Proline Oxidation:38.16	AnsAna_Anas_undulata_B10K-D-IZW-61.COL1a1_Cyg-Gall.consensus:AnsAna_Aythya_americana_D2006016050.COL1a1_Cyg-Gall.consensus:AnsAna_Pteronetta_hartlaubii_D2102046034.COL1a1_Cyg-Gall.consensus:AnsAna_Cereopsis_novaehollandiae_B10K-D-IZW-75.COL1a1_Cyg-Gall.consensus:AnsAna_Branta_leucopsis_DBGNRM65.COL1a1_Cyg-Gall.consensus:AnsAna_Aythya_marila_GCA_029042245.1.COL1a1_Cyg-Gall.consensus:AnsAna_Tadorna…	DB Search
GFSGLQGPP(+15.99)GPPGAPGEQ(+0.98)GPSGASGPAGPR	94.84	2657.25	30	0.4	886.757	3	34.0659	21464	20201209_Lumos_Ritcher_sample148_17.raw	2110000	1	1	Proline Oxidation;Deamidation (NQ)	P9:Proline Oxidation:23.10;Q18:Deamidation (NQ):150.01	AnsAna_Anas_undulata_B10K-D-IZW-61.COL1a1_Cyg-Gall.consensus:AnsAna_Aythya_americana_D2006016050.COL1a1_Cyg-Gall.consensus:AnsAna_Pteronetta_hartlaubii_D2102046034.COL1a1_Cyg-Gall.consensus:AnsAna_Cereopsis_novaehollandiae_B10K-D-IZW-75.COL1a1_Cyg-Gall.consensus:AnsAna_Branta_leucopsis_DBGNRM65.COL1a1_Cyg-Gall.consensus:AnsAna_Aythya_marila_GCA_029042245.1.COL1a1_Cyg-Gall.consensus:AnsAna_Tadorna…	DB Search
GFSGLQGPP(+15.99)GPPGAPGEQGPSGASGPAGPR	94.32	2656.26	30	0	1329.14	2	33.3528	20970	20201209_Lumos_Ritcher_sample148_17.raw		0	0	Proline Oxidation	P9:Proline Oxidation:12.28	AnsAna_Anas_undulata_B10K-D-IZW-61.COL1a1_Cyg-Gall.consensus:AnsAna_Aythya_americana_D2006016050.COL1a1_Cyg-Gall.consensus:AnsAna_Pteronetta_hartlaubii_D2102046034.COL1a1_Cyg-Gall.consensus:AnsAna_Cereopsis_novaehollandiae_B10K-D-IZW-75.COL1a1_Cyg-Gall.consensus:AnsAna_Branta_leucopsis_DBGNRM65.COL1a1_Cyg-Gall.consensus:AnsAna_Aythya_marila_GCA_029042245.1.COL1a1_Cyg-Gall.consensus:AnsAna_Tadorna…	DB Search
GFSGLQGPP(+15.99)GPPGSP(+15.99)GEQ(+0.98)GPSGASGPAGPR	94.5	2689.24	30	-5.4	1345.62	2	32.2283	19763	20201209_Lumos_Ritcher_sample148_17.raw		0	0	Proline Oxidation;Proline Oxidation;Deamidation (NQ)	P9:Proline Oxidation:17.01;P15:Proline Oxidation:0.00;Q18:Deamidation (NQ):85.36	AnsAna_Aix_sponsa_GCA_032270905.1.COL1a1_Cyg-Gall.consensus	DB Search
GFSGLQGPP(+15.99)GPPGSP(+15.99)GEQGP(+15.99)SGASGPAGPR	92.12	2704.25	30	-1.3	902.422	3	29.8353	17796	20201209_Lumos_Ritcher_sample148_17.raw	2640000	2	2	Proline Oxidation;Proline Oxidation;Proline Oxidation	P9:Proline Oxidation:0.00;P15:Proline Oxidation:0.00;P20:Proline Oxidation:0.00	AnsAna_Aix_sponsa_GCA_032270905.1.COL1a1_Cyg-Gall.consensus	DB Search
GFSGLQGPP(+15.99)GPPGSP(+15.99)GEQGPSGA	85.37	2065.93	23	0.2	689.652	3	33.0486	20699	20201209_Lumos_Ritcher_sample148_17.raw	112000	1	1	Proline Oxidation;Proline Oxidation	P9:Proline Oxidation:0.00;P15:Proline Oxidation:25.58	AnsAna_Aix_sponsa_GCA_032270905.1.COL1a1_Cyg-Gall.consensus	DB Search
GFSGLQGPP(+15.99)GPPGSP(+15.99)GEQGPSGASGPAGPR	90.92	2688.25	30	1.2	897.093	3	31.0767	18377	20201209_Lumos_Ritcher_sample148_17.raw	151000000	1	1	Proline Oxidation;Proline Oxidation	P9:Proline Oxidation:20.00;P15:Proline Oxidation:0.00	AnsAna_Aix_sponsa_GCA_032270905.1.COL1a1_Cyg-Gall.consensus	DB Search
GFSGLQGPP(+15.99)GPPGSPGEQ(+0.98)GPSGASGPAGPR	94.71	2673.24	30	-0.5	1337.63	2	32.694	20179	20201209_Lumos_Ritcher_sample148_17.raw	4250000	1	1	Proline Oxidation;Deamidation (NQ)	P9:Proline Oxidation:9.34;Q18:Deamidation (NQ):96.63	AnsAna_Aix_sponsa_GCA_032270905.1.COL1a1_Cyg-Gall.consensus	DB Search
GFSGLQGPP(+15.99)GPPGSPGEQGPSGASGPAGPR	91.11	2672.26	30	-0.5	891.759	3	32.1935	19458	20201209_Lumos_Ritcher_sample148_17.raw	52700000	1	1	Proline Oxidation	P9:Proline Oxidation:8.14	AnsAna_Aix_sponsa_GCA_032270905.1.COL1a1_Cyg-Gall.consensus	DB Search
GFSGLQGPPGP(+15.99)P(+15.99)GSP(+15.99)GEQGPSGASGPAGPR	92.13	2704.25	30	-1.8	902.422	3	26.6856	14091	20201209_Lumos_Ritcher_sample148_17.raw	315000	1	1	Proline Oxidation;Proline Oxidation;Proline Oxidation	P11:Proline Oxidation:0.00;P12:Proline Oxidation:0.00;P15:Proline Oxidation:15.08	AnsAna_Aix_sponsa_GCA_032270905.1.COL1a1_Cyg-Gall.consensus	DB Search
GFSGLQGPPGP(+15.99)PGAP(+15.99)GEQGPSGASGPAGPR	81.85	2672.26	30	-7.8	1337.13	2	34.2393	21795	20201209_Lumos_Ritcher_sample148_17.raw		0	0	Proline Oxidation;Proline Oxidation	P11:Proline Oxidation:11.06;P15:Proline Oxidation:7.77	AnsAna_Anas_undulata_B10K-D-IZW-61.COL1a1_Cyg-Gall.consensus:AnsAna_Aythya_americana_D2006016050.COL1a1_Cyg-Gall.consensus:AnsAna_Pteronetta_hartlaubii_D2102046034.COL1a1_Cyg-Gall.consensus:AnsAna_Cereopsis_novaehollandiae_B10K-D-IZW-75.COL1a1_Cyg-Gall.consensus:AnsAna_Branta_leucopsis_DBGNRM65.COL1a1_Cyg-Gall.consensus:AnsAna_Aythya_marila_GCA_029042245.1.COL1a1_Cyg-Gall.consensus:AnsAna_Tadorna…	DB Search
GFSGLQGPPGP(+15.99)PGSP(+15.99)GEQ(+0.98)GPSGASGPAGPR	84.59	2689.24	30	0.5	897.42	3	29.9655	17370	20201209_Lumos_Ritcher_sample148_17.raw		0	0	Proline Oxidation;Proline Oxidation;Deamidation (NQ)	P11:Proline Oxidation:7.65;P15:Proline Oxidation:0.00;Q18:Deamidation (NQ):0.00	AnsAna_Aix_sponsa_GCA_032270905.1.COL1a1_Cyg-Gall.consensus	DB Search
GFSGLQGPPGPPGAP(+15.99)GEQ(+0.98)GPSGASGPAGPR	90.86	2657.25	30	-5.5	886.751	3	35.0848	22724	20201209_Lumos_Ritcher_sample148_17.raw		0	0	Proline Oxidation;Deamidation (NQ)	P15:Proline Oxidation:8.82;Q18:Deamidation (NQ):9.53	AnsAna_Anas_undulata_B10K-D-IZW-61.COL1a1_Cyg-Gall.consensus:AnsAna_Aythya_americana_D2006016050.COL1a1_Cyg-Gall.consensus:AnsAna_Pteronetta_hartlaubii_D2102046034.COL1a1_Cyg-Gall.consensus:AnsAna_Cereopsis_novaehollandiae_B10K-D-IZW-75.COL1a1_Cyg-Gall.consensus:AnsAna_Branta_leucopsis_DBGNRM65.COL1a1_Cyg-Gall.consensus:AnsAna_Aythya_marila_GCA_029042245.1.COL1a1_Cyg-Gall.consensus:AnsAna_Tadorna…	DB Search
GFSGLQGPPGPPGAPGEQGPSGASGPAGPR	80.53	2640.27	30	0	881.097	3	34.8042	22521	20201209_Lumos_Ritcher_sample148_17.raw	96500	1	1			AnsAna_Anas_undulata_B10K-D-IZW-61.COL1a1_Cyg-Gall.consensus:AnsAna_Aythya_americana_D2006016050.COL1a1_Cyg-Gall.consensus:AnsAna_Pteronetta_hartlaubii_D2102046034.COL1a1_Cyg-Gall.consensus:AnsAna_Cereopsis_novaehollandiae_B10K-D-IZW-75.COL1a1_Cyg-Gall.consensus:AnsAna_Branta_leucopsis_DBGNRM65.COL1a1_Cyg-Gall.consensus:AnsAna_Aythya_marila_GCA_029042245.1.COL1a1_Cyg-Gall.consensus:AnsAna_Tadorna…	DB Search
GFSGLQGPPGPPGSPGEQ(+0.98)GPSGASGPAGPR	93.93	2657.25	30	0.4	886.757	3	34.0659	21559	20201209_Lumos_Ritcher_sample148_17.raw	2110000	1	1	Deamidation (NQ)	Q18:Deamidation (NQ):80.99	AnsAna_Aix_sponsa_GCA_032270905.1.COL1a1_Cyg-Gall.consensus	DB Search
GFSGW(sub L)QGPP(+15.99)GPPGAP(+15.99)GEQGPSGASGPAGPR	43.38	2745.25	30	-4.8	916.087	3	37.6572	25368	20201209_Lumos_Ritcher_sample148_17.raw		0	0	Leu->Trp substitution;Proline Oxidation;Proline Oxidation	P9:Proline Oxidation:0.00;P15:Proline Oxidation:11.12	AnsAna_Alopochen_aegyptiaca_D1907004292.COL1a1_Cyg-Gall.consensus:AnsAna_Melanitta_americana_D2208137246.COL1a1_Cyg-Gall.consensus:AnsAna_Pteronetta_hartlaubii_D2102046034.COL1a1_Cyg-Gall.consensus:AnsAna_Polysticta_stelleri_D2301166173.COL1a1_Cyg-Gall.consensus:AnsAna_Chloephaga_rubidiceps_D2104051194.COL1a1_Cyg-Gall.consensus:AnsAna_Anser_erythropus_DBGNRM61.COL1a1_Cyg-Gall.consensus:AnsAna_Mel…	SPIDER
GGP(+15.99)GPAGPGGIP(+15.99)GER	86.03	1306.63	15	-8.4	654.315	2	24.357	11689	20201209_Lumos_Ritcher_sample148_17.raw		0	0	Proline Oxidation;Proline Oxidation	P3:Proline Oxidation:39.76;P12:Proline Oxidation:25.11	AnsAna_Spatula_platalea_D2007020414.COL1a2_Anas.consensus:AnsAna_Chloephaga_rubidiceps_D2104051194.COL1a2_Anas.consensus:AnsAna_Cygnus_atratus_GCA_013377495.2.COL1a2_Anas.consensus:AnsAna_Plectropterus_gambensis_B10K-D-WWT-22.COL1a2_Anas.consensus:AnsAna_Aythya_affinis_CL200153793_L02.COL1a2_Anas.consensus:AnsAna_Somateria_spectabilis_D2006016067.COL1a2_Anas.consensus:AnsAna_Dendrocygna_guttata_B…	DB Search
GHN(+0.98)GLQGLP(+15.99)GLAGQHGDQ(+0.98)GPPGNNGPAGPR	101.76	2844.33	30	-9.1	712.083	4	31.2126	18675	20201209_Lumos_Ritcher_sample148_17.raw		0	0	Deamidation (NQ);Proline Oxidation;Deamidation (NQ)	N3:Deamidation (NQ):0.00;P9:Proline Oxidation:1000.00;Q18:Deamidation (NQ):8.26	AnsAna_Spatula_platalea_D2007020414.COL1a2_Anas.consensus:AnsAna_Chloephaga_rubidiceps_D2104051194.COL1a2_Anas.consensus:AnsAna_Cygnus_atratus_GCA_013377495.2.COL1a2_Anas.consensus:AnsAna_Plectropterus_gambensis_B10K-D-WWT-22.COL1a2_Anas.consensus:AnsAna_Aythya_affinis_CL200153793_L02.COL1a2_Anas.consensus:AnsAna_Somateria_spectabilis_D2006016067.COL1a2_Anas.consensus:AnsAna_Dendrocygna_guttata_B…	DB Search
GHN(+0.98)GLQGLP(+15.99)GLAGQHGDQGPP(+15.99)GN(+0.98)NGPAGPR	42.74	2860.32	30	-0.3	716.088	4	30.4888	17856	20201209_Lumos_Ritcher_sample148_17.raw	3200000	1	1	Deamidation (NQ);Proline Oxidation;Proline Oxidation;Deamidation (NQ)	N3:Deamidation (NQ):14.84;P9:Proline Oxidation:1000.00;P21:Proline Oxidation:1000.00;N23:Deamidation (NQ):0.00	AnsAna_Alopochen_aegyptiaca_D1907004292.COL1a2_Anas.consensus:AnsAna_Oxyura_jamaicensis_GCA_011077185.1.COL1a2_Anas.consensus:AnsAna_Lophonetta_specularioides_GCA_032165235.1.COL1a2_Anas.consensus:AnsAna_Anser_brachyrhynchus_GCA_002592135.1.COL1a2_Anas.consensus:AnsAna_Mareca_falcata_D2006016302.COL1a2_Anas.consensus:AnsAna_Cygnus_olor_GCA_009769485.2.COL1a2_Anas.consensus:AnsAna_Anser_indicus_GC…	SPIDER
GHN(+0.98)GLQGLP(+15.99)GLAGQHGDQGPP(+15.99)GNN(+0.98)GPAGPR	41.85	2860.32	30	-0.3	716.088	4	30.4888	17815	20201209_Lumos_Ritcher_sample148_17.raw	3200000	1	1	Deamidation (NQ);Proline Oxidation;Proline Oxidation;Deamidation (NQ)	N3:Deamidation (NQ):14.84;P9:Proline Oxidation:1000.00;P21:Proline Oxidation:1000.00;N24:Deamidation (NQ):14.02	AnsAna_Alopochen_aegyptiaca_D1907004292.COL1a2_Anas.consensus:AnsAna_Oxyura_jamaicensis_GCA_011077185.1.COL1a2_Anas.consensus:AnsAna_Lophonetta_specularioides_GCA_032165235.1.COL1a2_Anas.consensus:AnsAna_Anser_brachyrhynchus_GCA_002592135.1.COL1a2_Anas.consensus:AnsAna_Mareca_falcata_D2006016302.COL1a2_Anas.consensus:AnsAna_Cygnus_olor_GCA_009769485.2.COL1a2_Anas.consensus:AnsAna_Anser_indicus_GC…	SPIDER
GHN(+0.98)GLQGLP(+15.99)GLAGQHGDQGPP(+15.99)GNNGPAGPR	95.58	2859.34	30	-0.7	715.842	4	29.8893	17292	20201209_Lumos_Ritcher_sample148_17.raw		0	0	Deamidation (NQ);Proline Oxidation;Proline Oxidation	N3:Deamidation (NQ):18.00;P9:Proline Oxidation:30.57;P21:Proline Oxidation:10.11	AnsAna_Spatula_platalea_D2007020414.COL1a2_Anas.consensus:AnsAna_Chloephaga_rubidiceps_D2104051194.COL1a2_Anas.consensus:AnsAna_Cygnus_atratus_GCA_013377495.2.COL1a2_Anas.consensus:AnsAna_Plectropterus_gambensis_B10K-D-WWT-22.COL1a2_Anas.consensus:AnsAna_Aythya_affinis_CL200153793_L02.COL1a2_Anas.consensus:AnsAna_Somateria_spectabilis_D2006016067.COL1a2_Anas.consensus:AnsAna_Dendrocygna_guttata_B…	DB Search
GHN(+0.98)GLQGLPGLAGQHGDQGP(+15.99)P(+15.99)GNNGPAGPR	105.22	2859.34	30	0.8	715.843	4	29.1354	16490	20201209_Lumos_Ritcher_sample148_17.raw		0	0	Deamidation (NQ);Proline Oxidation;Proline Oxidation	N3:Deamidation (NQ):0.00;P20:Proline Oxidation:0.00;P21:Proline Oxidation:0.00	AnsAna_Spatula_platalea_D2007020414.COL1a2_Anas.consensus:AnsAna_Chloephaga_rubidiceps_D2104051194.COL1a2_Anas.consensus:AnsAna_Cygnus_atratus_GCA_013377495.2.COL1a2_Anas.consensus:AnsAna_Plectropterus_gambensis_B10K-D-WWT-22.COL1a2_Anas.consensus:AnsAna_Aythya_affinis_CL200153793_L02.COL1a2_Anas.consensus:AnsAna_Somateria_spectabilis_D2006016067.COL1a2_Anas.consensus:AnsAna_Dendrocygna_guttata_B…	DB Search
GHNGLQ(+0.98)GLP(+15.99)GLAGQ(+0.98)HGDQGPPGNNGPAGPR	101.73	2844.33	30	-7.3	712.084	4	30.8492	18293	20201209_Lumos_Ritcher_sample148_17.raw	121000	1	1	Deamidation (NQ);Proline Oxidation;Deamidation (NQ)	Q6:Deamidation (NQ):0.00;P9:Proline Oxidation:1000.00;Q14:Deamidation (NQ):0.00	AnsAna_Lophodytes_cucullatus_B10K-D-WWT-15.COL1a2_Anas.consensus:AnsAna_Spatula_platalea_D2007020414.COL1a2_Anas.consensus:AnsAna_Anas_gibberifrons_D2007020344.COL1a2_Anas.consensus:AnsAna_Aythya_baeri_GCA_026413565.1.COL1a2_Anas.consensus:AnsAna_Cyanochen_cyanoptera_B10K-D-WWT-10.COL1a2_Anas.consensus:AnsAna_Chloephaga_rubidiceps_D2104051194.COL1a2_Anas.consensus:AnsAna_Cygnus_atratus_GCA_013377…	DB Search
GHNGLQ(+0.98)GLP(+15.99)GLAGQHGDQGPPGN(+0.98)NGPAGPR	106.34	2844.33	30	-7.3	712.084	4	30.8492	18374	20201209_Lumos_Ritcher_sample148_17.raw	121000	1	1	Deamidation (NQ);Proline Oxidation;Deamidation (NQ)	Q6:Deamidation (NQ):0.00;P9:Proline Oxidation:1000.00;N23:Deamidation (NQ):10.11	AnsAna_Spatula_platalea_D2007020414.COL1a2_Anas.consensus:AnsAna_Chloephaga_rubidiceps_D2104051194.COL1a2_Anas.consensus:AnsAna_Cygnus_atratus_GCA_013377495.2.COL1a2_Anas.consensus:AnsAna_Plectropterus_gambensis_B10K-D-WWT-22.COL1a2_Anas.consensus:AnsAna_Aythya_affinis_CL200153793_L02.COL1a2_Anas.consensus:AnsAna_Somateria_spectabilis_D2006016067.COL1a2_Anas.consensus:AnsAna_Dendrocygna_guttata_B…	DB Search
GHNGLQ(+0.98)GLP(+15.99)GLAGQHGDQGPPGNN(+0.98)GPAGPR	105.18	2844.33	30	-7.3	712.084	4	30.8492	18372	20201209_Lumos_Ritcher_sample148_17.raw	121000	1	1	Deamidation (NQ);Proline Oxidation;Deamidation (NQ)	Q6:Deamidation (NQ):0.00;P9:Proline Oxidation:1000.00;N24:Deamidation (NQ):0.00	AnsAna_Spatula_platalea_D2007020414.COL1a2_Anas.consensus:AnsAna_Chloephaga_rubidiceps_D2104051194.COL1a2_Anas.consensus:AnsAna_Cygnus_atratus_GCA_013377495.2.COL1a2_Anas.consensus:AnsAna_Plectropterus_gambensis_B10K-D-WWT-22.COL1a2_Anas.consensus:AnsAna_Aythya_affinis_CL200153793_L02.COL1a2_Anas.consensus:AnsAna_Somateria_spectabilis_D2006016067.COL1a2_Anas.consensus:AnsAna_Dendrocygna_guttata_B…	DB Search
GHNGLQGLP(+15.99)GLAGQHGDQGPP(+15.99)GN(+0.98)NGPAGPR	42.45	2859.34	30	8.4	954.128	3	30.1252	17537	20201209_Lumos_Ritcher_sample148_17.raw		0	0	Proline Oxidation;Proline Oxidation;Deamidation (NQ)	P9:Proline Oxidation:11.49;P21:Proline Oxidation:26.02;N23:Deamidation (NQ):0.00	AnsAna_Spatula_platalea_D2007020414.COL1a2_Anas.consensus:AnsAna_Chloephaga_rubidiceps_D2104051194.COL1a2_Anas.consensus:AnsAna_Cygnus_atratus_GCA_013377495.2.COL1a2_Anas.consensus:AnsAna_Plectropterus_gambensis_B10K-D-WWT-22.COL1a2_Anas.consensus:AnsAna_Aythya_affinis_CL200153793_L02.COL1a2_Anas.consensus:AnsAna_Somateria_spectabilis_D2006016067.COL1a2_Anas.consensus:AnsAna_Dendrocygna_guttata_B…	DB Search
GHRGFD(sub S)GLQ(+0.98)GPPGPPGAP(+15.99)GEQGPSGASGPAGPR	42.56	3035.42	33	-8.1	1012.81	3	29.8494	17248	20201209_Lumos_Ritcher_sample148_17.raw		0	0	Ser->Asp substitution;Deamidation (NQ);Proline Oxidation	Q9:Deamidation (NQ):35.89;P18:Proline Oxidation:12.33	AnsAna_Spatula_discors_GCA_032165275.1.COL1a1_Cyg-Gall.consensus:AnsAna_Mareca_sibilatrix_GCA_034783215.1.COL1a1_Cyg-Gall.consensus:AnsAna_Pteronetta_hartlaubii_D2102046034.COL1a1_Cyg-Gall.consensus:AnsAna_Tachyeres_brachypterus_GCA_032357605.1.COL1a1_Cyg-Gall.consensus:AnsAna_Branta_leucopsis_DBGNRM65.COL1a1_Cyg-Gall.consensus:AnsAna_Aythya_marila_GCA_029042245.1.COL1a1_Cyg-Gall.consensus:AnsAna…	SPIDER
GIAGAP(+15.99)GFP(+15.99)GAR	70.63	1101.56	12	1.7	551.787	2	26.0813	13415	20201209_Lumos_Ritcher_sample148_17.raw		0	0	Proline Oxidation;Proline Oxidation	P6:Proline Oxidation:1000.00;P9:Proline Oxidation:1000.00	AnsAna_Anas_undulata_B10K-D-IZW-61.COL1a1_Cyg-Gall.consensus:AnsAna_Aythya_americana_D2006016050.COL1a1_Cyg-Gall.consensus:AnsAna_Cereopsis_novaehollandiae_B10K-D-IZW-75.COL1a1_Cyg-Gall.consensus:AnsAna_Branta_leucopsis_DBGNRM65.COL1a1_Cyg-Gall.consensus:AnsAna_Aythya_marila_GCA_029042245.1.COL1a1_Cyg-Gall.consensus:AnsAna_Tadorna_tadorna_DBGNRM58.COL1a1_Cyg-Gall.consensus:AnsAna_Anser_cygnoides_…	DB Search
GILGAP(+15.99)GILGLP(+15.99)GSR	90.53	1408.8	15	0.1	705.409	2	45.409	33618	20201209_Lumos_Ritcher_sample148_17.raw	3220000	1	1	Proline Oxidation;Proline Oxidation	P6:Proline Oxidation:1000.00;P12:Proline Oxidation:1000.00	AnsAna_Spatula_platalea_D2007020414.COL1a2_Anas.consensus:AnsAna_Chloephaga_rubidiceps_D2104051194.COL1a2_Anas.consensus:AnsAna_Cygnus_atratus_GCA_013377495.2.COL1a2_Anas.consensus:AnsAna_Plectropterus_gambensis_B10K-D-WWT-22.COL1a2_Anas.consensus:AnsAna_Aythya_affinis_CL200153793_L02.COL1a2_Anas.consensus:AnsAna_Somateria_spectabilis_D2006016067.COL1a2_Anas.consensus:AnsAna_Dendrocygna_guttata_B…	DB Search
GILGLP(+15.99)GSR	91.45	884.508	9	-0.8	443.261	2	33.6625	21165	20201209_Lumos_Ritcher_sample148_17.raw	1020000	1	1	Proline Oxidation	P6:Proline Oxidation:1000.00	AnsAna_Spatula_platalea_D2007020414.COL1a2_Anas.consensus:AnsAna_Chloephaga_rubidiceps_D2104051194.COL1a2_Anas.consensus:AnsAna_Cygnus_atratus_GCA_013377495.2.COL1a2_Anas.consensus:AnsAna_Plectropterus_gambensis_B10K-D-WWT-22.COL1a2_Anas.consensus:AnsAna_Aythya_affinis_CL200153793_L02.COL1a2_Anas.consensus:AnsAna_Somateria_spectabilis_D2006016067.COL1a2_Anas.consensus:AnsAna_Dendrocygna_guttata_B…	DB Search
GIP(+15.99)GPP(+15.99)GPAGPSGAR	71.6	1318.66	15	-0.3	660.338	2	21.2895	8291	20201209_Lumos_Ritcher_sample148_17.raw	2940000	1	1	Proline Oxidation;Proline Oxidation	P3:Proline Oxidation:18.23;P6:Proline Oxidation:33.98	AnsAna_Spatula_platalea_D2007020414.COL1a2_Anas.consensus:AnsAna_Chloephaga_rubidiceps_D2104051194.COL1a2_Anas.consensus:AnsAna_Cygnus_atratus_GCA_013377495.2.COL1a2_Anas.consensus:AnsAna_Plectropterus_gambensis_B10K-D-WWT-22.COL1a2_Anas.consensus:AnsAna_Aythya_affinis_CL200153793_L02.COL1a2_Anas.consensus:AnsAna_Somateria_spectabilis_D2006016067.COL1a2_Anas.consensus:AnsAna_Dendrocygna_guttata_B…	DB Search
GISGATGEP(+15.99)GPLGVSGPP(+15.99)GAR	93.6	1864.93	21	-2.2	933.469	2	30.1844	17604	20201209_Lumos_Ritcher_sample148_17.raw	512000	2	2	Proline Oxidation;Proline Oxidation	P9:Proline Oxidation:22.85;P18:Proline Oxidation:0.00	AnsAna_Spatula_platalea_D2007020414.COL1a2_Anas.consensus:AnsAna_Chloephaga_rubidiceps_D2104051194.COL1a2_Anas.consensus:AnsAna_Cygnus_atratus_GCA_013377495.2.COL1a2_Anas.consensus:AnsAna_Plectropterus_gambensis_B10K-D-WWT-22.COL1a2_Anas.consensus:AnsAna_Aythya_affinis_CL200153793_L02.COL1a2_Anas.consensus:AnsAna_Somateria_spectabilis_D2006016067.COL1a2_Anas.consensus:AnsAna_Dendrocygna_guttata_B…	DB Search
GLAGPQ(+0.98)GPR	51.83	852.445	9	-0.3	427.23	2	18.9263	6051	20201209_Lumos_Ritcher_sample148_17.raw	92500	1	1	Deamidation (NQ)	Q6:Deamidation (NQ):1000.00	AnsAna_Spatula_platalea_D2007020414.COL1a2_Anas.consensus:AnsAna_Chloephaga_rubidiceps_D2104051194.COL1a2_Anas.consensus:AnsAna_Cygnus_atratus_GCA_013377495.2.COL1a2_Anas.consensus:AnsAna_Plectropterus_gambensis_B10K-D-WWT-22.COL1a2_Anas.consensus:AnsAna_Aythya_affinis_CL200153793_L02.COL1a2_Anas.consensus:AnsAna_Somateria_spectabilis_D2006016067.COL1a2_Anas.consensus:AnsAna_Dendrocygna_guttata_B…	DB Search
GLAGPQGPR	88.38	851.461	9	-0.2	426.738	2	18.1752	5319	20201209_Lumos_Ritcher_sample148_17.raw	369000	1	1			AnsAna_Spatula_platalea_D2007020414.COL1a2_Anas.consensus:AnsAna_Chloephaga_rubidiceps_D2104051194.COL1a2_Anas.consensus:AnsAna_Cygnus_atratus_GCA_013377495.2.COL1a2_Anas.consensus:AnsAna_Plectropterus_gambensis_B10K-D-WWT-22.COL1a2_Anas.consensus:AnsAna_Aythya_affinis_CL200153793_L02.COL1a2_Anas.consensus:AnsAna_Somateria_spectabilis_D2006016067.COL1a2_Anas.consensus:AnsAna_Dendrocygna_guttata_B…	DB Search
GLD(sub H)GEFGVP(+15.99)GPAGPR	41.14	1440.7	15	-1.4	721.356	2	33.6856	21276	20201209_Lumos_Ritcher_sample148_17.raw	15200000	2	2	His->Asp substitution;Proline Oxidation	P9:Proline Oxidation:18.53	AnsAna_Alopochen_aegyptiaca_D1907004292.COL1a2_Anas.consensus:AnsAna_Oxyura_jamaicensis_GCA_011077185.1.COL1a2_Anas.consensus:AnsAna_Lophonetta_specularioides_GCA_032165235.1.COL1a2_Anas.consensus:AnsAna_Anser_brachyrhynchus_GCA_002592135.1.COL1a2_Anas.consensus:AnsAna_Mareca_falcata_D2006016302.COL1a2_Anas.consensus:AnsAna_Cygnus_olor_GCA_009769485.2.COL1a2_Anas.consensus:AnsAna_Anser_indicus_GC…	SPIDER
GLHGEFGVP(+15.99)GP(+15.99)AGPR	93.62	1478.73	15	-0.6	740.37	2	25.7042	12866	20201209_Lumos_Ritcher_sample148_17.raw	21000000	2	2	Proline Oxidation;Proline Oxidation	P9:Proline Oxidation:13.97;P11:Proline Oxidation:0.00	AnsAna_Spatula_platalea_D2007020414.COL1a2_Anas.consensus:AnsAna_Chloephaga_rubidiceps_D2104051194.COL1a2_Anas.consensus:AnsAna_Cygnus_atratus_GCA_013377495.2.COL1a2_Anas.consensus:AnsAna_Plectropterus_gambensis_B10K-D-WWT-22.COL1a2_Anas.consensus:AnsAna_Aythya_affinis_CL200153793_L02.COL1a2_Anas.consensus:AnsAna_Somateria_spectabilis_D2006016067.COL1a2_Anas.consensus:AnsAna_Dendrocygna_guttata_B…	DB Search
GLHGEFGVP(+15.99)GPAGP(+15.99)R	73.76	1478.73	15	-0.6	740.37	2	25.7042	13119	20201209_Lumos_Ritcher_sample148_17.raw	1860000	1	1	Proline Oxidation;Proline Oxidation	P9:Proline Oxidation:5.03;P14:Proline Oxidation:0.00	AnsAna_Spatula_platalea_D2007020414.COL1a2_Anas.consensus:AnsAna_Chloephaga_rubidiceps_D2104051194.COL1a2_Anas.consensus:AnsAna_Cygnus_atratus_GCA_013377495.2.COL1a2_Anas.consensus:AnsAna_Plectropterus_gambensis_B10K-D-WWT-22.COL1a2_Anas.consensus:AnsAna_Aythya_affinis_CL200153793_L02.COL1a2_Anas.consensus:AnsAna_Somateria_spectabilis_D2006016067.COL1a2_Anas.consensus:AnsAna_Dendrocygna_guttata_B…	DB Search
GLHGEFGVP(+15.99)GPAGPR	95.5	1462.73	15	0.4	732.373	2	28.081	15551	20201209_Lumos_Ritcher_sample148_17.raw	78000000	1	1	Proline Oxidation	P9:Proline Oxidation:25.86	AnsAna_Spatula_platalea_D2007020414.COL1a2_Anas.consensus:AnsAna_Chloephaga_rubidiceps_D2104051194.COL1a2_Anas.consensus:AnsAna_Cygnus_atratus_GCA_013377495.2.COL1a2_Anas.consensus:AnsAna_Plectropterus_gambensis_B10K-D-WWT-22.COL1a2_Anas.consensus:AnsAna_Aythya_affinis_CL200153793_L02.COL1a2_Anas.consensus:AnsAna_Somateria_spectabilis_D2006016067.COL1a2_Anas.consensus:AnsAna_Dendrocygna_guttata_B…	DB Search
GLHGEFGVPGP(+15.99)AGPR	94.94	1462.73	15	3.1	732.375	2	28.0119	15476	20201209_Lumos_Ritcher_sample148_17.raw		0	0	Proline Oxidation	P11:Proline Oxidation:0.00	AnsAna_Spatula_platalea_D2007020414.COL1a2_Anas.consensus:AnsAna_Chloephaga_rubidiceps_D2104051194.COL1a2_Anas.consensus:AnsAna_Cygnus_atratus_GCA_013377495.2.COL1a2_Anas.consensus:AnsAna_Plectropterus_gambensis_B10K-D-WWT-22.COL1a2_Anas.consensus:AnsAna_Aythya_affinis_CL200153793_L02.COL1a2_Anas.consensus:AnsAna_Somateria_spectabilis_D2006016067.COL1a2_Anas.consensus:AnsAna_Dendrocygna_guttata_B…	DB Search
GLNGLP(+15.99)GPIGP(+15.99)P(+15.99)GPR	57.69	1445.76	15	0.5	723.889	2	31.6062	18778	20201209_Lumos_Ritcher_sample148_17.raw	3390000	1	1	Proline Oxidation;Proline Oxidation;Proline Oxidation	P6:Proline Oxidation:18.53;P11:Proline Oxidation:5.77;P12:Proline Oxidation:7.32	AnsAna_Anas_undulata_B10K-D-IZW-61.COL1a1_Cyg-Gall.consensus:AnsAna_Aythya_americana_D2006016050.COL1a1_Cyg-Gall.consensus:AnsAna_Pteronetta_hartlaubii_D2102046034.COL1a1_Cyg-Gall.consensus:AnsAna_Cereopsis_novaehollandiae_B10K-D-IZW-75.COL1a1_Cyg-Gall.consensus:AnsAna_Branta_leucopsis_DBGNRM65.COL1a1_Cyg-Gall.consensus:AnsAna_Aythya_marila_GCA_029042245.1.COL1a1_Cyg-Gall.consensus:AnsAna_Tadorna…	DB Search
GLP(+15.99)GADGR	52.37	757.372	8	-0.1	379.693	2	13.9482	3234	20201209_Lumos_Ritcher_sample148_17.raw	431000	1	1	Proline Oxidation	P3:Proline Oxidation:1000.00	AnsAna_Spatula_platalea_D2007020414.COL1a2_Anas.consensus:AnsAna_Chloephaga_rubidiceps_D2104051194.COL1a2_Anas.consensus:AnsAna_Cygnus_atratus_GCA_013377495.2.COL1a2_Anas.consensus:AnsAna_Plectropterus_gambensis_B10K-D-WWT-22.COL1a2_Anas.consensus:AnsAna_Aythya_affinis_CL200153793_L02.COL1a2_Anas.consensus:AnsAna_Somateria_spectabilis_D2006016067.COL1a2_Anas.consensus:AnsAna_Dendrocygna_guttata_B…	DB Search
GLP(+15.99)GAIGAP(+15.99)GP(+15.99)AGGAGDRGEGGPAGPAGPAGAR	54.92	2740.33	33	-0.4	914.449	3	26.4528	13756	20201209_Lumos_Ritcher_sample148_17.raw	136000	1	1	Proline Oxidation;Proline Oxidation;Proline Oxidation	P3:Proline Oxidation:52.33;P9:Proline Oxidation:8.30;P11:Proline Oxidation:0.00	AnsAna_Spatula_platalea_D2007020414.COL1a2_Anas.consensus:AnsAna_Chloephaga_rubidiceps_D2104051194.COL1a2_Anas.consensus:AnsAna_Cygnus_atratus_GCA_013377495.2.COL1a2_Anas.consensus:AnsAna_Aythya_affinis_CL200153793_L02.COL1a2_Anas.consensus:AnsAna_Somateria_spectabilis_D2006016067.COL1a2_Anas.consensus:AnsAna_Dendrocygna_guttata_B10K-D-IZW-85.COL1a2_Anas.consensus:AnsAna_Dendrocygna_arborea_B10K-…	DB Search
GLP(+15.99)GAIGAP(+15.99)GPAGGA	45.99	1193.6	15	0.3	597.809	2	29.0824	16467	20201209_Lumos_Ritcher_sample148_17.raw	553000	1	1	Proline Oxidation;Proline Oxidation	P3:Proline Oxidation:75.39;P9:Proline Oxidation:20.41	AnsAna_Spatula_platalea_D2007020414.COL1a2_Anas.consensus:AnsAna_Chloephaga_rubidiceps_D2104051194.COL1a2_Anas.consensus:AnsAna_Cygnus_atratus_GCA_013377495.2.COL1a2_Anas.consensus:AnsAna_Plectropterus_gambensis_B10K-D-WWT-22.COL1a2_Anas.consensus:AnsAna_Aythya_affinis_CL200153793_L02.COL1a2_Anas.consensus:AnsAna_Somateria_spectabilis_D2006016067.COL1a2_Anas.consensus:AnsAna_Dendrocygna_guttata_B…	DB Search
GLP(+15.99)GAIGAP(+15.99)GPAGGAGDR	90.76	1521.75	18	0	508.258	3	25.0413	12214	20201209_Lumos_Ritcher_sample148_17.raw	488000000	2	2	Proline Oxidation;Proline Oxidation	P3:Proline Oxidation:93.19;P9:Proline Oxidation:45.01	AnsAna_Spatula_platalea_D2007020414.COL1a2_Anas.consensus:AnsAna_Chloephaga_rubidiceps_D2104051194.COL1a2_Anas.consensus:AnsAna_Cygnus_atratus_GCA_013377495.2.COL1a2_Anas.consensus:AnsAna_Plectropterus_gambensis_B10K-D-WWT-22.COL1a2_Anas.consensus:AnsAna_Aythya_affinis_CL200153793_L02.COL1a2_Anas.consensus:AnsAna_Somateria_spectabilis_D2006016067.COL1a2_Anas.consensus:AnsAna_Dendrocygna_guttata_B…	DB Search
GLP(+15.99)GAIGAP(+15.99)GPAGGAGDRGEG	65.01	1764.84	21	-0.2	883.427	2	25.4994	12780	20201209_Lumos_Ritcher_sample148_17.raw		0	0	Proline Oxidation;Proline Oxidation	P3:Proline Oxidation:109.84;P9:Proline Oxidation:22.85	AnsAna_Spatula_platalea_D2007020414.COL1a2_Anas.consensus:AnsAna_Chloephaga_rubidiceps_D2104051194.COL1a2_Anas.consensus:AnsAna_Cygnus_atratus_GCA_013377495.2.COL1a2_Anas.consensus:AnsAna_Aythya_affinis_CL200153793_L02.COL1a2_Anas.consensus:AnsAna_Somateria_spectabilis_D2006016067.COL1a2_Anas.consensus:AnsAna_Dendrocygna_guttata_B10K-D-IZW-85.COL1a2_Anas.consensus:AnsAna_Dendrocygna_arborea_B10K-…	DB Search
GLP(+15.99)GAIGAP(+15.99)GPAGGAGDRGEGGP(+15.99)AGPAGPAGAR	61.49	2740.33	33	-0.8	686.089	4	25.7979	13059	20201209_Lumos_Ritcher_sample148_17.raw	9760000	2	2	Proline Oxidation;Proline Oxidation;Proline Oxidation	P3:Proline Oxidation:36.81;P9:Proline Oxidation:5.47;P23:Proline Oxidation:28.73	AnsAna_Spatula_platalea_D2007020414.COL1a2_Anas.consensus:AnsAna_Chloephaga_rubidiceps_D2104051194.COL1a2_Anas.consensus:AnsAna_Cygnus_atratus_GCA_013377495.2.COL1a2_Anas.consensus:AnsAna_Aythya_affinis_CL200153793_L02.COL1a2_Anas.consensus:AnsAna_Somateria_spectabilis_D2006016067.COL1a2_Anas.consensus:AnsAna_Dendrocygna_guttata_B10K-D-IZW-85.COL1a2_Anas.consensus:AnsAna_Dendrocygna_arborea_B10K-…	DB Search
GLP(+15.99)GAIGAP(+15.99)GPAGGAGDRGEGGPA	85.5	1989.95	24	1	664.325	3	27.1809	14583	20201209_Lumos_Ritcher_sample148_17.raw		0	0	Proline Oxidation;Proline Oxidation	P3:Proline Oxidation:19.61;P9:Proline Oxidation:9.40	AnsAna_Spatula_platalea_D2007020414.COL1a2_Anas.consensus:AnsAna_Chloephaga_rubidiceps_D2104051194.COL1a2_Anas.consensus:AnsAna_Cygnus_atratus_GCA_013377495.2.COL1a2_Anas.consensus:AnsAna_Aythya_affinis_CL200153793_L02.COL1a2_Anas.consensus:AnsAna_Somateria_spectabilis_D2006016067.COL1a2_Anas.consensus:AnsAna_Dendrocygna_guttata_B10K-D-IZW-85.COL1a2_Anas.consensus:AnsAna_Dendrocygna_arborea_B10K-…	DB Search
GLP(+15.99)GAIGAP(+15.99)GPAGGAGDRGEGGPAGP(+15.99)AGPAGAR	87.85	2740.33	33	-0.4	914.449	3	25.7979	12999	20201209_Lumos_Ritcher_sample148_17.raw	9160000	1	1	Proline Oxidation;Proline Oxidation;Proline Oxidation	P3:Proline Oxidation:150.63;P9:Proline Oxidation:22.85;P26:Proline Oxidation:4.52	AnsAna_Spatula_platalea_D2007020414.COL1a2_Anas.consensus:AnsAna_Chloephaga_rubidiceps_D2104051194.COL1a2_Anas.consensus:AnsAna_Cygnus_atratus_GCA_013377495.2.COL1a2_Anas.consensus:AnsAna_Aythya_affinis_CL200153793_L02.COL1a2_Anas.consensus:AnsAna_Somateria_spectabilis_D2006016067.COL1a2_Anas.consensus:AnsAna_Dendrocygna_guttata_B10K-D-IZW-85.COL1a2_Anas.consensus:AnsAna_Dendrocygna_arborea_B10K-…	DB Search
GLP(+15.99)GAIGAP(+15.99)GPAGGAGDRGEGGPAGPA	92.01	2215.06	27	1.4	1108.54	2	28.6215	16035	20201209_Lumos_Ritcher_sample148_17.raw		0	0	Proline Oxidation;Proline Oxidation	P3:Proline Oxidation:99.62;P9:Proline Oxidation:32.28	AnsAna_Spatula_platalea_D2007020414.COL1a2_Anas.consensus:AnsAna_Chloephaga_rubidiceps_D2104051194.COL1a2_Anas.consensus:AnsAna_Cygnus_atratus_GCA_013377495.2.COL1a2_Anas.consensus:AnsAna_Aythya_affinis_CL200153793_L02.COL1a2_Anas.consensus:AnsAna_Somateria_spectabilis_D2006016067.COL1a2_Anas.consensus:AnsAna_Dendrocygna_guttata_B10K-D-IZW-85.COL1a2_Anas.consensus:AnsAna_Dendrocygna_arborea_B10K-…	DB Search
GLP(+15.99)GAIGAP(+15.99)GPAGGAGDRGEGGPAGPAGPAGAR	93.32	2724.33	33	-0.9	909.117	3	26.8418	14222	20201209_Lumos_Ritcher_sample148_17.raw	186000000	1	1	Proline Oxidation;Proline Oxidation	P3:Proline Oxidation:150.89;P9:Proline Oxidation:26.31	AnsAna_Spatula_platalea_D2007020414.COL1a2_Anas.consensus:AnsAna_Chloephaga_rubidiceps_D2104051194.COL1a2_Anas.consensus:AnsAna_Cygnus_atratus_GCA_013377495.2.COL1a2_Anas.consensus:AnsAna_Aythya_affinis_CL200153793_L02.COL1a2_Anas.consensus:AnsAna_Somateria_spectabilis_D2006016067.COL1a2_Anas.consensus:AnsAna_Dendrocygna_guttata_B10K-D-IZW-85.COL1a2_Anas.consensus:AnsAna_Dendrocygna_arborea_B10K-…	DB Search
GLP(+15.99)GAIGAPGP(+15.99)AGGAGDRGEGGPAGPAGPA	75.2	2440.17	30	-1.2	814.397	3	29.9026	17271	20201209_Lumos_Ritcher_sample148_17.raw	162000	1	1	Proline Oxidation;Proline Oxidation	P3:Proline Oxidation:53.33;P11:Proline Oxidation:6.68	AnsAna_Spatula_platalea_D2007020414.COL1a2_Anas.consensus:AnsAna_Chloephaga_rubidiceps_D2104051194.COL1a2_Anas.consensus:AnsAna_Cygnus_atratus_GCA_013377495.2.COL1a2_Anas.consensus:AnsAna_Aythya_affinis_CL200153793_L02.COL1a2_Anas.consensus:AnsAna_Somateria_spectabilis_D2006016067.COL1a2_Anas.consensus:AnsAna_Dendrocygna_guttata_B10K-D-IZW-85.COL1a2_Anas.consensus:AnsAna_Dendrocygna_arborea_B10K-…	DB Search
GLP(+15.99)GISGATGEP(+15.99)GPL	93.4	1353.68	15	0.1	677.846	2	41.2	29205	20201209_Lumos_Ritcher_sample148_17.raw	6210000	1	1	Proline Oxidation;Proline Oxidation	P3:Proline Oxidation:150.46;P12:Proline Oxidation:30.36	AnsAna_Spatula_platalea_D2007020414.COL1a2_Anas.consensus:AnsAna_Chloephaga_rubidiceps_D2104051194.COL1a2_Anas.consensus:AnsAna_Cygnus_atratus_GCA_013377495.2.COL1a2_Anas.consensus:AnsAna_Plectropterus_gambensis_B10K-D-WWT-22.COL1a2_Anas.consensus:AnsAna_Aythya_affinis_CL200153793_L02.COL1a2_Anas.consensus:AnsAna_Somateria_spectabilis_D2006016067.COL1a2_Anas.consensus:AnsAna_Dendrocygna_guttata_B…	DB Search
GLP(+15.99)GISGATGEP(+15.99)GPLGV	92.55	1509.77	17	0.2	755.891	2	45.1928	33428	20201209_Lumos_Ritcher_sample148_17.raw		0	0	Proline Oxidation;Proline Oxidation	P3:Proline Oxidation:149.91;P12:Proline Oxidation:26.31	AnsAna_Spatula_platalea_D2007020414.COL1a2_Anas.consensus:AnsAna_Chloephaga_rubidiceps_D2104051194.COL1a2_Anas.consensus:AnsAna_Cygnus_atratus_GCA_013377495.2.COL1a2_Anas.consensus:AnsAna_Plectropterus_gambensis_B10K-D-WWT-22.COL1a2_Anas.consensus:AnsAna_Aythya_affinis_CL200153793_L02.COL1a2_Anas.consensus:AnsAna_Somateria_spectabilis_D2006016067.COL1a2_Anas.consensus:AnsAna_Dendrocygna_guttata_B…	DB Search
GLP(+15.99)GISGATGEP(+15.99)GPLGVS	96.98	1596.8	18	-0.2	799.407	2	41.8472	30059	20201209_Lumos_Ritcher_sample148_17.raw	894000	1	1	Proline Oxidation;Proline Oxidation	P3:Proline Oxidation:70.27;P12:Proline Oxidation:12.81	AnsAna_Spatula_platalea_D2007020414.COL1a2_Anas.consensus:AnsAna_Chloephaga_rubidiceps_D2104051194.COL1a2_Anas.consensus:AnsAna_Cygnus_atratus_GCA_013377495.2.COL1a2_Anas.consensus:AnsAna_Plectropterus_gambensis_B10K-D-WWT-22.COL1a2_Anas.consensus:AnsAna_Aythya_affinis_CL200153793_L02.COL1a2_Anas.consensus:AnsAna_Somateria_spectabilis_D2006016067.COL1a2_Anas.consensus:AnsAna_Dendrocygna_guttata_B…	DB Search
GLP(+15.99)GISGATGEP(+15.99)GPLGVSG	97.74	1653.82	19	-0.7	827.917	2	41.3897	29416	20201209_Lumos_Ritcher_sample148_17.raw	166000	1	1	Proline Oxidation;Proline Oxidation	P3:Proline Oxidation:90.99;P12:Proline Oxidation:20.41	AnsAna_Spatula_platalea_D2007020414.COL1a2_Anas.consensus:AnsAna_Chloephaga_rubidiceps_D2104051194.COL1a2_Anas.consensus:AnsAna_Cygnus_atratus_GCA_013377495.2.COL1a2_Anas.consensus:AnsAna_Plectropterus_gambensis_B10K-D-WWT-22.COL1a2_Anas.consensus:AnsAna_Aythya_affinis_CL200153793_L02.COL1a2_Anas.consensus:AnsAna_Somateria_spectabilis_D2006016067.COL1a2_Anas.consensus:AnsAna_Dendrocygna_guttata_B…	DB Search
GLP(+15.99)GISGATGEP(+15.99)GPLGVSGP(+15.99)P(+15.99)GAR	43.42	2164.08	24	-0.9	722.365	3	35.9145	23948	20201209_Lumos_Ritcher_sample148_17.raw	1140000	1	1	Proline Oxidation;Proline Oxidation;Proline Oxidation;Proline Oxidation	P3:Proline Oxidation:76.82;P12:Proline Oxidation:39.76;P20:Proline Oxidation:83.65;P21:Proline Oxidation:77.80	AnsAna_Alopochen_aegyptiaca_D1907004292.COL1a2_Anas.consensus:AnsAna_Oxyura_jamaicensis_GCA_011077185.1.COL1a2_Anas.consensus:AnsAna_Lophonetta_specularioides_GCA_032165235.1.COL1a2_Anas.consensus:AnsAna_Anser_brachyrhynchus_GCA_002592135.1.COL1a2_Anas.consensus:AnsAna_Mareca_falcata_D2006016302.COL1a2_Anas.consensus:AnsAna_Cygnus_olor_GCA_009769485.2.COL1a2_Anas.consensus:AnsAna_Anser_indicus_GC…	SPIDER
GLP(+15.99)GISGATGEP(+15.99)GPLGVSGP(+15.99)PGAR	95.96	2148.08	24	3.4	1075.05	2	36.3422	24016	20201209_Lumos_Ritcher_sample148_17.raw	283000000	5	5	Proline Oxidation;Proline Oxidation;Proline Oxidation	P3:Proline Oxidation:67.73;P12:Proline Oxidation:14.04;P20:Proline Oxidation:0.00	AnsAna_Spatula_platalea_D2007020414.COL1a2_Anas.consensus:AnsAna_Chloephaga_rubidiceps_D2104051194.COL1a2_Anas.consensus:AnsAna_Cygnus_atratus_GCA_013377495.2.COL1a2_Anas.consensus:AnsAna_Plectropterus_gambensis_B10K-D-WWT-22.COL1a2_Anas.consensus:AnsAna_Aythya_affinis_CL200153793_L02.COL1a2_Anas.consensus:AnsAna_Somateria_spectabilis_D2006016067.COL1a2_Anas.consensus:AnsAna_Dendrocygna_guttata_B…	DB Search
GLP(+15.99)GISGATGEP(+15.99)GPLGVSGPP(+15.99)G	97.66	1920.94	22	-0.2	961.479	2	40.8516	28986	20201209_Lumos_Ritcher_sample148_17.raw	1290000	1	1	Proline Oxidation;Proline Oxidation;Proline Oxidation	P3:Proline Oxidation:52.83;P12:Proline Oxidation:11.10;P21:Proline Oxidation:17.01	AnsAna_Spatula_platalea_D2007020414.COL1a2_Anas.consensus:AnsAna_Chloephaga_rubidiceps_D2104051194.COL1a2_Anas.consensus:AnsAna_Cygnus_atratus_GCA_013377495.2.COL1a2_Anas.consensus:AnsAna_Plectropterus_gambensis_B10K-D-WWT-22.COL1a2_Anas.consensus:AnsAna_Aythya_affinis_CL200153793_L02.COL1a2_Anas.consensus:AnsAna_Somateria_spectabilis_D2006016067.COL1a2_Anas.consensus:AnsAna_Dendrocygna_guttata_B…	DB Search
GLP(+15.99)GISGATGEP(+15.99)GPLGVSGPP(+15.99)GA	91.71	1991.98	23	0.2	996.997	2	41.8565	29719	20201209_Lumos_Ritcher_sample148_17.raw	516000	1	1	Proline Oxidation;Proline Oxidation;Proline Oxidation	P3:Proline Oxidation:30.57;P12:Proline Oxidation:0.00;P21:Proline Oxidation:17.01	AnsAna_Spatula_platalea_D2007020414.COL1a2_Anas.consensus:AnsAna_Chloephaga_rubidiceps_D2104051194.COL1a2_Anas.consensus:AnsAna_Cygnus_atratus_GCA_013377495.2.COL1a2_Anas.consensus:AnsAna_Plectropterus_gambensis_B10K-D-WWT-22.COL1a2_Anas.consensus:AnsAna_Aythya_affinis_CL200153793_L02.COL1a2_Anas.consensus:AnsAna_Somateria_spectabilis_D2006016067.COL1a2_Anas.consensus:AnsAna_Dendrocygna_guttata_B…	DB Search
GLP(+15.99)GISGATGEP(+15.99)GPLGVSGPP(+15.99)GAR	95.6	2148.08	24	-0.5	1075.05	2	36.8753	24574	20201209_Lumos_Ritcher_sample148_17.raw	430000000	2	2	Proline Oxidation;Proline Oxidation;Proline Oxidation	P3:Proline Oxidation:200.88;P12:Proline Oxidation:25.86;P21:Proline Oxidation:8.69	AnsAna_Spatula_platalea_D2007020414.COL1a2_Anas.consensus:AnsAna_Chloephaga_rubidiceps_D2104051194.COL1a2_Anas.consensus:AnsAna_Cygnus_atratus_GCA_013377495.2.COL1a2_Anas.consensus:AnsAna_Plectropterus_gambensis_B10K-D-WWT-22.COL1a2_Anas.consensus:AnsAna_Aythya_affinis_CL200153793_L02.COL1a2_Anas.consensus:AnsAna_Somateria_spectabilis_D2006016067.COL1a2_Anas.consensus:AnsAna_Dendrocygna_guttata_B…	DB Search
GLP(+15.99)GISGATGEPGP(+15.99)LGVSGP(+15.99)PGAR	83.78	2148.08	24	0.2	717.034	3	39.2483	26989	20201209_Lumos_Ritcher_sample148_17.raw	91500	1	1	Proline Oxidation;Proline Oxidation;Proline Oxidation	P3:Proline Oxidation:0.00;P14:Proline Oxidation:0.00;P20:Proline Oxidation:0.00	AnsAna_Lophodytes_cucullatus_B10K-D-WWT-15.COL1a2_Anas.consensus:AnsAna_Spatula_platalea_D2007020414.COL1a2_Anas.consensus:AnsAna_Anas_gibberifrons_D2007020344.COL1a2_Anas.consensus:AnsAna_Aythya_baeri_GCA_026413565.1.COL1a2_Anas.consensus:AnsAna_Cyanochen_cyanoptera_B10K-D-WWT-10.COL1a2_Anas.consensus:AnsAna_Chloephaga_rubidiceps_D2104051194.COL1a2_Anas.consensus:AnsAna_Cygnus_atratus_GCA_013377…	DB Search
GLP(+15.99)GISGATGEPGPL	87.13	1337.68	15	0	669.849	2	42.981	31107	20201209_Lumos_Ritcher_sample148_17.raw	1050000	1	1	Proline Oxidation	P3:Proline Oxidation:83.11	AnsAna_Spatula_platalea_D2007020414.COL1a2_Anas.consensus:AnsAna_Chloephaga_rubidiceps_D2104051194.COL1a2_Anas.consensus:AnsAna_Cygnus_atratus_GCA_013377495.2.COL1a2_Anas.consensus:AnsAna_Plectropterus_gambensis_B10K-D-WWT-22.COL1a2_Anas.consensus:AnsAna_Aythya_affinis_CL200153793_L02.COL1a2_Anas.consensus:AnsAna_Somateria_spectabilis_D2006016067.COL1a2_Anas.consensus:AnsAna_Dendrocygna_guttata_B…	DB Search
GLP(+15.99)GISGATGEPGPLGVSGP(+15.99)PGAR	85.4	2132.09	24	1.1	1067.05	2	38.5923	26797	20201209_Lumos_Ritcher_sample148_17.raw	14600000	1	1	Proline Oxidation;Proline Oxidation	P3:Proline Oxidation:27.52;P20:Proline Oxidation:0.00	AnsAna_Spatula_platalea_D2007020414.COL1a2_Anas.consensus:AnsAna_Chloephaga_rubidiceps_D2104051194.COL1a2_Anas.consensus:AnsAna_Cygnus_atratus_GCA_013377495.2.COL1a2_Anas.consensus:AnsAna_Plectropterus_gambensis_B10K-D-WWT-22.COL1a2_Anas.consensus:AnsAna_Aythya_affinis_CL200153793_L02.COL1a2_Anas.consensus:AnsAna_Somateria_spectabilis_D2006016067.COL1a2_Anas.consensus:AnsAna_Dendrocygna_guttata_B…	DB Search
GLP(+15.99)GISGATGEPGPLGVSGPP(+15.99)GAR	94.6	2132.09	24	5.3	711.706	3	38.5934	25797	20201209_Lumos_Ritcher_sample148_17.raw	36300000	2	2	Proline Oxidation;Proline Oxidation	P3:Proline Oxidation:60.15;P21:Proline Oxidation:12.28	AnsAna_Spatula_platalea_D2007020414.COL1a2_Anas.consensus:AnsAna_Chloephaga_rubidiceps_D2104051194.COL1a2_Anas.consensus:AnsAna_Cygnus_atratus_GCA_013377495.2.COL1a2_Anas.consensus:AnsAna_Plectropterus_gambensis_B10K-D-WWT-22.COL1a2_Anas.consensus:AnsAna_Aythya_affinis_CL200153793_L02.COL1a2_Anas.consensus:AnsAna_Somateria_spectabilis_D2006016067.COL1a2_Anas.consensus:AnsAna_Dendrocygna_guttata_B…	DB Search
GLP(+15.99)GISGATGEPGPLGVSGPPGAR	93.59	2116.09	24	-0.1	1059.05	2	39.7781	27598	20201209_Lumos_Ritcher_sample148_17.raw	655000	2	2	Proline Oxidation	P3:Proline Oxidation:77.76	AnsAna_Spatula_platalea_D2007020414.COL1a2_Anas.consensus:AnsAna_Chloephaga_rubidiceps_D2104051194.COL1a2_Anas.consensus:AnsAna_Cygnus_atratus_GCA_013377495.2.COL1a2_Anas.consensus:AnsAna_Plectropterus_gambensis_B10K-D-WWT-22.COL1a2_Anas.consensus:AnsAna_Aythya_affinis_CL200153793_L02.COL1a2_Anas.consensus:AnsAna_Somateria_spectabilis_D2006016067.COL1a2_Anas.consensus:AnsAna_Dendrocygna_guttata_B…	DB Search
GLP(+15.99)GPIGP(+15.99)P(+15.99)GPR	45.08	1161.61	12	-0.8	581.814	2	24.4968	12070	20201209_Lumos_Ritcher_sample148_17.raw	2100000	1	1	Proline Oxidation;Proline Oxidation;Proline Oxidation	P3:Proline Oxidation:15.21;P8:Proline Oxidation:18.00;P9:Proline Oxidation:4.64	AnsAna_Anas_undulata_B10K-D-IZW-61.COL1a1_Cyg-Gall.consensus:AnsAna_Aythya_americana_D2006016050.COL1a1_Cyg-Gall.consensus:AnsAna_Pteronetta_hartlaubii_D2102046034.COL1a1_Cyg-Gall.consensus:AnsAna_Cereopsis_novaehollandiae_B10K-D-IZW-75.COL1a1_Cyg-Gall.consensus:AnsAna_Branta_leucopsis_DBGNRM65.COL1a1_Cyg-Gall.consensus:AnsAna_Aythya_marila_GCA_029042245.1.COL1a1_Cyg-Gall.consensus:AnsAna_Tadorna…	DB Search
GLP(+15.99)GPIGPAGAR	74.69	1077.59	12	0.4	539.804	2	26.1074	13442	20201209_Lumos_Ritcher_sample148_17.raw		0	0	Proline Oxidation	P3:Proline Oxidation:11.50	AnsAna_Spatula_platalea_D2007020414.COL1a2_Anas.consensus:AnsAna_Chloephaga_rubidiceps_D2104051194.COL1a2_Anas.consensus:AnsAna_Cygnus_atratus_GCA_013377495.2.COL1a2_Anas.consensus:AnsAna_Plectropterus_gambensis_B10K-D-WWT-22.COL1a2_Anas.consensus:AnsAna_Aythya_affinis_CL200153793_L02.COL1a2_Anas.consensus:AnsAna_Somateria_spectabilis_D2006016067.COL1a2_Anas.consensus:AnsAna_Dendrocygna_guttata_B…	DB Search
GLP(+15.99)GPP(+15.99)GAP(+15.99)GPQGF	91.46	1295.61	14	-0.3	648.814	2	34.4734	21948	20201209_Lumos_Ritcher_sample148_17.raw	14500000	1	1	Proline Oxidation;Proline Oxidation;Proline Oxidation	P3:Proline Oxidation:29.25;P6:Proline Oxidation:21.94;P9:Proline Oxidation:48.87	AnsAna_Neochen_jubata_B10K-D-WWT-20.COL1a1_Cyg-Gall.consensus:AnsAna_Cygnus_cygnus_GCA_014362685.1.COL1a1_Cygnus.BMBB01006201.1:AnsAna_Anas_undulata_B10K-D-IZW-61.COL1a1_Cyg-Gall.consensus:AnsAna_Mareca_penelope_GCA_036026335.1.COL1a1_Cyg-Gall.consensus:AnsAna_Spatula_rhynchotis_GCA_034783165.1.COL1a1_Cyg-Gall.consensus:AnsAna_Aythya_marila_GCA_029042245.1.COL1a1_Cyg-Gall.consensus:AnsAna_Anser_c…	DB Search
GLP(+15.99)GPPGAP(+15.99)GPQGF	42.97	1279.62	14	1.5	640.818	2	36.3661	24124	20201209_Lumos_Ritcher_sample148_17.raw	377000	1	1	Proline Oxidation;Proline Oxidation	P3:Proline Oxidation:11.10;P9:Proline Oxidation:10.42	AnsAna_Neochen_jubata_B10K-D-WWT-20.COL1a1_Cyg-Gall.consensus:AnsAna_Cygnus_cygnus_GCA_014362685.1.COL1a1_Cygnus.BMBB01006201.1:AnsAna_Anas_undulata_B10K-D-IZW-61.COL1a1_Cyg-Gall.consensus:AnsAna_Mareca_penelope_GCA_036026335.1.COL1a1_Cyg-Gall.consensus:AnsAna_Spatula_rhynchotis_GCA_034783165.1.COL1a1_Cyg-Gall.consensus:AnsAna_Aythya_marila_GCA_029042245.1.COL1a1_Cyg-Gall.consensus:AnsAna_Anser_c…	DB Search
GLP(+15.99)GTAGL	68.24	700.375	8	0.3	701.383	1	32.7935	20272	20201209_Lumos_Ritcher_sample148_17.raw	1520000	1	1	Proline Oxidation	P3:Proline Oxidation:1000.00	AnsAna_Anas_undulata_B10K-D-IZW-61.COL1a1_Cyg-Gall.consensus:AnsAna_Aythya_americana_D2006016050.COL1a1_Cyg-Gall.consensus:AnsAna_Aythya_marila_GCA_029042245.1.COL1a1_Cyg-Gall.consensus:AnsAna_Anser_cygnoides_GCA_025388735.1.COL1a1_Cyg-Gall.consensus:AnsAna_Branta_hutchinsii_GCA_032270845.1.COL1a1_Cyg-Gall.consensus:AnsAna_Spatula_querquedula_GCA_032191525.1.COL1a1_Cyg-Gall.consensus:AnsAna_Aix_g…	DB Search
GLP(+15.99)GTAGLP(+15.99)GM(+15.99)K	43.45	1145.58	12	0.1	573.795	2	24.4968	11451	20201209_Lumos_Ritcher_sample148_17.raw	89200000	1	1	Proline Oxidation;Proline Oxidation;Oxidation (M)	P3:Proline Oxidation:1000.00;P9:Proline Oxidation:1000.00;M11:Oxidation (M):1000.00	AnsAna_Cygnus_atratus_GCA_013377495.2.COL1a1_Cyg-Gall.consensus:AnsAna_Aythya_marila_GCA_029042245.1.COL1a1_Cyg-Gall.consensus:AnsAna_Aythya_baeri_GCA_026413565.1.COL1a1_Cyg-Gall.consensus:AnsAna_Anser_cygnoides_GCA_025388735.1.COL1a1_Cyg-Gall.consensus:AnsAna_Anas_bernieri_GCA_032165215.1.COL1a1_Cyg-Gall.consensus:AnsAna_Branta_hutchinsii_GCA_032270845.1.COL1a1_Cyg-Gall.consensus:AnsAna_Aythya_f…	PEAKS PTM
GLP(+15.99)GVAGAP(+15.99)GLP(+15.99)GPR	76.47	1362.73	15	-0.7	682.37	2	30.8984	18328	20201209_Lumos_Ritcher_sample148_17.raw		0	0	Proline Oxidation;Proline Oxidation;Proline Oxidation	P3:Proline Oxidation:106.36;P9:Proline Oxidation:15.48;P12:Proline Oxidation:0.00	AnsAna_Spatula_platalea_D2007020414.COL1a2_Anas.consensus:AnsAna_Chloephaga_rubidiceps_D2104051194.COL1a2_Anas.consensus:AnsAna_Cygnus_atratus_GCA_013377495.2.COL1a2_Anas.consensus:AnsAna_Plectropterus_gambensis_B10K-D-WWT-22.COL1a2_Anas.consensus:AnsAna_Aythya_affinis_CL200153793_L02.COL1a2_Anas.consensus:AnsAna_Somateria_spectabilis_D2006016067.COL1a2_Anas.consensus:AnsAna_Dendrocygna_guttata_B…	DB Search
GLPGAIGAP(+15.99)GPAGGAGDR	90.99	1505.76	18	-3.3	753.884	2	28.2949	15714	20201209_Lumos_Ritcher_sample148_17.raw	445000	1	1	Proline Oxidation	P9:Proline Oxidation:22.85	AnsAna_Spatula_platalea_D2007020414.COL1a2_Anas.consensus:AnsAna_Chloephaga_rubidiceps_D2104051194.COL1a2_Anas.consensus:AnsAna_Cygnus_atratus_GCA_013377495.2.COL1a2_Anas.consensus:AnsAna_Plectropterus_gambensis_B10K-D-WWT-22.COL1a2_Anas.consensus:AnsAna_Aythya_affinis_CL200153793_L02.COL1a2_Anas.consensus:AnsAna_Somateria_spectabilis_D2006016067.COL1a2_Anas.consensus:AnsAna_Dendrocygna_guttata_B…	DB Search
GLPGAIGAP(+15.99)GPAGGAGDRGEGGPAGPAGPAGAR	41.81	2708.34	33	0.5	903.787	3	29.2436	16572	20201209_Lumos_Ritcher_sample148_17.raw	338000	1	1	Proline Oxidation	P9:Proline Oxidation:0.00	AnsAna_Spatula_platalea_D2007020414.COL1a2_Anas.consensus:AnsAna_Chloephaga_rubidiceps_D2104051194.COL1a2_Anas.consensus:AnsAna_Cygnus_atratus_GCA_013377495.2.COL1a2_Anas.consensus:AnsAna_Aythya_affinis_CL200153793_L02.COL1a2_Anas.consensus:AnsAna_Somateria_spectabilis_D2006016067.COL1a2_Anas.consensus:AnsAna_Dendrocygna_guttata_B10K-D-IZW-85.COL1a2_Anas.consensus:AnsAna_Dendrocygna_arborea_B10K-…	DB Search
GLPGESGAVGPAGPIGSR	66.22	1577.82	18	0.8	789.916	2	26.0731	13405	20201209_Lumos_Ritcher_sample148_17.raw		0	0			sp|P02467|CO1A2_CHICK	DB Search
GLPGISGATGEP(+15.99)GP(+15.99)LGVSGP(+15.99)PGAR	45.74	2148.08	24	-2.2	717.033	3	33.7915	21383	20201209_Lumos_Ritcher_sample148_17.raw		0	0	Proline Oxidation;Proline Oxidation;Proline Oxidation	P12:Proline Oxidation:7.81;P14:Proline Oxidation:7.03;P20:Proline Oxidation:0.00	AnsAna_Spatula_platalea_D2007020414.COL1a2_Anas.consensus:AnsAna_Chloephaga_rubidiceps_D2104051194.COL1a2_Anas.consensus:AnsAna_Cygnus_atratus_GCA_013377495.2.COL1a2_Anas.consensus:AnsAna_Plectropterus_gambensis_B10K-D-WWT-22.COL1a2_Anas.consensus:AnsAna_Aythya_affinis_CL200153793_L02.COL1a2_Anas.consensus:AnsAna_Somateria_spectabilis_D2006016067.COL1a2_Anas.consensus:AnsAna_Dendrocygna_guttata_B…	DB Search
GLQ(+0.98)GP(+15.99)PGPPGSPGEQGPSGASGPAGPR	98.99	2382.12	27	-1.7	795.046	3	26.7176	14090	20201209_Lumos_Ritcher_sample148_17.raw		0	0	Deamidation (NQ);Proline Oxidation	Q3:Deamidation (NQ):16.40;P5:Proline Oxidation:0.00	AnsAna_Aix_sponsa_GCA_032270905.1.COL1a1_Cyg-Gall.consensus	DB Search
GLQ(+0.98)GPP(+15.99)GPP(+15.99)GAPGEQGPSGASGPAGPR	93.37	2382.12	27	-1.2	1192.07	2	26.6222	13988	20201209_Lumos_Ritcher_sample148_17.raw		0	0	Deamidation (NQ);Proline Oxidation;Proline Oxidation	Q3:Deamidation (NQ):47.72;P6:Proline Oxidation:17.01;P9:Proline Oxidation:17.01	AnsAna_Anas_undulata_B10K-D-IZW-61.COL1a1_Cyg-Gall.consensus:AnsAna_Aythya_americana_D2006016050.COL1a1_Cyg-Gall.consensus:AnsAna_Pteronetta_hartlaubii_D2102046034.COL1a1_Cyg-Gall.consensus:AnsAna_Cereopsis_novaehollandiae_B10K-D-IZW-75.COL1a1_Cyg-Gall.consensus:AnsAna_Branta_leucopsis_DBGNRM65.COL1a1_Cyg-Gall.consensus:AnsAna_Aythya_marila_GCA_029042245.1.COL1a1_Cyg-Gall.consensus:AnsAna_Tadorna…	DB Search
GLQ(+0.98)GPP(+15.99)GPPGAP(+15.99)GEQGPSGASGPAGPR	92.2	2382.12	27	2.1	1192.07	2	26.4021	13816	20201209_Lumos_Ritcher_sample148_17.raw	1020000	2	2	Deamidation (NQ);Proline Oxidation;Proline Oxidation	Q3:Deamidation (NQ):69.02;P6:Proline Oxidation:17.01;P12:Proline Oxidation:28.36	AnsAna_Anas_undulata_B10K-D-IZW-61.COL1a1_Cyg-Gall.consensus:AnsAna_Aythya_americana_D2006016050.COL1a1_Cyg-Gall.consensus:AnsAna_Pteronetta_hartlaubii_D2102046034.COL1a1_Cyg-Gall.consensus:AnsAna_Cereopsis_novaehollandiae_B10K-D-IZW-75.COL1a1_Cyg-Gall.consensus:AnsAna_Branta_leucopsis_DBGNRM65.COL1a1_Cyg-Gall.consensus:AnsAna_Aythya_marila_GCA_029042245.1.COL1a1_Cyg-Gall.consensus:AnsAna_Tadorna…	DB Search
GLQ(+0.98)GPP(+15.99)GPPGSP(+15.99)GEQGPSGASGPAGPR	93.09	2398.11	27	0.8	1200.07	2	24.7609	12133	20201209_Lumos_Ritcher_sample148_17.raw	20000000	2	2	Deamidation (NQ);Proline Oxidation;Proline Oxidation	Q3:Deamidation (NQ):94.89;P6:Proline Oxidation:12.28;P12:Proline Oxidation:11.27	AnsAna_Aix_sponsa_GCA_032270905.1.COL1a1_Cyg-Gall.consensus	DB Search
GLQ(+0.98)GPP(+15.99)GPPGSPGEQ(+0.98)GPSGASGPAGPR	91.18	2383.1	27	-1.9	795.374	3	26.8127	14191	20201209_Lumos_Ritcher_sample148_17.raw		0	0	Deamidation (NQ);Proline Oxidation;Deamidation (NQ)	Q3:Deamidation (NQ):1000.00;P6:Proline Oxidation:10.11;Q15:Deamidation (NQ):1000.00	AnsAna_Aix_sponsa_GCA_032270905.1.COL1a1_Cyg-Gall.consensus	DB Search
GLQ(+0.98)GPPGP(+15.99)PGAPGEQGPSGASGPAGPR	93.75	2366.12	27	-0.8	789.715	3	27.7837	15226	20201209_Lumos_Ritcher_sample148_17.raw	502000	1	1	Deamidation (NQ);Proline Oxidation	Q3:Deamidation (NQ):28.64;P8:Proline Oxidation:7.65	AnsAna_Anas_undulata_B10K-D-IZW-61.COL1a1_Cyg-Gall.consensus:AnsAna_Aythya_americana_D2006016050.COL1a1_Cyg-Gall.consensus:AnsAna_Pteronetta_hartlaubii_D2102046034.COL1a1_Cyg-Gall.consensus:AnsAna_Cereopsis_novaehollandiae_B10K-D-IZW-75.COL1a1_Cyg-Gall.consensus:AnsAna_Branta_leucopsis_DBGNRM65.COL1a1_Cyg-Gall.consensus:AnsAna_Aythya_marila_GCA_029042245.1.COL1a1_Cyg-Gall.consensus:AnsAna_Tadorna…	DB Search
GLQGLP(+15.99)GLAGQHGDQGPP(+15.99)GN(+0.98)NGPAGPR	93.66	2551.22	27	-0.3	851.412	3	31.5659	19000	20201209_Lumos_Ritcher_sample148_17.raw	801000	1	1	Proline Oxidation;Proline Oxidation;Deamidation (NQ)	P6:Proline Oxidation:56.41;P18:Proline Oxidation:10.11;N20:Deamidation (NQ):10.11	AnsAna_Spatula_platalea_D2007020414.COL1a2_Anas.consensus:AnsAna_Chloephaga_rubidiceps_D2104051194.COL1a2_Anas.consensus:AnsAna_Cygnus_atratus_GCA_013377495.2.COL1a2_Anas.consensus:AnsAna_Plectropterus_gambensis_B10K-D-WWT-22.COL1a2_Anas.consensus:AnsAna_Aythya_affinis_CL200153793_L02.COL1a2_Anas.consensus:AnsAna_Somateria_spectabilis_D2006016067.COL1a2_Anas.consensus:AnsAna_Dendrocygna_guttata_B…	DB Search
GLQGLP(+15.99)GLAGQHGDQGPP(+15.99)GNN(+0.98)GPAGPR	66.38	2551.22	27	-9.8	851.404	3	31.9602	19496	20201209_Lumos_Ritcher_sample148_17.raw		0	0	Proline Oxidation;Proline Oxidation;Deamidation (NQ)	P6:Proline Oxidation:20.33;P18:Proline Oxidation:9.34;N21:Deamidation (NQ):0.00	AnsAna_Spatula_platalea_D2007020414.COL1a2_Anas.consensus:AnsAna_Chloephaga_rubidiceps_D2104051194.COL1a2_Anas.consensus:AnsAna_Cygnus_atratus_GCA_013377495.2.COL1a2_Anas.consensus:AnsAna_Plectropterus_gambensis_B10K-D-WWT-22.COL1a2_Anas.consensus:AnsAna_Aythya_affinis_CL200153793_L02.COL1a2_Anas.consensus:AnsAna_Somateria_spectabilis_D2006016067.COL1a2_Anas.consensus:AnsAna_Dendrocygna_guttata_B…	DB Search
GLQGLP(+15.99)GLAGQHGDQGPP(+15.99)GNNGPAGPR	87.26	2550.23	27	-6.7	851.079	3	32.1514	19684	20201209_Lumos_Ritcher_sample148_17.raw		0	0	Proline Oxidation;Proline Oxidation	P6:Proline Oxidation:15.66;P18:Proline Oxidation:10.11	AnsAna_Spatula_platalea_D2007020414.COL1a2_Anas.consensus:AnsAna_Chloephaga_rubidiceps_D2104051194.COL1a2_Anas.consensus:AnsAna_Cygnus_atratus_GCA_013377495.2.COL1a2_Anas.consensus:AnsAna_Plectropterus_gambensis_B10K-D-WWT-22.COL1a2_Anas.consensus:AnsAna_Aythya_affinis_CL200153793_L02.COL1a2_Anas.consensus:AnsAna_Somateria_spectabilis_D2006016067.COL1a2_Anas.consensus:AnsAna_Dendrocygna_guttata_B…	DB Search
GLQGP(+15.99)P(+15.99)GPPGSPGEQ(+0.98)GPSGASGPAGPR	84.29	2398.11	27	-0.1	800.379	3	31.6568	19170	20201209_Lumos_Ritcher_sample148_17.raw		0	0	Proline Oxidation;Proline Oxidation;Deamidation (NQ)	P5:Proline Oxidation:5.55;P6:Proline Oxidation:6.63;Q15:Deamidation (NQ):3.99	AnsAna_Aix_sponsa_GCA_032270905.1.COL1a1_Cyg-Gall.consensus	DB Search
GLQGP(+15.99)PGPPGSP(+15.99)GEQGPSGASGPAGPR	87.81	2397.13	27	0.6	800.051	3	23.8172	11133	20201209_Lumos_Ritcher_sample148_17.raw		0	0	Proline Oxidation;Proline Oxidation	P5:Proline Oxidation:0.00;P12:Proline Oxidation:9.45	AnsAna_Aix_sponsa_GCA_032270905.1.COL1a1_Cyg-Gall.consensus	DB Search
GLQGPP(+15.99)GP(+15.99)PGAP(+15.99)GEQGPSGASGPAGPR	91.93	2397.13	27	-0.9	800.05	3	24.4968	11364	20201209_Lumos_Ritcher_sample148_17.raw	8760000	1	1	Proline Oxidation;Proline Oxidation;Proline Oxidation	P6:Proline Oxidation:17.01;P8:Proline Oxidation:0.00;P12:Proline Oxidation:24.24	AnsAna_Anas_undulata_B10K-D-IZW-61.COL1a1_Cyg-Gall.consensus:AnsAna_Aythya_americana_D2006016050.COL1a1_Cyg-Gall.consensus:AnsAna_Pteronetta_hartlaubii_D2102046034.COL1a1_Cyg-Gall.consensus:AnsAna_Cereopsis_novaehollandiae_B10K-D-IZW-75.COL1a1_Cyg-Gall.consensus:AnsAna_Branta_leucopsis_DBGNRM65.COL1a1_Cyg-Gall.consensus:AnsAna_Aythya_marila_GCA_029042245.1.COL1a1_Cyg-Gall.consensus:AnsAna_Tadorna…	DB Search
GLQGPP(+15.99)GPP(+15.99)GAP(+15.99)GEQGPSGASGPAGPR	94.05	2397.13	27	-0.6	1199.57	2	24.1549	11484	20201209_Lumos_Ritcher_sample148_17.raw		0	0	Proline Oxidation;Proline Oxidation;Proline Oxidation	P6:Proline Oxidation:12.28;P9:Proline Oxidation:40.00;P12:Proline Oxidation:14.62	AnsAna_Anas_undulata_B10K-D-IZW-61.COL1a1_Cyg-Gall.consensus:AnsAna_Aythya_americana_D2006016050.COL1a1_Cyg-Gall.consensus:AnsAna_Pteronetta_hartlaubii_D2102046034.COL1a1_Cyg-Gall.consensus:AnsAna_Cereopsis_novaehollandiae_B10K-D-IZW-75.COL1a1_Cyg-Gall.consensus:AnsAna_Branta_leucopsis_DBGNRM65.COL1a1_Cyg-Gall.consensus:AnsAna_Aythya_marila_GCA_029042245.1.COL1a1_Cyg-Gall.consensus:AnsAna_Tadorna…	DB Search
GLQGPP(+15.99)GPPGAP(+15.99)GEQ(+0.98)GPSGASGPAGPR	90.04	2382.12	27	1.6	795.049	3	26.1134	13449	20201209_Lumos_Ritcher_sample148_17.raw		0	0	Proline Oxidation;Proline Oxidation;Deamidation (NQ)	P6:Proline Oxidation:0.00;P12:Proline Oxidation:8.02;Q15:Deamidation (NQ):13.17	AnsAna_Anas_undulata_B10K-D-IZW-61.COL1a1_Cyg-Gall.consensus:AnsAna_Aythya_americana_D2006016050.COL1a1_Cyg-Gall.consensus:AnsAna_Pteronetta_hartlaubii_D2102046034.COL1a1_Cyg-Gall.consensus:AnsAna_Cereopsis_novaehollandiae_B10K-D-IZW-75.COL1a1_Cyg-Gall.consensus:AnsAna_Branta_leucopsis_DBGNRM65.COL1a1_Cyg-Gall.consensus:AnsAna_Aythya_marila_GCA_029042245.1.COL1a1_Cyg-Gall.consensus:AnsAna_Tadorna…	DB Search
GLQGPP(+15.99)GPPGAP(+15.99)GEQGPSGASGPAGPR	91.46	2381.14	27	0	1191.58	2	25.649	12964	20201209_Lumos_Ritcher_sample148_17.raw	4700000	2	2	Proline Oxidation;Proline Oxidation	P6:Proline Oxidation:17.01;P12:Proline Oxidation:30.64	AnsAna_Anas_undulata_B10K-D-IZW-61.COL1a1_Cyg-Gall.consensus:AnsAna_Aythya_americana_D2006016050.COL1a1_Cyg-Gall.consensus:AnsAna_Pteronetta_hartlaubii_D2102046034.COL1a1_Cyg-Gall.consensus:AnsAna_Cereopsis_novaehollandiae_B10K-D-IZW-75.COL1a1_Cyg-Gall.consensus:AnsAna_Branta_leucopsis_DBGNRM65.COL1a1_Cyg-Gall.consensus:AnsAna_Aythya_marila_GCA_029042245.1.COL1a1_Cyg-Gall.consensus:AnsAna_Tadorna…	DB Search
GLQGPP(+15.99)GPPGSP(+15.99)GEQGPSGASGPAGPR	91.07	2397.13	27	-0.9	800.05	3	24.4968	11955	20201209_Lumos_Ritcher_sample148_17.raw	8760000	1	1	Proline Oxidation;Proline Oxidation	P6:Proline Oxidation:10.11;P12:Proline Oxidation:16.66	AnsAna_Aix_sponsa_GCA_032270905.1.COL1a1_Cyg-Gall.consensus	DB Search
GLQGPPGP(+15.99)PGAPGEQGPSGASGPAGPR	85.3	2365.14	27	-4.4	789.384	3	27.7042	15133	20201209_Lumos_Ritcher_sample148_17.raw		0	0	Proline Oxidation	P8:Proline Oxidation:0.00	AnsAna_Anas_undulata_B10K-D-IZW-61.COL1a1_Cyg-Gall.consensus:AnsAna_Aythya_americana_D2006016050.COL1a1_Cyg-Gall.consensus:AnsAna_Pteronetta_hartlaubii_D2102046034.COL1a1_Cyg-Gall.consensus:AnsAna_Cereopsis_novaehollandiae_B10K-D-IZW-75.COL1a1_Cyg-Gall.consensus:AnsAna_Branta_leucopsis_DBGNRM65.COL1a1_Cyg-Gall.consensus:AnsAna_Aythya_marila_GCA_029042245.1.COL1a1_Cyg-Gall.consensus:AnsAna_Tadorna…	DB Search
GLTGPIGP(+15.99)PGPAGAP(+15.99)GD	98.25	1461.71	17	0.2	731.862	2	32.8414	20188	20201209_Lumos_Ritcher_sample148_17.raw	3900000	1	1	Proline Oxidation;Proline Oxidation	P8:Proline Oxidation:10.11;P15:Proline Oxidation:38.26	AnsAna_Anas_undulata_B10K-D-IZW-61.COL1a1_Cyg-Gall.consensus:AnsAna_Aythya_americana_D2006016050.COL1a1_Cyg-Gall.consensus:AnsAna_Cereopsis_novaehollandiae_B10K-D-IZW-75.COL1a1_Cyg-Gall.consensus:AnsAna_Branta_leucopsis_DBGNRM65.COL1a1_Cyg-Gall.consensus:AnsAna_Aythya_marila_GCA_029042245.1.COL1a1_Cyg-Gall.consensus:AnsAna_Tadorna_tadorna_DBGNRM58.COL1a1_Cyg-Gall.consensus:AnsAna_Anser_cygnoides_…	DB Search
GLTGPIGP(+15.99)PGPAGAP(+15.99)GDKGEAGPP(+15.99)GPAG	102.06	2396.16	28	-0.8	799.727	3	30.7945	18130	20201209_Lumos_Ritcher_sample148_17.raw	229000	1	1	Proline Oxidation;Proline Oxidation;Proline Oxidation	P8:Proline Oxidation:0.00;P15:Proline Oxidation:36.24;P24:Proline Oxidation:17.01	AnsAna_Anas_undulata_B10K-D-IZW-61.COL1a1_Cyg-Gall.consensus:AnsAna_Aythya_americana_D2006016050.COL1a1_Cyg-Gall.consensus:AnsAna_Cereopsis_novaehollandiae_B10K-D-IZW-75.COL1a1_Cyg-Gall.consensus:AnsAna_Branta_leucopsis_DBGNRM65.COL1a1_Cyg-Gall.consensus:AnsAna_Aythya_marila_GCA_029042245.1.COL1a1_Cyg-Gall.consensus:AnsAna_Tadorna_tadorna_DBGNRM58.COL1a1_Cyg-Gall.consensus:AnsAna_Anser_cygnoides_…	DB Search
GLTGPIGP(+15.99)PGPAGAP(+15.99)GDKGEAGPP(+15.99)GPAGPT	101.24	2594.26	30	-0.9	865.76	3	31.6132	19128	20201209_Lumos_Ritcher_sample148_17.raw	810000	1	1	Proline Oxidation;Proline Oxidation;Proline Oxidation	P8:Proline Oxidation:0.00;P15:Proline Oxidation:10.87;P24:Proline Oxidation:14.02	AnsAna_Anas_undulata_B10K-D-IZW-61.COL1a1_Cyg-Gall.consensus:AnsAna_Aythya_americana_D2006016050.COL1a1_Cyg-Gall.consensus:AnsAna_Cereopsis_novaehollandiae_B10K-D-IZW-75.COL1a1_Cyg-Gall.consensus:AnsAna_Branta_leucopsis_DBGNRM65.COL1a1_Cyg-Gall.consensus:AnsAna_Aythya_marila_GCA_029042245.1.COL1a1_Cyg-Gall.consensus:AnsAna_Tadorna_tadorna_DBGNRM58.COL1a1_Cyg-Gall.consensus:AnsAna_Anser_cygnoides_…	DB Search
GLTGPIGP(+15.99)PGPAGAP(+15.99)GDKGEAGPP(+15.99)GPAGPTGAR	96.08	2878.42	33	-5.1	960.476	3	29.985	17311	20201209_Lumos_Ritcher_sample148_17.raw	366000	1	1	Proline Oxidation;Proline Oxidation;Proline Oxidation	P8:Proline Oxidation:0.00;P15:Proline Oxidation:16.51;P24:Proline Oxidation:17.01	AnsAna_Anas_undulata_B10K-D-IZW-61.COL1a1_Cyg-Gall.consensus:AnsAna_Aythya_americana_D2006016050.COL1a1_Cyg-Gall.consensus:AnsAna_Cereopsis_novaehollandiae_B10K-D-IZW-75.COL1a1_Cyg-Gall.consensus:AnsAna_Branta_leucopsis_DBGNRM65.COL1a1_Cyg-Gall.consensus:AnsAna_Aythya_marila_GCA_029042245.1.COL1a1_Cyg-Gall.consensus:AnsAna_Tadorna_tadorna_DBGNRM58.COL1a1_Cyg-Gall.consensus:AnsAna_Anser_cygnoides_…	DB Search
GLTGPIGPP(+15.99)GP(+15.99)AGAP(+15.99)GDK	63.86	1605.8	18	-0.2	803.907	2	27.9579	15416	20201209_Lumos_Ritcher_sample148_17.raw		0	0	Proline Oxidation;Proline Oxidation;Proline Oxidation	P9:Proline Oxidation:17.01;P11:Proline Oxidation:26.52;P15:Proline Oxidation:15.21	AnsAna_Anas_undulata_B10K-D-IZW-61.COL1a1_Cyg-Gall.consensus:AnsAna_Aythya_americana_D2006016050.COL1a1_Cyg-Gall.consensus:AnsAna_Cereopsis_novaehollandiae_B10K-D-IZW-75.COL1a1_Cyg-Gall.consensus:AnsAna_Branta_leucopsis_DBGNRM65.COL1a1_Cyg-Gall.consensus:AnsAna_Aythya_marila_GCA_029042245.1.COL1a1_Cyg-Gall.consensus:AnsAna_Tadorna_tadorna_DBGNRM58.COL1a1_Cyg-Gall.consensus:AnsAna_Anser_cygnoides_…	DB Search
GLTGPIGPP(+15.99)GPA	64.41	1048.56	12	0.5	525.285	2	33.8165	21409	20201209_Lumos_Ritcher_sample148_17.raw		0	0	Proline Oxidation	P9:Proline Oxidation:40.00	AnsAna_Anas_undulata_B10K-D-IZW-61.COL1a1_Cyg-Gall.consensus:AnsAna_Aythya_americana_D2006016050.COL1a1_Cyg-Gall.consensus:AnsAna_Cereopsis_novaehollandiae_B10K-D-IZW-75.COL1a1_Cyg-Gall.consensus:AnsAna_Branta_leucopsis_DBGNRM65.COL1a1_Cyg-Gall.consensus:AnsAna_Aythya_marila_GCA_029042245.1.COL1a1_Cyg-Gall.consensus:AnsAna_Tadorna_tadorna_DBGNRM58.COL1a1_Cyg-Gall.consensus:AnsAna_Anser_cygnoides_…	DB Search
GLTGPIGPP(+15.99)GPAGAP(+15.99)G	45.47	1346.68	16	-0.3	674.349	2	32.5951	19911	20201209_Lumos_Ritcher_sample148_17.raw	3090000	1	1	Proline Oxidation;Proline Oxidation	P9:Proline Oxidation:5.03;P15:Proline Oxidation:61.69	AnsAna_Anas_undulata_B10K-D-IZW-61.COL1a1_Cyg-Gall.consensus:AnsAna_Aythya_americana_D2006016050.COL1a1_Cyg-Gall.consensus:AnsAna_Cereopsis_novaehollandiae_B10K-D-IZW-75.COL1a1_Cyg-Gall.consensus:AnsAna_Branta_leucopsis_DBGNRM65.COL1a1_Cyg-Gall.consensus:AnsAna_Aythya_marila_GCA_029042245.1.COL1a1_Cyg-Gall.consensus:AnsAna_Tadorna_tadorna_DBGNRM58.COL1a1_Cyg-Gall.consensus:AnsAna_Anser_cygnoides_…	DB Search
GLTGPIGPP(+15.99)GPAGAP(+15.99)GDK	95.18	1589.8	18	0.2	795.91	2	28.3883	15984	20201209_Lumos_Ritcher_sample148_17.raw	162000000	2	2	Proline Oxidation;Proline Oxidation	P9:Proline Oxidation:21.94;P15:Proline Oxidation:64.53	AnsAna_Anas_undulata_B10K-D-IZW-61.COL1a1_Cyg-Gall.consensus:AnsAna_Aythya_americana_D2006016050.COL1a1_Cyg-Gall.consensus:AnsAna_Cereopsis_novaehollandiae_B10K-D-IZW-75.COL1a1_Cyg-Gall.consensus:AnsAna_Branta_leucopsis_DBGNRM65.COL1a1_Cyg-Gall.consensus:AnsAna_Aythya_marila_GCA_029042245.1.COL1a1_Cyg-Gall.consensus:AnsAna_Tadorna_tadorna_DBGNRM58.COL1a1_Cyg-Gall.consensus:AnsAna_Anser_cygnoides_…	DB Search
GLTGPIGPP(+15.99)GPAGAP(+15.99)GDKGEAGPP(+15.99)G	93.49	2171.05	25	0	724.69	3	29.4273	16813	20201209_Lumos_Ritcher_sample148_17.raw		0	0	Proline Oxidation;Proline Oxidation;Proline Oxidation	P9:Proline Oxidation:0.00;P15:Proline Oxidation:33.81;P24:Proline Oxidation:14.02	AnsAna_Anas_undulata_B10K-D-IZW-61.COL1a1_Cyg-Gall.consensus:AnsAna_Aythya_americana_D2006016050.COL1a1_Cyg-Gall.consensus:AnsAna_Cereopsis_novaehollandiae_B10K-D-IZW-75.COL1a1_Cyg-Gall.consensus:AnsAna_Branta_leucopsis_DBGNRM65.COL1a1_Cyg-Gall.consensus:AnsAna_Aythya_marila_GCA_029042245.1.COL1a1_Cyg-Gall.consensus:AnsAna_Tadorna_tadorna_DBGNRM58.COL1a1_Cyg-Gall.consensus:AnsAna_Anser_cygnoides_…	DB Search
GLTGPIGPP(+15.99)GPAGAP(+15.99)GDKGEAGPP(+15.99)GPA	94.64	2339.14	27	-0.5	1170.58	2	30.9905	18445	20201209_Lumos_Ritcher_sample148_17.raw	271000	1	1	Proline Oxidation;Proline Oxidation;Proline Oxidation	P9:Proline Oxidation:17.01;P15:Proline Oxidation:32.94;P24:Proline Oxidation:0.00	AnsAna_Anas_undulata_B10K-D-IZW-61.COL1a1_Cyg-Gall.consensus:AnsAna_Aythya_americana_D2006016050.COL1a1_Cyg-Gall.consensus:AnsAna_Cereopsis_novaehollandiae_B10K-D-IZW-75.COL1a1_Cyg-Gall.consensus:AnsAna_Branta_leucopsis_DBGNRM65.COL1a1_Cyg-Gall.consensus:AnsAna_Aythya_marila_GCA_029042245.1.COL1a1_Cyg-Gall.consensus:AnsAna_Tadorna_tadorna_DBGNRM58.COL1a1_Cyg-Gall.consensus:AnsAna_Anser_cygnoides_…	DB Search
GLTGPIGPP(+15.99)GPAGAP(+15.99)GDKGEAGPP(+15.99)GPAGPTG	69.34	2651.28	31	-1	884.767	3	31.5207	18971	20201209_Lumos_Ritcher_sample148_17.raw	866000	1	1	Proline Oxidation;Proline Oxidation;Proline Oxidation	P9:Proline Oxidation:0.00;P15:Proline Oxidation:13.99;P24:Proline Oxidation:14.02	AnsAna_Anas_undulata_B10K-D-IZW-61.COL1a1_Cyg-Gall.consensus:AnsAna_Aythya_americana_D2006016050.COL1a1_Cyg-Gall.consensus:AnsAna_Cereopsis_novaehollandiae_B10K-D-IZW-75.COL1a1_Cyg-Gall.consensus:AnsAna_Branta_leucopsis_DBGNRM65.COL1a1_Cyg-Gall.consensus:AnsAna_Aythya_marila_GCA_029042245.1.COL1a1_Cyg-Gall.consensus:AnsAna_Tadorna_tadorna_DBGNRM58.COL1a1_Cyg-Gall.consensus:AnsAna_Anser_cygnoides_…	DB Search
GLTGPIGPP(+15.99)GPAGAP(+15.99)GDKGEAGPP(+15.99)GPAGPTGAR	94.29	2878.42	33	0.1	960.481	3	79.0848	49171	20201209_Lumos_Ritcher_sample148_17.raw	1090000000	4	4	Proline Oxidation;Proline Oxidation;Proline Oxidation	P9:Proline Oxidation:12.28;P15:Proline Oxidation:6.65;P24:Proline Oxidation:12.28	AnsAna_Anas_undulata_B10K-D-IZW-61.COL1a1_Cyg-Gall.consensus:AnsAna_Aythya_americana_D2006016050.COL1a1_Cyg-Gall.consensus:AnsAna_Cereopsis_novaehollandiae_B10K-D-IZW-75.COL1a1_Cyg-Gall.consensus:AnsAna_Branta_leucopsis_DBGNRM65.COL1a1_Cyg-Gall.consensus:AnsAna_Aythya_marila_GCA_029042245.1.COL1a1_Cyg-Gall.consensus:AnsAna_Tadorna_tadorna_DBGNRM58.COL1a1_Cyg-Gall.consensus:AnsAna_Anser_cygnoides_…	DB Search
GLTGPIGPP(+15.99)GPAGAP(+15.99)GDKGEAGPPGP(+15.99)A	93.67	2339.14	27	-0.5	1170.58	2	30.9905	18390	20201209_Lumos_Ritcher_sample148_17.raw	271000	1	1	Proline Oxidation;Proline Oxidation;Proline Oxidation	P9:Proline Oxidation:11.06;P15:Proline Oxidation:20.17;P26:Proline Oxidation:0.00	AnsAna_Anas_undulata_B10K-D-IZW-61.COL1a1_Cyg-Gall.consensus:AnsAna_Aythya_americana_D2006016050.COL1a1_Cyg-Gall.consensus:AnsAna_Cereopsis_novaehollandiae_B10K-D-IZW-75.COL1a1_Cyg-Gall.consensus:AnsAna_Branta_leucopsis_DBGNRM65.COL1a1_Cyg-Gall.consensus:AnsAna_Aythya_marila_GCA_029042245.1.COL1a1_Cyg-Gall.consensus:AnsAna_Tadorna_tadorna_DBGNRM58.COL1a1_Cyg-Gall.consensus:AnsAna_Anser_cygnoides_…	DB Search
GLTGPIGPP(+15.99)GPAGAP(+15.99)GDKGEAGPPGP(+15.99)AGPTGAR	63.85	2878.42	33	-3.6	960.477	3	30.1006	17513	20201209_Lumos_Ritcher_sample148_17.raw		0	0	Proline Oxidation;Proline Oxidation;Proline Oxidation	P9:Proline Oxidation:0.00;P15:Proline Oxidation:4.73;P26:Proline Oxidation:7.32	AnsAna_Anas_undulata_B10K-D-IZW-61.COL1a1_Cyg-Gall.consensus:AnsAna_Aythya_americana_D2006016050.COL1a1_Cyg-Gall.consensus:AnsAna_Cereopsis_novaehollandiae_B10K-D-IZW-75.COL1a1_Cyg-Gall.consensus:AnsAna_Branta_leucopsis_DBGNRM65.COL1a1_Cyg-Gall.consensus:AnsAna_Aythya_marila_GCA_029042245.1.COL1a1_Cyg-Gall.consensus:AnsAna_Tadorna_tadorna_DBGNRM58.COL1a1_Cyg-Gall.consensus:AnsAna_Anser_cygnoides_…	DB Search
GLTGPIGPP(+15.99)GPAGAPGDK	91.47	1573.81	18	-0.4	787.912	2	29.6745	16968	20201209_Lumos_Ritcher_sample148_17.raw	1140000	1	1	Proline Oxidation	P9:Proline Oxidation:12.28	AnsAna_Anas_undulata_B10K-D-IZW-61.COL1a1_Cyg-Gall.consensus:AnsAna_Aythya_americana_D2006016050.COL1a1_Cyg-Gall.consensus:AnsAna_Cereopsis_novaehollandiae_B10K-D-IZW-75.COL1a1_Cyg-Gall.consensus:AnsAna_Branta_leucopsis_DBGNRM65.COL1a1_Cyg-Gall.consensus:AnsAna_Aythya_marila_GCA_029042245.1.COL1a1_Cyg-Gall.consensus:AnsAna_Tadorna_tadorna_DBGNRM58.COL1a1_Cyg-Gall.consensus:AnsAna_Anser_cygnoides_…	DB Search
GLTGPIGPP(+15.99)GPAGAPGDKGEAGPP(+15.99)GPAGPTGAR	98.09	2862.43	33	1.1	955.15	3	30.0342	17443	20201209_Lumos_Ritcher_sample148_17.raw	7250000	2	2	Proline Oxidation;Proline Oxidation	P9:Proline Oxidation:12.28;P24:Proline Oxidation:12.28	AnsAna_Anas_undulata_B10K-D-IZW-61.COL1a1_Cyg-Gall.consensus:AnsAna_Aythya_americana_D2006016050.COL1a1_Cyg-Gall.consensus:AnsAna_Cereopsis_novaehollandiae_B10K-D-IZW-75.COL1a1_Cyg-Gall.consensus:AnsAna_Branta_leucopsis_DBGNRM65.COL1a1_Cyg-Gall.consensus:AnsAna_Aythya_marila_GCA_029042245.1.COL1a1_Cyg-Gall.consensus:AnsAna_Tadorna_tadorna_DBGNRM58.COL1a1_Cyg-Gall.consensus:AnsAna_Anser_cygnoides_…	DB Search
GLTGPIGPP(+15.99)GPAGC(sub A)PGDKGEAGPP(+15.99)GPAGPTGAR	45.78	2894.4	33	6.4	1448.22	2	28.7066	15964	20201209_Lumos_Ritcher_sample148_17.raw	703000000	3	3	Proline Oxidation;Ala->Cys substitution;Proline Oxidation	P9:Proline Oxidation:27.96;P24:Proline Oxidation:11.06	AnsAna_Spatula_discors_GCA_032165275.1.COL1a1_Cyg-Gall.consensus:AnsAna_Mareca_sibilatrix_GCA_034783215.1.COL1a1_Cyg-Gall.consensus:AnsAna_Cereopsis_novaehollandiae_B10K-D-IZW-75.COL1a1_Cyg-Gall.consensus:AnsAna_Tachyeres_brachypterus_GCA_032357605.1.COL1a1_Cyg-Gall.consensus:AnsAna_Branta_leucopsis_DBGNRM65.COL1a1_Cyg-Gall.consensus:AnsAna_Aythya_marila_GCA_029042245.1.COL1a1_Cyg-Gall.consensus:…	SPIDER
GLTGPIGPP(+15.99)GPAGC(sub A)PGDKGEAGPPGPF(sub A)GPTGARGAPG	42.59	3236.57	37	5.2	810.153	4	26.5566	13913	20201209_Lumos_Ritcher_sample148_17.raw		0	0	Proline Oxidation;Ala->Cys substitution;Ala->Phe substitution	P9:Proline Oxidation:12.28	AnsAna_Spatula_discors_GCA_032165275.1.COL1a1_Cyg-Gall.consensus:AnsAna_Mareca_sibilatrix_GCA_034783215.1.COL1a1_Cyg-Gall.consensus:AnsAna_Cereopsis_novaehollandiae_B10K-D-IZW-75.COL1a1_Cyg-Gall.consensus:AnsAna_Tachyeres_brachypterus_GCA_032357605.1.COL1a1_Cyg-Gall.consensus:AnsAna_Branta_leucopsis_DBGNRM65.COL1a1_Cyg-Gall.consensus:AnsAna_Aythya_marila_GCA_029042245.1.COL1a1_Cyg-Gall.consensus:…	SPIDER
GLTGPM(sub I)GPPGPAGAP(+15.99)GDKGEAGPP(+15.99)GPAGPTGAR	42.08	2880.38	33	9.1	961.143	3	29.9086	17311	20201209_Lumos_Ritcher_sample148_17.raw		0	0	Ile->Met substitution;Proline Oxidation;Proline Oxidation	P15:Proline Oxidation:35.82;P24:Proline Oxidation:17.01	AnsAna_Spatula_discors_GCA_032165275.1.COL1a1_Cyg-Gall.consensus:AnsAna_Mareca_sibilatrix_GCA_034783215.1.COL1a1_Cyg-Gall.consensus:AnsAna_Cereopsis_novaehollandiae_B10K-D-IZW-75.COL1a1_Cyg-Gall.consensus:AnsAna_Tachyeres_brachypterus_GCA_032357605.1.COL1a1_Cyg-Gall.consensus:AnsAna_Branta_leucopsis_DBGNRM65.COL1a1_Cyg-Gall.consensus:AnsAna_Aythya_marila_GCA_029042245.1.COL1a1_Cyg-Gall.consensus:…	SPIDER
GLTGSP(+15.99)GSP(+15.99)GPDGK	62.53	1257.58	14	-0.1	629.799	2	14.3077	3371	20201209_Lumos_Ritcher_sample148_17.raw	1860000	1	1	Proline Oxidation;Proline Oxidation	P6:Proline Oxidation:119.54;P9:Proline Oxidation:45.01	AnsAna_Anas_undulata_B10K-D-IZW-61.COL1a1_Cyg-Gall.consensus:AnsAna_Aythya_americana_D2006016050.COL1a1_Cyg-Gall.consensus:AnsAna_Cereopsis_novaehollandiae_B10K-D-IZW-75.COL1a1_Cyg-Gall.consensus:AnsAna_Branta_leucopsis_DBGNRM65.COL1a1_Cyg-Gall.consensus:AnsAna_Aythya_marila_GCA_029042245.1.COL1a1_Cyg-Gall.consensus:AnsAna_Tadorna_tadorna_DBGNRM58.COL1a1_Cyg-Gall.consensus:AnsAna_Anser_cygnoides_…	DB Search
GLVGEP(+15.99)GP(+15.99)AGAKGESGNKGEP(+15.99)GAAGPP(+15.99)GPP(+15.99)GPSGEEGKR	42.72	3585.69	39	-0.7	897.43	4	19.2003	6541	20201209_Lumos_Ritcher_sample148_17.raw	3100000	1	1	Proline Oxidation;Proline Oxidation;Proline Oxidation;Proline Oxidation;Proline Oxidation	P6:Proline Oxidation:84.27;P8:Proline Oxidation:81.08;P21:Proline Oxidation:45.16;P27:Proline Oxidation:17.01;P30:Proline Oxidation:17.01	AnsAna_Alopochen_aegyptiaca_D1907004292.COL1a2_Anas.consensus:AnsAna_Oxyura_jamaicensis_GCA_011077185.1.COL1a2_Anas.consensus:AnsAna_Lophonetta_specularioides_GCA_032165235.1.COL1a2_Anas.consensus:AnsAna_Anser_brachyrhynchus_GCA_002592135.1.COL1a2_Anas.consensus:AnsAna_Mareca_falcata_D2006016302.COL1a2_Anas.consensus:AnsAna_Cygnus_olor_GCA_009769485.2.COL1a2_Anas.consensus:AnsAna_Anser_indicus_GC…	SPIDER
GLVGEP(+15.99)GPAGAK	91.54	1067.56	12	0.4	534.788	2	19.9867	7250	20201209_Lumos_Ritcher_sample148_17.raw	70700	1	1	Proline Oxidation	P6:Proline Oxidation:9.40	AnsAna_Spatula_platalea_D2007020414.COL1a2_Anas.consensus:AnsAna_Chloephaga_rubidiceps_D2104051194.COL1a2_Anas.consensus:AnsAna_Cygnus_atratus_GCA_013377495.2.COL1a2_Anas.consensus:AnsAna_Plectropterus_gambensis_B10K-D-WWT-22.COL1a2_Anas.consensus:AnsAna_Aythya_affinis_CL200153793_L02.COL1a2_Anas.consensus:AnsAna_Somateria_spectabilis_D2006016067.COL1a2_Anas.consensus:AnsAna_Dendrocygna_guttata_B…	DB Search
GN(+0.98)DGAP(+15.99)GAAGPP(+15.99)GPTGPAGP(+15.99)PGFP(+15.99)GAAGAK	44.26	2532.15	30	0.1	1267.08	2	28.6954	16410	20201209_Lumos_Ritcher_sample148_17.raw	41700000	1	1	Deamidation (NQ);Proline Oxidation;Proline Oxidation;Proline Oxidation;Proline Oxidation	N2:Deamidation (NQ):1000.00;P6:Proline Oxidation:76.42;P12:Proline Oxidation:26.02;P20:Proline Oxidation:0.00;P24:Proline Oxidation:34.94	AnsAna_Spatula_discors_GCA_032165275.1.COL1a1_Cyg-Gall.consensus:AnsAna_Mareca_sibilatrix_GCA_034783215.1.COL1a1_Cyg-Gall.consensus:AnsAna_Tachyeres_brachypterus_GCA_032357605.1.COL1a1_Cyg-Gall.consensus:AnsAna_Branta_leucopsis_DBGNRM65.COL1a1_Cyg-Gall.consensus:AnsAna_Aythya_marila_GCA_029042245.1.COL1a1_Cyg-Gall.consensus:AnsAna_Dendrocygna_bicolor_B10K-D-IZW-84.COL1a1_Cyg-Gall.consensus:AnsAna…	SPIDER
GN(+0.98)DGAPGS(sub A)AGPP(+15.99)GPTGPAGPP(+15.99)GFP(+15.99)GAAGAK	49.27	2532.15	30	1.1	1267.08	2	28.5409	15973	20201209_Lumos_Ritcher_sample148_17.raw	163000000	1	1	Deamidation (NQ);Ala->Ser substitution;Proline Oxidation;Proline Oxidation;Proline Oxidation	N2:Deamidation (NQ):1000.00;P12:Proline Oxidation:8.69;P21:Proline Oxidation:8.69;P24:Proline Oxidation:33.65	AnsAna_Spatula_discors_GCA_032165275.1.COL1a1_Cyg-Gall.consensus:AnsAna_Mareca_sibilatrix_GCA_034783215.1.COL1a1_Cyg-Gall.consensus:AnsAna_Tachyeres_brachypterus_GCA_032357605.1.COL1a1_Cyg-Gall.consensus:AnsAna_Cereopsis_novaehollandiae_B10K-D-IZW-75.COL1a1_Cyg-Gall.consensus:AnsAna_Branta_leucopsis_DBGNRM65.COL1a1_Cyg-Gall.consensus:AnsAna_Aythya_marila_GCA_029042245.1.COL1a1_Cyg-Gall.consensus:…	SPIDER
GN(+0.98)DGAPGS(sub A)AGPP(+15.99)GPTGPAGPP(+15.99)GFP(+15.99)GAAGS(sub A)K	43.36	2548.15	30	0.6	1275.08	2	28.3477	15719	20201209_Lumos_Ritcher_sample148_17.raw	31900000	1	1	Deamidation (NQ);Ala->Ser substitution;Proline Oxidation;Proline Oxidation;Proline Oxidation; more	N2:Deamidation (NQ):1000.00;P12:Proline Oxidation:20.92;P21:Proline Oxidation:8.14;P24:Proline Oxidation:35.82	AnsAna_Spatula_discors_GCA_032165275.1.COL1a1_Cyg-Gall.consensus:AnsAna_Mareca_sibilatrix_GCA_034783215.1.COL1a1_Cyg-Gall.consensus:AnsAna_Tachyeres_brachypterus_GCA_032357605.1.COL1a1_Cyg-Gall.consensus:AnsAna_Cereopsis_novaehollandiae_B10K-D-IZW-75.COL1a1_Cyg-Gall.consensus:AnsAna_Branta_leucopsis_DBGNRM65.COL1a1_Cyg-Gall.consensus:AnsAna_Aythya_marila_GCA_029042245.1.COL1a1_Cyg-Gall.consensus:…	SPIDER
GN(+0.98)VGAAGGP(+15.99)GPAGPGGIP(+15.99)GER	91.63	1776.84	21	-1.6	889.425	2	23.953	11336	20201209_Lumos_Ritcher_sample148_17.raw	95000	1	1	Deamidation (NQ);Proline Oxidation;Proline Oxidation	N2:Deamidation (NQ):1000.00;P9:Proline Oxidation:20.41;P18:Proline Oxidation:5.55	AnsAna_Spatula_platalea_D2007020414.COL1a2_Anas.consensus:AnsAna_Chloephaga_rubidiceps_D2104051194.COL1a2_Anas.consensus:AnsAna_Cygnus_atratus_GCA_013377495.2.COL1a2_Anas.consensus:AnsAna_Plectropterus_gambensis_B10K-D-WWT-22.COL1a2_Anas.consensus:AnsAna_Aythya_affinis_CL200153793_L02.COL1a2_Anas.consensus:AnsAna_Somateria_spectabilis_D2006016067.COL1a2_Anas.consensus:AnsAna_Dendrocygna_guttata_B…	DB Search
GN(+0.98)VGLAGPR	54.66	840.445	9	0	421.23	2	20.8434	7928	20201209_Lumos_Ritcher_sample148_17.raw	181000	1	1	Deamidation (NQ)	N2:Deamidation (NQ):1000.00	AnsAna_Spatula_platalea_D2007020414.COL1a2_Anas.consensus:AnsAna_Chloephaga_rubidiceps_D2104051194.COL1a2_Anas.consensus:AnsAna_Cygnus_atratus_GCA_013377495.2.COL1a2_Anas.consensus:AnsAna_Plectropterus_gambensis_B10K-D-WWT-22.COL1a2_Anas.consensus:AnsAna_Aythya_affinis_CL200153793_L02.COL1a2_Anas.consensus:AnsAna_Somateria_spectabilis_D2006016067.COL1a2_Anas.consensus:AnsAna_Dendrocygna_guttata_B…	DB Search
GNDGAP(+15.99)GAAGPP(+15.99)GPTGPAGP(+15.99)PGFP(+15.99)GAAGAK	49.9	2531.17	30	-1.8	1266.59	2	27.8367	15278	20201209_Lumos_Ritcher_sample148_17.raw		0	0	Proline Oxidation;Proline Oxidation;Proline Oxidation;Proline Oxidation	P6:Proline Oxidation:55.60;P12:Proline Oxidation:18.53;P20:Proline Oxidation:0.00;P24:Proline Oxidation:14.84	AnsAna_Spatula_discors_GCA_032165275.1.COL1a1_Cyg-Gall.consensus:AnsAna_Mareca_sibilatrix_GCA_034783215.1.COL1a1_Cyg-Gall.consensus:AnsAna_Tachyeres_brachypterus_GCA_032357605.1.COL1a1_Cyg-Gall.consensus:AnsAna_Cereopsis_novaehollandiae_B10K-D-IZW-75.COL1a1_Cyg-Gall.consensus:AnsAna_Branta_leucopsis_DBGNRM65.COL1a1_Cyg-Gall.consensus:AnsAna_Aythya_marila_GCA_029042245.1.COL1a1_Cyg-Gall.consensus:…	SPIDER
GNDGAP(+15.99)GAAGPP(+15.99)GPTGPAGPP(+15.99)GFP(+15.99)GAAGAK	53.06	2531.17	30	0.4	844.73	3	28.1266	15606	20201209_Lumos_Ritcher_sample148_17.raw	159000000	1	1	Proline Oxidation;Proline Oxidation;Proline Oxidation;Proline Oxidation	P6:Proline Oxidation:38.33;P12:Proline Oxidation:7.21;P21:Proline Oxidation:7.21;P24:Proline Oxidation:22.99	AnsAna_Spatula_discors_GCA_032165275.1.COL1a1_Cyg-Gall.consensus:AnsAna_Mareca_sibilatrix_GCA_034783215.1.COL1a1_Cyg-Gall.consensus:AnsAna_Tachyeres_brachypterus_GCA_032357605.1.COL1a1_Cyg-Gall.consensus:AnsAna_Cereopsis_novaehollandiae_B10K-D-IZW-75.COL1a1_Cyg-Gall.consensus:AnsAna_Branta_leucopsis_DBGNRM65.COL1a1_Cyg-Gall.consensus:AnsAna_Aythya_marila_GCA_029042245.1.COL1a1_Cyg-Gall.consensus:…	SPIDER
GNDGAP(+15.99)GAAGPP(+15.99)GPTGPAGPP(+15.99)GFP(+15.99)GAAGS(sub A)KGETGPQ(+0.98)GAR	44.7	3401.55	39	-1.4	851.394	4	27.2144	14916	20201209_Lumos_Ritcher_sample148_17.raw	42500000	1	1	Proline Oxidation;Proline Oxidation;Proline Oxidation;Proline Oxidation;Ala->Ser substitution; more	P6:Proline Oxidation:12.67;P12:Proline Oxidation:9.34;P21:Proline Oxidation:9.34;P24:Proline Oxidation:42.89;Q36:Deamidation (NQ):125.55	AnsAna_Spatula_discors_GCA_032165275.1.COL1a1_Cyg-Gall.consensus:AnsAna_Mareca_sibilatrix_GCA_034783215.1.COL1a1_Cyg-Gall.consensus:AnsAna_Tachyeres_brachypterus_GCA_032357605.1.COL1a1_Cyg-Gall.consensus:AnsAna_Cereopsis_novaehollandiae_B10K-D-IZW-75.COL1a1_Cyg-Gall.consensus:AnsAna_Branta_leucopsis_DBGNRM65.COL1a1_Cyg-Gall.consensus:AnsAna_Aythya_marila_GCA_029042245.1.COL1a1_Cyg-Gall.consensus:…	SPIDER
GNDGAPGS(sub A)AGPP(+15.99)GPTGPAGPP(+15.99)GFP(+15.99)GAAGAK	42.58	2531.17	30	0.4	1266.59	2	28.3297	15826	20201209_Lumos_Ritcher_sample148_17.raw	70900000	1	1	Ala->Ser substitution;Proline Oxidation;Proline Oxidation;Proline Oxidation	P12:Proline Oxidation:23.10;P21:Proline Oxidation:0.00;P24:Proline Oxidation:31.27	AnsAna_Spatula_discors_GCA_032165275.1.COL1a1_Cyg-Gall.consensus:AnsAna_Mareca_sibilatrix_GCA_034783215.1.COL1a1_Cyg-Gall.consensus:AnsAna_Tachyeres_brachypterus_GCA_032357605.1.COL1a1_Cyg-Gall.consensus:AnsAna_Branta_leucopsis_DBGNRM65.COL1a1_Cyg-Gall.consensus:AnsAna_Aythya_marila_GCA_029042245.1.COL1a1_Cyg-Gall.consensus:AnsAna_Dendrocygna_bicolor_B10K-D-IZW-84.COL1a1_Cyg-Gall.consensus:AnsAna…	SPIDER
GNKGEPGNVGAAGGP(+15.99)GPAGPGGIP(+15.99)GER	42.17	2358.13	27	-6.7	1180.06	2	30.601	18037	20201209_Lumos_Ritcher_sample148_17.raw		0	0	Proline Oxidation;Proline Oxidation	P15:Proline Oxidation:7.81;P24:Proline Oxidation:11.12	AnsAna_Spatula_platalea_D2007020414.COL1a2_Anas.consensus:AnsAna_Chloephaga_rubidiceps_D2104051194.COL1a2_Anas.consensus:AnsAna_Cygnus_atratus_GCA_013377495.2.COL1a2_Anas.consensus:AnsAna_Plectropterus_gambensis_B10K-D-WWT-22.COL1a2_Anas.consensus:AnsAna_Aythya_affinis_CL200153793_L02.COL1a2_Anas.consensus:AnsAna_Somateria_spectabilis_D2006016067.COL1a2_Anas.consensus:AnsAna_Dendrocygna_guttata_B…	DB Search
GNSGEP(+15.99)GAP(+15.99)GNK	94.36	1115.48	12	-0.1	558.749	2	8.7364	1833	20201209_Lumos_Ritcher_sample148_17.raw	5490	1	1	Proline Oxidation;Proline Oxidation	P6:Proline Oxidation:1000.00;P9:Proline Oxidation:1000.00	AnsAna_Anas_undulata_B10K-D-IZW-61.COL1a1_Cyg-Gall.consensus:AnsAna_Aythya_americana_D2006016050.COL1a1_Cyg-Gall.consensus:AnsAna_Cereopsis_novaehollandiae_B10K-D-IZW-75.COL1a1_Cyg-Gall.consensus:AnsAna_Branta_leucopsis_DBGNRM65.COL1a1_Cyg-Gall.consensus:AnsAna_Aythya_marila_GCA_029042245.1.COL1a1_Cyg-Gall.consensus:AnsAna_Tadorna_tadorna_DBGNRM58.COL1a1_Cyg-Gall.consensus:AnsAna_Anser_cygnoides_…	DB Search
GNVGLAGPR	94.75	839.461	9	0	420.738	2	19.8529	7108	20201209_Lumos_Ritcher_sample148_17.raw		0	0			AnsAna_Spatula_platalea_D2007020414.COL1a2_Anas.consensus:AnsAna_Chloephaga_rubidiceps_D2104051194.COL1a2_Anas.consensus:AnsAna_Cygnus_atratus_GCA_013377495.2.COL1a2_Anas.consensus:AnsAna_Plectropterus_gambensis_B10K-D-WWT-22.COL1a2_Anas.consensus:AnsAna_Aythya_affinis_CL200153793_L02.COL1a2_Anas.consensus:AnsAna_Somateria_spectabilis_D2006016067.COL1a2_Anas.consensus:AnsAna_Dendrocygna_guttata_B…	DB Search
GP(+15.99)AGPPGEAGKPGEQ(+0.98)GAPGDAGAP(+15.99)GPAGAR	82.56	2583.19	30	-1.3	862.071	3	22.7609	9864	20201209_Lumos_Ritcher_sample148_17.raw	310000	1	1	Proline Oxidation;Deamidation (NQ);Proline Oxidation	P2:Proline Oxidation:28.36;Q15:Deamidation (NQ):1000.00;P24:Proline Oxidation:0.00	AnsAna_Aix_sponsa_B10K-D-WWT-1.COL1a1_Cyg-Gall.consensus	DB Search
GP(+15.99)AGPPGEAGKPGEQGAPGDAGAP(+15.99)GPAGAR	86.14	2582.21	30	-6.3	861.739	3	22.6447	9864	20201209_Lumos_Ritcher_sample148_17.raw		0	0	Proline Oxidation;Proline Oxidation	P2:Proline Oxidation:28.36;P24:Proline Oxidation:0.00	AnsAna_Aix_sponsa_B10K-D-WWT-1.COL1a1_Cyg-Gall.consensus	DB Search
GP(+15.99)AGPQGPR	82.27	851.425	9	-0.3	426.72	2	16.7922	4411	20201209_Lumos_Ritcher_sample148_17.raw	77800	1	1	Proline Oxidation	P2:Proline Oxidation:38.16	AnsAna_Anas_undulata_B10K-D-IZW-61.COL1a1_Cyg-Gall.consensus:AnsAna_Aythya_americana_D2006016050.COL1a1_Cyg-Gall.consensus:AnsAna_Pteronetta_hartlaubii_D2102046034.COL1a1_Cyg-Gall.consensus:AnsAna_Cereopsis_novaehollandiae_B10K-D-IZW-75.COL1a1_Cyg-Gall.consensus:AnsAna_Branta_leucopsis_DBGNRM65.COL1a1_Cyg-Gall.consensus:AnsAna_Aythya_marila_GCA_029042245.1.COL1a1_Cyg-Gall.consensus:AnsAna_Tadorna…	DB Search
GP(+15.99)KGETGP(+15.99)TGAIGPIGASGPP(+15.99)GPAGAAGPAGPR	70.92	2824.41	33	-1.4	942.476	3	30.8492	18283	20201209_Lumos_Ritcher_sample148_17.raw	145000	1	1	Proline Oxidation;Proline Oxidation;Proline Oxidation	P2:Proline Oxidation:19.27;P8:Proline Oxidation:6.67;P21:Proline Oxidation:17.01	AnsAna_Lophodytes_cucullatus_B10K-D-WWT-15.COL1a2_Anas.consensus:AnsAna_Spatula_platalea_D2007020414.COL1a2_Anas.consensus:AnsAna_Spatula_smithii_GCA_035221675.1.COL1a2_Anas.consensus:AnsAna_Anas_gibberifrons_D2007020344.COL1a2_Anas.consensus:AnsAna_Aythya_baeri_GCA_026413565.1.COL1a2_Anas.consensus:AnsAna_Cyanochen_cyanoptera_B10K-D-WWT-10.COL1a2_Anas.consensus:AnsAna_Plectropterus_gambensis_B10…	DB Search
GP(+15.99)KGETGPTGAIGPIGASGP(+15.99)P(+15.99)GPAGAAGPAGPR	59.51	2824.41	33	0.2	942.478	3	30.3061	17737	20201209_Lumos_Ritcher_sample148_17.raw		0	0	Proline Oxidation;Proline Oxidation;Proline Oxidation	P2:Proline Oxidation:9.45;P20:Proline Oxidation:12.33;P21:Proline Oxidation:8.22	AnsAna_Lophodytes_cucullatus_B10K-D-WWT-15.COL1a2_Anas.consensus:AnsAna_Spatula_platalea_D2007020414.COL1a2_Anas.consensus:AnsAna_Spatula_smithii_GCA_035221675.1.COL1a2_Anas.consensus:AnsAna_Anas_gibberifrons_D2007020344.COL1a2_Anas.consensus:AnsAna_Aythya_baeri_GCA_026413565.1.COL1a2_Anas.consensus:AnsAna_Cyanochen_cyanoptera_B10K-D-WWT-10.COL1a2_Anas.consensus:AnsAna_Plectropterus_gambensis_B10…	DB Search
GP(+15.99)KGETGPTGAIGPIGASGPP(+15.99)GPAGAA	94.93	2273.13	27	-0.5	758.716	3	32.694	20286	20201209_Lumos_Ritcher_sample148_17.raw	644000	1	1	Proline Oxidation;Proline Oxidation	P2:Proline Oxidation:23.96;P21:Proline Oxidation:12.28	AnsAna_Lophodytes_cucullatus_B10K-D-WWT-15.COL1a2_Anas.consensus:AnsAna_Spatula_platalea_D2007020414.COL1a2_Anas.consensus:AnsAna_Spatula_smithii_GCA_035221675.1.COL1a2_Anas.consensus:AnsAna_Anas_gibberifrons_D2007020344.COL1a2_Anas.consensus:AnsAna_Aythya_baeri_GCA_026413565.1.COL1a2_Anas.consensus:AnsAna_Cyanochen_cyanoptera_B10K-D-WWT-10.COL1a2_Anas.consensus:AnsAna_Plectropterus_gambensis_B10…	DB Search
GP(+15.99)KGETGPTGAIGPIGASGPP(+15.99)GPAGAAGP(+15.99)AGPR	90.87	2824.41	33	-0.8	707.109	4	29.841	17238	20201209_Lumos_Ritcher_sample148_17.raw		0	0	Proline Oxidation;Proline Oxidation;Proline Oxidation	P2:Proline Oxidation:13.71;P21:Proline Oxidation:14.02;P29:Proline Oxidation:12.19	AnsAna_Lophodytes_cucullatus_B10K-D-WWT-15.COL1a2_Anas.consensus:AnsAna_Spatula_platalea_D2007020414.COL1a2_Anas.consensus:AnsAna_Spatula_smithii_GCA_035221675.1.COL1a2_Anas.consensus:AnsAna_Anas_gibberifrons_D2007020344.COL1a2_Anas.consensus:AnsAna_Aythya_baeri_GCA_026413565.1.COL1a2_Anas.consensus:AnsAna_Cyanochen_cyanoptera_B10K-D-WWT-10.COL1a2_Anas.consensus:AnsAna_Plectropterus_gambensis_B10…	DB Search
GP(+15.99)KGETGPTGAIGPIGASGPP(+15.99)GPAGAAGPAGPR	94.14	2808.42	33	-0.8	937.145	3	31.2797	18746	20201209_Lumos_Ritcher_sample148_17.raw	94600000	3	3	Proline Oxidation;Proline Oxidation	P2:Proline Oxidation:19.69;P21:Proline Oxidation:13.45	AnsAna_Lophodytes_cucullatus_B10K-D-WWT-15.COL1a2_Anas.consensus:AnsAna_Spatula_platalea_D2007020414.COL1a2_Anas.consensus:AnsAna_Spatula_smithii_GCA_035221675.1.COL1a2_Anas.consensus:AnsAna_Anas_gibberifrons_D2007020344.COL1a2_Anas.consensus:AnsAna_Aythya_baeri_GCA_026413565.1.COL1a2_Anas.consensus:AnsAna_Cyanochen_cyanoptera_B10K-D-WWT-10.COL1a2_Anas.consensus:AnsAna_Plectropterus_gambensis_B10…	DB Search
GP(+15.99)KGQ(sub E)TGPTGAIGPIGASGP(+15.99)PGPAGAAGPAGPR	45.84	2807.43	33	-7.7	1404.71	2	30.8682	18297	20201209_Lumos_Ritcher_sample148_17.raw		0	0	Proline Oxidation;Glu->Gln substitution;Proline Oxidation	P2:Proline Oxidation:21.46;P20:Proline Oxidation:0.00	AnsAna_Alopochen_aegyptiaca_D1907004292.COL1a2_Anas.consensus:AnsAna_Mergellus_albellus_B10K-D-WWT-19.COL1a2_Anas.consensus:AnsAna_Anas_gibberifrons_D2007020344.COL1a2_Anas.consensus:AnsAna_Oxyura_jamaicensis_GCA_011077185.1.COL1a2_Anas.consensus:AnsAna_Lophonetta_specularioides_GCA_032165235.1.COL1a2_Anas.consensus:AnsAna_Mareca_falcata_D2006016302.COL1a2_Anas.consensus:AnsAna_Aythya_americana_D…	SPIDER
GP(+15.99)MGPP(+15.99)GLAGPP(+15.99)GEAGR	81.09	1564.73	17	1.1	783.373	2	23.6383	10934	20201209_Lumos_Ritcher_sample148_17.raw		0	0	Proline Oxidation;Proline Oxidation;Proline Oxidation	P2:Proline Oxidation:57.13;P6:Proline Oxidation:8.69;P12:Proline Oxidation:8.69	AnsAna_Anas_undulata_B10K-D-IZW-61.COL1a1_Cyg-Gall.consensus:AnsAna_Aythya_americana_D2006016050.COL1a1_Cyg-Gall.consensus:AnsAna_Pteronetta_hartlaubii_D2102046034.COL1a1_Cyg-Gall.consensus:AnsAna_Cereopsis_novaehollandiae_B10K-D-IZW-75.COL1a1_Cyg-Gall.consensus:AnsAna_Branta_leucopsis_DBGNRM65.COL1a1_Cyg-Gall.consensus:AnsAna_Aythya_marila_GCA_029042245.1.COL1a1_Cyg-Gall.consensus:AnsAna_Tadorna…	DB Search
GP(+15.99)NACCFCWCCCCSCSCLTVR	48.81	2276.76	21	-6.9	1139.38	2	31.809	19333	20201209_Lumos_Ritcher_sample148_17.raw		0	0	Proline Oxidation	P2:Proline Oxidation:1000.00	sp|Q9PWA1|RGS20_CHICK	DB Search
GP(+15.99)P(+15.99)GEAGKPGEQGVPGDAGAP(+15.99)GPAGAR	90.72	2401.13	27	2.2	801.384	3	19.6847	6950	20201209_Lumos_Ritcher_sample148_17.raw		0	0	Proline Oxidation;Proline Oxidation;Proline Oxidation	P2:Proline Oxidation:19.99;P3:Proline Oxidation:9.69;P21:Proline Oxidation:0.00	AnsAna_Anas_undulata_B10K-D-IZW-61.COL1a1_Cyg-Gall.consensus:AnsAna_Aythya_americana_D2006016050.COL1a1_Cyg-Gall.consensus:AnsAna_Cereopsis_novaehollandiae_B10K-D-IZW-75.COL1a1_Cyg-Gall.consensus:AnsAna_Branta_leucopsis_DBGNRM65.COL1a1_Cyg-Gall.consensus:AnsAna_Aythya_marila_GCA_029042245.1.COL1a1_Cyg-Gall.consensus:AnsAna_Tadorna_tadorna_DBGNRM58.COL1a1_Cyg-Gall.consensus:AnsAna_Anser_cygnoides_…	DB Search
GP(+15.99)P(+15.99)GESGAVGPAGPIGSR	94.43	1593.77	18	0	797.895	2	24.123	11507	20201209_Lumos_Ritcher_sample148_17.raw	2640000	1	1	Proline Oxidation;Proline Oxidation	P2:Proline Oxidation:54.28;P3:Proline Oxidation:64.00	AnsAna_Spatula_platalea_D2007020414.COL1a2_Anas.consensus:AnsAna_Chloephaga_rubidiceps_D2104051194.COL1a2_Anas.consensus:AnsAna_Cygnus_atratus_GCA_013377495.2.COL1a2_Anas.consensus:AnsAna_Plectropterus_gambensis_B10K-D-WWT-22.COL1a2_Anas.consensus:AnsAna_Aythya_affinis_CL200153793_L02.COL1a2_Anas.consensus:AnsAna_Somateria_spectabilis_D2006016067.COL1a2_Anas.consensus:AnsAna_Dendrocygna_guttata_B…	DB Search
GP(+15.99)PGASGPP(+15.99)GPP(+15.99)GF	89.98	1238.56	14	-1.1	620.285	2	31.1753	18635	20201209_Lumos_Ritcher_sample148_17.raw		0	0	Proline Oxidation;Proline Oxidation;Proline Oxidation	P2:Proline Oxidation:14.02;P9:Proline Oxidation:9.34;P12:Proline Oxidation:15.10	AnsAna_Spatula_platalea_D2007020414.COL1a2_Anas.consensus:AnsAna_Chloephaga_rubidiceps_D2104051194.COL1a2_Anas.consensus:AnsAna_Cygnus_atratus_GCA_013377495.2.COL1a2_Anas.consensus:AnsAna_Plectropterus_gambensis_B10K-D-WWT-22.COL1a2_Anas.consensus:AnsAna_Aythya_affinis_CL200153793_L02.COL1a2_Anas.consensus:AnsAna_Somateria_spectabilis_D2006016067.COL1a2_Anas.consensus:AnsAna_Dendrocygna_guttata_B…	DB Search
GP(+15.99)PGASGPPGP(+15.99)PGFQGVPGEP(+15.99)GEPGQTG	78.78	2529.14	28	2.8	844.057	3	26.9388	14328	20201209_Lumos_Ritcher_sample148_17.raw		0	0	Proline Oxidation;Proline Oxidation;Proline Oxidation	P2:Proline Oxidation:17.01;P11:Proline Oxidation:14.04;P21:Proline Oxidation:0.00	AnsAna_Spatula_platalea_D2007020414.COL1a2_Anas.consensus:AnsAna_Chloephaga_rubidiceps_D2104051194.COL1a2_Anas.consensus:AnsAna_Cygnus_atratus_GCA_013377495.2.COL1a2_Anas.consensus:AnsAna_Plectropterus_gambensis_B10K-D-WWT-22.COL1a2_Anas.consensus:AnsAna_Aythya_affinis_CL200153793_L02.COL1a2_Anas.consensus:AnsAna_Somateria_spectabilis_D2006016067.COL1a2_Anas.consensus:AnsAna_Dendrocygna_guttata_B…	DB Search
GP(+15.99)PGEAGKPGEQ(+0.98)GAPGDAGAP(+15.99)GPAGAR	85.44	2358.08	27	-2.1	787.033	3	21.2895	8373	20201209_Lumos_Ritcher_sample148_17.raw	206000	1	1	Proline Oxidation;Deamidation (NQ);Proline Oxidation	P2:Proline Oxidation:17.01;Q12:Deamidation (NQ):1000.00;P21:Proline Oxidation:0.00	AnsAna_Aix_sponsa_B10K-D-WWT-1.COL1a1_Cyg-Gall.consensus	DB Search
GP(+15.99)PGESGAVGPAGPIGSR	92.06	1577.78	18	0	526.934	3	25.1944	12492	20201209_Lumos_Ritcher_sample148_17.raw	62900000	1	1	Proline Oxidation	P2:Proline Oxidation:0.00	AnsAna_Spatula_platalea_D2007020414.COL1a2_Anas.consensus:AnsAna_Chloephaga_rubidiceps_D2104051194.COL1a2_Anas.consensus:AnsAna_Cygnus_atratus_GCA_013377495.2.COL1a2_Anas.consensus:AnsAna_Plectropterus_gambensis_B10K-D-WWT-22.COL1a2_Anas.consensus:AnsAna_Aythya_affinis_CL200153793_L02.COL1a2_Anas.consensus:AnsAna_Somateria_spectabilis_D2006016067.COL1a2_Anas.consensus:AnsAna_Dendrocygna_guttata_B…	DB Search
GP(+15.99)PGFPGAPGAKGEIGPAGN(+0.98)VGPTGPAGPR	77.11	2653.32	30	6.1	885.454	3	32.0138	19547	20201209_Lumos_Ritcher_sample148_17.raw		0	0	Proline Oxidation;Deamidation (NQ)	P2:Proline Oxidation:11.59;N20:Deamidation (NQ):1000.00	AnsAna_Spatula_platalea_D2007020414.COL1a2_Anas.consensus:AnsAna_Chloephaga_rubidiceps_D2104051194.COL1a2_Anas.consensus:AnsAna_Plectropterus_gambensis_B10K-D-WWT-22.COL1a2_Anas.consensus:AnsAna_Aythya_affinis_CL200153793_L02.COL1a2_Anas.consensus:AnsAna_Somateria_spectabilis_D2006016067.COL1a2_Anas.consensus:AnsAna_Neochen_jubata_B10K-D-WWT-20.COL1a2_Anas.consensus:AnsAna_Anas_fulvigula_D2005012…	DB Search
GP(+15.99)PGP(+15.99)MGP(+15.99)PGLAGPPGEAGR	93.97	1815.86	20	-1.9	606.292	3	29.9102	17313	20201209_Lumos_Ritcher_sample148_17.raw		0	0	Proline Oxidation;Proline Oxidation;Proline Oxidation	P2:Proline Oxidation:17.01;P5:Proline Oxidation:14.19;P8:Proline Oxidation:27.96	AnsAna_Anas_undulata_B10K-D-IZW-61.COL1a1_Cyg-Gall.consensus:AnsAna_Aythya_americana_D2006016050.COL1a1_Cyg-Gall.consensus:AnsAna_Pteronetta_hartlaubii_D2102046034.COL1a1_Cyg-Gall.consensus:AnsAna_Cereopsis_novaehollandiae_B10K-D-IZW-75.COL1a1_Cyg-Gall.consensus:AnsAna_Branta_leucopsis_DBGNRM65.COL1a1_Cyg-Gall.consensus:AnsAna_Aythya_marila_GCA_029042245.1.COL1a1_Cyg-Gall.consensus:AnsAna_Tadorna…	DB Search
GP(+15.99)PGP(+15.99)MGPP(+15.99)GLA	65.19	1094.51	12	-1.6	548.26	2	27.0333	14452	20201209_Lumos_Ritcher_sample148_17.raw	344000	1	1	Proline Oxidation;Proline Oxidation;Proline Oxidation	P2:Proline Oxidation:17.01;P5:Proline Oxidation:20.41;P9:Proline Oxidation:27.96	AnsAna_Anas_undulata_B10K-D-IZW-61.COL1a1_Cyg-Gall.consensus:AnsAna_Aythya_americana_D2006016050.COL1a1_Cyg-Gall.consensus:AnsAna_Pteronetta_hartlaubii_D2102046034.COL1a1_Cyg-Gall.consensus:AnsAna_Cereopsis_novaehollandiae_B10K-D-IZW-75.COL1a1_Cyg-Gall.consensus:AnsAna_Branta_leucopsis_DBGNRM65.COL1a1_Cyg-Gall.consensus:AnsAna_Aythya_marila_GCA_029042245.1.COL1a1_Cyg-Gall.consensus:AnsAna_Tadorna…	DB Search
GP(+15.99)PGP(+15.99)MGPPGLAGPP(+15.99)GE	62.67	1531.7	17	0.3	766.856	2	30.1787	17597	20201209_Lumos_Ritcher_sample148_17.raw		0	0	Proline Oxidation;Proline Oxidation;Proline Oxidation	P2:Proline Oxidation:17.01;P5:Proline Oxidation:26.31;P15:Proline Oxidation:17.01	AnsAna_Anas_undulata_B10K-D-IZW-61.COL1a1_Cyg-Gall.consensus:AnsAna_Aythya_americana_D2006016050.COL1a1_Cyg-Gall.consensus:AnsAna_Pteronetta_hartlaubii_D2102046034.COL1a1_Cyg-Gall.consensus:AnsAna_Cereopsis_novaehollandiae_B10K-D-IZW-75.COL1a1_Cyg-Gall.consensus:AnsAna_Branta_leucopsis_DBGNRM65.COL1a1_Cyg-Gall.consensus:AnsAna_Aythya_marila_GCA_029042245.1.COL1a1_Cyg-Gall.consensus:AnsAna_Tadorna…	DB Search
GP(+15.99)PGP(+15.99)MGPPGLAGPP(+15.99)GEA	88.25	1602.73	18	-0.2	802.374	2	30.4191	17874	20201209_Lumos_Ritcher_sample148_17.raw	256000	1	1	Proline Oxidation;Proline Oxidation;Proline Oxidation	P2:Proline Oxidation:17.01;P5:Proline Oxidation:20.41;P15:Proline Oxidation:11.06	AnsAna_Anas_undulata_B10K-D-IZW-61.COL1a1_Cyg-Gall.consensus:AnsAna_Aythya_americana_D2006016050.COL1a1_Cyg-Gall.consensus:AnsAna_Pteronetta_hartlaubii_D2102046034.COL1a1_Cyg-Gall.consensus:AnsAna_Cereopsis_novaehollandiae_B10K-D-IZW-75.COL1a1_Cyg-Gall.consensus:AnsAna_Branta_leucopsis_DBGNRM65.COL1a1_Cyg-Gall.consensus:AnsAna_Aythya_marila_GCA_029042245.1.COL1a1_Cyg-Gall.consensus:AnsAna_Tadorna…	DB Search
GP(+15.99)PGP(+15.99)MGPPGLAGPP(+15.99)GEAG	69.93	1659.76	19	-1.4	830.884	2	29.8353	17103	20201209_Lumos_Ritcher_sample148_17.raw	630000	1	1	Proline Oxidation;Proline Oxidation;Proline Oxidation	P2:Proline Oxidation:17.01;P5:Proline Oxidation:12.63;P15:Proline Oxidation:8.14	AnsAna_Anas_undulata_B10K-D-IZW-61.COL1a1_Cyg-Gall.consensus:AnsAna_Aythya_americana_D2006016050.COL1a1_Cyg-Gall.consensus:AnsAna_Pteronetta_hartlaubii_D2102046034.COL1a1_Cyg-Gall.consensus:AnsAna_Cereopsis_novaehollandiae_B10K-D-IZW-75.COL1a1_Cyg-Gall.consensus:AnsAna_Branta_leucopsis_DBGNRM65.COL1a1_Cyg-Gall.consensus:AnsAna_Aythya_marila_GCA_029042245.1.COL1a1_Cyg-Gall.consensus:AnsAna_Tadorna…	DB Search
GP(+15.99)PGP(+15.99)MGPPGLAGPP(+15.99)GEAGR	94.39	1815.86	20	0	606.293	3	27.9063	15358	20201209_Lumos_Ritcher_sample148_17.raw	33500	1	1	Proline Oxidation;Proline Oxidation;Proline Oxidation	P2:Proline Oxidation:17.01;P5:Proline Oxidation:16.66;P15:Proline Oxidation:0.00	AnsAna_Anas_undulata_B10K-D-IZW-61.COL1a1_Cyg-Gall.consensus:AnsAna_Aythya_americana_D2006016050.COL1a1_Cyg-Gall.consensus:AnsAna_Pteronetta_hartlaubii_D2102046034.COL1a1_Cyg-Gall.consensus:AnsAna_Cereopsis_novaehollandiae_B10K-D-IZW-75.COL1a1_Cyg-Gall.consensus:AnsAna_Branta_leucopsis_DBGNRM65.COL1a1_Cyg-Gall.consensus:AnsAna_Aythya_marila_GCA_029042245.1.COL1a1_Cyg-Gall.consensus:AnsAna_Tadorna…	DB Search
GP(+15.99)PGP(+15.99)MGPPGLAGPP(+15.99)GEAGRE	74.74	1944.9	21	-6.9	649.303	3	27.2332	14636	20201209_Lumos_Ritcher_sample148_17.raw		0	0	Proline Oxidation;Proline Oxidation;Proline Oxidation	P2:Proline Oxidation:17.01;P5:Proline Oxidation:9.42;P15:Proline Oxidation:17.01	AnsAna_Anas_undulata_B10K-D-IZW-61.COL1a1_Cyg-Gall.consensus:AnsAna_Aythya_americana_D2006016050.COL1a1_Cyg-Gall.consensus:AnsAna_Pteronetta_hartlaubii_D2102046034.COL1a1_Cyg-Gall.consensus:AnsAna_Cereopsis_novaehollandiae_B10K-D-IZW-75.COL1a1_Cyg-Gall.consensus:AnsAna_Branta_leucopsis_DBGNRM65.COL1a1_Cyg-Gall.consensus:AnsAna_Aythya_marila_GCA_029042245.1.COL1a1_Cyg-Gall.consensus:AnsAna_Tadorna…	DB Search
GP(+15.99)PGP(+15.99)MGPPGLAGPPGEAGR	93.7	1799.86	20	0.4	600.962	3	28.5361	15893	20201209_Lumos_Ritcher_sample148_17.raw	6020000	1	1	Proline Oxidation;Proline Oxidation	P2:Proline Oxidation:17.01;P5:Proline Oxidation:14.63	AnsAna_Anas_undulata_B10K-D-IZW-61.COL1a1_Cyg-Gall.consensus:AnsAna_Aythya_americana_D2006016050.COL1a1_Cyg-Gall.consensus:AnsAna_Pteronetta_hartlaubii_D2102046034.COL1a1_Cyg-Gall.consensus:AnsAna_Cereopsis_novaehollandiae_B10K-D-IZW-75.COL1a1_Cyg-Gall.consensus:AnsAna_Branta_leucopsis_DBGNRM65.COL1a1_Cyg-Gall.consensus:AnsAna_Aythya_marila_GCA_029042245.1.COL1a1_Cyg-Gall.consensus:AnsAna_Tadorna…	DB Search
GP(+15.99)PGPAGPTGAP(+15.99)GPAGAVGAP(+15.99)GPK	93.47	1981.99	24	-4.5	661.666	3	23.2522	10518	20201209_Lumos_Ritcher_sample148_17.raw	115000	1	1	Proline Oxidation;Proline Oxidation;Proline Oxidation	P2:Proline Oxidation:10.11;P12:Proline Oxidation:24.67;P21:Proline Oxidation:0.00	AnsAna_Anas_undulata_B10K-D-IZW-61.COL1a1_Cyg-Gall.consensus:AnsAna_Cereopsis_novaehollandiae_B10K-D-IZW-75.COL1a1_Cyg-Gall.consensus:AnsAna_Aythya_marila_GCA_029042245.1.COL1a1_Cyg-Gall.consensus:AnsAna_Tadorna_tadorna_DBGNRM58.COL1a1_Cyg-Gall.consensus:AnsAna_Anser_cygnoides_GCA_025388735.1.COL1a1_Cyg-Gall.consensus:AnsAna_Branta_hutchinsii_GCA_032270845.1.COL1a1_Cyg-Gall.consensus:AnsAna_Spatu…	DB Search
GP(+15.99)PGPMGPP(+15.99)GLAGPP(+15.99)GEAGR	82.68	1815.86	20	1.3	908.937	2	28.9043	16268	20201209_Lumos_Ritcher_sample148_17.raw		0	0	Proline Oxidation;Proline Oxidation;Proline Oxidation	P2:Proline Oxidation:17.01;P9:Proline Oxidation:0.00;P15:Proline Oxidation:12.28	AnsAna_Anas_undulata_B10K-D-IZW-61.COL1a1_Cyg-Gall.consensus:AnsAna_Aythya_americana_D2006016050.COL1a1_Cyg-Gall.consensus:AnsAna_Pteronetta_hartlaubii_D2102046034.COL1a1_Cyg-Gall.consensus:AnsAna_Cereopsis_novaehollandiae_B10K-D-IZW-75.COL1a1_Cyg-Gall.consensus:AnsAna_Branta_leucopsis_DBGNRM65.COL1a1_Cyg-Gall.consensus:AnsAna_Aythya_marila_GCA_029042245.1.COL1a1_Cyg-Gall.consensus:AnsAna_Tadorna…	DB Search
GP(+15.99)PGPMGPPGLAGPP(+15.99)GEAGR	94.55	1799.86	20	-0.3	600.961	3	30.613	17974	20201209_Lumos_Ritcher_sample148_17.raw	104000	1	1	Proline Oxidation;Proline Oxidation	P2:Proline Oxidation:14.02;P15:Proline Oxidation:11.06	AnsAna_Anas_undulata_B10K-D-IZW-61.COL1a1_Cyg-Gall.consensus:AnsAna_Aythya_americana_D2006016050.COL1a1_Cyg-Gall.consensus:AnsAna_Pteronetta_hartlaubii_D2102046034.COL1a1_Cyg-Gall.consensus:AnsAna_Cereopsis_novaehollandiae_B10K-D-IZW-75.COL1a1_Cyg-Gall.consensus:AnsAna_Branta_leucopsis_DBGNRM65.COL1a1_Cyg-Gall.consensus:AnsAna_Aythya_marila_GCA_029042245.1.COL1a1_Cyg-Gall.consensus:AnsAna_Tadorna…	DB Search
GP(+15.99)PGPP(+15.99)GAP(+15.99)GEQGPSGASGPAGPR	93.84	2098.97	24	-0.3	700.663	3	19.7424	6928	20201209_Lumos_Ritcher_sample148_17.raw	337000	1	1	Proline Oxidation;Proline Oxidation;Proline Oxidation	P2:Proline Oxidation:12.28;P6:Proline Oxidation:12.28;P9:Proline Oxidation:34.30	AnsAna_Anas_undulata_B10K-D-IZW-61.COL1a1_Cyg-Gall.consensus:AnsAna_Aythya_americana_D2006016050.COL1a1_Cyg-Gall.consensus:AnsAna_Pteronetta_hartlaubii_D2102046034.COL1a1_Cyg-Gall.consensus:AnsAna_Cereopsis_novaehollandiae_B10K-D-IZW-75.COL1a1_Cyg-Gall.consensus:AnsAna_Branta_leucopsis_DBGNRM65.COL1a1_Cyg-Gall.consensus:AnsAna_Aythya_marila_GCA_029042245.1.COL1a1_Cyg-Gall.consensus:AnsAna_Tadorna…	DB Search
GP(+15.99)PGPPGAP(+15.99)GEQ(+0.98)GPSGASGPAGPR	88.44	2083.96	24	-1.8	1042.98	2	22.0219	9201	20201209_Lumos_Ritcher_sample148_17.raw	250000	1	1	Proline Oxidation;Proline Oxidation;Deamidation (NQ)	P2:Proline Oxidation:17.01;P9:Proline Oxidation:28.36;Q12:Deamidation (NQ):1000.00	AnsAna_Anas_undulata_B10K-D-IZW-61.COL1a1_Cyg-Gall.consensus:AnsAna_Aythya_americana_D2006016050.COL1a1_Cyg-Gall.consensus:AnsAna_Pteronetta_hartlaubii_D2102046034.COL1a1_Cyg-Gall.consensus:AnsAna_Cereopsis_novaehollandiae_B10K-D-IZW-75.COL1a1_Cyg-Gall.consensus:AnsAna_Branta_leucopsis_DBGNRM65.COL1a1_Cyg-Gall.consensus:AnsAna_Aythya_marila_GCA_029042245.1.COL1a1_Cyg-Gall.consensus:AnsAna_Tadorna…	DB Search
GP(+15.99)PGPPGSP(+15.99)GEQ(+0.98)GPSGASGPAGPR	90.35	2099.95	24	-1.2	700.99	3	20.3484	7502	20201209_Lumos_Ritcher_sample148_17.raw	1500000	1	1	Proline Oxidation;Proline Oxidation;Deamidation (NQ)	P2:Proline Oxidation:8.69;P9:Proline Oxidation:22.45;Q12:Deamidation (NQ):1000.00	AnsAna_Aix_sponsa_GCA_032270905.1.COL1a1_Cyg-Gall.consensus	DB Search
GP(+15.99)PGPPGSPGEQGPSGASGPAGPR	86.7	2082.97	24	-0.8	695.331	3	21.4454	8814	20201209_Lumos_Ritcher_sample148_17.raw	295000	1	1	Proline Oxidation	P2:Proline Oxidation:17.01	AnsAna_Aix_sponsa_GCA_032270905.1.COL1a1_Cyg-Gall.consensus	DB Search
GP(+15.99)PGSAGAAGKDGLN(+0.98)GLPGP(+15.99)IGP(+15.99)P(+15.99)GPR	41.06	2428.2	27	-1	1215.11	2	29.4851	16874	20201209_Lumos_Ritcher_sample148_17.raw		0	0	Proline Oxidation;Deamidation (NQ);Proline Oxidation;Proline Oxidation;Proline Oxidation	P2:Proline Oxidation:12.28;N15:Deamidation (NQ):1000.00;P20:Proline Oxidation:0.00;P23:Proline Oxidation:0.00;P24:Proline Oxidation:0.00	AnsAna_Spatula_discors_GCA_032165275.1.COL1a1_Cyg-Gall.consensus:AnsAna_Mareca_sibilatrix_GCA_034783215.1.COL1a1_Cyg-Gall.consensus:AnsAna_Pteronetta_hartlaubii_D2102046034.COL1a1_Cyg-Gall.consensus:AnsAna_Tachyeres_brachypterus_GCA_032357605.1.COL1a1_Cyg-Gall.consensus:AnsAna_Branta_leucopsis_DBGNRM65.COL1a1_Cyg-Gall.consensus:AnsAna_Aythya_marila_GCA_029042245.1.COL1a1_Cyg-Gall.consensus:AnsAna…	SPIDER
GP(+15.99)SGEAGAQ(+0.98)GPPGTPGPQGILGAP(+15.99)GILGLPGSR	55.04	2952.49	33	-0.2	985.172	3	48.4197	36463	20201209_Lumos_Ritcher_sample148_17.raw	75400	1	1	Proline Oxidation;Deamidation (NQ);Proline Oxidation	P2:Proline Oxidation:9.99;Q9:Deamidation (NQ):1000.00;P24:Proline Oxidation:22.09	AnsAna_Anas_bahamensis_D2007020419.COL1a2_Anas.consensus:AnsAna_Anas_acuta_GCA_963932015.1.COL1a2_Anas.consensus	DB Search
GP(+15.99)SGEAGAQGPPGTPGPQGILGAP(+15.99)GILGLP(+15.99)GSR	84.67	2967.5	33	-5.4	990.17	3	45.6292	33838	20201209_Lumos_Ritcher_sample148_17.raw		0	0	Proline Oxidation;Proline Oxidation;Proline Oxidation	P2:Proline Oxidation:14.29;P24:Proline Oxidation:67.12;P30:Proline Oxidation:90.97	AnsAna_Anas_bahamensis_D2007020419.COL1a2_Anas.consensus:AnsAna_Anas_acuta_GCA_963932015.1.COL1a2_Anas.consensus	DB Search
GP(+15.99)SGESGSPGPPGTPGPQ(+0.98)GILGAP(+15.99)GILGLPGSR	54.53	2953.48	33	1.4	985.501	3	49.4113	37618	20201209_Lumos_Ritcher_sample148_17.raw	12500	1	1	Proline Oxidation;Deamidation (NQ);Proline Oxidation	P2:Proline Oxidation:8.82;Q18:Deamidation (NQ):1000.00;P24:Proline Oxidation:31.37	AnsAna_Cereopsis_novaehollandiae_B10K-D-IZW-75.COL1a2_Anas.consensus	DB Search
GP(+15.99)SGESGSPGPPGTPGPQGILGAP(+15.99)GILGLP(+15.99)GSR	47.65	2968.49	33	0.6	1485.25	2	46.3801	34600	20201209_Lumos_Ritcher_sample148_17.raw	89800	2	2	Proline Oxidation;Proline Oxidation;Proline Oxidation	P2:Proline Oxidation:0.00;P24:Proline Oxidation:7.81;P30:Proline Oxidation:24.79	AnsAna_Cereopsis_novaehollandiae_B10K-D-IZW-75.COL1a2_Anas.consensus	DB Search
GP(+15.99)TGEP(+15.99)GKPGEKGN(+0.98)VGLAGPR	46.29	2007	21	0	502.758	4	18.3616	5529	20201209_Lumos_Ritcher_sample148_17.raw	77800	1	1	Proline Oxidation;Proline Oxidation;Deamidation (NQ)	P2:Proline Oxidation:8.82;P6:Proline Oxidation:0.00;N14:Deamidation (NQ):1000.00	AnsAna_Spatula_platalea_D2007020414.COL1a2_Anas.consensus:AnsAna_Chloephaga_rubidiceps_D2104051194.COL1a2_Anas.consensus:AnsAna_Cygnus_atratus_GCA_013377495.2.COL1a2_Anas.consensus:AnsAna_Plectropterus_gambensis_B10K-D-WWT-22.COL1a2_Anas.consensus:AnsAna_Aythya_affinis_CL200153793_L02.COL1a2_Anas.consensus:AnsAna_Somateria_spectabilis_D2006016067.COL1a2_Anas.consensus:AnsAna_Dendrocygna_guttata_B…	DB Search
GP(+15.99)VGPAGKNGDRGETGPAGPAGP(+15.99)PGPAGAR	75.59	2653.3	30	2.9	885.442	3	22.2417	9421	20201209_Lumos_Ritcher_sample148_17.raw		0	0	Proline Oxidation;Proline Oxidation	P2:Proline Oxidation:12.33;P23:Proline Oxidation:0.00	AnsAna_Anas_undulata_B10K-D-IZW-61.COL1a1_Cyg-Gall.consensus:AnsAna_Aythya_americana_D2006016050.COL1a1_Cyg-Gall.consensus:AnsAna_Pteronetta_hartlaubii_D2102046034.COL1a1_Cyg-Gall.consensus:AnsAna_Cereopsis_novaehollandiae_B10K-D-IZW-75.COL1a1_Cyg-Gall.consensus:AnsAna_Branta_leucopsis_DBGNRM65.COL1a1_Cyg-Gall.consensus:AnsAna_Aythya_marila_GCA_029042245.1.COL1a1_Cyg-Gall.consensus:AnsAna_Tadorna…	DB Search
GPAGHVGPAGAFGPR	93.53	1346.68	15	1.1	449.903	3	25.2415	12538	20201209_Lumos_Ritcher_sample148_17.raw		0	0			AnsAna_Lophodytes_cucullatus_B10K-D-WWT-15.COL1a2_Anas.consensus:AnsAna_Spatula_platalea_D2007020414.COL1a2_Anas.consensus:AnsAna_Spatula_smithii_GCA_035221675.1.COL1a2_Anas.consensus:AnsAna_Anas_gibberifrons_D2007020344.COL1a2_Anas.consensus:AnsAna_Aythya_baeri_GCA_026413565.1.COL1a2_Anas.consensus:AnsAna_Cyanochen_cyanoptera_B10K-D-WWT-10.COL1a2_Anas.consensus:AnsAna_Chloephaga_rubidiceps_D2104…	DB Search
GPAGNVGPTGPAGPR	85.64	1303.66	15	-1.7	652.838	2	27.401	14859	20201209_Lumos_Ritcher_sample148_17.raw	79100	1	1			AnsAna_Spatula_platalea_D2007020414.COL1a2_Anas.consensus:AnsAna_Chloephaga_rubidiceps_D2104051194.COL1a2_Anas.consensus:AnsAna_Plectropterus_gambensis_B10K-D-WWT-22.COL1a2_Anas.consensus:AnsAna_Aythya_affinis_CL200153793_L02.COL1a2_Anas.consensus:AnsAna_Somateria_spectabilis_D2006016067.COL1a2_Anas.consensus:AnsAna_Neochen_jubata_B10K-D-WWT-20.COL1a2_Anas.consensus:AnsAna_Anas_fulvigula_D2005012…	DB Search
GPAGP(+15.99)PGFQGLP(+15.99)GPSGPAGEAGKP(+15.99)GER	95.96	2489.19	27	-9.2	830.731	3	31.0026	18442	20201209_Lumos_Ritcher_sample148_17.raw		0	0	Proline Oxidation;Proline Oxidation;Proline Oxidation	P5:Proline Oxidation:9.05;P12:Proline Oxidation:13.67;P24:Proline Oxidation:43.57	AnsAna_Spatula_platalea_D2007020414.COL1a2_Anas.consensus:AnsAna_Chloephaga_rubidiceps_D2104051194.COL1a2_Anas.consensus:AnsAna_Cygnus_atratus_GCA_013377495.2.COL1a2_Anas.consensus:AnsAna_Plectropterus_gambensis_B10K-D-WWT-22.COL1a2_Anas.consensus:AnsAna_Aythya_affinis_CL200153793_L02.COL1a2_Anas.consensus:AnsAna_Somateria_spectabilis_D2006016067.COL1a2_Anas.consensus:AnsAna_Dendrocygna_guttata_B…	DB Search
GPAGPP(+15.99)GEAGKP(+15.99)GEQGVPGDAGAPGP(+15.99)AGAR	88.32	2626.24	30	-5.3	876.415	3	20.301	7476	20201209_Lumos_Ritcher_sample148_17.raw		0	0	Proline Oxidation;Proline Oxidation;Proline Oxidation	P6:Proline Oxidation:33.98;P12:Proline Oxidation:26.50;P26:Proline Oxidation:0.00	AnsAna_Anas_undulata_B10K-D-IZW-61.COL1a1_Cyg-Gall.consensus:AnsAna_Aythya_americana_D2006016050.COL1a1_Cyg-Gall.consensus:AnsAna_Cereopsis_novaehollandiae_B10K-D-IZW-75.COL1a1_Cyg-Gall.consensus:AnsAna_Branta_leucopsis_DBGNRM65.COL1a1_Cyg-Gall.consensus:AnsAna_Aythya_marila_GCA_029042245.1.COL1a1_Cyg-Gall.consensus:AnsAna_Tadorna_tadorna_DBGNRM58.COL1a1_Cyg-Gall.consensus:AnsAna_Anser_cygnoides_…	DB Search
GPAGPP(+15.99)GFQGLP(+15.99)GPSGPAGEAGKP(+15.99)GER	92.08	2489.19	27	-0.9	830.738	3	30.1956	17606	20201209_Lumos_Ritcher_sample148_17.raw	62800	1	1	Proline Oxidation;Proline Oxidation;Proline Oxidation	P6:Proline Oxidation:14.58;P12:Proline Oxidation:28.86;P24:Proline Oxidation:37.50	AnsAna_Spatula_platalea_D2007020414.COL1a2_Anas.consensus:AnsAna_Chloephaga_rubidiceps_D2104051194.COL1a2_Anas.consensus:AnsAna_Cygnus_atratus_GCA_013377495.2.COL1a2_Anas.consensus:AnsAna_Plectropterus_gambensis_B10K-D-WWT-22.COL1a2_Anas.consensus:AnsAna_Aythya_affinis_CL200153793_L02.COL1a2_Anas.consensus:AnsAna_Somateria_spectabilis_D2006016067.COL1a2_Anas.consensus:AnsAna_Dendrocygna_guttata_B…	DB Search
GPAGPQ(+0.98)GPR	52.49	836.414	9	0	419.214	2	16.6665	4257	20201209_Lumos_Ritcher_sample148_17.raw	882000	3	3	Deamidation (NQ)	Q6:Deamidation (NQ):1000.00	AnsAna_Aythya_americana_D2006016050.COL1a1_Cyg-Gall.consensus:AnsAna_Anas_undulata_B10K-D-IZW-61.COL1a1_Cyg-Gall.consensus:AnsAna_Pteronetta_hartlaubii_D2102046034.COL1a1_Cyg-Gall.consensus:AnsAna_Cereopsis_novaehollandiae_B10K-D-IZW-75.COL1a1_Cyg-Gall.consensus:AnsAna_Branta_leucopsis_DBGNRM65.COL1a1_Cyg-Gall.consensus:AnsAna_Aythya_marila_GCA_029042245.1.COL1a1_Cyg-Gall.consensus:AnsAna_Tadorna…	DB Search
GPAGPQGPR	66.77	835.43	9	0.1	418.722	2	15.5254	3729	20201209_Lumos_Ritcher_sample148_17.raw	481000	1	1			AnsAna_Anas_undulata_B10K-D-IZW-61.COL1a1_Cyg-Gall.consensus:AnsAna_Aythya_americana_D2006016050.COL1a1_Cyg-Gall.consensus:AnsAna_Pteronetta_hartlaubii_D2102046034.COL1a1_Cyg-Gall.consensus:AnsAna_Cereopsis_novaehollandiae_B10K-D-IZW-75.COL1a1_Cyg-Gall.consensus:AnsAna_Branta_leucopsis_DBGNRM65.COL1a1_Cyg-Gall.consensus:AnsAna_Aythya_marila_GCA_029042245.1.COL1a1_Cyg-Gall.consensus:AnsAna_Tadorna…	DB Search
GPE(sub K)GETGPTGAIGPIGASGPP(+15.99)GPAGAAGPAGPR	51.16	2793.37	33	0.8	932.131	3	34.6172	22143	20201209_Lumos_Ritcher_sample148_17.raw	450000	1	1	Lys->Glu substitution;Proline Oxidation	P21:Proline Oxidation:14.02	AnsAna_Alopochen_aegyptiaca_D1907004292.COL1a2_Anas.consensus:AnsAna_Mergellus_albellus_B10K-D-WWT-19.COL1a2_Anas.consensus:AnsAna_Anas_gibberifrons_D2007020344.COL1a2_Anas.consensus:AnsAna_Oxyura_jamaicensis_GCA_011077185.1.COL1a2_Anas.consensus:AnsAna_Lophonetta_specularioides_GCA_032165235.1.COL1a2_Anas.consensus:AnsAna_Mareca_falcata_D2006016302.COL1a2_Anas.consensus:AnsAna_Aythya_americana_D…	SPIDER
GPIGAAGPP(+15.99)GFP(+15.99)GAP(+15.99)GAK	93.14	1565.78	18	-1.4	783.898	2	29.8825	17318	20201209_Lumos_Ritcher_sample148_17.raw	234000	1	1	Proline Oxidation;Proline Oxidation;Proline Oxidation	P9:Proline Oxidation:10.11;P12:Proline Oxidation:42.89;P15:Proline Oxidation:51.59	AnsAna_Spatula_platalea_D2007020414.COL1a2_Anas.consensus:AnsAna_Chloephaga_rubidiceps_D2104051194.COL1a2_Anas.consensus:AnsAna_Cygnus_atratus_GCA_013377495.2.COL1a2_Anas.consensus:AnsAna_Plectropterus_gambensis_B10K-D-WWT-22.COL1a2_Anas.consensus:AnsAna_Aythya_affinis_CL200153793_L02.COL1a2_Anas.consensus:AnsAna_Somateria_spectabilis_D2006016067.COL1a2_Anas.consensus:AnsAna_Dendrocygna_guttata_B…	DB Search
GPIGAAGPP(+15.99)GFPGAP(+15.99)GAK	93.77	1549.79	18	-0.1	775.902	2	32.0062	19602	20201209_Lumos_Ritcher_sample148_17.raw	783000	1	1	Proline Oxidation;Proline Oxidation	P9:Proline Oxidation:8.69;P15:Proline Oxidation:14.84	AnsAna_Spatula_platalea_D2007020414.COL1a2_Anas.consensus:AnsAna_Chloephaga_rubidiceps_D2104051194.COL1a2_Anas.consensus:AnsAna_Cygnus_atratus_GCA_013377495.2.COL1a2_Anas.consensus:AnsAna_Plectropterus_gambensis_B10K-D-WWT-22.COL1a2_Anas.consensus:AnsAna_Aythya_affinis_CL200153793_L02.COL1a2_Anas.consensus:AnsAna_Somateria_spectabilis_D2006016067.COL1a2_Anas.consensus:AnsAna_Dendrocygna_guttata_B…	DB Search
GPIGAP(+15.99)GTP(+15.99)GPQ(+0.98)GIAGQR	93.75	1662.83	18	-1.4	832.422	2	27.2438	14649	20201209_Lumos_Ritcher_sample148_17.raw		0	0	Proline Oxidation;Proline Oxidation;Deamidation (NQ)	P6:Proline Oxidation:106.29;P9:Proline Oxidation:18.53;Q12:Deamidation (NQ):24.47	AnsAna_Neochen_jubata_B10K-D-WWT-20.COL1a1_Cyg-Gall.consensus:AnsAna_Cereopsis_novaehollandiae_B10K-D-IZW-75.COL1a1_Cyg-Gall.consensus:AnsAna_Mareca_penelope_GCA_036026335.1.COL1a1_Cyg-Gall.consensus:AnsAna_Spatula_rhynchotis_GCA_034783165.1.COL1a1_Cyg-Gall.consensus:AnsAna_Aythya_marila_GCA_029042245.1.COL1a1_Cyg-Gall.consensus:AnsAna_Anser_cygnoides_GCA_025388735.1.COL1a1_Cyg-Gall.consensus:Ans…	DB Search
GPIGAP(+15.99)GTP(+15.99)GPQGIAGQ(+0.98)R	92.29	1662.83	18	-1.7	832.422	2	27.0333	14345	20201209_Lumos_Ritcher_sample148_17.raw	1770000	2	2	Proline Oxidation;Proline Oxidation;Deamidation (NQ)	P6:Proline Oxidation:77.51;P9:Proline Oxidation:36.05;Q17:Deamidation (NQ):38.96	AnsAna_Neochen_jubata_B10K-D-WWT-20.COL1a1_Cyg-Gall.consensus:AnsAna_Cereopsis_novaehollandiae_B10K-D-IZW-75.COL1a1_Cyg-Gall.consensus:AnsAna_Mareca_penelope_GCA_036026335.1.COL1a1_Cyg-Gall.consensus:AnsAna_Spatula_rhynchotis_GCA_034783165.1.COL1a1_Cyg-Gall.consensus:AnsAna_Aythya_marila_GCA_029042245.1.COL1a1_Cyg-Gall.consensus:AnsAna_Anser_cygnoides_GCA_025388735.1.COL1a1_Cyg-Gall.consensus:Ans…	DB Search
GPIGAP(+15.99)GTP(+15.99)GPQGIAGQR	90.61	1661.85	18	0.4	554.957	3	25.9411	13090	20201209_Lumos_Ritcher_sample148_17.raw	4460000	2	2	Proline Oxidation;Proline Oxidation	P6:Proline Oxidation:32.48;P9:Proline Oxidation:39.76	AnsAna_Neochen_jubata_B10K-D-WWT-20.COL1a1_Cyg-Gall.consensus:AnsAna_Cereopsis_novaehollandiae_B10K-D-IZW-75.COL1a1_Cyg-Gall.consensus:AnsAna_Mareca_penelope_GCA_036026335.1.COL1a1_Cyg-Gall.consensus:AnsAna_Spatula_rhynchotis_GCA_034783165.1.COL1a1_Cyg-Gall.consensus:AnsAna_Aythya_marila_GCA_029042245.1.COL1a1_Cyg-Gall.consensus:AnsAna_Anser_cygnoides_GCA_025388735.1.COL1a1_Cyg-Gall.consensus:Ans…	DB Search
GPIGASGPP(+15.99)GPAGAAGPAGPR	92.64	1726.88	21	-1.2	864.444	2	33.9503	21475	20201209_Lumos_Ritcher_sample148_17.raw	3490000	3	3	Proline Oxidation	P9:Proline Oxidation:23.10	AnsAna_Lophodytes_cucullatus_B10K-D-WWT-15.COL1a2_Anas.consensus:AnsAna_Spatula_platalea_D2007020414.COL1a2_Anas.consensus:AnsAna_Spatula_smithii_GCA_035221675.1.COL1a2_Anas.consensus:AnsAna_Anas_gibberifrons_D2007020344.COL1a2_Anas.consensus:AnsAna_Aythya_baeri_GCA_026413565.1.COL1a2_Anas.consensus:AnsAna_Cyanochen_cyanoptera_B10K-D-WWT-10.COL1a2_Anas.consensus:AnsAna_Plectropterus_gambensis_B10…	DB Search
GPIGP(+15.99)PGPAGAP(+15.99)GDKGEAGPP(+15.99)GPAGPTGAR	88.06	2607.27	30	-0.2	870.096	3	23.5699	10567	20201209_Lumos_Ritcher_sample148_17.raw	3940000	1	1	Proline Oxidation;Proline Oxidation;Proline Oxidation	P5:Proline Oxidation:0.00;P12:Proline Oxidation:11.12;P21:Proline Oxidation:12.28	AnsAna_Anas_undulata_B10K-D-IZW-61.COL1a1_Cyg-Gall.consensus:AnsAna_Aythya_americana_D2006016050.COL1a1_Cyg-Gall.consensus:AnsAna_Cereopsis_novaehollandiae_B10K-D-IZW-75.COL1a1_Cyg-Gall.consensus:AnsAna_Branta_leucopsis_DBGNRM65.COL1a1_Cyg-Gall.consensus:AnsAna_Aythya_marila_GCA_029042245.1.COL1a1_Cyg-Gall.consensus:AnsAna_Tadorna_tadorna_DBGNRM58.COL1a1_Cyg-Gall.consensus:AnsAna_Anser_cygnoides_…	DB Search
GPIGPAGKN(+0.98)GDRGETGPAGPAGPP(+15.99)GPAGAR	56.96	2652.3	30	4.7	885.112	3	22.2289	9503	20201209_Lumos_Ritcher_sample148_17.raw	113000	1	1	Deamidation (NQ);Proline Oxidation	N9:Deamidation (NQ):1000.00;P24:Proline Oxidation:9.40	AnsAna_Netta_rufina_MOB-64.COL1a1_Cyg-Gall.consensus	DB Search
GPIGPP(+15.99)GPAGAP(+15.99)GDKGEAGPP(+15.99)GPAGPTGAR	94.32	2607.27	30	-0.9	870.096	3	23.835	11149	20201209_Lumos_Ritcher_sample148_17.raw		0	0	Proline Oxidation;Proline Oxidation;Proline Oxidation	P6:Proline Oxidation:12.28;P12:Proline Oxidation:16.51;P21:Proline Oxidation:12.28	AnsAna_Anas_undulata_B10K-D-IZW-61.COL1a1_Cyg-Gall.consensus:AnsAna_Aythya_americana_D2006016050.COL1a1_Cyg-Gall.consensus:AnsAna_Cereopsis_novaehollandiae_B10K-D-IZW-75.COL1a1_Cyg-Gall.consensus:AnsAna_Branta_leucopsis_DBGNRM65.COL1a1_Cyg-Gall.consensus:AnsAna_Aythya_marila_GCA_029042245.1.COL1a1_Cyg-Gall.consensus:AnsAna_Tadorna_tadorna_DBGNRM58.COL1a1_Cyg-Gall.consensus:AnsAna_Anser_cygnoides_…	DB Search
GPKGETGPTGAIGP(+15.99)VGASGPP(+15.99)GPAGAAGPAGPR	47.39	2794.4	33	4.2	699.61	4	30.988	18496	20201209_Lumos_Ritcher_sample148_17.raw	165000	1	1	Proline Oxidation;Proline Oxidation	P14:Proline Oxidation:6.69;P21:Proline Oxidation:17.01	AnsAna_Anser_indicus_GCA_025583725.1.COL1a2_Anas.consensus:AnsAna_Chloephaga_poliocephala_B10K-D-IZW-11.COL1a2_Anas.consensus:AnsAna_Branta_ruficollis_D2104051282.COL1a2_Anas.consensus:AnsAna_Cygnus_olor_GCA_009769485.2.COL1a2_Anas.consensus:AnsAna_Chloephaga_rubidiceps_D2104051194.COL1a2_Anas.consensus:AnsAna_Cygnus_atratus_GCA_013377495.2.COL1a2_Anas.consensus:AnsAna_Cygnus_buccinator_GCA_01923…	DB Search
GPKGETGPTGAIGPIGASGPP(+15.99)GPAGAAGPAGPR	92.74	2792.42	33	0	931.814	3	31.0372	18487	20201209_Lumos_Ritcher_sample148_17.raw	2110000	1	1	Proline Oxidation	P21:Proline Oxidation:10.11	AnsAna_Lophodytes_cucullatus_B10K-D-WWT-15.COL1a2_Anas.consensus:AnsAna_Spatula_platalea_D2007020414.COL1a2_Anas.consensus:AnsAna_Spatula_smithii_GCA_035221675.1.COL1a2_Anas.consensus:AnsAna_Anas_gibberifrons_D2007020344.COL1a2_Anas.consensus:AnsAna_Aythya_baeri_GCA_026413565.1.COL1a2_Anas.consensus:AnsAna_Cyanochen_cyanoptera_B10K-D-WWT-10.COL1a2_Anas.consensus:AnsAna_Plectropterus_gambensis_B10…	DB Search
GPKGETGPTGAIGPQ(sub V)GASGPP(+15.99)GPAGAAGP(+15.99)AGPR	43.24	2823.39	33	5.4	942.142	3	29.6651	17049	20201209_Lumos_Ritcher_sample148_17.raw		0	0	Val->Gln substitution;Proline Oxidation;Proline Oxidation	P21:Proline Oxidation:17.01;P29:Proline Oxidation:5.08	AnsAna_Branta_leucopsis_DBGNRM65.COL1a2_Anas.consensus:AnsAna_Branta_hutchinsii_B10K-D-MSB-25.COL1a2_Anas.consensus:AnsAna_Anser_indicus_GCA_025583725.1.COL1a2_Anas.consensus:AnsAna_Anser_albifrons_DBG-30.COL1a2_Anas.consensus:AnsAna_Anser_erythropus_DBGNRM61.COL1a2_Anas.consensus:AnsAna_Anser_brachyrhynchus_GCA_002592135.1.COL1a2_Anas.consensus:AnsAna_Cygnus_olor_GCA_009769485.2.COL1a2_Anas.cons…	SPIDER
GPKGETGPTGAIGPVGAQ(sub S)GPP(+15.99)GPAGAAGPAGPR	43.59	2819.43	33	-6.3	940.812	3	34.6383	22235	20201209_Lumos_Ritcher_sample148_17.raw		0	0	Ser->Gln substitution;Proline Oxidation	P21:Proline Oxidation:14.63	AnsAna_Anser_brachyrhynchus_GCA_002592135.1.COL1a2_Anas.consensus:AnsAna_Cygnus_olor_GCA_009769485.2.COL1a2_Anas.consensus:AnsAna_Anser_indicus_GCA_006229135.1.COL1a2_Anas.consensus:AnsAna_Cygnus_olor_GCA_009769625.2.COL1a2_Anas.consensus	SPIDER
GPNGGGYEVGYDAEYYR	76.98	1865.79	17	2.9	933.903	2	32.2837	19826	20201209_Lumos_Ritcher_sample148_17.raw		0	0			AnsAna_Spatula_platalea_D2007020414.COL1a2_Anas.consensus:AnsAna_Chloephaga_rubidiceps_D2104051194.COL1a2_Anas.consensus:AnsAna_Cygnus_atratus_GCA_013377495.2.COL1a2_Anas.consensus:AnsAna_Plectropterus_gambensis_B10K-D-WWT-22.COL1a2_Anas.consensus:AnsAna_Aythya_affinis_CL200153793_L02.COL1a2_Anas.consensus:AnsAna_Somateria_spectabilis_D2006016067.COL1a2_Anas.consensus:AnsAna_Dendrocygna_guttata_B…	DB Search
GPP(+15.99)GAVGAAGKDGEAGAQ(+0.98)GPP(+15.99)GPTGPAGER	83.61	2615.22	30	-2.3	872.746	3	20.9919	8159	20201209_Lumos_Ritcher_sample148_17.raw	93900	1	1	Proline Oxidation;Deamidation (NQ);Proline Oxidation	P3:Proline Oxidation:0.00;Q18:Deamidation (NQ):1000.00;P21:Proline Oxidation:14.02	AnsAna_Anas_undulata_B10K-D-IZW-61.COL1a1_Cyg-Gall.consensus:AnsAna_Aythya_americana_D2006016050.COL1a1_Cyg-Gall.consensus:AnsAna_Cereopsis_novaehollandiae_B10K-D-IZW-75.COL1a1_Cyg-Gall.consensus:AnsAna_Branta_leucopsis_DBGNRM65.COL1a1_Cyg-Gall.consensus:AnsAna_Aythya_marila_GCA_029042245.1.COL1a1_Cyg-Gall.consensus:AnsAna_Tadorna_tadorna_DBGNRM58.COL1a1_Cyg-Gall.consensus:AnsAna_Anser_cygnoides_…	DB Search
GPP(+15.99)GAVGAAGKDGEAGAQ(+0.98)GPPGPTGPAGER	93.32	2599.23	30	-1.1	867.415	3	22.288	9451	20201209_Lumos_Ritcher_sample148_17.raw	194000	1	1	Proline Oxidation;Deamidation (NQ)	P3:Proline Oxidation:0.00;Q18:Deamidation (NQ):1000.00	AnsAna_Anas_undulata_B10K-D-IZW-61.COL1a1_Cyg-Gall.consensus:AnsAna_Aythya_americana_D2006016050.COL1a1_Cyg-Gall.consensus:AnsAna_Cereopsis_novaehollandiae_B10K-D-IZW-75.COL1a1_Cyg-Gall.consensus:AnsAna_Branta_leucopsis_DBGNRM65.COL1a1_Cyg-Gall.consensus:AnsAna_Aythya_marila_GCA_029042245.1.COL1a1_Cyg-Gall.consensus:AnsAna_Tadorna_tadorna_DBGNRM58.COL1a1_Cyg-Gall.consensus:AnsAna_Anser_cygnoides_…	DB Search
GPP(+15.99)GESGAVGP(+15.99)AGP(+15.99)IGSR	92.24	1609.77	18	-0.4	805.892	2	25.2349	12530	20201209_Lumos_Ritcher_sample148_17.raw		0	0	Proline Oxidation;Proline Oxidation;Proline Oxidation	P3:Proline Oxidation:15.10;P11:Proline Oxidation:140.39;P14:Proline Oxidation:105.75	AnsAna_Spatula_platalea_D2007020414.COL1a2_Anas.consensus:AnsAna_Chloephaga_rubidiceps_D2104051194.COL1a2_Anas.consensus:AnsAna_Cygnus_atratus_GCA_013377495.2.COL1a2_Anas.consensus:AnsAna_Plectropterus_gambensis_B10K-D-WWT-22.COL1a2_Anas.consensus:AnsAna_Aythya_affinis_CL200153793_L02.COL1a2_Anas.consensus:AnsAna_Somateria_spectabilis_D2006016067.COL1a2_Anas.consensus:AnsAna_Dendrocygna_guttata_B…	DB Search
GPP(+15.99)GESGAVGPAGP(+15.99)IGSR	93.91	1593.77	18	0.2	797.895	2	23.4696	10867	20201209_Lumos_Ritcher_sample148_17.raw	191000	1	1	Proline Oxidation;Proline Oxidation	P3:Proline Oxidation:15.91;P14:Proline Oxidation:12.33	AnsAna_Spatula_platalea_D2007020414.COL1a2_Anas.consensus:AnsAna_Chloephaga_rubidiceps_D2104051194.COL1a2_Anas.consensus:AnsAna_Cygnus_atratus_GCA_013377495.2.COL1a2_Anas.consensus:AnsAna_Plectropterus_gambensis_B10K-D-WWT-22.COL1a2_Anas.consensus:AnsAna_Aythya_affinis_CL200153793_L02.COL1a2_Anas.consensus:AnsAna_Somateria_spectabilis_D2006016067.COL1a2_Anas.consensus:AnsAna_Dendrocygna_guttata_B…	DB Search
GPP(+15.99)GESGAVGPAGPIG	60.66	1334.65	16	-0.6	668.33	2	30.0234	17253	20201209_Lumos_Ritcher_sample148_17.raw	4260000	1	1	Proline Oxidation	P3:Proline Oxidation:12.28	AnsAna_Spatula_platalea_D2007020414.COL1a2_Anas.consensus:AnsAna_Chloephaga_rubidiceps_D2104051194.COL1a2_Anas.consensus:AnsAna_Cygnus_atratus_GCA_013377495.2.COL1a2_Anas.consensus:AnsAna_Plectropterus_gambensis_B10K-D-WWT-22.COL1a2_Anas.consensus:AnsAna_Aythya_affinis_CL200153793_L02.COL1a2_Anas.consensus:AnsAna_Somateria_spectabilis_D2006016067.COL1a2_Anas.consensus:AnsAna_Dendrocygna_guttata_B…	DB Search
GPP(+15.99)GESGAVGPAGPIGSR	95.44	1577.78	18	-0.3	526.934	3	24.679	12043	20201209_Lumos_Ritcher_sample148_17.raw	605000000	1	1	Proline Oxidation	P3:Proline Oxidation:33.98	AnsAna_Spatula_platalea_D2007020414.COL1a2_Anas.consensus:AnsAna_Chloephaga_rubidiceps_D2104051194.COL1a2_Anas.consensus:AnsAna_Cygnus_atratus_GCA_013377495.2.COL1a2_Anas.consensus:AnsAna_Plectropterus_gambensis_B10K-D-WWT-22.COL1a2_Anas.consensus:AnsAna_Aythya_affinis_CL200153793_L02.COL1a2_Anas.consensus:AnsAna_Somateria_spectabilis_D2006016067.COL1a2_Anas.consensus:AnsAna_Dendrocygna_guttata_B…	DB Search
GPP(+15.99)GFQGLPGP(+15.99)SGPAGEAGKP(+15.99)GER	89.49	2264.08	24	-1	755.701	3	28.6109	16027	20201209_Lumos_Ritcher_sample148_17.raw		0	0	Proline Oxidation;Proline Oxidation;Proline Oxidation	P3:Proline Oxidation:0.00;P11:Proline Oxidation:11.10;P21:Proline Oxidation:38.97	AnsAna_Spatula_platalea_D2007020414.COL1a2_Anas.consensus:AnsAna_Chloephaga_rubidiceps_D2104051194.COL1a2_Anas.consensus:AnsAna_Cygnus_atratus_GCA_013377495.2.COL1a2_Anas.consensus:AnsAna_Plectropterus_gambensis_B10K-D-WWT-22.COL1a2_Anas.consensus:AnsAna_Aythya_affinis_CL200153793_L02.COL1a2_Anas.consensus:AnsAna_Somateria_spectabilis_D2006016067.COL1a2_Anas.consensus:AnsAna_Dendrocygna_guttata_B…	DB Search
GPP(+15.99)GLAGPP(+15.99)GEAGR	84.18	1263.62	14	-2.6	632.816	2	25.2754	12550	20201209_Lumos_Ritcher_sample148_17.raw	121000	1	1	Proline Oxidation;Proline Oxidation	P3:Proline Oxidation:33.98;P9:Proline Oxidation:20.00	AnsAna_Anas_undulata_B10K-D-IZW-61.COL1a1_Cyg-Gall.consensus:AnsAna_Aythya_americana_D2006016050.COL1a1_Cyg-Gall.consensus:AnsAna_Pteronetta_hartlaubii_D2102046034.COL1a1_Cyg-Gall.consensus:AnsAna_Cereopsis_novaehollandiae_B10K-D-IZW-75.COL1a1_Cyg-Gall.consensus:AnsAna_Branta_leucopsis_DBGNRM65.COL1a1_Cyg-Gall.consensus:AnsAna_Aythya_marila_GCA_029042245.1.COL1a1_Cyg-Gall.consensus:AnsAna_Tadorna…	DB Search
GPP(+15.99)GP(+15.99)MGP(+15.99)PGLAGPPGEAGR	94.37	1815.86	20	-2	606.292	3	29.8825	17254	20201209_Lumos_Ritcher_sample148_17.raw	90400	1	1	Proline Oxidation;Proline Oxidation;Proline Oxidation	P3:Proline Oxidation:17.01;P5:Proline Oxidation:12.33;P8:Proline Oxidation:27.96	AnsAna_Anas_undulata_B10K-D-IZW-61.COL1a1_Cyg-Gall.consensus:AnsAna_Aythya_americana_D2006016050.COL1a1_Cyg-Gall.consensus:AnsAna_Pteronetta_hartlaubii_D2102046034.COL1a1_Cyg-Gall.consensus:AnsAna_Cereopsis_novaehollandiae_B10K-D-IZW-75.COL1a1_Cyg-Gall.consensus:AnsAna_Branta_leucopsis_DBGNRM65.COL1a1_Cyg-Gall.consensus:AnsAna_Aythya_marila_GCA_029042245.1.COL1a1_Cyg-Gall.consensus:AnsAna_Tadorna…	DB Search
GPP(+15.99)GP(+15.99)MGPP(+15.99)GLA	53.08	1094.51	12	-0.6	548.26	2	26.7371	14114	20201209_Lumos_Ritcher_sample148_17.raw		0	0	Proline Oxidation;Proline Oxidation;Proline Oxidation	P3:Proline Oxidation:14.40;P5:Proline Oxidation:45.70;P9:Proline Oxidation:0.00	AnsAna_Anas_undulata_B10K-D-IZW-61.COL1a1_Cyg-Gall.consensus:AnsAna_Aythya_americana_D2006016050.COL1a1_Cyg-Gall.consensus:AnsAna_Pteronetta_hartlaubii_D2102046034.COL1a1_Cyg-Gall.consensus:AnsAna_Cereopsis_novaehollandiae_B10K-D-IZW-75.COL1a1_Cyg-Gall.consensus:AnsAna_Branta_leucopsis_DBGNRM65.COL1a1_Cyg-Gall.consensus:AnsAna_Aythya_marila_GCA_029042245.1.COL1a1_Cyg-Gall.consensus:AnsAna_Tadorna…	DB Search
GPP(+15.99)GP(+15.99)MGPP(+15.99)GLAGPPGEAGR	93.37	1815.86	20	-0.8	908.935	2	27.3845	14792	20201209_Lumos_Ritcher_sample148_17.raw		0	0	Proline Oxidation;Proline Oxidation;Proline Oxidation	P3:Proline Oxidation:40.00;P5:Proline Oxidation:34.94;P9:Proline Oxidation:23.10	AnsAna_Anas_undulata_B10K-D-IZW-61.COL1a1_Cyg-Gall.consensus:AnsAna_Aythya_americana_D2006016050.COL1a1_Cyg-Gall.consensus:AnsAna_Pteronetta_hartlaubii_D2102046034.COL1a1_Cyg-Gall.consensus:AnsAna_Cereopsis_novaehollandiae_B10K-D-IZW-75.COL1a1_Cyg-Gall.consensus:AnsAna_Branta_leucopsis_DBGNRM65.COL1a1_Cyg-Gall.consensus:AnsAna_Aythya_marila_GCA_029042245.1.COL1a1_Cyg-Gall.consensus:AnsAna_Tadorna…	DB Search
GPP(+15.99)GP(+15.99)MGPPGLAGPP(+15.99)GEAGR	94.64	1815.86	20	-0.7	606.293	3	26.6466	14123	20201209_Lumos_Ritcher_sample148_17.raw	112000000	2	2	Proline Oxidation;Proline Oxidation;Proline Oxidation	P3:Proline Oxidation:33.98;P5:Proline Oxidation:37.81;P15:Proline Oxidation:12.28	AnsAna_Anas_undulata_B10K-D-IZW-61.COL1a1_Cyg-Gall.consensus:AnsAna_Aythya_americana_D2006016050.COL1a1_Cyg-Gall.consensus:AnsAna_Pteronetta_hartlaubii_D2102046034.COL1a1_Cyg-Gall.consensus:AnsAna_Cereopsis_novaehollandiae_B10K-D-IZW-75.COL1a1_Cyg-Gall.consensus:AnsAna_Branta_leucopsis_DBGNRM65.COL1a1_Cyg-Gall.consensus:AnsAna_Aythya_marila_GCA_029042245.1.COL1a1_Cyg-Gall.consensus:AnsAna_Tadorna…	DB Search
[truncated: 330 more rows]

## Sheet: ST16 sample148_spider.psms
Supplementary Table 16. PEAKS 11 peptide-spectrum match (PSM) output for reanalysis of LC-MS/MS data of MC148
Peptide	-10LgP	Mass	Length	ppm	m/z	z	RT	Scan	Area	Feature Id	Source File	Accession	PTM	AScore
[truncated: 1,591 more rows]

## Sheet: ST17 sample123_spider.proteins
Supplementary Table 17. PEAKS 11 proteins output for reanalysis of LC-MS/MS data of MC123
[truncated: 473 more rows]

## Sheet: ST18 sample123_spider.peptides
Supplementary Table 18. PEAKS 11 peptides output for reanalysis of LC-MS/MS data of MC123
[truncated: 1,063 more rows]

## Sheet: ST19 sample123_spider.psms
Supplementary Table 19. PEAKS 11 peptide-spectrum match (PSM) output for reanalysis of LC-MS/MS data of MC123
[truncated: 2,013 more rows]

[truncated: 18 more sheets: ST20 sample182_spider.proteins, ST21 sample182_spider.peptides, ST22 sample182_spider.psms, ST23 sample171_spider.proteins, ST24 sample171_spider.peptides, ST25 sample171_spider.psms, ST26 PALTO_114D_spider.proteins, ST27 PALTO_114D_spider.peptides, ST28 PALTO_114D_spider.psms, ST29 PALTO_119D_spider.proteins, ST30 PALTO_119D_spider.peptides, ST31 PALTO_119D_spider.psms, ST32 Palto_689_spider.proteins, ST33 Palto_689_spider.peptides, ST34 Palto_689_spider.psms, ST35 Palto_693_spider.proteins, ST36 Palto_693_spider.peptides, ST37 Palto_693_spider.psms]
